# Supplementary material for: Probe-dependent Proximity Profiling (ProPPr) Uncovers Similarities and Differences in Phospho-Tau-Associated Proteomes Between Tauopathies
Source: Mol Neurodegener. 2025 Mar 13;20:32. doi: 10.1186/s13024-025-00817-0 (PMC11905455; doi:10.1186/s13024-025-00817-0)
Supplement: Supplementary file 3 — Supplementary Material 3. [file 13024_2025_817_MOESM3_ESM.xlsx]

## Sheet: Supplementary table 2
Table S2: Phospho-tau-associated proteins identified by mass spectrometry proteomics. PG ProteinGroups - UNIPROT accession numbers of the identified proteins; PG.Genes - gene names for the identified proteins; MiST_* - Mass Spectrometry interaction statistics (MiST) score for a protein in a given tauopathy; *_interactor: whether or not a protein was nominated as phospho-tau associated protein in …
PG.ProteinGroups	PG.Genes	PG.ProteinDescriptions	MiST_AD	MiST_CBD	MiST_PiD	MiST_PSP	AD_interactors	CBD_interactors	PiD_interactors	PSP_interactors	AD_vs_CBD_diff	AD_vs_CBD_p.adj	AD_vs_CBD_p.val	AD_vs_PiD_diff	AD_vs_PiD_p.adj	AD_vs_PiD_p.val	AD_vs_PSP_diff	AD_vs_PSP_p.adj	AD_vs_PSP_p.val	CBD_vs_PiD_diff	CBD_vs_PiD_p.adj	CBD_vs_PiD_p.val	CBD_vs_PSP_diff	CBD_vs_PSP_p.adj	CBD_vs_PSP_p.val	PiD_vs_PSP_diff	PiD_vs_PSP_p.adj	PiD_vs_PSP_p.val	AD_vs_CBD_significant	AD_vs_PiD_significant	AD_vs_PSP_significant	CBD_vs_PiD_significant	CBD_vs_PSP_significant	PiD_vs_PSP_significant
P12814	ACTN1	Alpha-actinin-1	0.91331	0.77613	0.98911	0	TRUE	TRUE	TRUE	FALSE	-0.0525763	0.972244	0.853334	-0.0356602	0.993546	0.910678	4.19129	0.0068469	3.45e-09	0.0169161	0.99444	0.957554	4.24387	1	2.84e-09	4.22695	8.46e-14	7.59e-09	FALSE	FALSE	TRUE	FALSE	FALSE	TRUE
P61163	ACTR1A	Alpha-centractin	0.83213	0.92661	0.96896	0	TRUE	TRUE	TRUE	FALSE	0.287782	0.963135	0.591791	-0.266571	0.992438	0.656434	4.11905	0.953389	2.93e-05	-0.554353	0.989232	0.359297	3.83127	1	6.7e-05	4.38562	0.000307778	2.81e-05	FALSE	FALSE	FALSE	FALSE	FALSE	TRUE
Q9UEY8	ADD3	Gamma-adducin	0.97195	0.78673	0.98849	0	TRUE	TRUE	TRUE	FALSE	-0.126485	0.969942	0.771005	-0.59036	0.98816	0.233158	3.86735	0.876479	4.94e-06	-0.463875	0.988947	0.345209	3.99383	1	3.26e-06	4.45771	8.14e-07	1.66e-06	FALSE	FALSE	FALSE	FALSE	FALSE	TRUE
P14415	ATP1B2	Sodium/potassium-transporting ATPase subunit beta-2	0.97239	0.78925	0.99044	0	TRUE	TRUE	TRUE	FALSE	0.154661	0.967923	0.709136	-0.22417	0.992289	0.629137	3.93451	0.800095	2.11e-06	-0.378831	0.990237	0.417225	3.77985	1	3.58e-06	4.15868	1.48e-06	2.21e-06	FALSE	FALSE	FALSE	FALSE	FALSE	TRUE
P23634	ATP2B4	Plasma membrane calcium-transporting ATPase 4	0.92384	0.86577	0.98872	0	TRUE	TRUE	TRUE	FALSE	0.430094	0.913606	0.190194	0.183618	0.992176	0.609571	4.90634	0.0031802	1.9e-09	-0.246476	0.991268	0.494282	4.47625	1	8.02e-09	4.72273	8.46e-14	8.7e-09	FALSE	FALSE	TRUE	FALSE	FALSE	TRUE
P24539	ATP5PB	ATP synthase F(0) complex subunit B1, mitochondrial	0.95751	0.68551	0	0	TRUE	FALSE	FALSE	FALSE	2.66761	5.19e-06	1.08e-06	2.96611	0.187922	1.16e-06	2.96611	0.947401	2.33e-05	0.298499	0.991126	0.48238	0.298499	1	0.577663	0	0.945566	1	TRUE	FALSE	FALSE	FALSE	FALSE	FALSE
P54289	CACNA2D1	Voltage-dependent calcium channel subunit alpha-2/delta-1	0.97492	0.79876	0.98199	0	TRUE	TRUE	TRUE	FALSE	-0.297403	0.950331	0.39923	-0.216636	0.992002	0.580679	3.81181	0.479449	3.17e-07	0.0807673	0.99388	0.836236	4.10922	1	1.07e-07	4.02845	1.34e-08	3.34e-07	FALSE	FALSE	FALSE	FALSE	FALSE	TRUE
P60953	CDC42	Cell division control protein 42 homolog	0.36468	0.80843	0.85417	0	FALSE	TRUE	TRUE	FALSE	0.746417	0.924993	0.230052	0.863917	0.987746	0.214697	4.92044	0.937438	1.68e-05	0.1175	0.994014	0.863118	4.17402	1	0.000109945	4.05652	0.0105796	0.000271747	FALSE	FALSE	FALSE	FALSE	FALSE	TRUE
Q9UHC6	CNTNAP2	Contactin-associated protein-like 2	0.98368	0.88069	0.96958	0	TRUE	TRUE	TRUE	FALSE	0.255453	0.96366	0.602984	-0.173389	0.992905	0.75161	4.83718	0.732733	1.25e-06	-0.428842	0.990529	0.436991	4.58173	1	2.59e-06	5.01057	8.75e-07	1.72e-06	FALSE	FALSE	FALSE	FALSE	FALSE	TRUE
Q9P265	DIP2B	Disco-interacting protein 2 homolog B	0.94463	0.68551	0	0	TRUE	FALSE	FALSE	FALSE	2.50886	0.00707831	6.43e-05	2.92659	0.427639	3.98e-05	2.92659	0.987301	0.000468954	0.41773	0.990741	0.452297	0.41773	1	0.551209	0	0.945566	1	TRUE	FALSE	FALSE	FALSE	FALSE	FALSE
Q9Y3D6	FIS1	Mitochondrial fission 1 protein	0.96281	0.1039	0.68551	0	TRUE	FALSE	FALSE	FALSE	2.81283	6.16e-05	3.99e-06	2.81361	0.297216	1.61e-05	3.13405	0.969986	7.03e-05	0.000777826	0.994606	0.998736	0.321218	1	0.60631	0.32044	0.921809	0.627743	TRUE	FALSE	FALSE	FALSE	FALSE	FALSE
P02792	FTL	Ferritin light chain	0.91506	0.9555	0.96321	0.99032	TRUE	TRUE	TRUE	TRUE	-1.94195	0.0116132	0.000142535	-0.823934	0.982053	0.085499	-0.311435	0.998919	0.593425	1.11802	0.93281	0.0237538	1.63052	1	0.010676	0.512499	0.892682	0.410105	TRUE	FALSE	FALSE	FALSE	FALSE	FALSE
Q14344	GNA13	Guanine nucleotide-binding protein subunit alpha-13	0.98038	0.85763	0.97112	0	TRUE	TRUE	TRUE	FALSE	1.43287	0.719995	0.0365008	0.276683	0.992667	0.701109	5.32167	0.926705	1.26e-05	-1.15619	0.977931	0.120432	3.88881	1	0.000393607	5.04499	0.00075148	4.74e-05	FALSE	FALSE	FALSE	FALSE	FALSE	TRUE
Q9HAV0	GNB4	Guanine nucleotide-binding protein subunit beta-4	0.95642	0.36549	0.68551	0.68551	TRUE	FALSE	FALSE	FALSE	1.80282	0.0114488	0.000137402	1.70902	0.837431	0.000695711	0.220052	0.998973	0.682953	-0.0937997	0.993824	0.825412	-1.58277	1	0.00787744	-1.48897	0.420096	0.0162799	TRUE	FALSE	FALSE	FALSE	FALSE	FALSE
P49840	GSK3A	Glycogen synthase kinase-3 alpha	0.92325	0.30291	0.68551	0	TRUE	FALSE	FALSE	FALSE	2.74903	0.0316567	0.000343605	2.91159	0.821477	0.000575444	3.57222	0.989597	0.000760993	0.162563	0.993789	0.81882	0.823194	1	0.364366	0.660631	0.905924	0.490382	TRUE	FALSE	FALSE	FALSE	FALSE	FALSE
Q92598	HSPH1	Heat shock protein 105 kDa	0.99013	0.75433	0.97282	0	TRUE	TRUE	TRUE	FALSE	0.083074	0.97089	0.80324	-0.446309	0.988301	0.239964	4.49056	0.0385713	1.39e-08	-0.529383	0.982193	0.166595	4.40749	1	1.85e-08	4.93687	8.46e-14	8e-09	FALSE	FALSE	TRUE	FALSE	FALSE	TRUE
P06756	ITGAV	Integrin alpha-V	0.97184	0.68656	0.68551	0	TRUE	FALSE	FALSE	FALSE	0.335224	0.952225	0.4204	3.07555	0.187922	2.34e-06	3.55373	0.902537	7.52e-06	2.74032	0.0166925	1.03e-05	3.2185	1	2.52e-05	0.478179	0.898615	0.443152	FALSE	FALSE	FALSE	TRUE	FALSE	FALSE
P43243	MATR3	Matrin-3	0.96252	0.37135	0	0	TRUE	FALSE	FALSE	FALSE	2.63543	0.0064372	5.78e-05	3.34314	0.284952	1.31e-05	3.34314	0.981002	0.000186045	0.707712	0.985459	0.22688	0.707712	1	0.335728	0	0.945566	1	TRUE	FALSE	FALSE	FALSE	FALSE	FALSE
Q9H115	NAPB	Beta-soluble NSF attachment protein	0.78	0.89788	0.9387	0	TRUE	TRUE	TRUE	FALSE	0.066894	0.973032	0.884955	-0.274455	0.9921	0.596784	4.75967	0.641653	7.15e-07	-0.341349	0.991463	0.511458	4.69278	1	8.69e-07	5.03412	1.2e-07	7.44e-07	FALSE	FALSE	FALSE	FALSE	FALSE	TRUE
O95299	NDUFA10	NADH dehydrogenase [ubiquinone] 1 alpha subcomplex subunit 10, mitochondrial	0.95024	0.42482	0	0	TRUE	FALSE	FALSE	FALSE	2.93135	0.0120308	0.000157386	3.83434	0.365914	2.76e-05	3.83434	0.98555	0.000346045	0.902994	0.984569	0.207195	0.902994	1	0.314687	0	0.945566	1	TRUE	FALSE	FALSE	FALSE	FALSE	FALSE
Q92859	NEO1	Neogenin	0.97483	0.90135	0.95525	0	TRUE	TRUE	TRUE	FALSE	-0.178805	0.967549	0.698596	0.175285	0.992825	0.734095	2.91997	0.983262	0.000247013	0.35409	0.991273	0.494735	3.09878	1	0.000133847	2.74469	0.0434133	0.000780833	FALSE	FALSE	FALSE	FALSE	FALSE	TRUE
Q15818	NPTX1	Neuronal pentraxin-1	0.98961	0.78464	0.99025	0	TRUE	TRUE	TRUE	FALSE	0.632485	0.733594	0.0393619	0.169258	0.992129	0.601562	4.26378	0.00666581	3.38e-09	-0.463228	0.981928	0.162897	3.6313	1	4e-08	4.09452	2.54e-13	1.58e-08	FALSE	FALSE	TRUE	FALSE	FALSE	TRUE
P46781	RPS9	40S ribosomal protein S9	0.75862	0.774	0.94827	0	TRUE	TRUE	TRUE	FALSE	-0.132423	0.968594	0.728739	-0.394612	0.990141	0.360182	3.2105	0.917097	1.01e-05	-0.262189	0.991771	0.540567	3.34292	1	6.05e-06	3.60511	9.07e-06	4.89e-06	FALSE	FALSE	FALSE	FALSE	FALSE	TRUE
Q6UXD5	SEZ6L2	Seizure 6-like protein 2	0.97251	0.83513	0.94435	0	TRUE	TRUE	TRUE	FALSE	0.882529	0.827284	0.0736838	0.477619	0.990256	0.370225	4.00384	0.912095	9.04e-06	-0.40491	0.990656	0.446035	3.12131	1	0.000157412	3.52622	0.00175154	8.01e-05	FALSE	FALSE	FALSE	FALSE	FALSE	TRUE
P12236	SLC25A6	ADP/ATP translocase 3	0.942	0.45026	0	0	TRUE	FALSE	FALSE	FALSE	2.8785	0.0323117	0.000350203	3.86933	0.471485	5.02e-05	3.86933	0.988275	0.000567963	0.990829	0.983864	0.193547	0.990829	1	0.29977	0	0.945566	1	TRUE	FALSE	FALSE	FALSE	FALSE	FALSE
Q9Y6R1	SLC4A4	Electrogenic sodium bicarbonate cotransporter 1	0.9842	0.76666	0.90577	0	TRUE	TRUE	TRUE	FALSE	0.196259	0.969554	0.758426	-0.157474	0.99322	0.825201	4.16317	0.980773	0.000181186	-0.353734	0.992497	0.620778	3.96691	1	0.000295185	4.32064	0.00828572	0.000226331	FALSE	FALSE	FALSE	FALSE	FALSE	TRUE
Q92563	SPOCK2	Testican-2	0.96928	0.85442	0	0	TRUE	TRUE	FALSE	FALSE	2.59855	0.0107726	0.000119439	3.90527	0.187922	3.57e-06	3.90527	0.967961	6.15e-05	1.30672	0.954656	0.0416647	1.30672	1	0.100087	0	0.945566	1	TRUE	FALSE	FALSE	FALSE	FALSE	FALSE
Q5T5C0	STXBP5	Syntaxin-binding protein 5	0.91024	0.41987	0.68551	0.68551	TRUE	FALSE	FALSE	FALSE	0.751116	0.883822	0.127331	0.0616665	0.993536	0.907883	-2.80237	0.987753	0.000511412	-0.689449	0.984507	0.205921	-3.55348	1	4.3e-05	-2.86403	0.0394442	0.000720702	FALSE	FALSE	FALSE	FALSE	FALSE	TRUE
P37802	TAGLN2	Transgelin-2	0.85097	0.75609	0.96461	0	TRUE	TRUE	TRUE	FALSE	0.859494	0.91949	0.209156	-0.633289	0.990595	0.402008	4.277	0.982612	0.000226681	-1.49278	0.963923	0.0580777	3.4175	1	0.00176634	4.91029	0.00237144	9.89e-05	FALSE	FALSE	FALSE	FALSE	FALSE	TRUE
O60763	USO1	General vesicular transport factor p115	0.96947	0.06934	0	0	TRUE	FALSE	FALSE	FALSE	1.68217	0.00940556	9.33e-05	1.92222	0.541667	7.35e-05	1.92222	0.989675	0.000775348	0.240047	0.991687	0.532426	0.240047	1	0.620903	0	0.945566	1	TRUE	FALSE	FALSE	FALSE	FALSE	FALSE
O15240	VGF	Neurosecretory protein VGF	0.96749	0.77081	0.98718	0	TRUE	TRUE	TRUE	FALSE	1.05387	0.860611	0.0992301	-1.07802	0.984874	0.129168	3.95299	0.982149	0.000213713	-2.13189	0.812142	0.00557042	2.89912	1	0.00330569	5.03101	0.000325225	2.9e-05	FALSE	FALSE	FALSE	FALSE	FALSE	TRUE
A0A0J9YY99		Ig-like domain-containing protein (Fragment)	0.76306	0.24744	0	0.68552	TRUE	FALSE	FALSE	FALSE	NA	NA	NA	NA	NA	NA	NA	NA	NA	NA	NA	NA	NA	NA	NA	NA	NA	NA	NA	NA	NA	NA	NA	NA
P04217	A1BG	Alpha-1B-glycoprotein	0.74474	0.8827	0	0.68551	FALSE	TRUE	FALSE	FALSE	0.972797	0.943828	0.338876	2.82191	0.966742	0.0200712	0.634976	0.998957	0.655656	1.84911	0.976848	0.112069	-0.337822	1	0.812102	-2.18694	0.789802	0.158103	FALSE	FALSE	FALSE	FALSE	FALSE	FALSE
P01023	A2M	Alpha-2-macroglobulin	0.76521	0.88614	0.57798	0.99085	TRUE	TRUE	FALSE	TRUE	-0.356935	0.938509	0.300284	0.174493	0.992385	0.6466	0.453687	0.998706	0.350488	0.531428	0.982602	0.172577	0.810622	1	0.103872	0.279194	0.917535	0.584989	FALSE	FALSE	FALSE	FALSE	FALSE	FALSE
Q2M2I8	AAK1	AP2-associated protein kinase 1	0.89677	0.869	0	0	TRUE	TRUE	FALSE	FALSE	NA	NA	NA	NA	NA	NA	NA	NA	NA	NA	NA	NA	NA	NA	NA	NA	NA	NA	NA	NA	NA	NA	NA	NA
P49588	AARS1	Alanine--tRNA ligase, cytoplasmic	0.98229	0.65293	0.91714	0	TRUE	FALSE	TRUE	FALSE	0.634959	0.959337	0.5203	-0.484946	0.992455	0.659557	4.14023	0.995509	0.00726193	-1.11991	0.988255	0.314602	3.50527	1	0.0196289	4.62518	0.206716	0.00510139	FALSE	FALSE	FALSE	FALSE	FALSE	FALSE
P80404	ABAT	4-aminobutyrate aminotransferase, mitochondrial	0.4253	0.83218	0.83175	0	FALSE	TRUE	TRUE	FALSE	1.02099	0.893176	0.142727	2.57472	0.917652	0.00279142	4.243	0.983911	0.000270224	1.55373	0.960777	0.0514086	3.22202	1	0.00303023	1.66828	0.736606	0.112268	FALSE	FALSE	FALSE	FALSE	FALSE	FALSE
Q9NUJ1	ABHD10	Palmitoyl-protein thioesterase ABHD10, mitochondrial	0.96221	0.63384	0.76906	0.68551	TRUE	FALSE	TRUE	FALSE	-0.373113	0.953134	0.431253	-0.0642	0.993517	0.902767	-1.00176	0.998281	0.14369	0.308913	0.991947	0.558466	-0.628649	1	0.350141	-0.937562	0.817228	0.194083	FALSE	FALSE	FALSE	FALSE	FALSE	FALSE
Q96IU4	ABHD14B	Putative protein-lysine deacylase ABHD14B	0.69881	0.77706	0.83893	0	FALSE	TRUE	TRUE	FALSE	-0.221837	0.964561	0.623076	1.17065	0.971931	0.0296604	1.72291	0.996332	0.013215	1.39249	0.888065	0.0115871	1.94475	1	0.00613933	0.552255	0.894061	0.417411	FALSE	FALSE	FALSE	FALSE	FALSE	FALSE
Q6H8Q1	ABLIM2	Actin-binding LIM protein 2	0.87449	0.34149	0.68551	0	TRUE	FALSE	FALSE	FALSE	NA	NA	NA	NA	NA	NA	NA	NA	NA	NA	NA	NA	NA	NA	NA	NA	NA	NA	NA	NA	NA	NA	NA	NA
P16112	ACAN	Aggrecan core protein	0.97345	0.6905	0.92904	0.68551	TRUE	FALSE	TRUE	FALSE	0.0363282	0.974158	0.93361	-0.203272	0.992548	0.677456	0.279482	0.998955	0.651334	-0.2396	0.992525	0.624269	0.243154	1	0.693992	0.482754	0.901973	0.463863	FALSE	FALSE	FALSE	FALSE	FALSE	FALSE
P24752	ACAT1	Acetyl-CoA acetyltransferase, mitochondrial	0.68438	0.79549	0.68551	0.68551	FALSE	TRUE	FALSE	FALSE	0.437152	0.946954	0.365763	0.349559	0.991563	0.515375	0.62299	0.99872	0.362165	-0.0875931	0.994046	0.869798	0.185838	1	0.783513	0.273431	0.928295	0.70339	FALSE	FALSE	FALSE	FALSE	FALSE	FALSE
Q9BWD1	ACAT2	Acetyl-CoA acetyltransferase, cytosolic	0.73397	0.73265	0.83331	0.98974	FALSE	FALSE	TRUE	TRUE	0.234597	0.966358	0.666737	0.174503	0.993005	0.774173	-0.582598	0.998811	0.451964	-0.0600943	0.994284	0.921211	-0.817196	1	0.295056	-0.757101	0.881675	0.358661	FALSE	FALSE	FALSE	FALSE	FALSE	FALSE
P53396	ACLY	ATP-citrate synthase	0.97954	0.66286	0.82876	0	TRUE	FALSE	TRUE	FALSE	1.7133	0.691336	0.0313945	2.24904	0.960276	0.0134338	4.22096	0.989356	0.000719102	0.535743	0.991582	0.522396	2.50766	1	0.0265651	1.97191	0.697692	0.0902323	FALSE	FALSE	FALSE	FALSE	FALSE	FALSE
P21399	ACO1	Cytoplasmic aconitate hydratase	0.94587	0.74217	0.68551	0	TRUE	FALSE	FALSE	FALSE	0.816785	0.902065	0.160563	2.4008	0.874068	0.00116719	2.91629	0.992308	0.00164209	1.58402	0.925513	0.0205328	2.09951	1	0.0158981	0.515491	0.913136	0.545827	FALSE	FALSE	FALSE	FALSE	FALSE	FALSE
Q99798	ACO2	Aconitate hydratase, mitochondrial	0.86889	0.73905	0.97655	0.68551	TRUE	FALSE	TRUE	FALSE	-0.218268	0.963762	0.60522	0.0925035	0.993295	0.844161	-0.0546568	0.999088	0.926807	0.310772	0.991462	0.511339	0.163611	1	0.783528	-0.14716	0.936047	0.815732	FALSE	FALSE	FALSE	FALSE	FALSE	FALSE
Q9NPJ3	ACOT13	Acyl-coenzyme A thioesterase 13	0.86036	0.64989	0	0	TRUE	FALSE	FALSE	FALSE	NA	NA	NA	NA	NA	NA	NA	NA	NA	NA	NA	NA	NA	NA	NA	NA	NA	NA	NA	NA	NA	NA	NA	NA
O00154	ACOT7	Cytosolic acyl coenzyme A thioester hydrolase	0.88272	0.85965	0.97291	0.87493	TRUE	TRUE	TRUE	TRUE	-0.805908	0.814953	0.0668672	-0.669334	0.986319	0.164635	0.613636	0.99865	0.307687	0.136574	0.993525	0.770981	1.41954	1	0.025793	1.28297	0.625309	0.0530986	FALSE	FALSE	FALSE	FALSE	FALSE	FALSE
P24666	ACP1	Low molecular weight phosphotyrosine protein phosphatase	0.91762	0.64631	0.68551	0.68551	TRUE	FALSE	FALSE	FALSE	0.340028	0.968056	0.71295	-1.05045	0.989568	0.315344	-0.749027	0.998901	0.567657	-1.39048	0.983574	0.188355	-1.08905	1	0.408373	0.301426	0.936767	0.82767	FALSE	FALSE	FALSE	FALSE	FALSE	FALSE
P11117	ACP2	Lysosomal acid phosphatase	0.91736	0.85125	0.68551	0	TRUE	TRUE	FALSE	FALSE	NA	NA	NA	NA	NA	NA	NA	NA	NA	NA	NA	NA	NA	NA	NA	NA	NA	NA	NA	NA	NA	NA	NA	NA
P68133	ACTA1	Actin, alpha skeletal muscle	0.44725	0.44812	0.66175	0.7569	FALSE	FALSE	FALSE	TRUE	0.571045	0.903022	0.162711	0.566507	0.987702	0.212851	0.888729	0.998212	0.12656	-0.00453826	0.994579	0.99186	0.317684	1	0.574066	0.322222	0.918144	0.590783	FALSE	FALSE	FALSE	FALSE	FALSE	FALSE
P60709	ACTB	Actin, cytoplasmic 1	0.52715	0.42726	0.85211	0.99131	FALSE	FALSE	TRUE	TRUE	0.775407	0.542505	0.0160607	0.837636	0.966247	0.0194061	0.951376	0.997284	0.0333253	0.0622289	0.993954	0.851008	0.175969	1	0.675159	0.11374	0.934951	0.798119	FALSE	FALSE	FALSE	FALSE	FALSE	FALSE
Q562R1	ACTBL2	Beta-actin-like protein 2	0.63053	0.69096	0.85578	0.68551	FALSE	FALSE	TRUE	FALSE	-0.929162	0.928645	0.246001	0.0601546	0.993669	0.945414	-0.125843	0.999081	0.909855	0.989316	0.986972	0.268413	0.803319	1	0.472975	-0.185997	0.939445	0.874657	FALSE	FALSE	FALSE	FALSE	FALSE	FALSE
P62736;P63267	ACTG2	Actin, aortic smooth muscle;Actin, gamma-enteric smooth muscle	0.98206	0.89901	0.94974	0.73716	TRUE	TRUE	TRUE	FALSE	NA	NA	NA	NA	NA	NA	NA	NA	NA	NA	NA	NA	NA	NA	NA	NA	NA	NA	NA	NA	NA	NA	NA	NA
P35609	ACTN2	Alpha-actinin-2	0.97978	0.78651	0.90423	0.68551	TRUE	TRUE	TRUE	FALSE	0.118997	0.968337	0.721117	0.26045	0.991348	0.486866	0.394981	0.998767	0.405878	0.141452	0.993111	0.704361	0.275983	1	0.559459	0.134531	0.934287	0.787737	FALSE	FALSE	FALSE	FALSE	FALSE	FALSE
O43707	ACTN4	Alpha-actinin-4	0.85067	0.85305	0.85447	0.96098	TRUE	TRUE	TRUE	TRUE	0.432004	0.930258	0.253668	0.296757	0.991278	0.478105	0.967253	0.997923	0.0782231	-0.135246	0.993371	0.7451	0.535249	1	0.315255	0.670495	0.841493	0.238155	FALSE	FALSE	FALSE	FALSE	FALSE	FALSE
P42025	ACTR1B	Beta-centractin	0.85422	0.87101	0.68551	0	TRUE	TRUE	FALSE	FALSE	1.27138	0.922188	0.218974	2.61393	0.972385	0.0308044	4.00691	0.996083	0.0108544	1.34255	0.986156	0.244571	2.73553	1	0.068434	1.39298	0.883063	0.364544	FALSE	FALSE	FALSE	FALSE	FALSE	FALSE
P61160	ACTR2	Actin-related protein 2	0.98775	0.83261	0.90829	0.68551	TRUE	TRUE	TRUE	FALSE	-0.118297	0.97041	0.786621	-0.326463	0.991495	0.506233	0.0830349	0.999074	0.893037	-0.208166	0.992877	0.670535	0.201332	1	0.744711	0.409498	0.9117	0.533976	FALSE	FALSE	FALSE	FALSE	FALSE	FALSE
P61158	ACTR3	Actin-related protein 3	0.81285	0.85854	0.69844	0.68551	TRUE	TRUE	FALSE	FALSE	-0.127313	0.971341	0.819356	0.114684	0.993334	0.853976	-0.0557761	0.999095	0.943562	0.241997	0.99307	0.698219	0.071537	1	0.927656	-0.17046	0.937403	0.83845	FALSE	FALSE	FALSE	FALSE	FALSE	FALSE
P14621	ACYP2	Acylphosphatase-2	0.92818	0.72806	0.98013	0.9001	TRUE	FALSE	TRUE	TRUE	-0.430621	0.936089	0.285165	-0.603582	0.98694	0.184151	-0.796336	0.99836	0.166872	-0.172961	0.993062	0.696986	-0.365715	1	0.516697	-0.192754	0.931476	0.746193	FALSE	FALSE	FALSE	FALSE	FALSE	FALSE
Q9P0K1	ADAM22	Disintegrin and metalloproteinase domain-containing protein 22	0.97855	0.59177	0.68551	0	TRUE	FALSE	FALSE	FALSE	2.19649	0.5164	0.0144339	3.4521	0.880069	0.00128896	4.21417	0.992467	0.00173432	1.25561	0.983289	0.183485	2.01768	1	0.0958126	0.762067	0.912361	0.539383	FALSE	FALSE	FALSE	FALSE	FALSE	FALSE
O75077	ADAM23	Disintegrin and metalloproteinase domain-containing protein 23	0.96312	0.42856	0.68551	0	TRUE	FALSE	FALSE	FALSE	1.26409	0.835552	0.0789173	2.17233	0.955252	0.0103082	3.06863	0.994874	0.00496919	0.908237	0.986243	0.246937	1.80454	1	0.0763638	0.896303	0.88874	0.390351	FALSE	FALSE	FALSE	FALSE	FALSE	FALSE
P35611	ADD1	Alpha-adducin	0.69773	0.84029	0.94989	0.98238	FALSE	TRUE	TRUE	TRUE	0.169398	0.962204	0.572781	0.257834	0.990994	0.44435	0.847707	0.997707	0.0570114	0.0884364	0.993642	0.791577	0.678309	1	0.121134	0.589873	0.820305	0.198916	FALSE	FALSE	FALSE	FALSE	FALSE	FALSE
P35612	ADD2	Beta-adducin	0.37514	0.83467	0.97703	0.68551	FALSE	TRUE	TRUE	FALSE	0.0851254	0.971006	0.807333	0.246093	0.991669	0.53026	-0.106723	0.999046	0.828808	0.160967	0.992948	0.680474	-0.191849	1	0.697918	-0.352816	0.90765	0.502771	FALSE	FALSE	FALSE	FALSE	FALSE	FALSE
Q9HAR2	ADGRL3	Adhesion G protein-coupled receptor L3	0.97114	0.90968	0.68551	0	TRUE	TRUE	FALSE	FALSE	1.35374	0.828771	0.0745822	2.85565	0.906961	0.0021676	3.61873	0.993036	0.00213639	1.50192	0.970124	0.0766441	2.26499	1	0.0379753	0.763072	0.905321	0.486178	FALSE	FALSE	FALSE	FALSE	FALSE	FALSE
P11766	ADH5	Alcohol dehydrogenase class-3	0.87234	0.7233	0.91227	0	TRUE	FALSE	TRUE	FALSE	0.68818	0.944601	0.345198	0.761433	0.990021	0.350099	4.02073	0.989907	0.000820306	0.0732528	0.994311	0.927493	3.33255	1	0.00378625	3.2593	0.250032	0.00669373	FALSE	FALSE	FALSE	FALSE	FALSE	FALSE
Q9NX46	ADPRS	ADP-ribosylhydrolase ARH3	0.92415	0.63528	0	0	TRUE	FALSE	FALSE	FALSE	-0.311147	0.963326	0.595814	1.29766	0.979054	0.059066	1.29766	0.998221	0.128591	1.60881	0.929867	0.0223561	1.60881	1	0.0637931	0	0.945566	1	FALSE	FALSE	FALSE	FALSE	FALSE	FALSE
Q96P47	AGAP3	Arf-GAP with GTPase, ANK repeat and PH domain-containing protein 3	0.80009	0.18373	0.68551	0	TRUE	FALSE	FALSE	FALSE	NA	NA	NA	NA	NA	NA	NA	NA	NA	NA	NA	NA	NA	NA	NA	NA	NA	NA	NA	NA	NA	NA	NA	NA
O00468	AGRN	Agrin	0.92246	0.6533	0.68551	0	TRUE	FALSE	FALSE	FALSE	0.358626	0.968786	0.734518	2.30132	0.979678	0.0634795	3.26169	0.997433	0.0397993	1.94269	0.976888	0.112356	2.90307	1	0.064135	0.960373	0.913193	0.546306	FALSE	FALSE	FALSE	FALSE	FALSE	FALSE
P01019	AGT	Angiotensinogen	0.9642	0.88493	0.83281	0	TRUE	TRUE	TRUE	FALSE	0.329654	0.961081	0.55119	1.7051	0.957462	0.0115322	3.04015	0.990296	0.000904771	1.37545	0.949697	0.035883	2.71049	1	0.00236271	1.33504	0.745359	0.118305	FALSE	FALSE	FALSE	FALSE	FALSE	FALSE
P23526	AHCY	Adenosylhomocysteinase	0.85104	0.58858	0.83916	0.68551	TRUE	FALSE	TRUE	FALSE	-0.460754	0.948627	0.381714	-0.936053	0.984435	0.120533	0.325097	0.99896	0.659961	-0.475299	0.990262	0.418878	0.785851	1	0.293756	1.26115	0.746427	0.119075	FALSE	FALSE	FALSE	FALSE	FALSE	FALSE
O43865	AHCYL1	S-adenosylhomocysteine hydrolase-like protein 1	0.97762	0.71131	0.90617	0.68551	TRUE	FALSE	TRUE	FALSE	0.887835	0.833085	0.0772931	-0.851533	0.984688	0.1254	0.493094	0.998828	0.471444	-1.73937	0.76852	0.00410932	-0.394741	1	0.563264	1.34463	0.670744	0.0747074	FALSE	FALSE	FALSE	FALSE	FALSE	FALSE
Q96HN2	AHCYL2	Adenosylhomocysteinase 3	0.91064	0.80147	0.68551	0	TRUE	TRUE	FALSE	FALSE	2.46007	0.70363	0.0334486	2.60619	0.975963	0.0426285	3.7709	0.996919	0.0224928	0.146116	0.994207	0.904052	1.31083	1	0.397272	1.16472	0.903965	0.47693	FALSE	FALSE	FALSE	FALSE	FALSE	FALSE
Q09666	AHNAK	Neuroblast differentiation-associated protein AHNAK	0.89062	0.74739	0.90604	0.9893	TRUE	FALSE	TRUE	TRUE	0.00857274	0.975177	0.981507	-1.00731	0.969042	0.0236522	-0.481372	0.998721	0.363011	-1.01588	0.930493	0.0226412	-0.489945	1	0.354726	0.525937	0.879333	0.349087	FALSE	FALSE	FALSE	FALSE	FALSE	FALSE
O95433	AHSA1	Activator of 90 kDa heat shock protein ATPase homolog 1	0.90723	0.86944	0.68551	0	TRUE	TRUE	FALSE	FALSE	NA	NA	NA	NA	NA	NA	NA	NA	NA	NA	NA	NA	NA	NA	NA	NA	NA	NA	NA	NA	NA	NA	NA	NA
P02765	AHSG	Alpha-2-HS-glycoprotein	0.85119	0	0	0	TRUE	FALSE	FALSE	FALSE	NA	NA	NA	NA	NA	NA	NA	NA	NA	NA	NA	NA	NA	NA	NA	NA	NA	NA	NA	NA	NA	NA	NA	NA
P00568	AK1	Adenylate kinase isoenzyme 1	0.86776	0.8586	0.57548	0.90433	TRUE	TRUE	FALSE	TRUE	-0.930337	0.710847	0.0347464	0.0583757	0.993505	0.899491	-0.194617	0.999003	0.739547	0.988713	0.956037	0.0435681	0.735719	1	0.217973	-0.252993	0.926739	0.683905	FALSE	FALSE	FALSE	FALSE	FALSE	FALSE
Q9Y6K8	AK5	Adenylate kinase isoenzyme 5	0.86223	0.78682	0.68551	0	TRUE	TRUE	FALSE	FALSE	0.470874	0.964185	0.61457	1.86249	0.982135	0.0864539	2.96212	0.997325	0.034966	1.39162	0.983792	0.192231	2.49124	1	0.0711383	1.09963	0.897284	0.435362	FALSE	FALSE	FALSE	FALSE	FALSE	FALSE
Q02952	AKAP12	A-kinase anchor protein 12	0.94654	0.78678	0.68551	0	TRUE	TRUE	FALSE	FALSE	1.60368	0.742605	0.0414472	3.51589	0.791793	0.000420614	4.45606	0.986597	0.000412739	1.91221	0.944126	0.0308744	2.85239	1	0.0128249	0.940172	0.891153	0.402253	FALSE	FALSE	FALSE	FALSE	FALSE	FALSE
P14550	AKR1A1	Aldo-keto reductase family 1 member A1	0.98617	0.66882	0.68551	0	TRUE	FALSE	FALSE	FALSE	1.11711	0.884509	0.128363	2.79987	0.906723	0.0021562	3.73558	0.991806	0.00139261	1.68277	0.957385	0.045576	2.61847	1	0.0165302	0.935706	0.887672	0.385269	FALSE	FALSE	FALSE	FALSE	FALSE	FALSE
P15121	AKR1B1	Aldo-keto reductase family 1 member B1	0.83264	0.84318	0.92062	0.68551	TRUE	TRUE	TRUE	FALSE	0.290552	0.961989	0.568535	0.495051	0.990447	0.387693	0.551051	0.998806	0.446098	0.204499	0.993207	0.718882	0.260499	1	0.71699	0.0559999	0.942866	0.94133	FALSE	FALSE	FALSE	FALSE	FALSE	FALSE
O43488	AKR7A2	Aflatoxin B1 aldehyde reductase member 2	0.97408	0.82991	0.91169	0	TRUE	TRUE	TRUE	FALSE	-0.0564436	0.974108	0.93137	1.36709	0.981002	0.0745866	4.5756	0.973292	8.95e-05	1.42353	0.966345	0.0643049	4.63204	1	7.82e-05	3.20851	0.178582	0.00386538	FALSE	FALSE	FALSE	FALSE	FALSE	FALSE
P13716	ALAD	Delta-aminolevulinic acid dehydratase	0.96647	0.71653	0.97054	0.88884	TRUE	FALSE	TRUE	TRUE	-0.52384	0.927439	0.240531	-0.494471	0.98962	0.319083	-1.20497	0.997787	0.0638429	0.0293695	0.994417	0.952146	-0.681129	1	0.279135	-0.710498	0.861072	0.286907	FALSE	FALSE	FALSE	FALSE	FALSE	FALSE
P49065	ALB	Serum albumin	0.59882	0.55752	0.64022	0.98948	FALSE	FALSE	FALSE	TRUE	-0.405185	0.950848	0.404829	-0.642326	0.988343	0.242051	-1.35209	0.997735	0.0592433	-0.237141	0.992805	0.660536	-0.946909	1	0.175615	-0.709768	0.874969	0.332332	FALSE	FALSE	FALSE	FALSE	FALSE	FALSE
Q13740	ALCAM	CD166 antigen	0.98717	0.76613	0.83816	0	TRUE	TRUE	TRUE	FALSE	0.0279503	0.974686	0.957952	1.92387	0.930835	0.00402454	3.45144	0.981069	0.000187518	1.89592	0.781494	0.00447346	3.42349	1	0.00020382	1.52757	0.657379	0.0670826	FALSE	FALSE	FALSE	FALSE	FALSE	FALSE
P00352	ALDH1A1	Aldehyde dehydrogenase 1A1	0.82586	0.79469	0.83287	0.68551	TRUE	TRUE	TRUE	FALSE	0.237244	0.960553	0.541513	0.885343	0.977949	0.0522701	0.949302	0.998046	0.0951411	0.648099	0.980542	0.145635	0.712058	1	0.20304	0.0639591	0.941421	0.912181	FALSE	FALSE	FALSE	FALSE	FALSE	FALSE
O75891	ALDH1L1	Cytosolic 10-formyltetrahydrofolate dehydrogenase	0.98927	0.4641	0.99226	0.9369	TRUE	FALSE	TRUE	TRUE	-0.681995	0.715132	0.0355522	-0.475558	0.986617	0.173611	-0.205193	0.998945	0.634782	0.206437	0.991828	0.546305	0.476803	1	0.276222	0.270366	0.914306	0.555812	FALSE	FALSE	FALSE	FALSE	FALSE	FALSE
P05091	ALDH2	Aldehyde dehydrogenase, mitochondrial	0.78109	0.74503	0.83965	0.68551	TRUE	FALSE	TRUE	FALSE	0.463642	0.946118	0.35822	-0.219239	0.992636	0.694765	0.475604	0.998854	0.502753	-0.682882	0.985592	0.230093	0.011962	1	0.986467	0.694844	0.88167	0.358639	FALSE	FALSE	FALSE	FALSE	FALSE	FALSE
P30038	ALDH4A1	Delta-1-pyrroline-5-carboxylate dehydrogenase, mitochondrial	0.95495	0.57281	0.92548	0.68551	TRUE	FALSE	TRUE	FALSE	0.888876	0.849785	0.0894955	0.0678566	0.993521	0.903856	0.38271	0.998917	0.591605	-0.82102	0.981364	0.155475	-0.506166	1	0.479286	0.314853	0.926154	0.676815	FALSE	FALSE	FALSE	FALSE	FALSE	FALSE
P51649	ALDH5A1	Succinate-semialdehyde dehydrogenase, mitochondrial	0.75582	0.83199	0.97514	0.86001	TRUE	TRUE	TRUE	TRUE	-0.499082	0.934525	0.276079	-1.32046	0.963202	0.0159543	-1.57715	0.996887	0.0217875	-0.821378	0.97731	0.115508	-1.07807	1	0.103314	-0.256693	0.928395	0.704672	FALSE	FALSE	FALSE	FALSE	FALSE	FALSE
Q02252	ALDH6A1	Methylmalonate-semialdehyde dehydrogenase [acylating], mitochondrial	0.95728	0.61624	0.91803	0.68551	TRUE	FALSE	TRUE	FALSE	-0.267467	0.964381	0.618977	-0.269306	0.992426	0.654044	-1.03991	0.998401	0.181045	-0.00183899	0.994602	0.997551	-0.772443	1	0.315069	-0.770604	0.878024	0.343916	FALSE	FALSE	FALSE	FALSE	FALSE	FALSE
P49419	ALDH7A1	Alpha-aminoadipic semialdehyde dehydrogenase	0.75842	0.79083	0.99092	0.93059	TRUE	TRUE	TRUE	TRUE	-0.332605	0.950182	0.397647	0.352288	0.990795	0.422482	-0.334698	0.998886	0.545284	0.684893	0.978792	0.127864	-0.00209299	1	0.996967	-0.686986	0.846075	0.248291	FALSE	FALSE	FALSE	FALSE	FALSE	FALSE
P49189	ALDH9A1	4-trimethylaminobutyraldehyde dehydrogenase	0.88376	0.76933	0.93951	0.95409	TRUE	TRUE	TRUE	TRUE	-0.534684	0.933906	0.272615	-0.594425	0.988953	0.275239	-0.394173	0.998898	0.562611	-0.0597405	0.994239	0.91122	0.140511	1	0.835823	0.200252	0.933832	0.780765	FALSE	FALSE	FALSE	FALSE	FALSE	FALSE
P00883	ALDOA	Fructose-bisphosphate aldolase A	0.8872	0.85821	0.80856	0.99372	TRUE	TRUE	TRUE	TRUE	0.492588	0.918824	0.206851	0.928085	0.975435	0.0405043	1.45295	0.996373	0.0136658	0.435497	0.988246	0.314199	0.960358	1	0.08775	0.524861	0.883086	0.364642	FALSE	FALSE	FALSE	FALSE	FALSE	FALSE
P04075	ALDOA	Fructose-bisphosphate aldolase A	0.90841	0.83933	0.93659	0.9808	TRUE	TRUE	TRUE	TRUE	-0.372121	0.948704	0.382476	0.300728	0.991637	0.525752	0.89382	0.998289	0.145689	0.672848	0.982066	0.1648	1.26594	1	0.044999	0.593093	0.880568	0.354081	FALSE	FALSE	FALSE	FALSE	FALSE	FALSE
P09972	ALDOC	Fructose-bisphosphate aldolase C	0.84622	0.8877	0.93358	0.97781	TRUE	TRUE	TRUE	TRUE	0.484569	0.907607	0.173722	1.13315	0.950612	0.00829859	1.85579	0.991315	0.00119848	0.648586	0.976143	0.107135	1.37122	1	0.0109571	0.722638	0.804628	0.176105	FALSE	FALSE	FALSE	FALSE	FALSE	FALSE
P02760	AMBP	Protein AMBP	0.59515	0.50415	0.80362	0	FALSE	FALSE	TRUE	FALSE	NA	NA	NA	NA	NA	NA	NA	NA	NA	NA	NA	NA	NA	NA	NA	NA	NA	NA	NA	NA	NA	NA	NA	NA
P49418	AMPH	Amphiphysin	0.96774	0.83411	0.98382	0.93833	TRUE	TRUE	TRUE	TRUE	-1.02059	0.42036	0.00859684	-0.738443	0.980786	0.0725951	-0.939195	0.997861	0.0711718	0.282148	0.991044	0.475726	0.0813958	1	0.869914	-0.200752	0.928328	0.703812	FALSE	FALSE	FALSE	FALSE	FALSE	FALSE
Q01484	ANK2	Ankyrin-2	0.92785	0.87237	0.73726	0.95789	TRUE	TRUE	FALSE	TRUE	-0.169806	0.965305	0.640557	0.0677436	0.993385	0.867325	0.509901	0.998676	0.32658	0.23755	0.991959	0.559739	0.679707	1	0.195496	0.442157	0.894625	0.420466	FALSE	FALSE	FALSE	FALSE	FALSE	FALSE
Q12955	ANK3	Ankyrin-3	0.96216	0.55839	0.68551	0.68551	TRUE	FALSE	FALSE	FALSE	-0.0922729	0.973308	0.896502	-0.905046	0.988725	0.262157	-3.35439	0.994017	0.00322474	-0.812773	0.988199	0.312313	-3.26212	1	0.003966	-2.44934	0.537036	0.0312513	FALSE	FALSE	FALSE	FALSE	FALSE	FALSE
P04083	ANXA1	Annexin A1	0.74533	0.75789	0.62884	0.39377	FALSE	TRUE	FALSE	FALSE	-0.472062	0.91855	0.205914	-1.26241	0.940987	0.00564308	-0.48309	0.998711	0.354937	-0.790351	0.966578	0.0649659	-0.0110271	1	0.982948	0.779323	0.796468	0.165823	FALSE	FALSE	FALSE	FALSE	FALSE	FALSE
P50995	ANXA11	Annexin A11	0.87302	0.22438	0	0	TRUE	FALSE	FALSE	FALSE	NA	NA	NA	NA	NA	NA	NA	NA	NA	NA	NA	NA	NA	NA	NA	NA	NA	NA	NA	NA	NA	NA	NA	NA
P08758	ANXA5	Annexin A5	0.89174	0.8599	0.99083	0.95615	TRUE	TRUE	TRUE	TRUE	-1.03237	0.493219	0.0131435	-0.47257	0.988951	0.275118	-0.146622	0.999026	0.785649	0.559796	0.984156	0.199016	0.885743	1	0.112583	0.325948	0.915913	0.570024	FALSE	FALSE	FALSE	FALSE	FALSE	FALSE
P08133	ANXA6	Annexin A6	0.93233	0.90454	0.97814	0.9851	TRUE	TRUE	TRUE	TRUE	-1.11024	0.278903	0.00362388	-1.17329	0.939908	0.00542811	-0.54732	0.998574	0.259606	-0.0630561	0.994034	0.86721	0.562918	1	0.246749	0.625975	0.835286	0.225453	FALSE	FALSE	FALSE	FALSE	FALSE	FALSE
P20073	ANXA7	Annexin A7	0.86442	0.73787	0.83907	0.68551	TRUE	FALSE	TRUE	FALSE	0.878974	0.876762	0.117485	-0.731412	0.988238	0.236891	0.369092	0.998943	0.631396	-1.61039	0.905937	0.0147884	-0.509882	1	0.508718	1.1005	0.812381	0.186838	FALSE	FALSE	FALSE	FALSE	FALSE	FALSE
O95782	AP2A1	AP-2 complex subunit alpha-1	0.66591	0.82706	0.4731	0.68551	FALSE	TRUE	FALSE	FALSE	-0.473187	0.921308	0.215686	-0.503209	0.988261	0.238002	0.168939	0.999008	0.749747	-0.0300215	0.994377	0.942764	0.642127	1	0.234048	0.672148	0.84235	0.239999	FALSE	FALSE	FALSE	FALSE	FALSE	FALSE
O94973	AP2A2	AP-2 complex subunit alpha-2	0.98592	0.86108	0.82319	0.68551	TRUE	TRUE	TRUE	FALSE	0.284973	0.960557	0.541578	0.504481	0.989865	0.33752	0.145398	0.999044	0.824908	0.219508	0.992897	0.673231	-0.139575	1	0.831803	-0.359084	0.919852	0.607549	FALSE	FALSE	FALSE	FALSE	FALSE	FALSE
P63010	AP2B1	AP-2 complex subunit beta	0.98935	0.8468	0.92875	0	TRUE	TRUE	TRUE	FALSE	0.289993	0.964826	0.629206	0.714052	0.989248	0.293552	3.84356	0.982244	0.000216261	0.424059	0.991648	0.528651	3.55357	1	0.000467473	3.12951	0.127041	0.00234774	FALSE	FALSE	FALSE	FALSE	FALSE	FALSE
Q96CW1	AP2M1	AP-2 complex subunit mu	0.91202	0.74825	0.68551	0.42709	TRUE	FALSE	FALSE	FALSE	0.667909	0.939344	0.305826	0.841642	0.988505	0.250279	-0.863371	0.998703	0.348123	0.173733	0.993737	0.809086	-1.53128	1	0.104629	-1.70501	0.696379	0.0896016	FALSE	FALSE	FALSE	FALSE	FALSE	FALSE
P53680	AP2S1	AP-2 complex subunit sigma	0.98463	0.75203	0.92539	0	TRUE	TRUE	TRUE	FALSE	0.813132	0.90514	0.167644	1.32774	0.977541	0.0500468	4.02257	0.972667	8.53e-05	0.514605	0.990375	0.426421	3.20944	1	0.000806606	2.69483	0.208467	0.00519329	FALSE	FALSE	FALSE	FALSE	FALSE	FALSE
Q13367	AP3B2	AP-3 complex subunit beta-2	0.99171	0.70363	0.7873	0	TRUE	FALSE	TRUE	FALSE	1.63899	0.727447	0.0380284	2.17162	0.963405	0.0161549	3.68495	0.993144	0.00222771	0.532625	0.991595	0.523616	2.04596	1	0.0636789	1.51333	0.811225	0.185173	FALSE	FALSE	FALSE	FALSE	FALSE	FALSE
P02743	APCS	Serum amyloid P-component	0.8589	0.1939	0	0	TRUE	FALSE	FALSE	FALSE	NA	NA	NA	NA	NA	NA	NA	NA	NA	NA	NA	NA	NA	NA	NA	NA	NA	NA	NA	NA	NA	NA	NA	NA
P13798	APEH	Acylamino-acid-releasing enzyme	0.98142	0.60794	0.68551	0.68551	TRUE	FALSE	FALSE	FALSE	0.260715	0.958362	0.50431	-0.20036	0.992378	0.645163	-0.433818	0.998794	0.433176	-0.461075	0.98776	0.295322	-0.694533	1	0.215535	-0.233458	0.927152	0.688993	FALSE	FALSE	FALSE	FALSE	FALSE	FALSE
P51693	APLP1	Amyloid beta precursor like protein 1	0.95088	0.59956	0.68551	0	TRUE	FALSE	FALSE	FALSE	0.198744	0.97123	0.815355	2.34213	0.968258	0.0223313	3.27342	0.996296	0.012836	2.14338	0.948312	0.0345121	3.07468	1	0.0183217	0.931291	0.902713	0.468649	FALSE	FALSE	FALSE	FALSE	FALSE	FALSE
Q9HDC9	APMAP	Adipocyte plasma membrane-associated protein	0.93368	0.59195	0.82887	0.94277	TRUE	FALSE	TRUE	TRUE	0.272868	0.96262	0.581137	0.0866817	0.993414	0.874944	-0.626375	0.998733	0.373787	-0.186186	0.993313	0.735649	-0.899243	1	0.206826	-0.713057	0.877166	0.340595	FALSE	FALSE	FALSE	FALSE	FALSE	FALSE
P02652	APOA2	Apolipoprotein A-II	0.78046	0	0	0	TRUE	FALSE	FALSE	FALSE	NA	NA	NA	NA	NA	NA	NA	NA	NA	NA	NA	NA	NA	NA	NA	NA	NA	NA	NA	NA	NA	NA	NA	NA
P05090	APOD	Apolipoprotein D	0.86978	0.46826	0.82709	0.94189	TRUE	FALSE	TRUE	TRUE	0.948459	0.915521	0.196032	-0.518334	0.991596	0.519963	-0.742423	0.998824	0.466998	-1.46679	0.970889	0.0796459	-1.69088	1	0.107707	-0.224088	0.937196	0.834905	FALSE	FALSE	FALSE	FALSE	FALSE	FALSE
P02649	APOE	Apolipoprotein E	0.88141	0.51099	0.68551	0.68551	TRUE	FALSE	FALSE	FALSE	0.426233	0.952278	0.421014	0.219726	0.992704	0.708635	0.0507617	0.999096	0.945483	-0.206507	0.993248	0.725372	-0.375471	1	0.614249	-0.168964	0.936917	0.830182	FALSE	FALSE	FALSE	FALSE	FALSE	FALSE
P02749	APOH	Beta-2-glycoprotein 1	0.88132	0	0	0	TRUE	FALSE	FALSE	FALSE	NA	NA	NA	NA	NA	NA	NA	NA	NA	NA	NA	NA	NA	NA	NA	NA	NA	NA	NA	NA	NA	NA	NA	NA
P05067	APP	Amyloid-beta precursor protein	0.97437	0.8264	0.90293	0.68551	TRUE	TRUE	TRUE	FALSE	0.352077	0.954142	0.443867	0.430622	0.990605	0.402994	-0.452948	0.99884	0.485478	0.0785449	0.994084	0.877609	-0.805025	1	0.221677	-0.88357	0.824999	0.206668	FALSE	FALSE	FALSE	FALSE	FALSE	FALSE
Q9UKG1	APPL1	DCC-interacting protein 13-alpha	0.90249	0.35728	0.68551	0	TRUE	FALSE	FALSE	FALSE	NA	NA	NA	NA	NA	NA	NA	NA	NA	NA	NA	NA	NA	NA	NA	NA	NA	NA	NA	NA	NA	NA	NA	NA
P29972	AQP1	Aquaporin-1	0.87912	0.8812	0.68551	0	TRUE	TRUE	FALSE	FALSE	-0.0991043	0.973931	0.923455	1.50423	0.987441	0.202371	2.46452	0.998098	0.103702	1.60333	0.982793	0.175502	2.56363	1	0.0914693	0.960294	0.912065	0.536953	FALSE	FALSE	FALSE	FALSE	FALSE	FALSE
P55087	AQP4	Aquaporin-4	0.91541	0.45198	0.68551	0	TRUE	FALSE	FALSE	FALSE	NA	NA	NA	NA	NA	NA	NA	NA	NA	NA	NA	NA	NA	NA	NA	NA	NA	NA	NA	NA	NA	NA	NA	NA
P61204;P84077	ARF3	ADP-ribosylation factor 3;ADP-ribosylation factor 1	0.86049	0.79856	0.97826	0.91608	TRUE	TRUE	TRUE	TRUE	NA	NA	NA	NA	NA	NA	NA	NA	NA	NA	NA	NA	NA	NA	NA	NA	NA	NA	NA	NA	NA	NA	NA	NA
P18085	ARF4	ADP-ribosylation factor 4	0.95751	0.67275	0.68551	0	TRUE	FALSE	FALSE	FALSE	0.268834	0.963922	0.608721	2.07526	0.904165	0.00203928	2.51733	0.993727	0.00283355	1.80643	0.815845	0.00573211	2.24849	1	0.00639663	0.442066	0.916456	0.574963	FALSE	FALSE	FALSE	FALSE	FALSE	FALSE
P52565	ARHGDIA	Rho GDP-dissociation inhibitor 1	0.97077	0.75205	0.92854	0.97497	TRUE	TRUE	TRUE	TRUE	-0.104992	0.969836	0.767542	-0.299674	0.991074	0.453506	-0.612044	0.998521	0.231904	-0.194682	0.992529	0.624707	-0.507052	1	0.318976	-0.31237	0.914683	0.559089	FALSE	FALSE	FALSE	FALSE	FALSE	FALSE
O75915	ARL6IP5	PRA1 family protein 3	0.90221	0.74831	0.68551	0	TRUE	FALSE	FALSE	FALSE	0.352343	0.96864	0.730136	1.89465	0.983781	0.109127	2.92678	0.997672	0.0542799	1.54231	0.983491	0.186923	2.57444	1	0.0868951	1.03213	0.907618	0.50254	FALSE	FALSE	FALSE	FALSE	FALSE	FALSE
Q92747	ARPC1A	Actin-related protein 2/3 complex subunit 1A	0.94722	0.76391	0.96387	0.68551	TRUE	TRUE	TRUE	FALSE	-0.287199	0.965994	0.657468	-0.462252	0.991628	0.524479	-0.699081	0.998807	0.447787	-0.175053	0.993735	0.808622	-0.411881	1	0.652984	-0.236828	0.935512	0.80705	FALSE	FALSE	FALSE	FALSE	FALSE	FALSE
O15144	ARPC2	Actin-related protein 2/3 complex subunit 2	0.95845	0.61963	0.83628	0.68551	TRUE	FALSE	TRUE	FALSE	0.651622	0.855858	0.0947483	0.277063	0.991531	0.511031	-0.764849	0.99834	0.160529	-0.37456	0.989559	0.376631	-1.41647	1	0.0142789	-1.04191	0.673376	0.076374	FALSE	FALSE	FALSE	FALSE	FALSE	FALSE
O15145	ARPC3	Actin-related protein 2/3 complex subunit 3	0.92759	0.88184	0.96855	0.98826	TRUE	TRUE	TRUE	TRUE	-0.705289	0.825682	0.0727353	-0.0813101	0.993304	0.846447	0.792491	0.998295	0.147331	0.623979	0.980824	0.148885	1.49778	1	0.0103259	0.873801	0.763966	0.132869	FALSE	FALSE	FALSE	FALSE	FALSE	FALSE
P59998	ARPC4	Actin-related protein 2/3 complex subunit 4	0.98901	0.82721	0.96671	0.30479	TRUE	TRUE	TRUE	FALSE	-0.314714	0.950531	0.401383	0.171941	0.992559	0.679482	0.608447	0.998566	0.255286	0.486655	0.986352	0.249958	0.923161	1	0.0914268	0.436506	0.897591	0.437136	FALSE	FALSE	FALSE	FALSE	FALSE	FALSE
P49407	ARRB1	Beta-arrestin-1	0.97756	0.76104	0.81649	0	TRUE	TRUE	TRUE	FALSE	0.74582	0.920575	0.21301	1.58229	0.969614	0.0246897	2.91469	0.993089	0.00218054	0.83647	0.984782	0.211638	2.16887	1	0.0160716	1.3324	0.773587	0.141491	FALSE	FALSE	FALSE	FALSE	FALSE	FALSE
P15289	ARSA	Arylsulfatase A	0.80377	0.8572	0	0	TRUE	TRUE	FALSE	FALSE	-1.14109	0.910506	0.181363	1.41458	0.985393	0.140534	1.41458	0.998535	0.23868	2.55567	0.89193	0.0121723	2.55567	1	0.0408928	0	0.945566	1	FALSE	FALSE	FALSE	FALSE	FALSE	FALSE
Q13510	ASAH1	Acid ceramidase	0.83305	0.76009	0.80591	0.9827	TRUE	TRUE	TRUE	TRUE	0.021089	0.974709	0.959018	0.347445	0.991066	0.452517	0.214052	0.998989	0.712793	0.326356	0.991097	0.480013	0.192963	1	0.73992	-0.133393	0.93682	0.82856	FALSE	FALSE	FALSE	FALSE	FALSE	FALSE
Q53RT3	ASPRV1	Retroviral-like aspartic protease 1	0.56292	0.71192	0.7681	0.81173	FALSE	FALSE	TRUE	TRUE	0.100583	0.973708	0.913638	-0.06153	0.993694	0.952676	-1.98948	0.998272	0.14127	-0.162113	0.994075	0.875786	-2.09006	1	0.123368	-1.92795	0.805165	0.176817	FALSE	FALSE	FALSE	FALSE	FALSE	FALSE
Q7L266	ASRGL1	Isoaspartyl peptidase/L-asparaginase	0.93408	0.68608	0.89283	0.77321	TRUE	FALSE	TRUE	TRUE	0.142329	0.970482	0.789075	-0.456584	0.991009	0.446022	-1.40424	0.997889	0.0742631	-0.598914	0.988392	0.32029	-1.54657	1	0.0513512	-0.947658	0.844009	0.243636	FALSE	FALSE	FALSE	FALSE	FALSE	FALSE
Q8WXF7	ATL1	Atlastin-1	0.96186	0.84057	0.81741	0	TRUE	TRUE	TRUE	FALSE	-0.695296	0.962413	0.576949	2.00514	0.986155	0.159951	4.55006	0.996622	0.0169584	2.70043	0.96619	0.0638737	5.24536	1	0.0071433	2.54493	0.809326	0.182488	FALSE	FALSE	FALSE	FALSE	FALSE	FALSE
P05023	ATP1A1	Sodium/potassium-transporting ATPase subunit alpha-1	0.83773	0.82077	0.98575	0.9833	TRUE	TRUE	TRUE	TRUE	-0.401663	0.921617	0.216827	-0.687841	0.979949	0.0655508	-0.0893199	0.999052	0.842784	-0.286178	0.990361	0.42542	0.312343	1	0.490634	0.598521	0.832311	0.219747	FALSE	FALSE	FALSE	FALSE	FALSE	FALSE
P50993	ATP1A2	Sodium/potassium-transporting ATPase subunit alpha-2	0.89243	0.8148	0.97724	0.9724	TRUE	TRUE	TRUE	TRUE	-0.710555	0.698288	0.0325328	-0.68746	0.97924	0.0603343	-0.598361	0.998412	0.18486	0.0230947	0.994396	0.947086	0.112194	1	0.79898	0.089099	0.937997	0.848717	FALSE	FALSE	FALSE	FALSE	FALSE	FALSE
P13637	ATP1A3	Sodium/potassium-transporting ATPase subunit alpha-3	0.86291	0.88346	0.95233	0.94082	TRUE	TRUE	TRUE	TRUE	0.538501	0.894332	0.14485	0.399872	0.989699	0.324884	0.889081	0.998026	0.0920429	-0.138629	0.993276	0.729771	0.350579	1	0.491971	0.489208	0.883919	0.368251	FALSE	FALSE	FALSE	FALSE	FALSE	FALSE
P05026	ATP1B1	Sodium/potassium-transporting ATPase subunit beta-1	0.78961	0.92937	0.96414	0.96206	TRUE	TRUE	TRUE	TRUE	0.026719	0.974724	0.95973	-0.47834	0.9908	0.422994	0.741497	0.998678	0.328295	-0.505059	0.98993	0.39804	0.714778	1	0.345572	1.21984	0.768086	0.136461	FALSE	FALSE	FALSE	FALSE	FALSE	FALSE
P54709	ATP1B3	Sodium/potassium-transporting ATPase subunit beta-3	0.91209	0.63118	0.68551	0	TRUE	FALSE	FALSE	FALSE	0.735576	0.958822	0.511749	1.83778	0.985857	0.151944	3.19173	0.997678	0.0547235	1.10221	0.989646	0.381476	2.45616	1	0.131326	1.35395	0.894934	0.422151	FALSE	FALSE	FALSE	FALSE	FALSE	FALSE
P16615	ATP2A2	Sarcoplasmic/endoplasmic reticulum calcium ATPase 2	0.53154	0.81452	0.46159	0.76017	FALSE	TRUE	FALSE	TRUE	-0.975965	0.730683	0.0387219	-0.268473	0.99206	0.59017	-0.476613	0.998811	0.451483	0.707492	0.982118	0.165528	0.499352	1	0.430545	-0.20814	0.932092	0.754984	FALSE	FALSE	FALSE	FALSE	FALSE	FALSE
P20020	ATP2B1	Plasma membrane calcium-transporting ATPase 1	0.84666	0.85713	0.98262	0.97121	TRUE	TRUE	TRUE	TRUE	-0.40628	0.935186	0.279856	-0.475013	0.988671	0.259159	-0.416688	0.998791	0.429653	-0.0687332	0.994038	0.868014	-0.0104079	1	0.984122	0.0583253	0.941628	0.91627	FALSE	FALSE	FALSE	FALSE	FALSE	FALSE
Q01814	ATP2B2	Plasma membrane calcium-transporting ATPase 2	0.86217	0.77733	0.99093	0.20298	TRUE	TRUE	TRUE	FALSE	-0.00208268	0.975464	0.995761	-0.211855	0.992293	0.629967	-0.510381	0.998721	0.362895	-0.209772	0.992597	0.633314	-0.508298	1	0.364811	-0.298526	0.920389	0.612976	FALSE	FALSE	FALSE	FALSE	FALSE	FALSE
Q16720	ATP2B3	Plasma membrane calcium-transporting ATPase 3	0.96808	0.5992	0.68551	0	TRUE	FALSE	FALSE	FALSE	1.48089	0.777703	0.0514291	3.62615	0.72407	0.000234217	4.33132	0.986585	0.000411853	2.14526	0.904696	0.0145189	2.85043	1	0.0108422	0.705168	0.909457	0.516308	FALSE	FALSE	FALSE	FALSE	FALSE	FALSE
P25705	ATP5F1A	ATP synthase subunit alpha, mitochondrial	0.81636	0.80185	0.79813	0.95775	TRUE	TRUE	TRUE	TRUE	0.456683	0.924	0.226023	0.458977	0.988943	0.274602	-0.135204	0.999031	0.796001	0.00229427	0.994594	0.995568	-0.591887	1	0.265661	-0.594181	0.862551	0.291243	FALSE	FALSE	FALSE	FALSE	FALSE	FALSE
P06576	ATP5F1B	ATP synthase subunit beta, mitochondrial	0.89704	0.85171	0.81612	0.95472	TRUE	TRUE	TRUE	TRUE	0.549203	0.886373	0.13124	0.453224	0.988658	0.258448	0.179597	0.998992	0.718975	-0.0959784	0.99373	0.807635	-0.369606	1	0.4616	-0.273628	0.919692	0.605942	FALSE	FALSE	FALSE	FALSE	FALSE	FALSE
P36542	ATP5F1C	ATP synthase subunit gamma, mitochondrial	0.94364	0.56745	0	0	TRUE	FALSE	FALSE	FALSE	1.19846	0.897568	0.151092	2.9801	0.927671	0.0036622	2.9801	0.996606	0.0167151	1.78164	0.96531	0.0615106	1.78164	1	0.132381	0	0.945566	1	FALSE	FALSE	FALSE	FALSE	FALSE	FALSE
P30049	ATP5F1D	ATP synthase subunit delta, mitochondrial	0.92181	0.36078	0.39571	0.99189	TRUE	FALSE	FALSE	TRUE	0.90234	0.871353	0.11078	0.559112	0.990197	0.365018	0.771389	0.998672	0.324181	-0.343228	0.992106	0.575421	-0.130951	1	0.865313	0.212277	0.934789	0.795566	FALSE	FALSE	FALSE	FALSE	FALSE	FALSE
P56385	ATP5ME	ATP synthase subunit e, mitochondrial	0.92093	0.41335	0	0.68551	TRUE	FALSE	FALSE	FALSE	0.14902	0.97258	0.866609	3.29044	0.925271	0.00341941	1.47043	0.998556	0.249889	3.14142	0.791516	0.00479104	1.32141	1	0.29943	-1.82001	0.80912	0.182202	FALSE	FALSE	FALSE	FALSE	FALSE	FALSE
P56134	ATP5MF	ATP synthase subunit f, mitochondrial	0.92579	0.84216	0.68551	0	TRUE	TRUE	FALSE	FALSE	1.89758	0.867024	0.105866	3.00229	0.970708	0.0268689	4.01721	0.996806	0.0201194	1.1047	0.989746	0.387151	2.11962	1	0.195468	1.01492	0.913806	0.551508	FALSE	FALSE	FALSE	FALSE	FALSE	FALSE
O75947	ATP5PD	ATP synthase subunit d, mitochondrial	0.90988	0.5852	0.68551	0.68551	TRUE	FALSE	FALSE	FALSE	0.418522	0.956499	0.475978	-0.489881	0.991094	0.455831	-0.16687	0.999051	0.839692	-0.908404	0.982732	0.174556	-0.585393	1	0.480759	0.323011	0.928988	0.712366	FALSE	FALSE	FALSE	FALSE	FALSE	FALSE
P48047	ATP5PO	ATP synthase subunit O, mitochondrial	0.98792	0.63331	0.92929	0.68551	TRUE	FALSE	TRUE	FALSE	0.291657	0.960503	0.540605	0.0896798	0.993379	0.865711	-0.557638	0.998771	0.410103	-0.201977	0.993107	0.703763	-0.849295	1	0.215228	-0.647318	0.883911	0.368215	FALSE	FALSE	FALSE	FALSE	FALSE	FALSE
Q93050	ATP6V0A1	V-type proton ATPase 116 kDa subunit a 1	0.97404	0.91078	0.98497	0.92019	TRUE	TRUE	TRUE	TRUE	-0.954188	0.451401	0.0107335	-0.949321	0.967312	0.0208802	0.172089	0.998993	0.72114	0.0048673	0.994571	0.989793	1.12628	1	0.0289014	1.12141	0.57564	0.038809	FALSE	FALSE	FALSE	FALSE	FALSE	FALSE
P61421	ATP6V0D1	V-type proton ATPase subunit d 1	0.95043	0.75037	0.9448	0.92064	TRUE	TRUE	TRUE	TRUE	-0.313198	0.955824	0.466382	-1.25784	0.962673	0.0154493	-0.149153	0.999035	0.804979	-0.944643	0.964659	0.0598569	0.164045	1	0.785998	1.10869	0.709062	0.0959712	FALSE	FALSE	FALSE	FALSE	FALSE	FALSE
P38606	ATP6V1A	V-type proton ATPase catalytic subunit A	0.87869	0.86118	0.99083	0.97362	TRUE	TRUE	TRUE	TRUE	0.551961	0.848323	0.0883035	0.488627	0.986525	0.170782	1.14432	0.996594	0.0165377	-0.0633336	0.993976	0.855391	0.592363	1	0.188354	0.655696	0.800434	0.1707	FALSE	FALSE	FALSE	FALSE	FALSE	FALSE
P21281	ATP6V1B2	V-type proton ATPase subunit B, brain isoform	0.89635	0.83884	0.8604	0.93834	TRUE	TRUE	TRUE	TRUE	0.747237	0.808108	0.0635138	1.02742	0.970119	0.0256619	2.04034	0.991455	0.00124955	0.280184	0.99151	0.515784	1.2931	1	0.0263133	1.01292	0.69889	0.0908134	FALSE	FALSE	FALSE	FALSE	FALSE	FALSE
P21283	ATP6V1C1	V-type proton ATPase subunit C 1	0.98871	0.71112	0.81931	0	TRUE	FALSE	TRUE	FALSE	1.29174	0.883869	0.127401	2.26217	0.968117	0.0221058	4.40195	0.991199	0.00115861	0.970432	0.987809	0.29712	3.11022	1	0.01397	2.13978	0.706258	0.0945088	FALSE	FALSE	FALSE	FALSE	FALSE	FALSE
Q9Y5K8	ATP6V1D	V-type proton ATPase subunit D	0.92237	0.89373	0.67851	0.93848	TRUE	TRUE	FALSE	TRUE	0.0988041	0.969672	0.762222	-0.845248	0.972172	0.0302605	0.469467	0.998661	0.315634	-0.944052	0.915147	0.0170911	0.370663	1	0.425753	1.31472	0.389198	0.0138279	FALSE	FALSE	FALSE	FALSE	FALSE	FALSE
P36543	ATP6V1E1	V-type proton ATPase subunit E 1	0.98082	0.81565	0.65092	0.95704	TRUE	TRUE	FALSE	TRUE	-0.341382	0.932164	0.263273	-0.240646	0.991261	0.475961	-0.110488	0.99903	0.794595	0.100737	0.993485	0.764057	0.230894	1	0.58759	0.130158	0.933285	0.772511	FALSE	FALSE	FALSE	FALSE	FALSE	FALSE
Q16864	ATP6V1F	V-type proton ATPase subunit F	0.89333	0.79536	0.33595	0.68551	TRUE	TRUE	FALSE	FALSE	0.0380209	0.974191	0.93508	-0.820516	0.984825	0.12815	-0.571251	0.998753	0.391704	-0.858537	0.976901	0.112455	-0.609271	1	0.36163	0.249265	0.929737	0.722281	FALSE	FALSE	FALSE	FALSE	FALSE	FALSE
O75348	ATP6V1G1	V-type proton ATPase subunit G 1	0.97033	0.41946	0.68551	0	TRUE	FALSE	FALSE	FALSE	2.11638	0.395588	0.00730382	2.35564	0.948335	0.00752156	3.36606	0.993989	0.00318469	0.239261	0.993482	0.763544	1.24968	1	0.223269	1.01042	0.879323	0.349045	FALSE	FALSE	FALSE	FALSE	FALSE	FALSE
O95670	ATP6V1G2	V-type proton ATPase subunit G 2	0.86873	0.85122	0.64186	0.68551	TRUE	TRUE	FALSE	FALSE	0.670888	0.900832	0.157867	1.66785	0.931959	0.00416646	0.983536	0.998282	0.143995	0.996958	0.966865	0.0657942	0.312648	1	0.633195	-0.68431	0.874242	0.329667	FALSE	FALSE	FALSE	FALSE	FALSE	FALSE
Q9UI12	ATP6V1H	V-type proton ATPase subunit H	0.90035	0.85147	0.96863	0.94802	TRUE	TRUE	TRUE	TRUE	-0.479623	0.934618	0.276602	-0.600465	0.987983	0.225015	-0.20321	0.999003	0.740682	-0.120842	0.993706	0.803278	0.276413	1	0.653012	0.397255	0.912841	0.54336	FALSE	FALSE	FALSE	FALSE	FALSE	FALSE
Q9Y2Q0	ATP8A1	Phospholipid-transporting ATPase IA	0.93343	0.75061	0.68551	0	TRUE	TRUE	FALSE	FALSE	0.127088	0.97298	0.882823	2.46091	0.965481	0.0184402	3.62129	0.995546	0.00743796	2.33382	0.934034	0.0243806	3.4942	1	0.00936031	1.16038	0.885397	0.374802	FALSE	FALSE	FALSE	FALSE	FALSE	FALSE
P25311	AZGP1	Zinc-alpha-2-glycoprotein	0.58644	0.56982	0.70632	0.99337	FALSE	FALSE	FALSE	TRUE	0.728536	0.838477	0.0809164	-0.0743854	0.993387	0.867827	-1.59413	0.996019	0.0103479	-0.802921	0.972134	0.0849789	-2.32266	1	0.000570201	-1.51974	0.449955	0.0191735	FALSE	FALSE	FALSE	FALSE	FALSE	FALSE
P46379	BAG6	Large proline-rich protein BAG6	0.96426	0.80501	0.90345	0	TRUE	TRUE	TRUE	FALSE	0.522112	0.955996	0.468796	0.795634	0.98972	0.326449	3.46878	0.993587	0.00266814	0.273522	0.993295	0.732793	2.94667	1	0.00845621	2.67315	0.466447	0.0210592	FALSE	FALSE	FALSE	FALSE	FALSE	FALSE
P80723	BASP1	Brain acid soluble protein 1	0.92379	0.50727	0.68551	0.7948	TRUE	FALSE	FALSE	TRUE	0.588389	0.957575	0.491994	-0.647995	0.991437	0.498411	0.602242	0.998934	0.617855	-1.23638	0.984404	0.203856	0.0138521	1	0.990812	1.25024	0.875296	0.333538	FALSE	FALSE	FALSE	FALSE	FALSE	FALSE
P50895	BCAM	Basal cell adhesion molecule	0.98288	0.77067	0.68551	0	TRUE	TRUE	FALSE	FALSE	1.90173	0.627455	0.023136	3.25472	0.88071	0.0013031	4.03238	0.99214	0.00155138	1.35298	0.979207	0.131733	2.13064	1	0.0648934	0.777664	0.90828	0.507426	FALSE	FALSE	FALSE	FALSE	FALSE	FALSE
Q96GW7	BCAN	Brevican core protein	0.82755	0.87747	0.99189	0.96323	TRUE	TRUE	TRUE	TRUE	-0.789356	0.805038	0.0620969	-0.62292	0.986736	0.177413	0.164928	0.999019	0.772301	0.166436	0.993162	0.712056	0.954284	1	0.106294	0.787848	0.822394	0.202307	FALSE	FALSE	FALSE	FALSE	FALSE	FALSE
Q9BXK5	BCL2L13	Bcl-2-like protein 13	0.90854	0.78	0	0	TRUE	TRUE	FALSE	FALSE	-0.190044	0.968987	0.740645	1.69118	0.962583	0.0153653	1.69118	0.997588	0.0485192	1.88123	0.854901	0.00804514	1.88123	1	0.0301146	0	0.945566	1	FALSE	FALSE	FALSE	FALSE	FALSE	FALSE
Q9BUT1	BDH2	Dehydrogenase/reductase SDR family member 6	0.85272	0.80152	0.72504	0.96617	TRUE	TRUE	FALSE	TRUE	0.135694	0.972234	0.852952	-0.187507	0.993194	0.818847	0.999527	0.998693	0.340314	-0.323201	0.993038	0.693435	0.863833	1	0.408386	1.18703	0.861175	0.287205	FALSE	FALSE	FALSE	FALSE	FALSE	FALSE
O00499	BIN1	Myc box-dependent-interacting protein 1	0.81675	0.85925	0.98594	0.99056	TRUE	TRUE	TRUE	TRUE	-0.45192	0.924101	0.226425	-0.170308	0.992551	0.677949	-0.549365	0.998632	0.2959	0.281612	0.991266	0.494103	-0.0974452	1	0.850717	-0.379057	0.906254	0.49271	FALSE	FALSE	FALSE	FALSE	FALSE	FALSE
P53004	BLVRA	Biliverdin reductase A	0.89673	0.82222	0.97599	0.83416	TRUE	TRUE	TRUE	TRUE	0.431442	0.947445	0.37033	1.48252	0.956885	0.0111922	1.71422	0.996732	0.0187541	1.05108	0.964911	0.0604883	1.28277	1	0.0692061	0.231697	0.931462	0.746003	FALSE	FALSE	FALSE	FALSE	FALSE	FALSE
P30043	BLVRB	Flavin reductase (NADPH)	0.85415	0.56059	0.68551	0	TRUE	FALSE	FALSE	FALSE	NA	NA	NA	NA	NA	NA	NA	NA	NA	NA	NA	NA	NA	NA	NA	NA	NA	NA	NA	NA	NA	NA	NA	NA
Q9NP55	BPIFA1	BPI fold-containing family A member 1	0.87145	0.27227	0.68551	0.81762	TRUE	FALSE	FALSE	TRUE	0.387374	0.949553	0.391069	0.149758	0.992964	0.764717	-1.16013	0.99793	0.0790609	-0.237617	0.992615	0.635517	-1.5475	1	0.0230626	-1.30988	0.649129	0.0629757	FALSE	FALSE	FALSE	FALSE	FALSE	FALSE
Q8TDL5	BPIFB1	BPI fold-containing family B member 1	0.79718	0.21007	0.68551	0.9301	TRUE	FALSE	FALSE	TRUE	0.804537	0.845497	0.0860722	1.01224	0.978563	0.0558952	1.54985	0.996964	0.0235284	0.2077	0.992945	0.680056	0.745308	1	0.249778	0.537608	0.896209	0.429231	FALSE	FALSE	FALSE	FALSE	FALSE	FALSE
Q8WUW1	BRK1	Protein BRICK1	0.96582	0.5953	0.8203	0	TRUE	FALSE	TRUE	FALSE	0.780134	0.9116	0.184397	1.43456	0.974063	0.0356559	2.40181	0.995572	0.0075683	0.654422	0.988244	0.314131	1.62167	1	0.0574747	0.96725	0.854513	0.268892	FALSE	FALSE	FALSE	FALSE	FALSE	FALSE
P35613	BSG	Basigin	0.95112	0.69265	0.83659	0.99347	TRUE	FALSE	TRUE	TRUE	0.266907	0.962811	0.585053	-1.14833	0.976779	0.046247	0.182025	0.999029	0.791659	-1.41523	0.913663	0.0166796	-0.0848819	1	0.901888	1.33035	0.680321	0.0810728	FALSE	FALSE	FALSE	FALSE	FALSE	FALSE
Q9UPA5	BSN	Protein bassoon	0.85319	0.50147	0.68551	0	TRUE	FALSE	FALSE	FALSE	NA	NA	NA	NA	NA	NA	NA	NA	NA	NA	NA	NA	NA	NA	NA	NA	NA	NA	NA	NA	NA	NA	NA	NA
Q9H0W9	C11orf54	Ester hydrolase C11orf54	0.702	0.70277	0.62335	0.97576	FALSE	FALSE	FALSE	TRUE	-0.0297357	0.974171	0.934198	-0.130403	0.992882	0.746389	-0.42327	0.998772	0.410403	-0.100667	0.993703	0.802736	-0.393534	1	0.443477	-0.292867	0.917982	0.589237	FALSE	FALSE	FALSE	FALSE	FALSE	FALSE
P02746	C1QB	Complement C1q subcomponent subunit B	0.87109	0.60968	0.68551	0	TRUE	FALSE	FALSE	FALSE	NA	NA	NA	NA	NA	NA	NA	NA	NA	NA	NA	NA	NA	NA	NA	NA	NA	NA	NA	NA	NA	NA	NA	NA
Q07021	C1QBP	Complement component 1 Q subcomponent-binding protein, mitochondrial	0.89495	0.43875	0.68551	0	TRUE	FALSE	FALSE	FALSE	NA	NA	NA	NA	NA	NA	NA	NA	NA	NA	NA	NA	NA	NA	NA	NA	NA	NA	NA	NA	NA	NA	NA	NA
P02747	C1QC	Complement C1q subcomponent subunit C	0.90346	0.73593	0.68551	0	TRUE	FALSE	FALSE	FALSE	-0.151873	0.973439	0.902062	1.91563	0.986694	0.176071	3.16076	0.997959	0.0827249	2.06751	0.980563	0.145871	3.31264	1	0.0700873	1.24513	0.907792	0.503813	FALSE	FALSE	FALSE	FALSE	FALSE	FALSE
P01024	C3	Complement C3	0.90479	0.86283	0.97745	0.99347	TRUE	TRUE	TRUE	TRUE	-0.222246	0.960567	0.541755	-0.535915	0.987283	0.196378	-0.262961	0.998929	0.609149	-0.313668	0.990608	0.442561	-0.0407144	1	0.936676	0.272954	0.920758	0.616762	FALSE	FALSE	FALSE	FALSE	FALSE	FALSE
P0C0L4	C4A	Complement C4-A	0.86858	0.87717	0.59308	0.68551	TRUE	TRUE	FALSE	FALSE	-0.170882	0.965474	0.644634	-0.440577	0.989249	0.293585	0.847333	0.998169	0.11727	-0.269696	0.991515	0.516226	1.01821	1	0.0635299	1.28791	0.528691	0.0298653	FALSE	FALSE	FALSE	FALSE	FALSE	FALSE
P01031	C5	Complement C5	0.36488	0.94419	0.68551	0.68551	FALSE	TRUE	FALSE	FALSE	-0.387667	0.956889	0.481679	-1.05913	0.982899	0.096048	-2.03124	0.996544	0.015818	-0.671463	0.987335	0.280276	-1.64357	1	0.044956	-0.972108	0.844721	0.245224	FALSE	FALSE	FALSE	FALSE	FALSE	FALSE
P10643	C7	Complement component C7	0.77211	0.79593	0	0	TRUE	TRUE	FALSE	FALSE	NA	NA	NA	NA	NA	NA	NA	NA	NA	NA	NA	NA	NA	NA	NA	NA	NA	NA	NA	NA	NA	NA	NA	NA
P02748	C9	Complement component C9	0.76161	0.80317	0.68551	0	TRUE	TRUE	FALSE	FALSE	NA	NA	NA	NA	NA	NA	NA	NA	NA	NA	NA	NA	NA	NA	NA	NA	NA	NA	NA	NA	NA	NA	NA	NA
P00915	CA1	Carbonic anhydrase 1	0.95162	0.32201	0.8311	0	TRUE	FALSE	TRUE	FALSE	1.34285	0.909772	0.179372	1.31615	0.988229	0.236479	3.13484	0.99728	0.0331526	-0.0267	0.994534	0.980456	1.79199	1	0.203942	1.81869	0.834165	0.223275	FALSE	FALSE	FALSE	FALSE	FALSE	FALSE
P00918	CA2	Carbonic anhydrase 2	0.94244	0.84997	0.98795	0.9746	TRUE	TRUE	TRUE	TRUE	-0.801079	0.807458	0.0632097	0.268406	0.991873	0.560485	-0.317856	0.998913	0.585538	1.06949	0.942293	0.0294849	0.483223	1	0.409631	-0.586262	0.87881	0.347004	FALSE	FALSE	FALSE	FALSE	FALSE	FALSE
Q8N3J6	CADM2	Cell adhesion molecule 2	0.95564	0.89264	0.91238	0.93413	TRUE	TRUE	TRUE	TRUE	0.557719	0.929275	0.248951	0.355184	0.991494	0.506027	0.590962	0.998744	0.383832	-0.202535	0.993105	0.70334	0.0332438	1	0.960509	0.235778	0.931102	0.740947	FALSE	FALSE	FALSE	FALSE	FALSE	FALSE
Q8N126	CADM3	Cell adhesion molecule 3	0.8897	0.89282	0.98304	0.94387	TRUE	TRUE	TRUE	TRUE	0.0685507	0.973174	0.890849	0.729782	0.98742	0.201554	2.64657	0.991577	0.0012966	0.661232	0.986183	0.245305	2.57802	1	0.0016158	1.91679	0.440926	0.0182342	FALSE	FALSE	FALSE	FALSE	FALSE	FALSE
Q8NFZ8	CADM4	Cell adhesion molecule 4	0.97348	0.77337	0.98569	0.95256	TRUE	TRUE	TRUE	TRUE	-0.620537	0.907414	0.173233	-1.42019	0.953443	0.00944551	-0.855317	0.998409	0.183837	-0.799654	0.977815	0.119486	-0.23478	1	0.708891	0.564874	0.890872	0.400836	FALSE	FALSE	FALSE	FALSE	FALSE	FALSE
Q9ULU8	CADPS	Calcium-dependent secretion activator 1	0.97644	0.77748	0	0	TRUE	TRUE	FALSE	FALSE	1.2203	0.86042	0.0990424	3.01314	0.874987	0.00118468	3.01314	0.995466	0.00706322	1.79285	0.948382	0.0345795	1.79285	1	0.0875029	0	0.945566	1	FALSE	FALSE	FALSE	FALSE	FALSE	FALSE
P22676	CALB2	Calretinin	0.91178	0.60807	0.68551	0.68551	TRUE	FALSE	FALSE	FALSE	0.176538	0.970881	0.802919	-0.435739	0.992016	0.582928	-1.51607	0.998272	0.141327	-0.612277	0.990603	0.442228	-1.6926	1	0.103001	-1.08033	0.870081	0.315084	FALSE	FALSE	FALSE	FALSE	FALSE	FALSE
P0DP23;P0DP24;P0DP25	CALM1	Calmodulin-1;Calmodulin-2;Calmodulin-3	0.88114	0.71019	0.98018	0.99405	TRUE	FALSE	TRUE	TRUE	NA	NA	NA	NA	NA	NA	NA	NA	NA	NA	NA	NA	NA	NA	NA	NA	NA	NA	NA	NA	NA	NA	NA	NA
P27482	CALML3	Calmodulin-like protein 3	0.89043	0.4312	0.68551	0.97847	TRUE	FALSE	FALSE	TRUE	1.04362	0.88024	0.122168	0.266562	0.992736	0.715358	-0.751541	0.998781	0.419731	-0.777061	0.987734	0.294362	-1.79516	1	0.0640238	-1.0181	0.867165	0.305484	FALSE	FALSE	FALSE	FALSE	FALSE	FALSE
Q9NZT1	CALML5	Calmodulin-like protein 5	0.67147	0.70108	0.61585	0.97363	FALSE	FALSE	FALSE	TRUE	-0.0826002	0.972585	0.866799	-0.271276	0.992256	0.623274	-2.03813	0.995689	0.0081806	-0.188676	0.993291	0.732166	-1.95553	1	0.0106168	-1.76685	0.503245	0.0259037	FALSE	FALSE	FALSE	FALSE	FALSE	FALSE
P27797	CALR	Calreticulin	0.92331	0.80568	0.96626	0.68551	TRUE	TRUE	TRUE	FALSE	0.685781	0.918319	0.205128	1.0587	0.982107	0.0861275	0.33139	0.998959	0.658696	0.372916	0.991669	0.530668	-0.354391	1	0.636793	-0.727307	0.883162	0.364969	FALSE	FALSE	FALSE	FALSE	FALSE	FALSE
Q9UQM7	CAMK2A	Calcium/calmodulin-dependent protein kinase type II subunit alpha	0.7846	0.85932	0.88225	0.9742	TRUE	TRUE	TRUE	TRUE	-0.122969	0.969289	0.750038	-0.186805	0.992486	0.665478	0.0177951	0.999107	0.973956	-0.0638366	0.994106	0.882268	0.140764	1	0.796404	0.2046	0.929857	0.723884	FALSE	FALSE	FALSE	FALSE	FALSE	FALSE
Q13554	CAMK2B	Calcium/calmodulin-dependent protein kinase type II subunit beta	0.9146	0.85472	0.9667	0.99111	TRUE	TRUE	TRUE	TRUE	0.400922	0.953688	0.438105	-0.346887	0.991785	0.547111	0.0276996	0.999106	0.969526	-0.747809	0.984328	0.202351	-0.373222	1	0.608053	0.374587	0.92177	0.627337	FALSE	FALSE	FALSE	FALSE	FALSE	FALSE
Q13557	CAMK2D	Calcium/calmodulin-dependent protein kinase type II subunit delta	0.8691	0.51936	0.83959	0.68551	TRUE	FALSE	TRUE	FALSE	0.333107	0.956109	0.470401	-0.390497	0.991039	0.449464	-0.830405	0.998474	0.21001	-0.723604	0.982362	0.169019	-1.16351	1	0.0851498	-0.439908	0.910502	0.524418	FALSE	FALSE	FALSE	FALSE	FALSE	FALSE
Q13555	CAMK2G	Calcium/calmodulin-dependent protein kinase type II subunit gamma	0.98166	0.76508	0.62513	0.98125	TRUE	TRUE	FALSE	TRUE	-0.301633	0.954735	0.451584	0.00519528	0.993822	0.990673	-0.285037	0.998931	0.613399	0.306828	0.991251	0.492817	0.0165953	1	0.976449	-0.290233	0.921792	0.627569	FALSE	FALSE	FALSE	FALSE	FALSE	FALSE
Q8NCB2	CAMKV	CaM kinase-like vesicle-associated protein	0.91903	0.30649	0.68551	0	TRUE	FALSE	FALSE	FALSE	NA	NA	NA	NA	NA	NA	NA	NA	NA	NA	NA	NA	NA	NA	NA	NA	NA	NA	NA	NA	NA	NA	NA	NA
Q86VP6	CAND1	Cullin-associated NEDD8-dissociated protein 1	0.92969	0.83079	0.77988	0.68551	TRUE	TRUE	TRUE	FALSE	0.023599	0.974463	0.947563	-0.171825	0.992506	0.669213	0.0669503	0.999075	0.895056	-0.195424	0.99255	0.627293	0.0433513	1	0.931923	0.238776	0.924567	0.658177	FALSE	FALSE	FALSE	FALSE	FALSE	FALSE
P27824	CANX	Calnexin	0.9732	0.87441	0.92762	0.68551	TRUE	TRUE	TRUE	FALSE	-0.388557	0.954519	0.448751	-0.792484	0.986653	0.174742	-1.04133	0.998336	0.159423	-0.403927	0.991106	0.480752	-0.652773	1	0.36976	-0.248846	0.931374	0.744753	FALSE	FALSE	FALSE	FALSE	FALSE	FALSE
Q01518	CAP1	Adenylyl cyclase-associated protein 1	0.84847	0.81609	0.39118	0.99318	TRUE	TRUE	FALSE	TRUE	0.440123	0.958476	0.506133	0.404591	0.992022	0.583851	1.00316	0.998621	0.288594	-0.0355313	0.994456	0.961471	0.563033	1	0.547105	0.598564	0.913179	0.546191	FALSE	FALSE	FALSE	FALSE	FALSE	FALSE
P40123	CAP2	Adenylyl cyclase-associated protein 2	0.98095	0.7294	0.68551	0	TRUE	FALSE	FALSE	FALSE	1.11136	0.910221	0.180585	3.09156	0.916867	0.00273679	4.21691	0.992023	0.00149315	1.98019	0.952902	0.0394449	3.10555	1	0.0130586	1.12535	0.881885	0.359539	FALSE	FALSE	FALSE	FALSE	FALSE	FALSE
P40121	CAPG	Macrophage-capping protein	0.93741	0.85987	0.8334	0.68551	TRUE	TRUE	TRUE	FALSE	0.194175	0.968174	0.716362	0.46821	0.990923	0.436359	-0.283793	0.998986	0.707338	0.274035	0.992702	0.646869	-0.477968	1	0.528675	-0.752004	0.88035	0.35319	FALSE	FALSE	FALSE	FALSE	FALSE	FALSE
P07384	CAPN1	Calpain-1 catalytic subunit	0.70589	0.74919	0.54296	0.98835	FALSE	FALSE	FALSE	TRUE	0.0722898	0.972842	0.877185	0.808728	0.985106	0.134074	-0.48587	0.998823	0.465876	0.736438	0.982445	0.170235	-0.55816	1	0.403311	-1.2946	0.67513	0.0775184	FALSE	FALSE	FALSE	FALSE	FALSE	FALSE
P17655	CAPN2	Calpain-2 catalytic subunit	0.96186	0.67152	0.68551	0	TRUE	FALSE	FALSE	FALSE	0.34015	0.963848	0.607096	2.26925	0.941907	0.00583667	3.02641	0.994471	0.00401411	1.9291	0.911289	0.0160561	2.68626	1	0.00903947	0.757156	0.899329	0.447422	FALSE	FALSE	FALSE	FALSE	FALSE	FALSE
P04632	CAPNS1	Calpain small subunit 1	0.9112	0.8206	0	0	TRUE	TRUE	FALSE	FALSE	1.64418	0.870984	0.110347	4.43939	0.841615	0.000733437	4.43939	0.994837	0.00486807	2.79521	0.923854	0.0199049	2.79521	1	0.0586208	0	0.945566	1	FALSE	FALSE	FALSE	FALSE	FALSE	FALSE
Q96L46	CAPNS2	Calpain small subunit 2	0.8796	0.45346	0.68551	0	TRUE	FALSE	FALSE	FALSE	NA	NA	NA	NA	NA	NA	NA	NA	NA	NA	NA	NA	NA	NA	NA	NA	NA	NA	NA	NA	NA	NA	NA	NA
Q13938	CAPS	Calcyphosin	0.86097	0.5659	0.68551	0	TRUE	FALSE	FALSE	FALSE	NA	NA	NA	NA	NA	NA	NA	NA	NA	NA	NA	NA	NA	NA	NA	NA	NA	NA	NA	NA	NA	NA	NA	NA
P52907	CAPZA1	F-actin-capping protein subunit alpha-1	0.91443	0.76421	0.96659	0.99156	TRUE	TRUE	TRUE	TRUE	-0.341164	0.942672	0.329779	-0.454125	0.98847	0.248502	-0.0136218	0.999109	0.977753	-0.112961	0.99352	0.770158	0.327542	1	0.505179	0.440503	0.89069	0.399921	FALSE	FALSE	FALSE	FALSE	FALSE	FALSE
P47755	CAPZA2	F-actin-capping protein subunit alpha-2	0.9854	0.71647	0.8381	0.94632	TRUE	FALSE	TRUE	TRUE	0.491386	0.931548	0.260105	0.125691	0.993088	0.793274	-0.57365	0.998705	0.349869	-0.365695	0.990697	0.449021	-1.06504	1	0.0915553	-0.699341	0.860221	0.284461	FALSE	FALSE	FALSE	FALSE	FALSE	FALSE
P47756	CAPZB	F-actin-capping protein subunit beta	0.97146	0.68888	0.95399	0.68551	TRUE	FALSE	TRUE	FALSE	0.205584	0.968897	0.737904	0.203974	0.992971	0.766422	0.01998	0.99911	0.981624	-0.0016102	0.994604	0.998127	-0.185604	1	0.830685	-0.183994	0.937586	0.841589	FALSE	FALSE	FALSE	FALSE	FALSE	FALSE
P57730	CARD18	Caspase recruitment domain-containing protein 18	0.80274	0.17936	0.68551	0.68551	TRUE	FALSE	FALSE	FALSE	1.44705	0.284413	0.00374426	1.03358	0.977085	0.0477232	0.40985	0.998862	0.514009	-0.413478	0.990072	0.406704	-1.0372	1	0.109192	-0.623725	0.880079	0.35209	FALSE	FALSE	FALSE	FALSE	FALSE	FALSE
A5YM72	CARNS1	Carnosine synthase 1	0.85718	0.91975	0.83977	0	TRUE	TRUE	TRUE	FALSE	NA	NA	NA	NA	NA	NA	NA	NA	NA	NA	NA	NA	NA	NA	NA	NA	NA	NA	NA	NA	NA	NA	NA	NA
P49589	CARS1	Cysteine--tRNA ligase, cytoplasmic	0.91918	0.68551	0	0	TRUE	FALSE	FALSE	FALSE	NA	NA	NA	NA	NA	NA	NA	NA	NA	NA	NA	NA	NA	NA	NA	NA	NA	NA	NA	NA	NA	NA	NA	NA
Q8WXD9	CASKIN1	Caskin-1	0.86687	0.7881	0	0	TRUE	TRUE	FALSE	FALSE	NA	NA	NA	NA	NA	NA	NA	NA	NA	NA	NA	NA	NA	NA	NA	NA	NA	NA	NA	NA	NA	NA	NA	NA
P04040	CAT	Catalase	0.60653	0.67738	0.58755	0.98167	FALSE	FALSE	FALSE	TRUE	-0.454296	0.93595	0.284336	-0.522081	0.988891	0.27155	-2.12143	0.992633	0.00183943	-0.0677841	0.994117	0.884572	-1.66714	1	0.0102809	-1.59935	0.44282	0.0184263	FALSE	FALSE	FALSE	FALSE	FALSE	FALSE
P16152	CBR1	Carbonyl reductase [NADPH] 1	0.90977	0.87225	0.93307	0.92393	TRUE	TRUE	TRUE	TRUE	-1.14892	0.413379	0.00820211	-0.900361	0.977901	0.0520004	-0.57627	0.998648	0.306478	0.24856	0.992083	0.572938	0.572652	1	0.309437	0.324092	0.917397	0.583694	FALSE	FALSE	FALSE	FALSE	FALSE	FALSE
O75828	CBR3	Carbonyl reductase [NADPH] 3	0.96988	0.84393	0.95862	0.68551	TRUE	TRUE	TRUE	FALSE	-1.08487	0.699063	0.0326634	0.0331951	0.993686	0.950224	-0.145884	0.999046	0.828398	1.11807	0.958236	0.0469277	0.93899	1	0.173867	-0.179079	0.935194	0.801965	FALSE	FALSE	FALSE	FALSE	FALSE	FALSE
P78371	CCT2	T-complex protein 1 subunit beta	0.94745	0.88997	0.96853	0.99241	TRUE	TRUE	TRUE	TRUE	0.0516328	0.97323	0.893222	-0.104015	0.993153	0.808996	0.521481	0.998698	0.343754	-0.155648	0.9932	0.717843	0.469848	1	0.392532	0.625496	0.86075	0.285976	FALSE	FALSE	FALSE	FALSE	FALSE	FALSE
P49368	CCT3	T-complex protein 1 subunit gamma	0.97177	0.78035	0.96887	0.9234	TRUE	TRUE	TRUE	TRUE	-0.46546	0.925594	0.232553	-0.712262	0.983714	0.108047	-0.660472	0.99852	0.231049	-0.246801	0.992012	0.565268	-0.195012	1	0.718675	0.0517895	0.942215	0.928009	FALSE	FALSE	FALSE	FALSE	FALSE	FALSE
P50991	CCT4	T-complex protein 1 subunit delta	0.9821	0.64202	0.68551	0	TRUE	FALSE	FALSE	FALSE	0.325947	0.965301	0.640445	2.77328	0.902252	0.00195803	3.78804	0.990771	0.00102688	2.44734	0.798414	0.00503105	3.4621	1	0.00217587	1.01476	0.87626	0.337145	FALSE	FALSE	FALSE	FALSE	FALSE	FALSE
P48643	CCT5	T-complex protein 1 subunit epsilon	0.92423	0.80449	0.94724	0.68551	TRUE	TRUE	TRUE	FALSE	-0.0778446	0.972542	0.86508	-0.783833	0.985278	0.137897	0.540214	0.99877	0.408746	-0.705988	0.983013	0.178975	0.618058	1	0.345993	1.32405	0.655796	0.066262	FALSE	FALSE	FALSE	FALSE	FALSE	FALSE
P40227	CCT6A	T-complex protein 1 subunit zeta	0.93697	0.77626	0.79528	0.9312	TRUE	TRUE	TRUE	TRUE	0.0280133	0.974397	0.944517	-0.428349	0.989986	0.347195	1.25934	0.997386	0.0376032	-0.456363	0.988322	0.317373	1.23132	1	0.0415542	1.68769	0.34367	0.010937	FALSE	FALSE	FALSE	FALSE	FALSE	FALSE
Q99832	CCT7	T-complex protein 1 subunit eta	0.86254	0.84767	0.87134	0.94058	TRUE	TRUE	TRUE	TRUE	0.085211	0.972424	0.860393	0.113034	0.993258	0.834734	0.494585	0.99883	0.473424	0.0278233	0.994446	0.959019	0.409374	1	0.552011	0.381551	0.919177	0.600824	FALSE	FALSE	FALSE	FALSE	FALSE	FALSE
P50990	CCT8	T-complex protein 1 subunit theta	0.9748	0.78561	0.98655	0.96874	TRUE	TRUE	TRUE	TRUE	-0.219827	0.963176	0.59265	-0.787882	0.983022	0.0977349	-0.246203	0.998966	0.671327	-0.568055	0.98534	0.224068	-0.026376	1	0.963651	0.541679	0.887119	0.382682	FALSE	FALSE	FALSE	FALSE	FALSE	FALSE
Q6YHK3	CD109	CD109 antigen	0.80268	0.87368	0	0	TRUE	TRUE	FALSE	FALSE	NA	NA	NA	NA	NA	NA	NA	NA	NA	NA	NA	NA	NA	NA	NA	NA	NA	NA	NA	NA	NA	NA	NA	NA
Q86VB7	CD163	Scavenger receptor cysteine-rich type 1 protein M130	0.79073	0.87125	0.68551	0.68551	TRUE	TRUE	FALSE	FALSE	0.121748	0.970379	0.785582	-0.804993	0.984391	0.119715	-2.75883	0.985082	0.000321407	-0.926741	0.970026	0.0762747	-2.88057	1	0.000208598	-1.95383	0.293167	0.00843575	FALSE	FALSE	FALSE	FALSE	FALSE	FALSE
P41217	CD200	OX-2 membrane glycoprotein	0.93396	0.86391	0	0	TRUE	TRUE	FALSE	FALSE	1.06884	0.905	0.167309	2.68676	0.934817	0.00456342	2.68676	0.996785	0.0197245	1.61792	0.967304	0.0670967	1.61792	1	0.140878	0	0.945566	1	FALSE	FALSE	FALSE	FALSE	FALSE	FALSE
P16070	CD44	CD44 antigen	0.85869	0.85233	0.927	0.99011	TRUE	TRUE	TRUE	TRUE	-1.34647	0.843139	0.084281	-0.657846	0.990912	0.435117	0.235474	0.999044	0.823838	0.688623	0.990192	0.41432	1.58194	1	0.146408	0.893321	0.896283	0.429652	FALSE	FALSE	FALSE	FALSE	FALSE	FALSE
Q08722	CD47	Leukocyte surface antigen CD47	0.89919	0.64658	0.92516	0.99266	TRUE	FALSE	TRUE	TRUE	0.330784	0.958729	0.510226	-0.653591	0.988509	0.250487	0.817909	0.998566	0.255397	-0.984375	0.973288	0.0904951	0.487125	1	0.493129	1.4715	0.646215	0.0616197	FALSE	FALSE	FALSE	FALSE	FALSE	FALSE
P13987	CD59	CD59 glycoprotein	0.86099	0.462	0.68551	0	TRUE	FALSE	FALSE	FALSE	-0.375456	0.96775	0.704233	1.00554	0.990228	0.367696	2.03365	0.998328	0.156792	1.381	0.985188	0.220552	2.40911	1	0.0970397	1.02811	0.905919	0.49035	FALSE	FALSE	FALSE	FALSE	FALSE	FALSE
P60033	CD81	CD81 antigen	0.83807	0.8531	0.91049	0.99366	TRUE	TRUE	TRUE	TRUE	0.570259	0.91503	0.194504	0.83248	0.982853	0.0954201	1.18214	0.997786	0.0637116	0.262221	0.992204	0.586297	0.611877	1	0.320158	0.349656	0.917912	0.588568	FALSE	FALSE	FALSE	FALSE	FALSE	FALSE
P32320	CDA	Cytidine deaminase	0.62825	0.28991	0.06065	0.9308	FALSE	FALSE	FALSE	TRUE	0.19824	0.968349	0.721496	-0.241889	0.992649	0.697353	-0.869707	0.998601	0.276013	-0.44013	0.991113	0.481323	-1.06795	1	0.184605	-0.627817	0.900479	0.454455	FALSE	FALSE	FALSE	FALSE	FALSE	FALSE
Q16543	CDC37	Hsp90 co-chaperone Cdc37	0.8266	0.52506	0.68551	0	TRUE	FALSE	FALSE	FALSE	NA	NA	NA	NA	NA	NA	NA	NA	NA	NA	NA	NA	NA	NA	NA	NA	NA	NA	NA	NA	NA	NA	NA	NA
P55290	CDH13	Cadherin-13	0.91629	0.68379	0.68551	0	TRUE	FALSE	FALSE	FALSE	NA	NA	NA	NA	NA	NA	NA	NA	NA	NA	NA	NA	NA	NA	NA	NA	NA	NA	NA	NA	NA	NA	NA	NA
P19022	CDH2	Cadherin-2	0.9716	0.6497	0.83887	0	TRUE	FALSE	TRUE	FALSE	-0.0763045	0.973579	0.908041	1.68257	0.97313	0.0328321	3.52449	0.991381	0.00122214	1.75887	0.937793	0.0264968	3.6008	1	0.00101542	1.84193	0.672071	0.0755401	FALSE	FALSE	FALSE	FALSE	FALSE	FALSE
O95674	CDS2	Phosphatidate cytidylyltransferase 2	0.9128	0.76352	0	0	TRUE	TRUE	FALSE	FALSE	1.49475	0.441921	0.0100046	2.15153	0.892537	0.00161232	2.15153	0.99582	0.00895467	0.656779	0.987121	0.273176	0.656779	1	0.383353	0	0.945566	1	FALSE	FALSE	FALSE	FALSE	FALSE	FALSE
Q15517	CDSN	Corneodesmosin	0.44494	0.44768	0.68383	0.99361	FALSE	FALSE	FALSE	TRUE	0.056486	0.97399	0.926094	-0.590175	0.990481	0.390903	-1.99798	0.997195	0.0301218	-0.646661	0.989008	0.348153	-2.05447	1	0.0262775	-1.40781	0.766847	0.135365	FALSE	FALSE	FALSE	FALSE	FALSE	FALSE
Q8N111	CEND1	Cell cycle exit and neuronal differentiation protein 1	0.86834	0.37789	0.68551	0	TRUE	FALSE	FALSE	FALSE	NA	NA	NA	NA	NA	NA	NA	NA	NA	NA	NA	NA	NA	NA	NA	NA	NA	NA	NA	NA	NA	NA	NA	NA
Q6ZTR5	CFAP47	Cilia- and flagella-associated protein 47	0.49475	0.89747	0.82547	0.98886	FALSE	TRUE	TRUE	TRUE	-1.66241	0.612325	0.021622	-1.04457	0.986653	0.174768	-0.220181	0.99904	0.816571	0.617843	0.990193	0.414374	1.44223	1	0.140422	0.824388	0.893963	0.416885	FALSE	FALSE	FALSE	FALSE	FALSE	FALSE
P08603	CFH	Complement factor H	0.93285	0.64533	0.79234	0	TRUE	FALSE	TRUE	FALSE	0.637268	0.961357	0.55636	0.663458	0.99202	0.583603	2.85829	0.997881	0.0733258	0.0261899	0.994543	0.982664	2.22102	1	0.156812	2.19483	0.811472	0.185527	FALSE	FALSE	FALSE	FALSE	FALSE	FALSE
P23528	CFL1	Cofilin-1	0.7204	0.86887	0.844	0.99332	FALSE	TRUE	TRUE	TRUE	-0.325669	0.956674	0.47852	-0.0299868	0.993696	0.953129	-0.796096	0.998511	0.226891	0.295683	0.992	0.564018	-0.470426	1	0.469288	-0.766109	0.855395	0.271205	FALSE	FALSE	FALSE	FALSE	FALSE	FALSE
Q9Y281	CFL2	Cofilin-2	0.98446	0.72956	0.9148	0.94939	TRUE	FALSE	TRUE	TRUE	-0.0135119	0.975005	0.973173	0.174558	0.992653	0.698193	0.328234	0.9989	0.565315	0.18807	0.992918	0.676215	0.341746	1	0.549572	0.153676	0.935002	0.798916	FALSE	FALSE	FALSE	FALSE	FALSE	FALSE
P36222	CHI3L1	Chitinase-3-like protein 1	0.79873	0.44899	0	0	TRUE	FALSE	FALSE	FALSE	NA	NA	NA	NA	NA	NA	NA	NA	NA	NA	NA	NA	NA	NA	NA	NA	NA	NA	NA	NA	NA	NA	NA	NA
O00533	CHL1	Neural cell adhesion molecule L1-like protein	0.97358	0.79784	0.92213	0.68551	TRUE	TRUE	TRUE	FALSE	-0.117033	0.970185	0.779035	-1.19436	0.965142	0.018036	-1.01698	0.998058	0.097028	-1.07733	0.943778	0.0306016	-0.899949	1	0.138764	0.177381	0.933571	0.776797	FALSE	FALSE	FALSE	FALSE	FALSE	FALSE
Q9H444	CHMP4B	Charged multivesicular body protein 4b	0.86614	0.27723	0.68551	0.68552	TRUE	FALSE	FALSE	FALSE	0.288921	0.958415	0.505158	-1.31405	0.959218	0.0126671	-0.40611	0.998858	0.507721	-1.60297	0.734675	0.0033498	-0.69503	1	0.262472	0.907936	0.800916	0.171307	FALSE	FALSE	FALSE	FALSE	FALSE	FALSE
P12277	CKB	Creatine kinase B-type	0.83406	0.86009	0.87463	0.98028	TRUE	TRUE	TRUE	TRUE	0.463089	0.911449	0.183975	0.762148	0.978725	0.0569149	0.62309	0.998463	0.205167	0.299059	0.990505	0.43529	0.160001	1	0.739649	-0.139058	0.934127	0.785283	FALSE	FALSE	FALSE	FALSE	FALSE	FALSE
P06732	CKM	Creatine kinase M-type	0.77735	0.79987	0	0	TRUE	TRUE	FALSE	FALSE	NA	NA	NA	NA	NA	NA	NA	NA	NA	NA	NA	NA	NA	NA	NA	NA	NA	NA	NA	NA	NA	NA	NA	NA
P12532	CKMT1B	Creatine kinase U-type, mitochondrial	0.81862	0.70627	0.90184	0.96094	TRUE	FALSE	TRUE	TRUE	-0.311914	0.957865	0.496471	-0.769605	0.985492	0.142871	-0.268736	0.99897	0.677409	-0.457691	0.989517	0.37432	0.0431778	1	0.946583	0.500869	0.902463	0.467024	FALSE	FALSE	FALSE	FALSE	FALSE	FALSE
O75122	CLASP2	CLIP-associating protein 2	0.87191	0.65593	0.68551	0	TRUE	FALSE	FALSE	FALSE	NA	NA	NA	NA	NA	NA	NA	NA	NA	NA	NA	NA	NA	NA	NA	NA	NA	NA	NA	NA	NA	NA	NA	NA
P05452	CLEC3B	Tetranectin	0.79145	0	0	0	TRUE	FALSE	FALSE	FALSE	NA	NA	NA	NA	NA	NA	NA	NA	NA	NA	NA	NA	NA	NA	NA	NA	NA	NA	NA	NA	NA	NA	NA	NA
O00299	CLIC1	Chloride intracellular channel protein 1	0.91857	0.77961	0.68551	0	TRUE	TRUE	FALSE	FALSE	-0.570862	0.964981	0.63285	2.31635	0.982795	0.0946449	3.55934	0.997547	0.0459735	2.88721	0.954263	0.0411486	4.1302	1	0.0228799	1.24299	0.905806	0.489557	FALSE	FALSE	FALSE	FALSE	FALSE	FALSE
Q9Y696	CLIC4	Chloride intracellular channel protein 4	0.85886	0.82051	0.83582	0	TRUE	TRUE	TRUE	FALSE	NA	NA	NA	NA	NA	NA	NA	NA	NA	NA	NA	NA	NA	NA	NA	NA	NA	NA	NA	NA	NA	NA	NA	NA
Q9UDT6	CLIP2	CAP-Gly domain-containing linker protein 2	0.79412	0.22819	0	0	TRUE	FALSE	FALSE	FALSE	NA	NA	NA	NA	NA	NA	NA	NA	NA	NA	NA	NA	NA	NA	NA	NA	NA	NA	NA	NA	NA	NA	NA	NA
O94985	CLSTN1	Calsyntenin-1	0.97231	0.7158	0.68551	0.68551	TRUE	FALSE	FALSE	FALSE	0.926863	0.769948	0.0489243	0.16122	0.992882	0.746382	0.287948	0.998953	0.648393	-0.765643	0.979655	0.136141	-0.638914	1	0.317077	0.126729	0.938046	0.849568	FALSE	FALSE	FALSE	FALSE	FALSE	FALSE
P09496	CLTA	Clathrin light chain A	0.92478	0.31683	0.68551	0	TRUE	FALSE	FALSE	FALSE	1.46103	0.750335	0.0433729	1.7949	0.971274	0.0281097	2.61802	0.996317	0.013056	0.33387	0.992818	0.662387	1.15699	1	0.239552	0.823121	0.895501	0.425279	FALSE	FALSE	FALSE	FALSE	FALSE	FALSE
P09497	CLTB	Clathrin light chain B	0.91729	0.30839	0.68551	0	TRUE	FALSE	FALSE	FALSE	NA	NA	NA	NA	NA	NA	NA	NA	NA	NA	NA	NA	NA	NA	NA	NA	NA	NA	NA	NA	NA	NA	NA	NA
Q00610	CLTC	Clathrin heavy chain 1	0.94535	0.86158	0.812	0.9615	TRUE	TRUE	TRUE	TRUE	0.301484	0.941969	0.324458	0.586311	0.982817	0.094946	0.866197	0.997672	0.0542793	0.284827	0.990016	0.403243	0.564713	1	0.196312	0.279886	0.912263	0.53857	FALSE	FALSE	FALSE	FALSE	FALSE	FALSE
P10909	CLU	Clusterin	0.84769	0.80996	0.79438	0.83122	TRUE	TRUE	TRUE	TRUE	-0.242995	0.96553	0.646006	0.592209	0.98966	0.321989	-0.858842	0.998571	0.25819	0.835204	0.982294	0.168038	-0.615847	1	0.413455	-1.45105	0.677708	0.0792513	FALSE	FALSE	FALSE	FALSE	FALSE	FALSE
Q8NFW8	CMAS	N-acylneuraminate cytidylyltransferase	0.97398	0.57822	0.78565	0	TRUE	FALSE	TRUE	FALSE	0.286377	0.9653	0.640418	0.91303	0.987168	0.192146	2.02175	0.99716	0.0289754	0.626653	0.989337	0.364694	1.73537	1	0.0566607	1.10872	0.840394	0.235823	FALSE	FALSE	FALSE	FALSE	FALSE	FALSE
P30085	CMPK1	UMP-CMP kinase	0.85877	0.86788	0.60847	0.68551	TRUE	TRUE	FALSE	FALSE	-0.141601	0.97204	0.845483	1.09872	0.987016	0.186779	0.49767	0.998941	0.6291	1.24032	0.979902	0.13868	0.639271	1	0.535847	-0.601053	0.917292	0.582707	FALSE	FALSE	FALSE	FALSE	FALSE	FALSE
Q96KN2	CNDP1	Beta-Ala-His dipeptidase	0.84631	0.7433	0.68551	0	TRUE	FALSE	FALSE	FALSE	NA	NA	NA	NA	NA	NA	NA	NA	NA	NA	NA	NA	NA	NA	NA	NA	NA	NA	NA	NA	NA	NA	NA	NA
Q96KP4	CNDP2	Cytosolic non-specific dipeptidase	0.88287	0.85348	0.921	0.90672	TRUE	TRUE	TRUE	TRUE	-0.0666921	0.97308	0.886941	0.697739	0.987215	0.193846	0.468215	0.998838	0.483229	0.764431	0.981444	0.156491	0.534907	1	0.424108	-0.229524	0.931361	0.744569	FALSE	FALSE	FALSE	FALSE	FALSE	FALSE
P09543	CNP	2',3'-cyclic-nucleotide 3'-phosphodiesterase	0.78363	0.85436	0.58591	0.54467	TRUE	TRUE	FALSE	FALSE	0.267771	0.961985	0.568452	0.319572	0.991756	0.542909	0.0878755	0.999075	0.894254	0.0518012	0.994283	0.921039	-0.179896	1	0.785698	-0.231697	0.931134	0.741396	FALSE	FALSE	FALSE	FALSE	FALSE	FALSE
Q9Y2B0	CNPY2	Protein canopy homolog 2	0.93275	0.59471	0.68551	0	TRUE	FALSE	FALSE	FALSE	1.23307	0.903008	0.16268	1.92473	0.978752	0.0570847	2.73702	0.997317	0.034619	0.691656	0.991031	0.474651	1.50395	1	0.225379	0.812289	0.911299	0.530747	FALSE	FALSE	FALSE	FALSE	FALSE	FALSE
Q96F85	CNRIP1	CB1 cannabinoid receptor-interacting protein 1	0.87915	0.90099	0.66791	0.68551	TRUE	TRUE	FALSE	FALSE	0.154205	0.971573	0.827892	0.527662	0.99151	0.508146	0.962112	0.998697	0.343299	0.373457	0.992638	0.638511	0.807907	1	0.424453	0.43445	0.926708	0.683527	FALSE	FALSE	FALSE	FALSE	FALSE	FALSE
Q12860	CNTN1	Contactin-1	0.74433	0.91606	0.87846	0.9818	FALSE	TRUE	TRUE	TRUE	-0.0634092	0.972603	0.867527	0.231073	0.992047	0.588065	1.12742	0.99757	0.0473804	0.294482	0.991231	0.491128	1.19083	1	0.037334	0.896347	0.758252	0.128121	FALSE	FALSE	FALSE	FALSE	FALSE	FALSE
Q02246	CNTN2	Contactin-2	0.98829	0.70997	0.98462	0.97981	TRUE	FALSE	TRUE	TRUE	-0.381924	0.939063	0.303941	-0.719971	0.982525	0.0911715	0.0409491	0.999093	0.936948	-0.338047	0.990174	0.413163	0.422873	1	0.41825	0.76092	0.805178	0.176834	FALSE	FALSE	FALSE	FALSE	FALSE	FALSE
Q8IWV2	CNTN4	Contactin-4	0.80591	0.85339	0.68551	0	TRUE	TRUE	FALSE	FALSE	NA	NA	NA	NA	NA	NA	NA	NA	NA	NA	NA	NA	NA	NA	NA	NA	NA	NA	NA	NA	NA	NA	NA	NA
O94779	CNTN5	Contactin-5	0.6043	0.19326	0.78983	0.68551	FALSE	FALSE	TRUE	FALSE	0.231432	0.970423	0.787086	0.204792	0.993242	0.83066	-1.72465	0.998356	0.165647	-0.0266397	0.994523	0.977793	-1.95608	1	0.118574	-1.92944	0.777093	0.144847	FALSE	FALSE	FALSE	FALSE	FALSE	FALSE
P78357	CNTNAP1	Contactin-associated protein 1	0.92771	0.90005	0.72428	0.9867	TRUE	TRUE	FALSE	TRUE	-0.60473	0.669037	0.0281042	-0.0010475	0.993843	0.99709	0.0767402	0.999048	0.832833	0.603682	0.958301	0.0470352	0.68147	1	0.0732255	0.0777877	0.937501	0.840131	FALSE	FALSE	FALSE	FALSE	FALSE	FALSE
P02452	COL1A1	Collagen alpha-1(I) chain	0.86856	0.13418	0.68551	0	TRUE	FALSE	FALSE	FALSE	NA	NA	NA	NA	NA	NA	NA	NA	NA	NA	NA	NA	NA	NA	NA	NA	NA	NA	NA	NA	NA	NA	NA	NA
P08123	COL1A2	Collagen alpha-2(I) chain	0.79954	0.15523	0	0	TRUE	FALSE	FALSE	FALSE	NA	NA	NA	NA	NA	NA	NA	NA	NA	NA	NA	NA	NA	NA	NA	NA	NA	NA	NA	NA	NA	NA	NA	NA
Q9BXS0	COL25A1	Collagen alpha-1(XXV) chain	0.86914	0	0	0	TRUE	FALSE	FALSE	FALSE	NA	NA	NA	NA	NA	NA	NA	NA	NA	NA	NA	NA	NA	NA	NA	NA	NA	NA	NA	NA	NA	NA	NA	NA
P08572	COL4A2	Collagen alpha-2(IV) chain	0.88049	0.89857	0	0	TRUE	TRUE	FALSE	FALSE	-0.0412522	0.97436	0.942792	1.56307	0.969153	0.0238481	1.56307	0.997819	0.0668604	1.60432	0.926255	0.0208249	1.60432	1	0.0605827	0	0.945566	1	FALSE	FALSE	FALSE	FALSE	FALSE	FALSE
P12109	COL6A1	Collagen alpha-1(VI) chain	0.94775	0.58071	0.68551	0	TRUE	FALSE	FALSE	FALSE	1.17156	0.901249	0.158769	2.01079	0.974358	0.0366245	2.88037	0.996789	0.0198031	0.839235	0.989221	0.35874	1.70882	1	0.146793	0.869582	0.90388	0.476356	FALSE	FALSE	FALSE	FALSE	FALSE	FALSE
P21964	COMT	Catechol O-methyltransferase	0.96693	0.56466	0.68551	0	TRUE	FALSE	FALSE	FALSE	0.443534	0.959446	0.522146	1.5717	0.9781	0.053127	2.33498	0.997049	0.0257072	1.12816	0.981306	0.154736	1.89144	1	0.06452	0.763283	0.901927	0.463571	FALSE	FALSE	FALSE	FALSE	FALSE	FALSE
P35606	COPB2	Coatomer subunit beta'	0.86031	0.3622	0.68551	0.68551	TRUE	FALSE	FALSE	FALSE	1.05511	0.470097	0.0119792	0.942073	0.974937	0.0386386	0.859789	0.998205	0.124946	-0.113034	0.993645	0.792095	-0.195318	1	0.719011	-0.0822839	0.940067	0.886195	FALSE	FALSE	FALSE	FALSE	FALSE	FALSE
Q9UNS2	COPS3	COP9 signalosome complex subunit 3	0.97964	0.87019	0.68551	0	TRUE	TRUE	FALSE	FALSE	-0.137636	0.971343	0.819431	2.69294	0.841751	0.000734718	3.61572	0.986714	0.000421359	2.83058	0.370183	0.000462683	3.75336	1	0.000292804	0.922783	0.869806	0.314157	FALSE	FALSE	FALSE	FALSE	FALSE	FALSE
Q9BT78	COPS4	COP9 signalosome complex subunit 4	0.9059	0.38898	0.77669	0	TRUE	FALSE	TRUE	FALSE	NA	NA	NA	NA	NA	NA	NA	NA	NA	NA	NA	NA	NA	NA	NA	NA	NA	NA	NA	NA	NA	NA	NA	NA
Q9UBW8	COPS7A	COP9 signalosome complex subunit 7a	0.92573	0.91622	0.83902	0	TRUE	TRUE	TRUE	FALSE	1.04606	0.922177	0.218931	0.920877	0.989757	0.329193	2.44392	0.997605	0.0496002	-0.125186	0.994156	0.893079	1.39786	1	0.244327	1.52305	0.838648	0.232193	FALSE	FALSE	FALSE	FALSE	FALSE	FALSE
P31146	CORO1A	Coronin-1A	0.9308	0.75388	0.95786	0.68551	TRUE	TRUE	TRUE	FALSE	0.930012	0.902294	0.161072	0.343215	0.992324	0.635362	-0.0247465	0.999109	0.978368	-0.586797	0.990284	0.420313	-0.954758	1	0.30275	-0.367961	0.928376	0.704421	FALSE	FALSE	FALSE	FALSE	FALSE	FALSE
Q9BR76	CORO1B	Coronin-1B	0.96535	0.7829	0.68551	0	TRUE	TRUE	FALSE	FALSE	0.29572	0.963596	0.601603	2.2612	0.900183	0.00187554	3.26339	0.988511	0.000596595	1.96548	0.807754	0.00538824	2.96767	1	0.00138223	1.00219	0.844782	0.245361	FALSE	FALSE	FALSE	FALSE	FALSE	FALSE
Q9ULV4	CORO1C	Coronin-1C	0.96637	0.77567	0.92557	0.68551	TRUE	TRUE	TRUE	FALSE	0.332968	0.96213	0.571305	1.09407	0.983664	0.107251	4.04249	0.974793	0.000101017	0.761102	0.986483	0.253693	3.70952	1	0.000247437	2.94842	0.156723	0.00313455	FALSE	FALSE	FALSE	FALSE	FALSE	FALSE
Q14019	COTL1	Coactosin-like protein	0.87326	0.85143	0.92059	0	TRUE	TRUE	TRUE	FALSE	0.649623	0.951809	0.415584	1.29637	0.985942	0.154152	4.42336	0.989838	0.000806594	0.646743	0.990942	0.467642	3.77374	1	0.00300755	3.12699	0.409889	0.0154167	FALSE	FALSE	FALSE	FALSE	FALSE	FALSE
P13073	COX4I1	Cytochrome c oxidase subunit 4 isoform 1, mitochondrial	0.85882	0.27659	0	0	TRUE	FALSE	FALSE	FALSE	NA	NA	NA	NA	NA	NA	NA	NA	NA	NA	NA	NA	NA	NA	NA	NA	NA	NA	NA	NA	NA	NA	NA	NA
P20674	COX5A	Cytochrome c oxidase subunit 5A, mitochondrial	0.71389	0.66016	0.83959	0.98828	FALSE	FALSE	TRUE	TRUE	0.393765	0.943927	0.339675	0.764611	0.983559	0.105605	-0.0357661	0.999098	0.950469	0.370846	0.990272	0.419511	-0.429531	1	0.459128	-0.800377	0.821209	0.200373	FALSE	FALSE	FALSE	FALSE	FALSE	FALSE
P10606	COX5B	Cytochrome c oxidase subunit 5B, mitochondrial	0.8903	0.47483	0.68551	0	TRUE	FALSE	FALSE	FALSE	NA	NA	NA	NA	NA	NA	NA	NA	NA	NA	NA	NA	NA	NA	NA	NA	NA	NA	NA	NA	NA	NA	NA	NA
P14854	COX6B1	Cytochrome c oxidase subunit 6B1	0.84134	0.77597	0.92707	0.68551	TRUE	TRUE	TRUE	FALSE	0.254459	0.957879	0.496691	0.819078	0.979341	0.0610369	-0.413533	0.998796	0.4357	0.564619	0.983401	0.185372	-0.667992	1	0.21407	-1.23261	0.57128	0.0378341	FALSE	FALSE	FALSE	FALSE	FALSE	FALSE
P14406	COX7A2	Cytochrome c oxidase subunit 7A2, mitochondrial	0.87941	0.59407	0.68551	0	TRUE	FALSE	FALSE	FALSE	NA	NA	NA	NA	NA	NA	NA	NA	NA	NA	NA	NA	NA	NA	NA	NA	NA	NA	NA	NA	NA	NA	NA	NA
Q9UI42	CPA4	Carboxypeptidase A4	0.45822	0.69429	0.48963	0.99133	FALSE	FALSE	FALSE	TRUE	-0.264832	0.962337	0.575424	-0.702373	0.987182	0.19267	-2.36294	0.992903	0.0020311	-0.437541	0.990129	0.410286	-2.09811	1	0.0049743	-1.66057	0.518755	0.0282259	FALSE	FALSE	FALSE	FALSE	FALSE	FALSE
P16870	CPE	Carboxypeptidase E	0.94991	0.81566	0.99117	0.96386	TRUE	TRUE	TRUE	TRUE	-0.8768	0.431806	0.00930529	-0.393729	0.988646	0.257791	-0.967531	0.997341	0.0356369	0.483071	0.982342	0.168734	-0.0907313	1	0.833821	-0.573802	0.832679	0.220441	FALSE	FALSE	FALSE	FALSE	FALSE	FALSE
Q6PUV4	CPLX2	Complexin-2	0.89039	0.27572	0.68551	0	TRUE	FALSE	FALSE	FALSE	NA	NA	NA	NA	NA	NA	NA	NA	NA	NA	NA	NA	NA	NA	NA	NA	NA	NA	NA	NA	NA	NA	NA	NA
P14384	CPM	Carboxypeptidase M	0.94486	0.63194	0	0.68551	TRUE	FALSE	FALSE	FALSE	0.791842	0.939828	0.309122	2.26174	0.962652	0.0154301	0.554231	0.99893	0.610801	1.4699	0.974894	0.0992658	-0.237612	1	0.826774	-1.70751	0.781963	0.149716	FALSE	FALSE	FALSE	FALSE	FALSE	FALSE
Q9HCH3	CPNE5	Copine-5	0.9412	0.7651	0.96444	0.68551	TRUE	TRUE	TRUE	FALSE	0.18414	0.963021	0.589404	-0.179575	0.992335	0.637487	-0.866837	0.997968	0.0838919	-0.363716	0.988931	0.344467	-1.05098	1	0.0395887	-0.687261	0.813375	0.188288	FALSE	FALSE	FALSE	FALSE	FALSE	FALSE
O95741	CPNE6	Copine-6	0.98035	0.58468	0.68551	0	TRUE	FALSE	FALSE	FALSE	1.80116	0.391875	0.00713346	2.73215	0.831102	0.000643912	3.41029	0.989403	0.000726985	0.930998	0.982952	0.177996	1.60914	1	0.0714194	0.678141	0.900818	0.456559	FALSE	FALSE	FALSE	FALSE	FALSE	FALSE
Q9BRF8	CPPED1	Serine/threonine-protein phosphatase CPPED1	0.86766	0.53457	0.68551	0	TRUE	FALSE	FALSE	FALSE	NA	NA	NA	NA	NA	NA	NA	NA	NA	NA	NA	NA	NA	NA	NA	NA	NA	NA	NA	NA	NA	NA	NA	NA
Q9Y646	CPQ	Carboxypeptidase Q	0.87029	0.88314	0.96388	0	TRUE	TRUE	TRUE	FALSE	-1.76998	0.845315	0.0859314	-1.52219	0.986794	0.179304	2.12576	0.998268	0.140283	0.24779	0.99381	0.822666	3.89574	1	0.0111234	3.64795	0.477338	0.0224425	FALSE	FALSE	FALSE	FALSE	FALSE	FALSE
P31327	CPS1	Carbamoyl-phosphate synthase [ammonia], mitochondrial	0.31667	0.82693	0.44588	0.88804	FALSE	TRUE	FALSE	TRUE	-1.10444	0.887823	0.133552	-1.02714	0.987576	0.207717	-2.11021	0.997578	0.0478605	0.0772981	0.99429	0.922759	-1.00577	1	0.325149	-1.08306	0.870943	0.318016	FALSE	FALSE	FALSE	FALSE	FALSE	FALSE
P52943	CRIP2	Cysteine-rich protein 2	0.92251	0.81737	0.68551	0	TRUE	TRUE	FALSE	FALSE	NA	NA	NA	NA	NA	NA	NA	NA	NA	NA	NA	NA	NA	NA	NA	NA	NA	NA	NA	NA	NA	NA	NA	NA
P46109	CRKL	Crk-like protein	0.90854	0.62388	0.68551	0	TRUE	FALSE	FALSE	FALSE	NA	NA	NA	NA	NA	NA	NA	NA	NA	NA	NA	NA	NA	NA	NA	NA	NA	NA	NA	NA	NA	NA	NA	NA
Q14194	CRMP1	Dihydropyrimidinase-related protein 1	0.98613	0.84538	0.99158	0.97682	TRUE	TRUE	TRUE	TRUE	-0.256065	0.95123	0.409041	0.0965659	0.993026	0.778823	0.656961	0.998277	0.142471	0.352631	0.988181	0.311557	0.913026	1	0.0470273	0.560395	0.839182	0.233292	FALSE	FALSE	FALSE	FALSE	FALSE	FALSE
P02511	CRYAB	Alpha-crystallin B chain	0.86392	0.90005	0.57758	0.97803	TRUE	TRUE	FALSE	TRUE	-0.859625	0.621762	0.0225504	-0.228492	0.991875	0.560728	-0.195044	0.998979	0.693866	0.631133	0.977736	0.118849	0.664581	1	0.18963	0.0334479	0.943241	0.949149	FALSE	FALSE	FALSE	FALSE	FALSE	FALSE
Q9Y2S2	CRYL1	Lambda-crystallin homolog	0.96557	0.72048	0.92611	0.99227	TRUE	FALSE	TRUE	TRUE	0.0194318	0.974913	0.968759	-0.445786	0.990825	0.42575	-1.14651	0.998157	0.114765	-0.465218	0.990064	0.406227	-1.16594	1	0.109148	-0.700719	0.880133	0.35231	FALSE	FALSE	FALSE	FALSE	FALSE	FALSE
Q14894	CRYM	Ketimine reductase mu-crystallin	0.9726	0.68813	0.96696	0.9523	TRUE	FALSE	TRUE	TRUE	-0.218224	0.962183	0.572359	0.071483	0.993388	0.868082	0.468633	0.998755	0.394001	0.289707	0.991373	0.503388	0.686856	1	0.216765	0.39715	0.906471	0.494254	FALSE	FALSE	FALSE	FALSE	FALSE	FALSE
Q08257	CRYZ	Quinone oxidoreductase	0.83431	0.62867	0.80269	0.97105	TRUE	FALSE	TRUE	TRUE	-0.814055	0.923088	0.222427	-1.28836	0.982464	0.0904067	-0.212408	0.999041	0.818291	-0.474308	0.99154	0.518539	0.601648	1	0.517376	1.07596	0.858683	0.280124	FALSE	FALSE	FALSE	FALSE	FALSE	FALSE
O75390	CS	Citrate synthase, mitochondrial	0.94498	0.85323	0.49611	0.97849	TRUE	TRUE	FALSE	TRUE	0.21063	0.963039	0.589777	-0.269344	0.991722	0.537965	-0.268069	0.99894	0.627261	-0.479974	0.987263	0.277847	-0.478699	1	0.389268	0.0012745	0.945489	0.998258	FALSE	FALSE	FALSE	FALSE	FALSE	FALSE
P68400;Q8NEV1	CSNK2A1	Casein kinase II subunit alpha;Casein kinase II subunit alpha 3	0.90973	0.59181	0.68551	0	TRUE	FALSE	FALSE	FALSE	NA	NA	NA	NA	NA	NA	NA	NA	NA	NA	NA	NA	NA	NA	NA	NA	NA	NA	NA	NA	NA	NA	NA	NA
P21291	CSRP1	Cysteine and glycine-rich protein 1	0.70002	0.89677	0.96949	0.98891	FALSE	TRUE	TRUE	TRUE	-0.745198	0.92984	0.251643	-0.671981	0.990045	0.352103	-1.31148	0.998331	0.157731	0.0732171	0.994271	0.918264	-0.566278	1	0.532549	-0.639495	0.908179	0.506675	FALSE	FALSE	FALSE	FALSE	FALSE	FALSE
P01034	CST3	Cystatin-C	0.7261	0.72867	0.51451	0.95492	FALSE	FALSE	FALSE	TRUE	0.0282633	0.974693	0.958288	0.985209	0.984155	0.115448	-0.102283	0.999075	0.893552	0.956946	0.978532	0.125546	-0.130546	1	0.864414	-1.08749	0.814799	0.190397	FALSE	FALSE	FALSE	FALSE	FALSE	FALSE
P01036	CST4	Cystatin-S	0.87375	0.44597	0.68551	0.99299	TRUE	FALSE	FALSE	TRUE	0.505542	0.902073	0.16058	0.211001	0.992069	0.591622	-0.341902	0.998846	0.493038	-0.294541	0.990786	0.455636	-0.847443	1	0.0998533	-0.552903	0.865464	0.300103	FALSE	FALSE	FALSE	FALSE	FALSE	FALSE
Q15828	CST6	Cystatin-M	0.59251	0.45217	0.21894	0.99206	FALSE	FALSE	FALSE	TRUE	0.468495	0.930424	0.25448	-0.0216993	0.993725	0.96165	-1.33609	0.997157	0.0288776	-0.490195	0.987477	0.285153	-1.80459	1	0.00486543	-1.31439	0.584502	0.0409056	FALSE	FALSE	FALSE	FALSE	FALSE	FALSE
P01040	CSTA	Cystatin-A	0.48297	0.57596	0.53198	0.99222	FALSE	FALSE	FALSE	TRUE	-1.1209	0.767857	0.0482817	-0.89305	0.985724	0.148531	-2.96543	0.990287	0.000902816	0.227853	0.993114	0.704724	-1.84453	1	0.0239503	-2.07238	0.434947	0.0176445	FALSE	FALSE	FALSE	FALSE	FALSE	FALSE
P04080	CSTB	Cystatin-B	0.92903	0.63019	0.87785	0.98408	TRUE	FALSE	TRUE	TRUE	-0.629559	0.9401	0.310999	-0.491134	0.991264	0.476371	-1.34536	0.998238	0.132557	0.138425	0.993898	0.839882	-0.7158	1	0.412983	-0.854225	0.881561	0.358187	FALSE	FALSE	FALSE	FALSE	FALSE	FALSE
Q13363	CTBP1	C-terminal-binding protein 1	0.96937	0.81397	0.98438	0.80895	TRUE	TRUE	TRUE	TRUE	-0.555089	0.946271	0.359583	-0.313011	0.992355	0.641099	0.32824	0.998981	0.698879	0.242077	0.993202	0.718126	0.883329	1	0.304078	0.641252	0.904177	0.478352	FALSE	FALSE	FALSE	FALSE	FALSE	FALSE
P26232	CTNNA2	Catenin alpha-2	0.97439	0.59339	0.68551	0	TRUE	FALSE	FALSE	FALSE	0.841251	0.910138	0.180361	2.14169	0.938845	0.00522812	2.77693	0.994643	0.0043869	1.30044	0.968187	0.0698574	1.93568	1	0.0358396	0.635246	0.906146	0.49195	FALSE	FALSE	FALSE	FALSE	FALSE	FALSE
P35222	CTNNB1	Catenin beta-1	0.97271	0.85934	0.82712	0	TRUE	TRUE	TRUE	FALSE	0.514767	0.955096	0.456403	2.74071	0.901262	0.00191789	4.75408	0.974263	9.67e-05	2.22594	0.861966	0.00863186	4.23932	1	0.000315982	2.01338	0.64819	0.0625338	FALSE	FALSE	FALSE	FALSE	FALSE	FALSE
Q9UQB3	CTNND2	Catenin delta-2	0.96369	0.86507	0.68551	0	TRUE	TRUE	FALSE	FALSE	0.580779	0.951325	0.410111	2.32552	0.947656	0.00731109	3.00688	0.995286	0.00631347	1.74474	0.949749	0.0359367	2.4261	1	0.0226572	0.681367	0.909661	0.517879	FALSE	FALSE	FALSE	FALSE	FALSE	FALSE
P10619	CTSA	Lysosomal protective protein	0.49501	0.47145	0.68551	0.89658	FALSE	FALSE	FALSE	TRUE	0.344817	0.938758	0.30192	-0.222904	0.991781	0.546602	-0.422099	0.998728	0.369776	-0.567721	0.979532	0.134911	-0.766916	1	0.111859	-0.199195	0.927005	0.687173	FALSE	FALSE	FALSE	FALSE	FALSE	FALSE
P07858	CTSB	Cathepsin B	0.93948	0.51151	0.87386	0.97293	TRUE	FALSE	TRUE	TRUE	0.353713	0.963475	0.599015	-0.310495	0.992558	0.679271	-0.861653	0.998727	0.368682	-0.664208	0.989628	0.380481	-1.21537	1	0.20976	-0.551158	0.917539	0.585029	FALSE	FALSE	FALSE	FALSE	FALSE	FALSE
P53634	CTSC	Dipeptidyl peptidase 1	0.55124	0.60542	0.67988	0.98455	FALSE	FALSE	FALSE	TRUE	0.210316	0.96417	0.614228	-0.293301	0.991669	0.530344	0.0510144	0.99909	0.930867	-0.503617	0.987511	0.286364	-0.159302	1	0.786658	0.344315	0.917268	0.582488	FALSE	FALSE	FALSE	FALSE	FALSE	FALSE
P07339	CTSD	Cathepsin D	0.75632	0.77722	0.72357	0.99394	TRUE	TRUE	FALSE	TRUE	-0.328094	0.924015	0.226082	-0.265689	0.990321	0.375982	-0.729934	0.99779	0.0641326	0.0624052	0.993866	0.833565	-0.40184	1	0.292031	-0.464245	0.847866	0.252444	FALSE	FALSE	FALSE	FALSE	FALSE	FALSE
P08311	CTSG	Cathepsin G	0.86456	0.38444	0.78621	0.84142	TRUE	FALSE	TRUE	TRUE	-0.483655	0.947696	0.372691	-1.97459	0.927366	0.00362995	-1.25886	0.99813	0.109648	-1.49094	0.92743	0.0213024	-0.775207	1	0.31385	0.715731	0.886324	0.379011	FALSE	FALSE	FALSE	FALSE	FALSE	FALSE
O60911	CTSV	Cathepsin L2	0.49197	0.53217	0.09644	0.99236	FALSE	FALSE	FALSE	TRUE	0.162254	0.970204	0.779687	-0.286427	0.992453	0.65925	-1.57566	0.997819	0.0668417	-0.44868	0.991234	0.491442	-1.73792	1	0.0452421	-1.28923	0.782033	0.149787	FALSE	FALSE	FALSE	FALSE	FALSE	FALSE
Q14247	CTTN	Src substrate cortactin	0.80423	0.68551	0	0	TRUE	FALSE	FALSE	FALSE	NA	NA	NA	NA	NA	NA	NA	NA	NA	NA	NA	NA	NA	NA	NA	NA	NA	NA	NA	NA	NA	NA	NA	NA
O60888	CUTA	Protein CutA	0.76513	0.76635	0.92572	0.98892	TRUE	TRUE	TRUE	TRUE	-1.80124	0.782034	0.0529166	-1.47418	0.985654	0.146795	-1.83804	0.998312	0.152328	0.327061	0.993343	0.740509	-0.0367974	1	0.976464	-0.363859	0.934012	0.783507	FALSE	FALSE	FALSE	FALSE	FALSE	FALSE
P00387	CYB5R3	NADH-cytochrome b5 reductase 3	0.98191	0.78333	0.9127	0	TRUE	TRUE	TRUE	FALSE	0.471204	0.940212	0.311779	2.26744	0.748665	0.000285073	3.45523	0.959568	3.87e-05	1.79624	0.660485	0.00227541	2.98403	1	0.000191059	1.18779	0.711487	0.0972628	FALSE	FALSE	FALSE	FALSE	FALSE	FALSE
P08574	CYC1	Cytochrome c1, heme protein, mitochondrial	0.97099	0.48412	0.68551	0.68551	TRUE	FALSE	FALSE	FALSE	-0.233793	0.963453	0.598524	-0.251832	0.99219	0.611863	-1.02144	0.998158	0.11498	-0.0180392	0.994495	0.970901	-0.78765	1	0.217804	-0.769611	0.848839	0.254748	FALSE	FALSE	FALSE	FALSE	FALSE	FALSE
P99999	CYCS	Cytochrome c	0.93167	0.60209	0.95332	0.94947	TRUE	FALSE	TRUE	TRUE	0.240329	0.96532	0.640905	-1.03071	0.98204	0.0853525	-0.405176	0.998909	0.578666	-1.27104	0.951255	0.0375416	-0.645505	1	0.379437	0.625531	0.894748	0.421135	FALSE	FALSE	FALSE	FALSE	FALSE	FALSE
Q7L576	CYFIP1	Cytoplasmic FMR1-interacting protein 1	0.84558	0.76759	0.83969	0.97966	TRUE	TRUE	TRUE	TRUE	0.0908089	0.970944	0.805136	-0.154433	0.9927	0.707778	-0.574434	0.998604	0.277412	-0.245242	0.991893	0.552862	-0.665243	1	0.210948	-0.42	0.899772	0.450108	FALSE	FALSE	FALSE	FALSE	FALSE	FALSE
Q96F07	CYFIP2	Cytoplasmic FMR1-interacting protein 2	0.97599	0.86555	0.80838	0	TRUE	TRUE	TRUE	FALSE	1.02733	0.702054	0.0331745	1.65931	0.927946	0.0036917	2.47944	0.99052	0.000959612	0.631981	0.985195	0.220713	1.4521	1	0.0332565	0.820122	0.840281	0.235584	FALSE	FALSE	FALSE	FALSE	FALSE	FALSE
Q9H0Q0	CYRIA	CYFIP-related Rac1 interactor A	0.92272	0.85368	0.68551	0	TRUE	TRUE	FALSE	FALSE	0.395721	0.950631	0.402462	0.926508	0.982372	0.0892753	1.24733	0.997868	0.0719585	0.530786	0.988319	0.317227	0.851613	1	0.208339	0.320827	0.923724	0.648615	FALSE	FALSE	FALSE	FALSE	FALSE	FALSE
Q9NUQ9	CYRIB	CYFIP-related Rac1 interactor B	0.98636	0.71176	0	0	TRUE	FALSE	FALSE	FALSE	0.955654	0.894166	0.144543	3.20651	0.721459	0.000229579	3.20651	0.992788	0.00194602	2.25085	0.791518	0.00479109	2.25085	1	0.0204583	0	0.945566	1	FALSE	FALSE	FALSE	FALSE	FALSE	FALSE
P07108	DBI	Acyl-CoA-binding protein	0.97531	0.67079	0.68551	0.68551	TRUE	FALSE	FALSE	FALSE	-0.181566	0.966408	0.668019	-0.973242	0.977709	0.0509464	-1.74252	0.99572	0.00835599	-0.791676	0.975998	0.10617	-1.56095	1	0.0162041	-0.769275	0.839475	0.233901	FALSE	FALSE	FALSE	FALSE	FALSE	FALSE
Q16643	DBN1	Drebrin	0.82649	0.78173	0.68551	0.99335	TRUE	TRUE	FALSE	TRUE	1.30461	0.527212	0.0150837	0.901818	0.984084	0.114211	0.25804	0.998988	0.711736	-0.402795	0.990948	0.468073	-1.04657	1	0.145127	-0.643778	0.888419	0.388812	FALSE	FALSE	FALSE	FALSE	FALSE	FALSE
Q9UJU6	DBNL	Drebrin-like protein	0.79989	0.52859	0.68551	0	TRUE	FALSE	FALSE	FALSE	NA	NA	NA	NA	NA	NA	NA	NA	NA	NA	NA	NA	NA	NA	NA	NA	NA	NA	NA	NA	NA	NA	NA	NA
P81605	DCD	Dermcidin	0.57586	0.61249	0.56566	0.90314	FALSE	FALSE	FALSE	TRUE	0.459203	0.950109	0.396875	-0.200678	0.992845	0.738374	-0.789663	0.998646	0.305213	-0.659881	0.987305	0.279277	-1.24887	1	0.112334	-0.588986	0.902552	0.467597	FALSE	FALSE	FALSE	FALSE	FALSE	FALSE
O15075	DCLK1	Serine/threonine-protein kinase DCLK1	0.93995	0.77899	0.83094	0	TRUE	TRUE	TRUE	FALSE	-0.0586583	0.974213	0.936083	2.23726	0.958897	0.0124473	4.4262	0.986252	0.000388753	2.29592	0.881092	0.0106453	4.48486	1	0.0003421	2.18895	0.638076	0.0580654	FALSE	FALSE	FALSE	FALSE	FALSE	FALSE
Q14203	DCTN1	Dynactin subunit 1	0.98505	0.61391	0.68551	0	TRUE	FALSE	FALSE	FALSE	0.928842	0.925003	0.230091	2.64691	0.939301	0.00531253	3.69749	0.993484	0.0025548	1.71807	0.962367	0.054605	2.76865	1	0.0173626	1.05059	0.882313	0.361345	FALSE	FALSE	FALSE	FALSE	FALSE	FALSE
Q13561	DCTN2	Dynactin subunit 2	0.9522	0.72514	0.68551	0	TRUE	FALSE	FALSE	FALSE	0.225392	0.970607	0.793391	2.53924	0.962473	0.0152645	3.62432	0.995511	0.00727141	2.31385	0.935432	0.0251323	3.39893	1	0.0109331	1.08508	0.891643	0.40474	FALSE	FALSE	FALSE	FALSE	FALSE	FALSE
Q9UJW0	DCTN4	Dynactin subunit 4	0.90563	0.4615	0.68551	0	TRUE	FALSE	FALSE	FALSE	NA	NA	NA	NA	NA	NA	NA	NA	NA	NA	NA	NA	NA	NA	NA	NA	NA	NA	NA	NA	NA	NA	NA	NA
Q7Z4W1	DCXR	L-xylulose reductase	0.95522	0.63761	0.78182	0.93335	TRUE	FALSE	TRUE	TRUE	-0.358586	0.959711	0.526668	-0.57152	0.990249	0.369526	-2.05652	0.996647	0.0173523	-0.212934	0.993313	0.73565	-1.69794	1	0.0442694	-1.485	0.700196	0.0914534	FALSE	FALSE	FALSE	FALSE	FALSE	FALSE
O94760	DDAH1	N(G),N(G)-dimethylarginine dimethylaminohydrolase 1	0.8714	0.42361	0.91146	0.89809	TRUE	FALSE	TRUE	TRUE	0.464638	0.921662	0.216997	0.770492	0.980923	0.0738466	1.09366	0.997568	0.0472137	0.305854	0.990858	0.461076	0.629022	1	0.236463	0.323168	0.914839	0.560457	FALSE	FALSE	FALSE	FALSE	FALSE	FALSE
O95865	DDAH2	N(G),N(G)-dimethylarginine dimethylaminohydrolase 2	0.93825	0.80855	0.95794	0.97944	TRUE	TRUE	TRUE	TRUE	-1.37814	0.23337	0.00276146	-1.59592	0.905424	0.00209558	-0.330964	0.998899	0.563992	-0.217777	0.992576	0.630605	1.04718	1	0.0792531	1.26496	0.610979	0.0482605	FALSE	FALSE	FALSE	FALSE	FALSE	FALSE
Q16531	DDB1	DNA damage-binding protein 1	0.97316	0.60423	0.68551	0	TRUE	FALSE	FALSE	FALSE	0.732777	0.927506	0.240826	2.20808	0.93247	0.00423351	2.93975	0.993775	0.00289248	1.47531	0.955168	0.0423522	2.20697	1	0.0186942	0.731666	0.896347	0.430014	FALSE	FALSE	FALSE	FALSE	FALSE	FALSE
P39656	DDOST	Dolichyl-diphosphooligosaccharide--protein glycosyltransferase 48 kDa subunit	0.98827	0.68849	0.81691	0.994	TRUE	FALSE	TRUE	TRUE	-0.0603701	0.972503	0.863525	-0.127499	0.992878	0.745673	-0.461407	0.998715	0.35845	-0.0671291	0.99402	0.864259	-0.401037	1	0.42344	-0.333908	0.910999	0.528349	FALSE	FALSE	FALSE	FALSE	FALSE	FALSE
P30046	DDT	D-dopachrome decarboxylase	0.91146	0.55701	0.90171	0.97882	TRUE	FALSE	TRUE	TRUE	0.180189	0.970862	0.802242	-0.0526295	0.993677	0.947791	-0.234397	0.999041	0.817782	-0.232819	0.993533	0.772315	-0.414586	1	0.684104	-0.181767	0.93898	0.866184	FALSE	FALSE	FALSE	FALSE	FALSE	FALSE
Q92841	DDX17	Probable ATP-dependent RNA helicase DDX17	0.88632	0.64784	0.68551	0	TRUE	FALSE	FALSE	FALSE	NA	NA	NA	NA	NA	NA	NA	NA	NA	NA	NA	NA	NA	NA	NA	NA	NA	NA	NA	NA	NA	NA	NA	NA
Q13838	DDX39B	Spliceosome RNA helicase DDX39B	0.7134	0.88421	0.79303	0	FALSE	TRUE	TRUE	FALSE	0.451159	0.959429	0.521849	1.82075	0.97199	0.029806	3.79427	0.990928	0.00107238	1.36959	0.97376	0.0929311	3.34311	1	0.00300781	1.97352	0.667584	0.0727835	FALSE	FALSE	FALSE	FALSE	FALSE	FALSE
O00571	DDX3X	ATP-dependent RNA helicase DDX3X	0.93462	0.67426	0.68551	0.68551	TRUE	FALSE	FALSE	FALSE	-0.513975	0.949076	0.386201	-0.378893	0.991905	0.565454	0.0747354	0.999089	0.928259	0.135082	0.993884	0.836988	0.58871	1	0.481209	0.453628	0.919865	0.607682	FALSE	FALSE	FALSE	FALSE	FALSE	FALSE
P26196	DDX6	Probable ATP-dependent RNA helicase DDX6	0.94011	0.78503	0.68551	0.68551	TRUE	TRUE	FALSE	FALSE	0.541502	0.914242	0.192099	1.32779	0.95013	0.00812418	0.618522	0.998621	0.28815	0.786286	0.974204	0.0953232	0.0770201	1	0.893116	-0.709266	0.847702	0.252059	FALSE	FALSE	FALSE	FALSE	FALSE	FALSE
Q16698	DECR1	2,4-dienoyl-CoA reductase [(3E)-enoyl-CoA-producing], mitochondrial	0.91716	0.57407	0.68551	0	TRUE	FALSE	FALSE	FALSE	-0.00852082	0.975438	0.994465	2.20933	0.984411	0.120083	3.55131	0.99765	0.0526946	2.21785	0.977724	0.118753	3.55983	1	0.052185	1.34197	0.902868	0.469661	FALSE	FALSE	FALSE	FALSE	FALSE	FALSE
P59665;P59666	DEFA3	Neutrophil defensin 1;Neutrophil defensin 3	0.84841	0.27492	0.93055	0.78653	TRUE	FALSE	TRUE	TRUE	NA	NA	NA	NA	NA	NA	NA	NA	NA	NA	NA	NA	NA	NA	NA	NA	NA	NA	NA	NA	NA	NA	NA	NA
P17661	DES	Desmin	0.83421	0.68487	0.68551	0	TRUE	FALSE	FALSE	FALSE	-0.38381	0.966304	0.665348	1.09141	0.989	0.278007	1.79525	0.998348	0.162942	1.47522	0.980735	0.147846	2.17906	1	0.0943479	0.703836	0.91883	0.59742	FALSE	FALSE	FALSE	FALSE	FALSE	FALSE
O43143	DHX15	ATP-dependent RNA helicase DHX15	0.94385	0.64594	0	0	TRUE	FALSE	FALSE	FALSE	0.992279	0.736907	0.0401097	2.01831	0.847083	0.000787514	2.01831	0.994937	0.00514565	1.02603	0.962858	0.0556602	1.02603	1	0.123233	0	0.945566	1	FALSE	FALSE	FALSE	FALSE	FALSE	FALSE
Q08211	DHX9	ATP-dependent RNA helicase A	0.63101	0.67316	0.06033	0.98843	FALSE	FALSE	FALSE	TRUE	0.592971	0.923744	0.225001	0.18849	0.992783	0.725112	-0.449498	0.998859	0.50924	-0.404481	0.990755	0.453308	-1.04247	1	0.135668	-0.637988	0.886409	0.379396	FALSE	FALSE	FALSE	FALSE	FALSE	FALSE
Q9UBP4	DKK3	Dickkopf-related protein 3	0.9385	0.56976	0.68551	0	TRUE	FALSE	FALSE	FALSE	0.269318	0.969784	0.765832	1.98244	0.979448	0.0618037	3.04774	0.997069	0.0262612	1.71312	0.975413	0.102412	2.77842	1	0.0405419	1.0653	0.897325	0.435598	FALSE	FALSE	FALSE	FALSE	FALSE	FALSE
P10515	DLAT	Dihydrolipoyllysine-residue acetyltransferase component of pyruvate dehydrogenase complex, mitochondrial	0.9841	0.53585	0.83148	0.68551	TRUE	FALSE	TRUE	FALSE	0.454668	0.931318	0.258937	0.716551	0.984278	0.117638	0.0725089	0.999076	0.896889	0.261883	0.99192	0.555666	-0.382159	1	0.497295	-0.644042	0.860575	0.285474	FALSE	FALSE	FALSE	FALSE	FALSE	FALSE
P09622	DLD	Dihydrolipoyl dehydrogenase, mitochondrial	0.9417	0.5328	0.68551	0	TRUE	FALSE	FALSE	FALSE	2.65524	0.26038	0.00324668	3.82866	0.776304	0.000362986	4.80646	0.986279	0.000390534	1.17343	0.984053	0.197049	2.15123	1	0.0679609	0.977802	0.893865	0.416362	FALSE	FALSE	FALSE	FALSE	FALSE	FALSE
Q15700	DLG2	Disks large homolog 2	0.96481	0.81606	0.68551	0	TRUE	TRUE	FALSE	FALSE	0.809674	0.936156	0.285564	2.81109	0.921004	0.00304404	3.59522	0.993698	0.00279791	2.00142	0.936164	0.0255421	2.78555	1	0.0153147	0.784131	0.905364	0.486476	FALSE	FALSE	FALSE	FALSE	FALSE	FALSE
P78352	DLG4	Disks large homolog 4	0.98692	0.52642	0.68551	0	TRUE	FALSE	FALSE	FALSE	2.11086	0.581708	0.0189292	2.92521	0.93751	0.00499238	3.81621	0.994464	0.00400102	0.814345	0.989719	0.38561	1.70535	1	0.158182	0.891001	0.904076	0.477677	FALSE	FALSE	FALSE	FALSE	FALSE	FALSE
P36957	DLST	Dihydrolipoyllysine-residue succinyltransferase component of 2-oxoglutarate dehydrogenase complex, mitochondrial	0.82014	0.84664	0.96263	0.92085	TRUE	TRUE	TRUE	TRUE	-0.523701	0.945054	0.348998	-1.63544	0.962226	0.0150406	-1.55907	0.997719	0.0579678	-1.11174	0.972014	0.0844406	-1.03537	1	0.195515	0.0763623	0.942143	0.926567	FALSE	FALSE	FALSE	FALSE	FALSE	FALSE
Q9UGM3	DMBT1	Deleted in malignant brain tumors 1 protein	0.57027	0.55539	0.76445	0.87017	FALSE	FALSE	TRUE	TRUE	0.927619	0.887683	0.133327	-0.378988	0.991952	0.572829	-2.00001	0.997114	0.0275572	-1.30661	0.965901	0.0630805	-2.92763	1	0.00249017	-1.62102	0.683778	0.0835903	FALSE	FALSE	FALSE	FALSE	FALSE	FALSE
Q6E0U4	DMKN	Dermokine	0.8719	0.04761	0.68551	0.68551	TRUE	FALSE	FALSE	FALSE	0.0613706	0.973731	0.914653	-0.551589	0.99051	0.393727	-0.977119	0.998531	0.236786	-0.612959	0.988929	0.344388	-1.03849	1	0.209751	-0.42553	0.921211	0.621458	FALSE	FALSE	FALSE	FALSE	FALSE	FALSE
Q08495	DMTN	Dematin	0.87365	0.34225	0.68551	0.68551	TRUE	FALSE	FALSE	FALSE	0.563988	0.958485	0.506267	-0.390362	0.992559	0.679567	-0.180669	0.999069	0.879621	-0.95435	0.988343	0.318237	-0.744657	1	0.534576	0.209693	0.939102	0.868381	FALSE	FALSE	FALSE	FALSE	FALSE	FALSE
P31689	DNAJA1	DnaJ homolog subfamily A member 1	0.87452	0.80391	0	0	TRUE	TRUE	FALSE	FALSE	NA	NA	NA	NA	NA	NA	NA	NA	NA	NA	NA	NA	NA	NA	NA	NA	NA	NA	NA	NA	NA	NA	NA	NA
O60884	DNAJA2	DnaJ homolog subfamily A member 2	0.93131	0.69861	0.68551	0	TRUE	FALSE	FALSE	FALSE	1.67332	0.816023	0.0674175	2.47555	0.965959	0.0190352	3.23988	0.99654	0.0157671	0.802233	0.990203	0.415075	1.56656	1	0.214042	0.764332	0.914894	0.560944	FALSE	FALSE	FALSE	FALSE	FALSE	FALSE
P25686	DNAJB2	DnaJ homolog subfamily B member 2	0.86332	0.6078	0.68551	0	TRUE	FALSE	FALSE	FALSE	-0.666868	0.964945	0.632007	1.63081	0.989356	0.300633	3.00267	0.99826	0.138184	2.29767	0.980961	0.150509	3.66953	1	0.0740837	1.37186	0.908957	0.512506	FALSE	FALSE	FALSE	FALSE	FALSE	FALSE
O75061	DNAJC6	Putative tyrosine-protein phosphatase auxilin	0.93002	0.71737	0.68551	0	TRUE	FALSE	FALSE	FALSE	1.13098	0.928933	0.247344	2.41901	0.973673	0.034433	3.41913	0.996789	0.0197937	1.28803	0.985945	0.238973	2.28814	1	0.104301	1.00012	0.905863	0.489957	FALSE	FALSE	FALSE	FALSE	FALSE	FALSE
Q92874	DNASE1L2	Deoxyribonuclease-1-like 2	0.79602	0.2764	0	0	TRUE	FALSE	FALSE	FALSE	NA	NA	NA	NA	NA	NA	NA	NA	NA	NA	NA	NA	NA	NA	NA	NA	NA	NA	NA	NA	NA	NA	NA	NA
Q05193	DNM1	Dynamin-1	0.86119	0.80245	0.69648	0.94241	TRUE	TRUE	FALSE	TRUE	0.393654	0.953801	0.439529	0.293171	0.992149	0.60494	0.612143	0.998757	0.39617	-0.100483	0.993993	0.858804	0.218489	1	0.759955	0.318972	0.925956	0.674446	FALSE	FALSE	FALSE	FALSE	FALSE	FALSE
O00429	DNM1L	Dynamin-1-like protein	0.98386	0.71739	0.92733	0	TRUE	FALSE	TRUE	FALSE	0.299775	0.96485	0.629767	1.11482	0.984413	0.120118	4.30896	0.973891	9.38e-05	0.815046	0.986297	0.248451	4.00918	1	0.000200617	3.19414	0.138434	0.00262721	FALSE	FALSE	FALSE	FALSE	FALSE	FALSE
O43598	DNPH1	2'-deoxynucleoside 5'-phosphate N-hydrolase 1	0.90031	0.60433	0.83897	0	TRUE	FALSE	TRUE	FALSE	0.0018361	0.975512	0.998144	1.07026	0.988188	0.234495	2.53918	0.997278	0.0330777	1.06842	0.9858	0.235267	2.53734	1	0.0331899	1.46892	0.834709	0.224327	FALSE	FALSE	FALSE	FALSE	FALSE	FALSE
Q8N608	DPP10	Inactive dipeptidyl peptidase 10	0.96635	0.84852	0.83902	0	TRUE	TRUE	TRUE	FALSE	0.495083	0.953058	0.430328	1.58225	0.973235	0.0331305	3.29803	0.991575	0.00129587	1.08716	0.979066	0.130396	2.80295	1	0.00461488	1.71579	0.676794	0.0786293	FALSE	FALSE	FALSE	FALSE	FALSE	FALSE
Q9NY33	DPP3	Dipeptidyl peptidase 3	0.86099	0.40924	0.68551	0	TRUE	FALSE	FALSE	FALSE	NA	NA	NA	NA	NA	NA	NA	NA	NA	NA	NA	NA	NA	NA	NA	NA	NA	NA	NA	NA	NA	NA	NA	NA
P42658	DPP6	Dipeptidyl aminopeptidase-like protein 6	0.99109	0.8915	0.92888	0	TRUE	TRUE	TRUE	FALSE	0.0987715	0.973033	0.884985	0.764335	0.989677	0.323267	4.3835	0.982232	0.00021595	0.665563	0.989763	0.388166	4.28473	1	0.000271656	3.61917	0.116561	0.00209977	FALSE	FALSE	FALSE	FALSE	FALSE	FALSE
Q9C005	DPY30	Protein dpy-30 homolog	0.86267	0.86643	0.68551	0	TRUE	TRUE	FALSE	FALSE	NA	NA	NA	NA	NA	NA	NA	NA	NA	NA	NA	NA	NA	NA	NA	NA	NA	NA	NA	NA	NA	NA	NA	NA
Q16555	DPYSL2	Dihydropyrimidinase-related protein 2	0.52133	0.47983	0.83619	0.97911	FALSE	FALSE	TRUE	TRUE	0.518189	0.849064	0.0889041	0.739002	0.973532	0.034006	1.05925	0.996692	0.0180841	0.220813	0.991356	0.501932	0.541058	1	0.200912	0.320245	0.902677	0.468411	FALSE	FALSE	FALSE	FALSE	FALSE	FALSE
Q14195	DPYSL3	Dihydropyrimidinase-related protein 3	0.85658	0.90368	0.92955	0.96545	TRUE	TRUE	TRUE	TRUE	-1.05694	0.29511	0.00398991	-1.06882	0.949684	0.00796797	-0.54298	0.99855	0.246728	-0.0118858	0.994507	0.973923	0.513957	1	0.271973	0.525843	0.861703	0.288743	FALSE	FALSE	FALSE	FALSE	FALSE	FALSE
O14531	DPYSL4	Dihydropyrimidinase-related protein 4	0.84398	0.81403	0.90825	0.94262	TRUE	TRUE	TRUE	TRUE	-1.23256	0.830312	0.0755327	-1.07192	0.986145	0.159677	-0.978276	0.998644	0.303958	0.160646	0.99384	0.828518	0.254287	1	0.786426	0.0936414	0.942065	0.924984	FALSE	FALSE	FALSE	FALSE	FALSE	FALSE
Q9BPU6	DPYSL5	Dihydropyrimidinase-related protein 5	0.96736	0.7956	0.92375	0.87367	TRUE	TRUE	TRUE	TRUE	-0.231011	0.966223	0.663265	-0.768145	0.987493	0.204413	-0.0772407	0.999085	0.917802	-0.537134	0.989425	0.369372	0.15377	1	0.837287	0.690904	0.888464	0.389025	FALSE	FALSE	FALSE	FALSE	FALSE	FALSE
Q08554	DSC1	Desmocollin-1	0.55972	0.66369	0.65296	0.99405	FALSE	FALSE	FALSE	TRUE	0.28511	0.959545	0.523831	-0.242993	0.992272	0.626193	-2.24194	0.992809	0.00196104	-0.528103	0.987769	0.295637	-2.52705	1	0.000701637	-1.99895	0.258713	0.00702182	FALSE	FALSE	FALSE	FALSE	FALSE	FALSE
Q03001	DST	Dystonin	0.69982	0.79435	0.78796	0	FALSE	TRUE	TRUE	FALSE	NA	NA	NA	NA	NA	NA	NA	NA	NA	NA	NA	NA	NA	NA	NA	NA	NA	NA	NA	NA	NA	NA	NA	NA
P60981	DSTN	Destrin	0.93655	0.51689	0.88734	0.68551	TRUE	FALSE	TRUE	FALSE	0.233362	0.967613	0.700394	0.042118	0.993686	0.95037	0.169543	0.999052	0.84306	-0.191244	0.993564	0.777697	-0.0638192	1	0.940565	0.127425	0.940185	0.888402	FALSE	FALSE	FALSE	FALSE	FALSE	FALSE
Q8TEA8	DTD1	D-aminoacyl-tRNA deacylase 1	0.89157	0.45907	0.46952	0.79608	TRUE	FALSE	FALSE	TRUE	0.745165	0.934945	0.278466	-0.590316	0.990945	0.438802	-0.0474968	0.999102	0.96039	-1.33548	0.973189	0.0899974	-0.792661	1	0.411642	0.542819	0.918481	0.594027	FALSE	FALSE	FALSE	FALSE	FALSE	FALSE
Q14204	DYNC1H1	Cytoplasmic dynein 1 heavy chain 1	0.88268	0.85815	0.64527	0.94231	TRUE	TRUE	FALSE	TRUE	-0.185764	0.961516	0.559388	-0.080224	0.993202	0.820885	0.0761738	0.999062	0.865004	0.10554	0.993496	0.765935	0.261938	1	0.560532	0.156398	0.931204	0.742364	FALSE	FALSE	FALSE	FALSE	FALSE	FALSE
O14576	DYNC1I1	Cytoplasmic dynein 1 intermediate chain 1	0.89371	0.72143	0.68551	0	TRUE	FALSE	FALSE	FALSE	NA	NA	NA	NA	NA	NA	NA	NA	NA	NA	NA	NA	NA	NA	NA	NA	NA	NA	NA	NA	NA	NA	NA	NA
Q9Y6G9	DYNC1LI1	Cytoplasmic dynein 1 light intermediate chain 1	0.79787	0.19252	0.68551	0	TRUE	FALSE	FALSE	FALSE	NA	NA	NA	NA	NA	NA	NA	NA	NA	NA	NA	NA	NA	NA	NA	NA	NA	NA	NA	NA	NA	NA	NA	NA
Q96FJ2	DYNLL2	Dynein light chain 2, cytoplasmic	0.6098	0.75475	0.81536	0.68551	FALSE	TRUE	TRUE	FALSE	0.204296	0.967238	0.690026	-1.03979	0.981685	0.0814383	-1.06271	0.998315	0.153232	-1.24409	0.953673	0.0403954	-1.267	1	0.0922965	-0.0229142	0.9445	0.976156	FALSE	FALSE	FALSE	FALSE	FALSE	FALSE
Q9NP97	DYNLRB1	Dynein light chain roadblock-type 1	0.96307	0.63871	0.68551	0.68551	TRUE	FALSE	FALSE	FALSE	0.535238	0.928281	0.24433	0.744136	0.98585	0.151763	-0.0646445	0.999085	0.919279	0.208898	0.99294	0.679383	-0.599882	1	0.352812	-0.808781	0.842809	0.240997	FALSE	FALSE	FALSE	FALSE	FALSE	FALSE
Q13011	ECH1	Delta(3,5)-Delta(2,4)-dienoyl-CoA isomerase, mitochondrial	0.94991	0.59772	0.68551	0	TRUE	FALSE	FALSE	FALSE	0.738525	0.953464	0.435312	1.74256	0.983796	0.109367	2.89677	0.997436	0.0399659	1.00404	0.988937	0.34475	2.15824	1	0.116437	1.15421	0.89392	0.416657	FALSE	FALSE	FALSE	FALSE	FALSE	FALSE
P30084	ECHS1	Enoyl-CoA hydratase, mitochondrial	0.7878	0.80746	0.68551	0.68551	TRUE	TRUE	FALSE	FALSE	0.0408676	0.973957	0.924627	0.102155	0.993249	0.832564	-0.863593	0.998366	0.168735	0.0612874	0.994184	0.899029	-0.904461	1	0.150482	-0.965748	0.780196	0.147921	FALSE	FALSE	FALSE	FALSE	FALSE	FALSE
Q16610	ECM1	Extracellular matrix protein 1	0.61032	0.45895	0.72652	0.96372	FALSE	FALSE	FALSE	TRUE	-0.225064	0.964651	0.625157	-0.249813	0.99228	0.62764	-1.93161	0.995531	0.00736804	-0.0247489	0.994456	0.961547	-1.70655	1	0.0157111	-1.6818	0.484055	0.0233583	FALSE	FALSE	FALSE	FALSE	FALSE	FALSE
Q15075	EEA1	Early endosome antigen 1	0.91567	0.34304	0.68551	0	TRUE	FALSE	FALSE	FALSE	NA	NA	NA	NA	NA	NA	NA	NA	NA	NA	NA	NA	NA	NA	NA	NA	NA	NA	NA	NA	NA	NA	NA	NA
P68104;Q5VTE0	EEF1A1	Elongation factor 1-alpha 1;Putative elongation factor 1-alpha-like 3	0.852	0.79192	0.86693	0.97827	TRUE	TRUE	TRUE	TRUE	NA	NA	NA	NA	NA	NA	NA	NA	NA	NA	NA	NA	NA	NA	NA	NA	NA	NA	NA	NA	NA	NA	NA	NA
Q05639	EEF1A2	Elongation factor 1-alpha 2	0.38711	0.84147	0.57322	0	FALSE	TRUE	FALSE	FALSE	0.473842	0.962199	0.572682	2.4478	0.963306	0.0160566	4.81874	0.98867	0.000617254	1.97396	0.957734	0.046123	4.3449	1	0.00153111	2.37094	0.664873	0.0711951	FALSE	FALSE	FALSE	FALSE	FALSE	FALSE
P24534	EEF1B2	Elongation factor 1-beta	0.91667	0.64842	0.78743	0.98819	TRUE	FALSE	TRUE	TRUE	-0.561324	0.959653	0.525669	-2.27293	0.972334	0.0306723	-1.12229	0.998731	0.372269	-1.71161	0.974036	0.0944082	-0.560965	1	0.652901	1.15064	0.888268	0.388092	FALSE	FALSE	FALSE	FALSE	FALSE	FALSE
P29692	EEF1D	Elongation factor 1-delta	0.93416	0.60486	0.9252	0.68551	TRUE	FALSE	TRUE	FALSE	0.635933	0.888277	0.134291	-0.238547	0.992151	0.605341	0.018032	0.999108	0.975273	-0.87448	0.968131	0.0696746	-0.617901	1	0.295638	0.256579	0.926275	0.678273	FALSE	FALSE	FALSE	FALSE	FALSE	FALSE
P26641	EEF1G	Elongation factor 1-gamma	0.78679	0.72214	0.95213	0.68551	TRUE	FALSE	TRUE	FALSE	0.256231	0.962162	0.571949	-0.49276	0.989834	0.335144	-0.300253	0.998947	0.639094	-0.748991	0.98088	0.149543	-0.556484	1	0.388276	0.192507	0.933543	0.776381	FALSE	FALSE	FALSE	FALSE	FALSE	FALSE
P13639	EEF2	Elongation factor 2	0.73806	0.74622	0.85975	0.38321	FALSE	FALSE	TRUE	FALSE	0.278658	0.94996	0.395306	-0.12925	0.992769	0.722116	-0.297851	0.998866	0.518762	-0.407909	0.986995	0.269124	-0.576509	1	0.218834	-0.168601	0.930271	0.729487	FALSE	FALSE	FALSE	FALSE	FALSE	FALSE
Q12805	EFEMP1	EGF-containing fibulin-like extracellular matrix protein 1	0.89648	0.48492	0.68551	0	TRUE	FALSE	FALSE	FALSE	NA	NA	NA	NA	NA	NA	NA	NA	NA	NA	NA	NA	NA	NA	NA	NA	NA	NA	NA	NA	NA	NA	NA	NA
Q96C19	EFHD2	EF-hand domain-containing protein D2	0.91988	0.84936	0.83654	0.8714	TRUE	TRUE	TRUE	TRUE	-0.159352	0.969559	0.758573	-0.981355	0.983366	0.102667	-0.736071	0.998669	0.321515	-0.822003	0.982221	0.166986	-0.57672	1	0.434888	0.245283	0.931917	0.752476	FALSE	FALSE	FALSE	FALSE	FALSE	FALSE
Q9NZN3	EHD3	EH domain-containing protein 3	0.97848	0.90795	0.68551	0	TRUE	TRUE	FALSE	FALSE	1.68484	0.707365	0.0341112	3.35997	0.835725	0.000681156	4.72749	0.983208	0.000245218	1.67513	0.963205	0.0564298	3.04266	1	0.0089659	1.36752	0.837972	0.230811	FALSE	FALSE	FALSE	FALSE	FALSE	FALSE
Q9UI10	EIF2B4	Translation initiation factor eIF-2B subunit delta	0.55801	0.51862	0.18567	0.989	FALSE	FALSE	FALSE	TRUE	1.36041	0.48919	0.0129323	0.770098	0.986807	0.179722	-0.418658	0.998893	0.556094	-0.590313	0.987853	0.298791	-1.77907	1	0.020072	-1.18876	0.755125	0.125631	FALSE	FALSE	FALSE	FALSE	FALSE	FALSE
P05198	EIF2S1	Eukaryotic translation initiation factor 2 subunit 1	0.87438	0.40282	0.68551	0	TRUE	FALSE	FALSE	FALSE	NA	NA	NA	NA	NA	NA	NA	NA	NA	NA	NA	NA	NA	NA	NA	NA	NA	NA	NA	NA	NA	NA	NA	NA
P41091	EIF2S3	Eukaryotic translation initiation factor 2 subunit 3	0.97511	0.59909	0	0	TRUE	FALSE	FALSE	FALSE	0.947847	0.830846	0.0758665	2.43398	0.78698	0.00040137	2.43398	0.993881	0.00303275	1.48613	0.913171	0.016547	1.48613	1	0.0512231	0	0.945566	1	FALSE	FALSE	FALSE	FALSE	FALSE	FALSE
O15371	EIF3D	Eukaryotic translation initiation factor 3 subunit D	0.79921	0.76862	0	0	TRUE	TRUE	FALSE	FALSE	NA	NA	NA	NA	NA	NA	NA	NA	NA	NA	NA	NA	NA	NA	NA	NA	NA	NA	NA	NA	NA	NA	NA	NA
O00303	EIF3F	Eukaryotic translation initiation factor 3 subunit F	0.93463	0.90101	0.83283	0	TRUE	TRUE	TRUE	FALSE	0.331759	0.963141	0.591906	0.822661	0.988335	0.241671	1.60226	0.997926	0.0786298	0.490902	0.991089	0.479348	1.2705	1	0.156612	0.7796	0.891447	0.40374	FALSE	FALSE	FALSE	FALSE	FALSE	FALSE
Q9Y262	EIF3L	Eukaryotic translation initiation factor 3 subunit L	0.8675	0.80443	0	0	TRUE	TRUE	FALSE	FALSE	NA	NA	NA	NA	NA	NA	NA	NA	NA	NA	NA	NA	NA	NA	NA	NA	NA	NA	NA	NA	NA	NA	NA	NA
Q7L2H7	EIF3M	Eukaryotic translation initiation factor 3 subunit M	0.80344	0.68551	0	0	TRUE	FALSE	FALSE	FALSE	NA	NA	NA	NA	NA	NA	NA	NA	NA	NA	NA	NA	NA	NA	NA	NA	NA	NA	NA	NA	NA	NA	NA	NA
P60842	EIF4A1	Eukaryotic initiation factor 4A-I	0.79655	0.81959	0.82898	0.96048	TRUE	TRUE	TRUE	TRUE	-0.300726	0.962908	0.587064	-1.3108	0.976458	0.0447737	-1.4314	0.99793	0.0790246	-1.01007	0.977093	0.113871	-1.13067	1	0.158684	-0.120601	0.939956	0.88411	FALSE	FALSE	FALSE	FALSE	FALSE	FALSE
Q14240	EIF4A2	Eukaryotic initiation factor 4A-II	0.9641	0.54465	0.68551	0	TRUE	FALSE	FALSE	FALSE	0.770145	0.929571	0.250356	1.83973	0.967089	0.0205584	2.4693	0.996469	0.0148213	1.06958	0.98151	0.157334	1.69915	1	0.0802826	0.629566	0.910658	0.525646	FALSE	FALSE	FALSE	FALSE	FALSE	FALSE
Q15056	EIF4H	Eukaryotic translation initiation factor 4H	0.89612	0.63929	0.83677	0.96256	TRUE	FALSE	TRUE	TRUE	1.1396	0.611414	0.0215351	1.29311	0.966625	0.0199109	0.466508	0.998832	0.475918	0.153505	0.993492	0.765338	-0.673096	1	0.307342	-0.826601	0.842128	0.239518	FALSE	FALSE	FALSE	FALSE	FALSE	FALSE
P63241;Q6IS14;Q9GZV4	EIF5A	Eukaryotic translation initiation factor 5A-1;Eukaryotic translation initiation factor 5A-1-like;Eukaryotic translation initiation factor 5A-2	0.96982	0.46489	0.78935	0	TRUE	FALSE	TRUE	FALSE	NA	NA	NA	NA	NA	NA	NA	NA	NA	NA	NA	NA	NA	NA	NA	NA	NA	NA	NA	NA	NA	NA	NA	NA
P56537	EIF6	Eukaryotic translation initiation factor 6	0.77908	0.49256	0.69891	0.90982	TRUE	FALSE	FALSE	TRUE	0.330259	0.951016	0.406678	-0.0809247	0.993335	0.854371	-1.70044	0.995265	0.00623085	-0.411184	0.989179	0.356584	-2.0307	1	0.00164289	-1.61952	0.367546	0.0123618	FALSE	FALSE	FALSE	FALSE	FALSE	FALSE
P08246	ELANE	Neutrophil elastase	0.85479	0.00873	0.68551	0	TRUE	FALSE	FALSE	FALSE	NA	NA	NA	NA	NA	NA	NA	NA	NA	NA	NA	NA	NA	NA	NA	NA	NA	NA	NA	NA	NA	NA	NA	NA
P26378;Q14576	ELAVL4	ELAV-like protein 4;ELAV-like protein 3	0.96232	0.71091	0.68551	0	TRUE	FALSE	FALSE	FALSE	NA	NA	NA	NA	NA	NA	NA	NA	NA	NA	NA	NA	NA	NA	NA	NA	NA	NA	NA	NA	NA	NA	NA	NA
Q8N766	EMC1	ER membrane protein complex subunit 1	0.87705	0.81463	0	0	TRUE	TRUE	FALSE	FALSE	0.874004	0.9174	0.202063	2.33726	0.939265	0.00530583	2.33726	0.996901	0.0220837	1.46326	0.965806	0.0628224	1.46326	1	0.134396	0	0.945566	1	FALSE	FALSE	FALSE	FALSE	FALSE	FALSE
Q6ZMW3	EML6	Echinoderm microtubule-associated protein-like 6	0.84782	0.75761	0.74524	0.68551	TRUE	TRUE	FALSE	FALSE	-0.461553	0.959674	0.526043	0.162907	0.993281	0.840549	0.423918	0.998971	0.679507	0.62446	0.990629	0.444096	0.885471	1	0.391935	0.261011	0.935705	0.81017	FALSE	FALSE	FALSE	FALSE	FALSE	FALSE
O94919	ENDOD1	Endonuclease domain-containing 1 protein	0.74508	0.83988	0.97983	0.93003	FALSE	TRUE	TRUE	TRUE	-0.382498	0.949063	0.386071	0.181045	0.992717	0.71127	-0.0995584	0.999065	0.871958	0.563543	0.986596	0.256974	0.282939	1	0.64777	-0.280604	0.925509	0.669135	FALSE	FALSE	FALSE	FALSE	FALSE	FALSE
P06733	ENO1	Alpha-enolase	0.55105	0.76773	0.78813	0.99293	FALSE	TRUE	TRUE	TRUE	0.323212	0.943495	0.336214	0.449786	0.988189	0.234557	0.615518	0.99845	0.199913	0.126575	0.993298	0.733311	0.292306	1	0.535446	0.165732	0.930997	0.739472	FALSE	FALSE	FALSE	FALSE	FALSE	FALSE
P09104	ENO2	Gamma-enolase	0.72211	0.83789	0.75902	0.9879	FALSE	TRUE	TRUE	TRUE	0.453693	0.933302	0.269315	0.62423	0.986745	0.177701	0.87032	0.998265	0.139445	0.170537	0.993123	0.706098	0.416627	1	0.468819	0.24609	0.926839	0.685129	FALSE	FALSE	FALSE	FALSE	FALSE	FALSE
P13929	ENO3	Beta-enolase	0.50664	0.77271	0.6271	0.71054	FALSE	TRUE	FALSE	FALSE	0.649874	0.921442	0.216181	0.76654	0.987192	0.193022	1.39818	0.997819	0.0668678	0.116666	0.993895	0.839275	0.748302	1	0.310497	0.631636	0.894014	0.417162	FALSE	FALSE	FALSE	FALSE	FALSE	FALSE
Q9UHY7	ENOPH1	Enolase-phosphatase E1	0.98714	0.77682	0.92885	0.68551	TRUE	TRUE	TRUE	FALSE	0.082523	0.971594	0.82868	0.535265	0.987843	0.218854	-0.491254	0.998726	0.367547	0.452742	0.987764	0.295459	-0.573777	1	0.294563	-1.02652	0.686829	0.0851948	FALSE	FALSE	FALSE	FALSE	FALSE	FALSE
Q6UWR7	ENPP6	Glycerophosphocholine cholinephosphodiesterase ENPP6	0.97372	0.89176	0.74179	0.98979	TRUE	TRUE	FALSE	TRUE	-0.0556689	0.973272	0.894981	-0.468231	0.989729	0.327129	0.454665	0.998809	0.449411	-0.412562	0.989734	0.386495	0.510334	1	0.396851	0.922896	0.788029	0.156143	FALSE	FALSE	FALSE	FALSE	FALSE	FALSE
Q9H4G0	EPB41L1	Band 4.1-like protein 1	0.98465	0.78292	0.83653	0	TRUE	TRUE	TRUE	FALSE	0.132089	0.972912	0.880034	1.32608	0.986994	0.18603	3.54578	0.995884	0.00937428	1.194	0.985656	0.231651	3.41369	1	0.0118401	2.21969	0.722401	0.103399	FALSE	FALSE	FALSE	FALSE	FALSE	FALSE
O43491	EPB41L2	Band 4.1-like protein 2	0.98212	0.56718	0.68551	0	TRUE	FALSE	FALSE	FALSE	0.875186	0.893625	0.143546	3.40771	0.450656	4.5e-05	4.42486	0.956324	3.33e-05	2.53252	0.472125	0.000911294	3.54967	1	0.000350922	1.01715	0.847453	0.251477	FALSE	FALSE	FALSE	FALSE	FALSE	FALSE
Q9Y2J2	EPB41L3	Band 4.1-like protein 3	0.96833	0.73132	0.96156	0.68551	TRUE	FALSE	TRUE	FALSE	-0.239965	0.961961	0.567976	-0.647092	0.98674	0.177542	-1.24248	0.997567	0.0471527	-0.407127	0.989778	0.388989	-1.00251	1	0.102773	-0.595387	0.879228	0.348664	FALSE	FALSE	FALSE	FALSE	FALSE	FALSE
Q9UM22	EPDR1	Mammalian ependymin-related protein 1	0.98005	0.81151	0.96939	0.90684	TRUE	TRUE	TRUE	TRUE	-0.352917	0.938369	0.29937	-0.381156	0.989572	0.315623	-0.369375	0.9988	0.439353	-0.0282388	0.994365	0.939891	-0.0164576	1	0.972282	0.0117811	0.944733	0.981291	FALSE	FALSE	FALSE	FALSE	FALSE	FALSE
P54764	EPHA4	Ephrin type-A receptor 4	0.95834	0.91347	0.68551	0	TRUE	TRUE	FALSE	FALSE	1.28959	0.746406	0.0423775	2.61244	0.857864	0.000913156	3.1111	0.992103	0.00153281	1.32285	0.964844	0.0603183	1.82151	1	0.0426049	0.49866	0.917049	0.580438	FALSE	FALSE	FALSE	FALSE	FALSE	FALSE
P07099	EPHX1	Epoxide hydrolase 1	0.98297	0.79719	0.68551	0	TRUE	TRUE	FALSE	FALSE	0.482447	0.955106	0.456533	2.66035	0.886409	0.00143971	3.31495	0.992289	0.00163147	2.1779	0.831732	0.00652132	2.83251	1	0.00539206	0.654606	0.907273	0.50002	FALSE	FALSE	FALSE	FALSE	FALSE	FALSE
Q9Y6I3	EPN1	Epsin-1	0.91573	0.51753	0.68551	0	TRUE	FALSE	FALSE	FALSE	NA	NA	NA	NA	NA	NA	NA	NA	NA	NA	NA	NA	NA	NA	NA	NA	NA	NA	NA	NA	NA	NA	NA	NA
Q9UBC2	EPS15L1	Epidermal growth factor receptor substrate 15-like 1	0.90198	0.72925	0	0	TRUE	FALSE	FALSE	FALSE	-1.04965	0.927435	0.240511	2.14273	0.975234	0.0397333	2.14273	0.998056	0.0967234	3.19238	0.761761	0.00393768	3.19238	1	0.0176542	0	0.945566	1	FALSE	FALSE	FALSE	FALSE	FALSE	FALSE
P84090	ERH	Enhancer of rudimentary homolog	0.86558	0.40266	0.68551	0	TRUE	FALSE	FALSE	FALSE	NA	NA	NA	NA	NA	NA	NA	NA	NA	NA	NA	NA	NA	NA	NA	NA	NA	NA	NA	NA	NA	NA	NA	NA
O94905	ERLIN2	Erlin-2	0.78379	0.85953	0.68551	0	TRUE	TRUE	FALSE	FALSE	NA	NA	NA	NA	NA	NA	NA	NA	NA	NA	NA	NA	NA	NA	NA	NA	NA	NA	NA	NA	NA	NA	NA	NA
Q8TAM6	ERMN	Ermin	0.78028	0.34459	0	0	TRUE	FALSE	FALSE	FALSE	NA	NA	NA	NA	NA	NA	NA	NA	NA	NA	NA	NA	NA	NA	NA	NA	NA	NA	NA	NA	NA	NA	NA	NA
P30040	ERP29	Endoplasmic reticulum resident protein 29	0.97035	0.75414	0.83745	0.68551	TRUE	TRUE	TRUE	FALSE	0.486413	0.940378	0.312939	-0.281905	0.992102	0.597094	1.00531	0.998292	0.146525	-0.768318	0.981687	0.159657	0.5189	1	0.443762	1.28722	0.683719	0.0835458	FALSE	FALSE	FALSE	FALSE	FALSE	FALSE
P10768	ESD	S-formylglutathione hydrolase	0.89676	0.81313	0.81319	0	TRUE	TRUE	TRUE	FALSE	1.07379	0.908682	0.17649	2.40256	0.957251	0.0114064	4.44828	0.988789	0.000633251	1.32877	0.979722	0.136818	3.37449	1	0.005802	2.04571	0.698799	0.0907694	FALSE	FALSE	FALSE	FALSE	FALSE	FALSE
Q9BSJ8	ESYT1	Extended synaptotagmin-1	0.82555	0.5564	0	0	TRUE	FALSE	FALSE	FALSE	NA	NA	NA	NA	NA	NA	NA	NA	NA	NA	NA	NA	NA	NA	NA	NA	NA	NA	NA	NA	NA	NA	NA	NA
P13804	ETFA	Electron transfer flavoprotein subunit alpha, mitochondrial	0.98206	0.78755	0.83946	0.98495	TRUE	TRUE	TRUE	TRUE	0.111429	0.969159	0.745962	-0.171668	0.992435	0.655721	-0.224992	0.99895	0.644194	-0.283097	0.9909	0.464339	-0.33642	1	0.491428	-0.0533233	0.941694	0.917572	FALSE	FALSE	FALSE	FALSE	FALSE	FALSE
P38117	ETFB	Electron transfer flavoprotein subunit beta	0.79542	0.69321	0.83491	0.68551	TRUE	FALSE	TRUE	FALSE	-0.0319917	0.974172	0.934254	-0.446874	0.989489	0.309718	-0.470393	0.998757	0.395838	-0.414882	0.988936	0.344681	-0.438401	1	0.428141	-0.0235189	0.944114	0.967747	FALSE	FALSE	FALSE	FALSE	FALSE	FALSE
Q92817	EVPL	Envoplakin	0.79752	0.45992	0.83956	0.98948	TRUE	FALSE	TRUE	TRUE	0.7846	0.752515	0.0439408	-0.521998	0.987724	0.213796	-0.717554	0.998394	0.178335	-1.3066	0.787472	0.00465872	-1.50215	1	0.00886736	-0.195556	0.929805	0.723182	FALSE	FALSE	FALSE	FALSE	FALSE	FALSE
Q01844	EWSR1	RNA-binding protein EWS	0.80227	0.15594	0.68551	0	TRUE	FALSE	FALSE	FALSE	NA	NA	NA	NA	NA	NA	NA	NA	NA	NA	NA	NA	NA	NA	NA	NA	NA	NA	NA	NA	NA	NA	NA	NA
P15311	EZR	Ezrin	0.98575	0.61044	0.68551	0	TRUE	FALSE	FALSE	FALSE	0.972864	0.909896	0.179707	2.50143	0.936484	0.00482208	3.5864	0.992665	0.00186112	1.52857	0.966726	0.0653899	2.61354	1	0.0161797	1.08498	0.869494	0.313111	FALSE	FALSE	FALSE	FALSE	FALSE	FALSE
P00734	F2	Prothrombin	0.87767	0.7881	0.88745	0	TRUE	TRUE	TRUE	FALSE	-0.38023	0.965301	0.640462	-0.509196	0.991975	0.576372	1.9472	0.99809	0.102434	-0.128966	0.994128	0.887012	2.32743	1	0.0544663	2.45639	0.631843	0.0555546	FALSE	FALSE	FALSE	FALSE	FALSE	FALSE
P05413	FABP3	Fatty acid-binding protein, heart	0.97444	0.78813	0.97723	0.89105	TRUE	TRUE	TRUE	TRUE	-0.493374	0.944951	0.34813	-1.33537	0.972623	0.0314306	-0.906304	0.998511	0.226799	-0.841991	0.98161	0.158634	-0.41293	1	0.575663	0.429062	0.917365	0.583395	FALSE	FALSE	FALSE	FALSE	FALSE	FALSE
Q01469	FABP5	Fatty acid-binding protein 5	0.73196	0.59041	0.86781	0.38174	FALSE	FALSE	TRUE	FALSE	-0.433035	0.949433	0.389831	-0.478546	0.990526	0.395228	-2.30738	0.99435	0.0037797	-0.0455111	0.994343	0.934904	-1.87435	1	0.014687	-1.82884	0.482455	0.0231355	FALSE	FALSE	FALSE	FALSE	FALSE	FALSE
O15540	FABP7	Fatty acid-binding protein, brain	0.87014	0.87137	0.96638	0.9219	TRUE	TRUE	TRUE	TRUE	-1.13067	0.465216	0.0116974	-0.887285	0.979828	0.0646188	-0.109434	0.999056	0.850009	0.243381	0.99229	0.59601	1.02123	1	0.0901327	0.777851	0.829617	0.214777	FALSE	FALSE	FALSE	FALSE	FALSE	FALSE
Q9NSD9	FARSB	Phenylalanine--tRNA ligase beta subunit	0.97471	0.84382	0.96609	0.68551	TRUE	TRUE	TRUE	FALSE	-0.593366	0.884651	0.128579	-0.947597	0.973951	0.0352993	-2.26715	0.986719	0.000421741	-0.354231	0.990065	0.406275	-1.67378	1	0.00518856	-1.31955	0.52726	0.0296212	FALSE	FALSE	FALSE	FALSE	FALSE	FALSE
P49327	FASN	Fatty acid synthase	0.86696	0.76332	0.70971	0.68551	TRUE	TRUE	FALSE	FALSE	0.198704	0.960924	0.548271	0.24756	0.991479	0.504015	0.240448	0.998927	0.606978	0.0488558	0.994163	0.894457	0.0417437	1	0.928584	-0.00711207	0.945058	0.988512	FALSE	FALSE	FALSE	FALSE	FALSE	FALSE
Q8WUP2	FBLIM1	Filamin-binding LIM protein 1	0.48827	0.51862	0.25373	0.91017	FALSE	FALSE	FALSE	TRUE	-0.512556	0.936581	0.288131	-0.401697	0.991069	0.452897	-1.4059	0.997577	0.047808	0.110858	0.993872	0.834704	-0.893343	1	0.194035	-1.0042	0.799796	0.169899	FALSE	FALSE	FALSE	FALSE	FALSE	FALSE
P23142	FBLN1	Fibulin-1	0.97616	0.53592	0.68551	0	TRUE	FALSE	FALSE	FALSE	0.583012	0.944043	0.340613	1.65034	0.968819	0.0232646	2.31814	0.996318	0.0130575	1.06733	0.978618	0.126304	1.73513	1	0.0540782	0.667805	0.902062	0.464438	FALSE	FALSE	FALSE	FALSE	FALSE	FALSE
P35555	FBN1	Fibrillin-1	0.93183	0.64984	0.68551	0.68551	TRUE	FALSE	FALSE	FALSE	1.46371	0.764032	0.0471392	1.63544	0.976992	0.0472654	0.470609	0.998944	0.634066	0.171726	0.993825	0.825665	-0.993104	1	0.320353	-1.16483	0.856168	0.27326	FALSE	FALSE	FALSE	FALSE	FALSE	FALSE
Q9UK22	FBXO2	F-box only protein 2	0.84331	0.77062	0.9168	0.68551	TRUE	TRUE	TRUE	FALSE	-0.430073	0.945646	0.354082	-0.771938	0.985542	0.144049	0.64082	0.998679	0.329509	-0.341865	0.991418	0.507463	1.07089	1	0.111175	1.41276	0.62134	0.051687	FALSE	FALSE	FALSE	FALSE	FALSE	FALSE
Q6PJ61	FBXO46	F-box only protein 46	0.70749	0.65662	0.51844	0.97776	FALSE	FALSE	FALSE	TRUE	-0.0305579	0.974713	0.959213	-0.625044	0.990083	0.355272	-0.913429	0.99862	0.28742	-0.594486	0.989597	0.378743	-0.882871	1	0.303354	-0.288385	0.931602	0.747984	FALSE	FALSE	FALSE	FALSE	FALSE	FALSE
Q9Y6R7	FCGBP	IgGFc-binding protein	0.97229	0.62446	0.97965	0.68551	TRUE	FALSE	TRUE	FALSE	-0.587242	0.863028	0.101646	-1.15458	0.946995	0.00711455	-0.698139	0.998352	0.164259	-0.567338	0.981199	0.153405	-0.110897	1	0.820476	0.456441	0.887252	0.383299	FALSE	FALSE	FALSE	FALSE	FALSE	FALSE
P14324	FDPS	Farnesyl pyrophosphate synthase	0.95294	0.8821	0.88322	0.95731	TRUE	TRUE	TRUE	TRUE	-0.390575	0.958647	0.508886	-0.195048	0.992973	0.76684	0.822459	0.998679	0.328861	0.195527	0.993498	0.766285	1.21303	1	0.156048	1.01751	0.849774	0.256994	FALSE	FALSE	FALSE	FALSE	FALSE	FALSE
Q96AC1	FERMT2	Fermitin family homolog 2	0.89917	0.79273	0	0	TRUE	TRUE	FALSE	FALSE	1.53482	0.907279	0.17289	3.58373	0.950535	0.0082702	3.58373	0.997213	0.0307372	2.04892	0.976171	0.10733	2.04892	1	0.196996	0	0.945566	1	FALSE	FALSE	FALSE	FALSE	FALSE	FALSE
P02671	FGA	Fibrinogen alpha chain	0.77909	0.53506	0.83661	0	TRUE	FALSE	TRUE	FALSE	-0.162486	0.972384	0.858847	0.77338	0.991065	0.452398	2.64738	0.997642	0.0521424	0.935867	0.989341	0.364936	2.80987	1	0.0405207	1.874	0.809152	0.182245	FALSE	FALSE	FALSE	FALSE	FALSE	FALSE
P02675	FGB	Fibrinogen beta chain	0.64176	0.51668	0.8043	0	FALSE	FALSE	TRUE	FALSE	1.57441	0.899898	0.155876	1.12314	0.990107	0.35723	3.67929	0.997016	0.0248238	-0.451268	0.99314	0.708675	2.10488	1	0.178478	2.55615	0.755976	0.126301	FALSE	FALSE	FALSE	FALSE	FALSE	FALSE
P02679	FGG	Fibrinogen gamma chain	0.81971	0.67013	0.8397	0.68551	TRUE	FALSE	TRUE	FALSE	1.28492	0.421198	0.00864599	0.210139	0.99252	0.671936	-0.323849	0.998927	0.606316	-1.07478	0.95404	0.0408603	-1.60877	1	0.017817	-0.533987	0.895537	0.425475	FALSE	FALSE	FALSE	FALSE	FALSE	FALSE
Q13642	FHL1	Four and a half LIM domains protein 1	0.93861	0.64783	0.68551	0	TRUE	FALSE	FALSE	FALSE	0.134912	0.973157	0.890168	1.76763	0.984296	0.117978	2.70106	0.997775	0.0627561	1.63272	0.980642	0.146767	2.56615	1	0.0757465	0.933431	0.910752	0.526392	FALSE	FALSE	FALSE	FALSE	FALSE	FALSE
P62942	FKBP1A	Peptidyl-prolyl cis-trans isomerase FKBP1A	0.98133	0.64749	0.68551	0	TRUE	FALSE	FALSE	FALSE	0.565188	0.938875	0.302694	3.04272	0.537197	7.17e-05	3.86812	0.969453	6.78e-05	2.47753	0.406341	0.000579922	3.30293	1	0.000351767	0.825403	0.870135	0.315266	FALSE	FALSE	FALSE	FALSE	FALSE	FALSE
P26885	FKBP2	Peptidyl-prolyl cis-trans isomerase FKBP2	0.92371	0.82658	0.78984	0	TRUE	TRUE	TRUE	FALSE	1.01014	0.948975	0.385188	1.77549	0.986776	0.178687	4.21692	0.996627	0.0170276	0.765344	0.991904	0.553952	3.20678	1	0.060981	2.44143	0.798773	0.16863	FALSE	FALSE	FALSE	FALSE	FALSE	FALSE
Q02790	FKBP4	Peptidyl-prolyl cis-trans isomerase FKBP4	0.80604	0.4685	0.68551	0	TRUE	FALSE	FALSE	FALSE	NA	NA	NA	NA	NA	NA	NA	NA	NA	NA	NA	NA	NA	NA	NA	NA	NA	NA	NA	NA	NA	NA	NA	NA
P21333	FLNA	Filamin-A	0.71434	0.70481	0.69974	0.95179	FALSE	FALSE	FALSE	TRUE	-0.218864	0.965204	0.638133	-0.928729	0.982097	0.0860135	-1.16441	0.998002	0.0885934	-0.709865	0.983203	0.182056	-0.945548	1	0.16105	-0.235683	0.930692	0.735254	FALSE	FALSE	FALSE	FALSE	FALSE	FALSE
O75369	FLNB	Filamin-B	0.76531	0.77874	0.98348	0.99244	TRUE	TRUE	TRUE	TRUE	-0.192629	0.963238	0.593966	-0.498208	0.987989	0.225274	-0.441322	0.998752	0.390828	-0.305579	0.990727	0.451221	-0.248693	1	0.626263	0.0568865	0.941619	0.91609	FALSE	FALSE	FALSE	FALSE	FALSE	FALSE
Q14315	FLNC	Filamin-C	0.90524	0.59304	0.68551	0	TRUE	FALSE	FALSE	FALSE	-0.17256	0.972166	0.850329	1.63041	0.984565	0.122994	2.58739	0.997712	0.0573361	1.80297	0.973259	0.0903483	2.75995	1	0.0439685	0.956977	0.905602	0.488133	FALSE	FALSE	FALSE	FALSE	FALSE	FALSE
O75955	FLOT1	Flotillin-1	0.98829	0.88118	0.91001	0.68551	TRUE	TRUE	TRUE	FALSE	0.29447	0.958142	0.500812	-0.875517	0.98194	0.0842274	-0.196058	0.999008	0.750089	-1.16999	0.935377	0.0251022	-0.490528	1	0.42892	0.679459	0.866865	0.304521	FALSE	FALSE	FALSE	FALSE	FALSE	FALSE
Q14254	FLOT2	Flotillin-2	0.33786	0.79754	0.68551	0	FALSE	TRUE	FALSE	FALSE	0.75777	0.922563	0.2204	2.93195	0.770705	0.00034494	3.93103	0.981293	0.000192538	2.17418	0.776883	0.00433842	3.17326	1	0.00142126	0.999079	0.858333	0.279151	FALSE	FALSE	FALSE	FALSE	FALSE	FALSE
P02751	FN1	Fibronectin	0.90687	0.73597	0.99281	0.68551	TRUE	FALSE	TRUE	FALSE	-0.334775	0.958039	0.499185	-0.239492	0.99248	0.66426	-2.30901	0.994149	0.0034308	0.0952832	0.994011	0.862596	-1.97424	1	0.0100024	-2.06952	0.340392	0.0107551	FALSE	FALSE	FALSE	FALSE	FALSE	FALSE
Q9H479	FN3K	Fructosamine-3-kinase	0.92363	0.66356	0.68551	0	TRUE	FALSE	FALSE	FALSE	0.500511	0.961699	0.562881	2.19988	0.972972	0.0323852	3.10803	0.996716	0.018482	1.69937	0.973226	0.0901817	2.60752	1	0.0434177	0.908153	0.905145	0.484962	FALSE	FALSE	FALSE	FALSE	FALSE	FALSE
Q16658	FSCN1	Fascin	0.84685	0.83562	0.89159	0.93741	TRUE	TRUE	TRUE	TRUE	-0.568983	0.91072	0.181949	-0.632883	0.986938	0.184089	-0.0235161	0.999105	0.968087	-0.0639002	0.994145	0.890654	0.545466	1	0.359123	0.609367	0.875614	0.334721	FALSE	FALSE	FALSE	FALSE	FALSE	FALSE
P02794	FTH1	Ferritin heavy chain	0.32581	0.84531	0.96642	0.99403	FALSE	TRUE	TRUE	TRUE	-0.970055	0.890988	0.138851	-0.516264	0.991217	0.470586	-0.230146	0.999032	0.798007	0.453791	0.991612	0.525255	0.739909	1	0.41459	0.286117	0.93273	0.764278	FALSE	FALSE	FALSE	FALSE	FALSE	FALSE
Q96AE4	FUBP1	Far upstream element-binding protein 1	0.99291	0.85735	0.83837	0	TRUE	TRUE	TRUE	FALSE	0.329163	0.96227	0.57408	2.17866	0.923348	0.00324204	3.13102	0.991196	0.00115771	1.8495	0.875482	0.00997809	2.80186	1	0.00285855	0.952364	0.860056	0.283988	FALSE	FALSE	FALSE	FALSE	FALSE	FALSE
P04066	FUCA1	Tissue alpha-L-fucosidase	0.90861	0.43941	0.68551	0	TRUE	FALSE	FALSE	FALSE	NA	NA	NA	NA	NA	NA	NA	NA	NA	NA	NA	NA	NA	NA	NA	NA	NA	NA	NA	NA	NA	NA	NA	NA
P11413	G6PD	Glucose-6-phosphate 1-dehydrogenase	0.98704	0.85093	0.80755	0	TRUE	TRUE	TRUE	FALSE	-0.10905	0.972347	0.857363	2.05412	0.944849	0.00652862	3.86134	0.982903	0.000235467	2.16317	0.784355	0.00456063	3.97039	1	0.000177167	1.80722	0.640414	0.0590528	FALSE	FALSE	FALSE	FALSE	FALSE	FALSE
P10253	GAA	Lysosomal alpha-glucosidase	0.80467	0.8272	0.88785	0.99266	TRUE	TRUE	TRUE	TRUE	-0.533253	0.942332	0.327191	-1.7511	0.950809	0.00837141	-1.56571	0.997624	0.0508931	-1.21785	0.962249	0.0543551	-1.03246	1	0.184775	0.185396	0.936189	0.81807	FALSE	FALSE	FALSE	FALSE	FALSE	FALSE
P60520	GABARAPL2	Gamma-aminobutyric acid receptor-associated protein-like 2	0.98861	0.73986	0.68551	0	TRUE	FALSE	FALSE	FALSE	1.40732	0.73574	0.0398438	2.91697	0.83247	0.000654607	3.86657	0.986724	0.00042205	1.50965	0.958655	0.0476193	2.45925	1	0.0134999	0.949597	0.874969	0.332329	FALSE	FALSE	FALSE	FALSE	FALSE	FALSE
O75899	GABBR2	Gamma-aminobutyric acid type B receptor subunit 2	0.91928	0.73113	0	0	TRUE	FALSE	FALSE	FALSE	NA	NA	NA	NA	NA	NA	NA	NA	NA	NA	NA	NA	NA	NA	NA	NA	NA	NA	NA	NA	NA	NA	NA	NA
Q14697	GANAB	Neutral alpha-glucosidase AB	0.96667	0.79735	0.8369	0.68551	TRUE	TRUE	TRUE	FALSE	0.236105	0.963511	0.599771	-0.0629242	0.993508	0.900096	1.1961	0.997865	0.0716325	-0.299029	0.991891	0.552668	0.959999	1	0.141903	1.25903	0.668983	0.0736253	FALSE	FALSE	FALSE	FALSE	FALSE	FALSE
P17677	GAP43	Neuromodulin	0.92467	0.40904	0.68551	0	TRUE	FALSE	FALSE	FALSE	1.45748	0.822418	0.0708643	2.04475	0.970718	0.0268894	3.04953	0.996079	0.010823	0.587269	0.991311	0.497973	1.59205	1	0.155462	1.00478	0.888534	0.38936	FALSE	FALSE	FALSE	FALSE	FALSE	FALSE
P41250	GARS1	Glycine--tRNA ligase	0.79732	0.93888	0.96357	0.68551	TRUE	TRUE	TRUE	FALSE	-0.277503	0.9574	0.489326	-0.458812	0.989498	0.310363	-0.12998	0.999041	0.817807	-0.18131	0.992979	0.684871	0.147522	1	0.793784	0.328832	0.917429	0.583998	FALSE	FALSE	FALSE	FALSE	FALSE	FALSE
Q9Y2T3	GDA	Guanine deaminase	0.80215	0.85791	0.84282	0.99223	TRUE	TRUE	TRUE	TRUE	-0.384312	0.925608	0.232613	-0.13101	0.992715	0.71089	-0.153613	0.998999	0.731084	0.253302	0.991046	0.4759	0.230699	1	0.606497	-0.0226034	0.943843	0.96191	FALSE	FALSE	FALSE	FALSE	FALSE	FALSE
P31150	GDI1	Rab GDP dissociation inhibitor alpha	0.8445	0.8536	0.64554	0.42398	TRUE	TRUE	FALSE	FALSE	0.0829439	0.971153	0.812576	0.0271524	0.993666	0.944612	0.529833	0.998626	0.291397	-0.0557915	0.994126	0.886511	0.446889	1	0.371388	0.50268	0.877997	0.343811	FALSE	FALSE	FALSE	FALSE	FALSE	FALSE
P50395	GDI2	Rab GDP dissociation inhibitor beta	0.6319	0.87851	0.60194	0.9845	FALSE	TRUE	FALSE	TRUE	-0.853403	0.70158	0.0330927	-0.643586	0.985241	0.137051	0.370748	0.998842	0.487649	0.209818	0.992476	0.618146	1.22415	1	0.030945	1.01433	0.684476	0.0841138	FALSE	FALSE	FALSE	FALSE	FALSE	FALSE
Q7L5L3	GDPD3	Lysophospholipase D GDPD3	0.42886	0.4319	0.79061	0.99371	FALSE	FALSE	TRUE	TRUE	-1.17226	0.852652	0.0919135	-2.10487	0.955416	0.010392	-4.14699	0.984688	0.000302673	-0.932604	0.985227	0.221449	-2.97473	1	0.00499881	-2.04212	0.625977	0.0533419	FALSE	FALSE	FALSE	FALSE	FALSE	FALSE
P14136	GFAP	Glial fibrillary acidic protein	0.66524	0.67024	0.82578	0.78506	FALSE	FALSE	TRUE	TRUE	0.69422	0.79733	0.0587553	0.237896	0.991765	0.544156	1.31037	0.99647	0.0148334	-0.456324	0.986389	0.251023	0.616146	1	0.221624	1.07247	0.622962	0.052257	FALSE	FALSE	FALSE	FALSE	FALSE	FALSE
O00451	GFRA2	GDNF family receptor alpha-2	0.86176	0.82921	0.68551	0	TRUE	TRUE	FALSE	FALSE	NA	NA	NA	NA	NA	NA	NA	NA	NA	NA	NA	NA	NA	NA	NA	NA	NA	NA	NA	NA	NA	NA	NA	NA
O75223	GGCT	Gamma-glutamylcyclotransferase	0.74319	0.53804	0.68101	0.91244	FALSE	FALSE	FALSE	TRUE	0.337324	0.961771	0.564279	-0.469167	0.991248	0.47439	-2.16293	0.996542	0.0157848	-0.806491	0.985385	0.225122	-2.50025	1	0.0064392	-1.69376	0.652923	0.0648136	FALSE	FALSE	FALSE	FALSE	FALSE	FALSE
Q92820	GGH	Gamma-glutamyl hydrolase	0.67849	0.55671	0.75186	0.93063	FALSE	FALSE	TRUE	TRUE	0.25428	0.965852	0.65394	-0.271814	0.9925	0.668127	-0.698845	0.998748	0.387317	-0.526094	0.990123	0.409942	-0.953125	1	0.242518	-0.427031	0.920683	0.615987	FALSE	FALSE	FALSE	FALSE	FALSE	FALSE
P17302	GJA1	Gap junction alpha-1 protein	0.85507	0.68551	0	0	TRUE	FALSE	FALSE	FALSE	NA	NA	NA	NA	NA	NA	NA	NA	NA	NA	NA	NA	NA	NA	NA	NA	NA	NA	NA	NA	NA	NA	NA	NA
P16278	GLB1	Beta-galactosidase	0.70399	0.86818	0	0	FALSE	TRUE	FALSE	FALSE	NA	NA	NA	NA	NA	NA	NA	NA	NA	NA	NA	NA	NA	NA	NA	NA	NA	NA	NA	NA	NA	NA	NA	NA
Q92896	GLG1	Golgi apparatus protein 1	0.95812	0.6242	0.68551	0	TRUE	FALSE	FALSE	FALSE	1.29682	0.917783	0.203331	3.00889	0.960257	0.0134196	4.14503	0.995642	0.00792508	1.71207	0.979682	0.136409	2.84821	1	0.0551394	1.13614	0.899876	0.450743	FALSE	FALSE	FALSE	FALSE	FALSE	FALSE
Q9H4G4	GLIPR2	Golgi-associated plant pathogenesis-related protein 1	0.51163	0.66549	0.46139	0.99192	FALSE	FALSE	FALSE	TRUE	0.201104	0.968887	0.737598	0.174969	0.993091	0.794181	-2.03342	0.997043	0.0255563	-0.0261348	0.994487	0.968887	-2.23452	1	0.015436	-2.20839	0.478894	0.0226501	FALSE	FALSE	FALSE	FALSE	FALSE	FALSE
Q04760	GLO1	Lactoylglutathione lyase	0.77827	0.61603	0.90148	0.68551	TRUE	FALSE	TRUE	FALSE	0.0709464	0.972282	0.854853	0.66002	0.985364	0.139847	0.648058	0.998549	0.246136	0.589074	0.983376	0.18495	0.577112	1	0.299829	-0.011962	0.944837	0.983587	FALSE	FALSE	FALSE	FALSE	FALSE	FALSE
Q9HC38	GLOD4	Glyoxalase domain-containing protein 4	0.95543	0.64183	0.83811	0.68551	TRUE	FALSE	TRUE	FALSE	-0.65693	0.919737	0.210022	-0.838376	0.985978	0.155127	-2.0445	0.996019	0.010346	-0.181446	0.993412	0.751846	-1.38757	1	0.0679557	-1.20613	0.759278	0.128955	FALSE	FALSE	FALSE	FALSE	FALSE	FALSE
P35754	GLRX	Glutaredoxin-1	0.79402	0.54538	0.79422	0.98795	TRUE	FALSE	TRUE	TRUE	-0.101345	0.971756	0.834708	-0.396179	0.991202	0.468662	-0.956476	0.998383	0.174654	-0.294834	0.992224	0.588466	-0.855131	1	0.22256	-0.560297	0.898977	0.44531	FALSE	FALSE	FALSE	FALSE	FALSE	FALSE
P00367	GLUD1	Glutamate dehydrogenase 1, mitochondrial	0.92687	0.8412	0.68902	0.92233	TRUE	TRUE	FALSE	TRUE	-0.431156	0.907761	0.174113	-0.113295	0.992868	0.743344	-0.151925	0.998997	0.728553	0.317861	0.989308	0.363179	0.279231	1	0.525222	-0.0386296	0.942489	0.933589	FALSE	FALSE	FALSE	FALSE	FALSE	FALSE
P15104	GLUL	Glutamine synthetase	0.87116	0.7231	0.88992	0.98888	TRUE	FALSE	TRUE	TRUE	-0.747407	0.889436	0.136209	-0.403793	0.991136	0.460844	-0.24484	0.998994	0.72214	0.343614	0.991656	0.529434	0.502567	1	0.467961	0.158953	0.936758	0.827508	FALSE	FALSE	FALSE	FALSE	FALSE	FALSE
P17900	GM2A	Ganglioside GM2 activator	0.61705	0.4924	0.72599	0.98015	FALSE	FALSE	FALSE	TRUE	0.107068	0.972478	0.862554	-1.44705	0.977098	0.0477839	-0.941349	0.998622	0.289251	-1.55411	0.948735	0.0349212	-1.04842	1	0.239618	0.505696	0.917754	0.587067	FALSE	FALSE	FALSE	FALSE	FALSE	FALSE
P60983	GMFB	Glia maturation factor beta	0.97502	0.75921	0.96929	0.68551	TRUE	TRUE	TRUE	FALSE	-0.296993	0.958866	0.512467	-0.877659	0.982762	0.0942175	-0.567054	0.998739	0.378861	-0.580666	0.986623	0.257777	-0.270061	1	0.672551	0.310605	0.923569	0.646882	FALSE	FALSE	FALSE	FALSE	FALSE	FALSE
P29992	GNA11	Guanine nucleotide-binding protein subunit alpha-11	0.82472	0.87058	0.80115	0.92683	TRUE	TRUE	TRUE	TRUE	-0.491412	0.948039	0.375973	-0.30114	0.992264	0.624828	0.358372	0.998951	0.645333	0.190272	0.993442	0.75686	0.849784	1	0.281565	0.659512	0.895861	0.427279	FALSE	FALSE	FALSE	FALSE	FALSE	FALSE
P63096	GNAI1	Guanine nucleotide-binding protein G(i) subunit alpha-1	0.88261	0.78791	0.91608	0.91887	TRUE	TRUE	TRUE	TRUE	0.218299	0.968561	0.727765	0.692781	0.989752	0.328813	1.71502	0.9978	0.0650379	0.474482	0.991341	0.500589	1.49672	1	0.10356	1.02224	0.860115	0.284159	FALSE	FALSE	FALSE	FALSE	FALSE	FALSE
P04899	GNAI2	Guanine nucleotide-binding protein G(i) subunit alpha-2	0.80208	0.749	0.98774	0.68551	TRUE	FALSE	TRUE	FALSE	0.195689	0.960527	0.541044	0.0584515	0.993394	0.869653	1.49306	0.994159	0.00344649	-0.137238	0.993086	0.700511	1.29737	1	0.0090731	1.43461	0.256101	0.0069218	FALSE	FALSE	FALSE	FALSE	FALSE	FALSE
P08754	GNAI3	Guanine nucleotide-binding protein G(i) subunit alpha-3	0.95868	0.70976	0.68551	0	TRUE	FALSE	FALSE	FALSE	0.949194	0.936941	0.290335	2.51963	0.965577	0.0185579	3.63307	0.995754	0.00855171	1.57043	0.978386	0.124266	2.68388	1	0.0428605	1.11345	0.891782	0.405451	FALSE	FALSE	FALSE	FALSE	FALSE	FALSE
P09471	GNAO1	Guanine nucleotide-binding protein G(o) subunit alpha	0.89631	0.90987	0.89746	0.97102	TRUE	TRUE	TRUE	TRUE	0.700092	0.79846	0.0592268	0.969058	0.968423	0.0225999	1.82883	0.992149	0.00155627	0.268966	0.99131	0.49794	1.12874	1	0.0338938	0.859769	0.742946	0.116594	FALSE	FALSE	FALSE	FALSE	FALSE	FALSE
P50148	GNAQ	Guanine nucleotide-binding protein G(q) subunit alpha	0.87752	0.89958	0.77958	0.68551	TRUE	TRUE	TRUE	FALSE	-7.5e-05	0.975546	0.999874	0.377253	0.991307	0.48177	0.773186	0.998574	0.25961	0.377328	0.991118	0.481684	0.773261	1	0.259566	0.395934	0.91712	0.581103	FALSE	FALSE	FALSE	FALSE	FALSE	FALSE
Q5JWF2	GNAS	Guanine nucleotide-binding protein G(s) subunit alpha isoforms XLas	0.98372	0.84972	0.97882	0.85165	TRUE	TRUE	TRUE	TRUE	-0.760905	0.837801	0.0804471	0.138318	0.992973	0.76682	-0.105733	0.999059	0.857665	0.899223	0.966904	0.0659084	0.655171	1	0.274325	-0.244051	0.927778	0.696809	FALSE	FALSE	FALSE	FALSE	FALSE	FALSE
P19086	GNAZ	Guanine nucleotide-binding protein G(z) subunit alpha	0.94737	0.72056	0.68551	0	TRUE	FALSE	FALSE	FALSE	1.56016	0.899773	0.155613	3.44733	0.95223	0.00892668	4.62513	0.995218	0.00605711	1.88717	0.978608	0.126218	3.06497	1	0.0542354	1.1778	0.902217	0.465436	FALSE	FALSE	FALSE	FALSE	FALSE	FALSE
P62873	GNB1	Guanine nucleotide-binding protein G(I)/G(S)/G(T) subunit beta-1	0.79691	0.88714	0.93129	0.99272	TRUE	TRUE	TRUE	TRUE	0.606026	0.795173	0.0578714	0.964541	0.954339	0.00985872	1.42511	0.994133	0.00340444	0.358515	0.987834	0.298077	0.81908	1	0.068736	0.460564	0.871076	0.318474	FALSE	FALSE	FALSE	FALSE	FALSE	FALSE
P62879	GNB2	Guanine nucleotide-binding protein G(I)/G(S)/G(T) subunit beta-2	0.79594	0.80378	0.99043	0.92812	TRUE	TRUE	TRUE	TRUE	-0.00199936	0.97546	0.995542	-0.148506	0.992716	0.711023	-0.136286	0.999027	0.787902	-0.146507	0.99318	0.714728	-0.134286	1	0.790935	0.0122206	0.944758	0.981836	FALSE	FALSE	FALSE	FALSE	FALSE	FALSE
O14775	GNB5	Guanine nucleotide-binding protein subunit beta-5	0.83206	0.88611	0.68551	0	TRUE	TRUE	FALSE	FALSE	NA	NA	NA	NA	NA	NA	NA	NA	NA	NA	NA	NA	NA	NA	NA	NA	NA	NA	NA	NA	NA	NA	NA	NA
Q9UBI6	GNG12	Guanine nucleotide-binding protein G(I)/G(S)/G(O) subunit gamma-12	0.86942	0.50683	0.68551	0	TRUE	FALSE	FALSE	FALSE	NA	NA	NA	NA	NA	NA	NA	NA	NA	NA	NA	NA	NA	NA	NA	NA	NA	NA	NA	NA	NA	NA	NA	NA
P59768	GNG2	Guanine nucleotide-binding protein G(I)/G(S)/G(O) subunit gamma-2	0.9473	0.50016	0.83291	0	TRUE	FALSE	TRUE	FALSE	1.35443	0.909514	0.178684	1.73286	0.984752	0.126667	3.55016	0.996705	0.0182895	0.378429	0.993282	0.730662	2.19573	1	0.12605	1.8173	0.835918	0.226695	FALSE	FALSE	FALSE	FALSE	FALSE	FALSE
P63215	GNG3	Guanine nucleotide-binding protein G(I)/G(S)/G(O) subunit gamma-3	0.88361	0.28736	0.68552	0.68552	TRUE	FALSE	FALSE	FALSE	0.461651	0.956452	0.475302	-0.365999	0.992187	0.61144	-0.425663	0.998948	0.640245	-0.82765	0.986615	0.257534	-0.887314	1	0.334817	-0.0596638	0.943311	0.950604	FALSE	FALSE	FALSE	FALSE	FALSE	FALSE
O60262	GNG7	Guanine nucleotide-binding protein G(I)/G(S)/G(O) subunit gamma-7	0.84966	0.74502	0.68551	0	TRUE	FALSE	FALSE	FALSE	NA	NA	NA	NA	NA	NA	NA	NA	NA	NA	NA	NA	NA	NA	NA	NA	NA	NA	NA	NA	NA	NA	NA	NA
P46926	GNPDA1	Glucosamine-6-phosphate isomerase 1	0.93758	0.7855	0.92408	0.68551	TRUE	TRUE	TRUE	FALSE	0.312149	0.955925	0.467797	-0.0967475	0.993277	0.839396	0.733421	0.998525	0.233612	-0.408897	0.9899	0.396228	0.421272	1	0.488094	0.830168	0.823955	0.204903	FALSE	FALSE	FALSE	FALSE	FALSE	FALSE
P17174	GOT1	Aspartate aminotransferase, cytoplasmic	0.88648	0.82662	0.59036	0.94959	TRUE	TRUE	FALSE	TRUE	0.652045	0.845897	0.0863821	0.855471	0.977003	0.04732	0.935904	0.997955	0.0821468	0.203426	0.992483	0.618988	0.283859	1	0.583574	0.0804338	0.939903	0.883114	FALSE	FALSE	FALSE	FALSE	FALSE	FALSE
P00505	GOT2	Aspartate aminotransferase, mitochondrial	0.88478	0.84991	0.93484	0.9198	TRUE	TRUE	TRUE	TRUE	-0.747524	0.874303	0.114353	-0.690758	0.987026	0.18711	-0.742376	0.998573	0.259178	0.056766	0.99424	0.911535	0.00514721	1	0.993644	-0.0516188	0.9428	0.939969	FALSE	FALSE	FALSE	FALSE	FALSE	FALSE
P35052	GPC1	Glypican-1	0.92271	0.62	0	0	TRUE	FALSE	FALSE	FALSE	0.893519	0.940503	0.313819	3.24599	0.925145	0.00340731	3.24599	0.996545	0.0158293	2.35247	0.935526	0.0251845	2.35247	1	0.0695605	0	0.945566	1	FALSE	FALSE	FALSE	FALSE	FALSE	FALSE
Q8N335	GPD1L	Glycerol-3-phosphate dehydrogenase 1-like protein	0.93492	0.86167	0.68551	0	TRUE	TRUE	FALSE	FALSE	-0.342743	0.967437	0.695488	2.06819	0.976638	0.045592	2.98584	0.997009	0.024654	2.41094	0.929326	0.0221145	3.32858	1	0.0136417	0.917644	0.905413	0.486811	FALSE	FALSE	FALSE	FALSE	FALSE	FALSE
Q9NQX3	GPHN	Gephyrin	0.77006	0.8041	0.824	0.98766	TRUE	TRUE	TRUE	TRUE	0.152651	0.969355	0.752097	0.674321	0.987895	0.221126	-0.022781	0.999107	0.973372	0.52167	0.988833	0.339835	-0.175432	1	0.797323	-0.697102	0.877457	0.341716	FALSE	FALSE	FALSE	FALSE	FALSE	FALSE
P06744	GPI	Glucose-6-phosphate isomerase	0.88781	0.78934	0.66185	0.58567	TRUE	TRUE	FALSE	FALSE	0.41288	0.953075	0.430536	0.798175	0.986819	0.180123	0.362326	0.998937	0.622876	0.385295	0.991441	0.509456	-0.0505539	1	0.945112	-0.435849	0.91672	0.577393	FALSE	FALSE	FALSE	FALSE	FALSE	FALSE
P51674	GPM6A	Neuronal membrane glycoprotein M6-a	0.77438	0.87106	0.93183	0.92849	TRUE	TRUE	TRUE	TRUE	-1.33705	0.877926	0.119017	-1.4611	0.984769	0.127025	-0.885023	0.998813	0.453626	-0.124057	0.994158	0.893485	0.452023	1	0.700246	0.57608	0.923306	0.643966	FALSE	FALSE	FALSE	FALSE	FALSE	FALSE
Q13491	GPM6B	Neuronal membrane glycoprotein M6-b	0.96775	0.75379	0.9222	0	TRUE	TRUE	TRUE	FALSE	1.25829	0.919601	0.209547	2.2661	0.977608	0.0504004	6.61889	0.977506	0.00012872	1.0078	0.989315	0.363584	5.3606	1	0.000991891	4.3528	0.273966	0.00762839	FALSE	FALSE	FALSE	FALSE	FALSE	FALSE
Q5T848	GPR158	Probable G-protein coupled receptor 158	0.93185	0.90578	0.75329	0	TRUE	TRUE	TRUE	FALSE	0.786306	0.949042	0.385857	1.37656	0.986844	0.180932	2.94605	0.997192	0.0300221	0.590254	0.991944	0.558142	2.15974	1	0.101365	1.56949	0.847804	0.252299	FALSE	FALSE	FALSE	FALSE	FALSE	FALSE
O60883	GPR37L1	G-protein coupled receptor 37-like 1	0.86554	0.46238	0.68551	0	TRUE	FALSE	FALSE	FALSE	NA	NA	NA	NA	NA	NA	NA	NA	NA	NA	NA	NA	NA	NA	NA	NA	NA	NA	NA	NA	NA	NA	NA	NA
Q7Z2K8	GPRIN1	G protein-regulated inducer of neurite outgrowth 1	0.86796	0.79615	0	0	TRUE	TRUE	FALSE	FALSE	NA	NA	NA	NA	NA	NA	NA	NA	NA	NA	NA	NA	NA	NA	NA	NA	NA	NA	NA	NA	NA	NA	NA	NA
P07203	GPX1	Glutathione peroxidase 1	0.95696	0.72959	0.90422	0	TRUE	FALSE	TRUE	FALSE	1.0523	0.918118	0.204451	1.68361	0.981122	0.0757303	4.19406	0.992202	0.00158424	0.63131	0.991205	0.488952	3.14177	1	0.0123139	2.51046	0.618176	0.0506026	FALSE	FALSE	FALSE	FALSE	FALSE	FALSE
P36969	GPX4	Phospholipid hydroperoxide glutathione peroxidase	0.95728	0.81127	0.83965	0	TRUE	TRUE	TRUE	FALSE	0.820006	0.944733	0.346296	1.36786	0.986371	0.166158	2.98791	0.996925	0.0226232	0.54785	0.992061	0.5705	2.1679	1	0.0872743	1.62005	0.831858	0.218899	FALSE	FALSE	FALSE	FALSE	FALSE	FALSE
P62993	GRB2	Growth factor receptor-bound protein 2	0.93318	0.53295	0.68551	0.68551	TRUE	FALSE	FALSE	FALSE	0.658634	0.913309	0.189319	0.637443	0.988557	0.253028	-0.887478	0.998474	0.210077	-0.0211915	0.994488	0.969123	-1.54611	1	0.0360726	-1.52492	0.614788	0.0494791	FALSE	FALSE	FALSE	FALSE	FALSE	FALSE
Q9UBQ7	GRHPR	Glyoxylate reductase/hydroxypyruvate reductase	0.97885	0.7709	0.8385	0.68551	TRUE	TRUE	TRUE	FALSE	-0.165772	0.965407	0.64301	-0.815624	0.977998	0.0525471	-0.704297	0.99838	0.173699	-0.649852	0.97732	0.115586	-0.538525	1	0.293103	0.111328	0.937214	0.835217	FALSE	FALSE	FALSE	FALSE	FALSE	FALSE
Q14416	GRM2	Metabotropic glutamate receptor 2	0.97637	0.63948	0.68551	0	TRUE	FALSE	FALSE	FALSE	0.725597	0.93337	0.269684	2.36791	0.928451	0.00374683	3.20768	0.993132	0.00221768	1.64231	0.946873	0.0331816	2.48208	1	0.0129889	0.839765	0.888909	0.391163	FALSE	FALSE	FALSE	FALSE	FALSE	FALSE
P28799	GRN	Progranulin	0.85402	0.26269	0.68551	0.68551	TRUE	FALSE	FALSE	FALSE	0.593117	0.934745	0.277325	0.372498	0.991716	0.537107	-0.251891	0.999003	0.74048	-0.220619	0.993173	0.713753	-0.845008	1	0.273898	-0.624388	0.898421	0.442	FALSE	FALSE	FALSE	FALSE	FALSE	FALSE
Q96QA5	GSDMA	Gasdermin-A	0.62984	0.70061	0.56955	0.97069	FALSE	FALSE	FALSE	TRUE	-0.859814	0.839463	0.0816091	-0.909822	0.983034	0.0978905	-2.26749	0.993783	0.00290377	-0.0500085	0.994299	0.92464	-1.40768	1	0.0466916	-1.35767	0.659048	0.0679649	FALSE	FALSE	FALSE	FALSE	FALSE	FALSE
P49841	GSK3B	Glycogen synthase kinase-3 beta	0.87408	0.51079	0.68551	0	TRUE	FALSE	FALSE	FALSE	NA	NA	NA	NA	NA	NA	NA	NA	NA	NA	NA	NA	NA	NA	NA	NA	NA	NA	NA	NA	NA	NA	NA	NA
P06396	GSN	Gelsolin	0.83029	0.79134	0.89489	0.98464	TRUE	TRUE	TRUE	TRUE	-0.367878	0.944523	0.344554	0.0561072	0.993493	0.896133	0.0476859	0.99909	0.930093	0.423985	0.988622	0.330253	0.415564	1	0.448204	-0.00842133	0.94505	0.988345	FALSE	FALSE	FALSE	FALSE	FALSE	FALSE
P00390	GSR	Glutathione reductase, mitochondrial	0.98007	0.82234	0.91511	0.68551	TRUE	TRUE	TRUE	FALSE	0.122727	0.970805	0.800253	0.487449	0.990295	0.373653	1.1598	0.998095	0.103224	0.364722	0.991374	0.503551	1.03707	1	0.142225	0.672353	0.882155	0.360678	FALSE	FALSE	FALSE	FALSE	FALSE	FALSE
P48637	GSS	Glutathione synthetase	0.90024	0.7993	0.76298	0.95234	TRUE	TRUE	TRUE	TRUE	-0.551541	0.937125	0.291471	-0.518876	0.990283	0.37257	-1.1383	0.998227	0.130091	0.0326643	0.994428	0.954733	-0.586758	1	0.424335	-0.619423	0.895717	0.42648	FALSE	FALSE	FALSE	FALSE	FALSE	FALSE
P09488	GSTM1	Glutathione S-transferase Mu 1	0.86982	0.79461	0.68551	0	TRUE	TRUE	FALSE	FALSE	-0.379143	0.968017	0.711827	1.55076	0.987009	0.186544	2.3359	0.998179	0.119322	1.9299	0.975758	0.104602	2.71505	1	0.0734234	0.785149	0.920163	0.61068	FALSE	FALSE	FALSE	FALSE	FALSE	FALSE
P28161	GSTM2	Glutathione S-transferase Mu 2	0.71128	0.82284	0.92328	0.68551	FALSE	TRUE	TRUE	FALSE	0.255211	0.958231	0.502216	0.972832	0.972559	0.0312625	0.106042	0.999052	0.842815	0.717622	0.97536	0.102081	-0.149169	1	0.780406	-0.866791	0.770186	0.138348	FALSE	FALSE	FALSE	FALSE	FALSE	FALSE
P21266	GSTM3	Glutathione S-transferase Mu 3	0.99092	0.90386	0.82037	0.68551	TRUE	TRUE	TRUE	FALSE	-0.168048	0.96637	0.667052	0.541744	0.987945	0.223305	0.482733	0.998746	0.386021	0.709792	0.977337	0.115715	0.650781	1	0.246524	-0.0590106	0.941795	0.919583	FALSE	FALSE	FALSE	FALSE	FALSE	FALSE
P78417	GSTO1	Glutathione S-transferase omega-1	0.97896	0.5885	0.68551	0	TRUE	FALSE	FALSE	FALSE	0.683797	0.9577	0.493916	3.34303	0.945872	0.00679836	4.68925	0.994043	0.00326401	2.65924	0.936557	0.0257668	4.00546	1	0.00965454	1.34622	0.884657	0.371498	FALSE	FALSE	FALSE	FALSE	FALSE	FALSE
P09211	GSTP1	Glutathione S-transferase P	0.83592	0.7742	0.78722	0.95242	TRUE	TRUE	TRUE	TRUE	0.130223	0.968884	0.737507	-0.064336	0.993441	0.882114	-0.344645	0.998876	0.53213	-0.194559	0.992761	0.654644	-0.474869	1	0.391642	-0.280309	0.922125	0.631118	FALSE	FALSE	FALSE	FALSE	FALSE	FALSE
P0CG30	GSTT2B	Glutathione S-transferase theta-2B	0.79507	0	0	0	TRUE	FALSE	FALSE	FALSE	NA	NA	NA	NA	NA	NA	NA	NA	NA	NA	NA	NA	NA	NA	NA	NA	NA	NA	NA	NA	NA	NA	NA	NA
O43708	GSTZ1	Maleylacetoacetate isomerase	0.87808	0.8112	0.68551	0	TRUE	TRUE	FALSE	FALSE	-1.23159	0.830508	0.0756546	0.779209	0.989351	0.300287	1.57805	0.998104	0.104844	2.0108	0.897211	0.0130582	2.80964	1	0.00700231	0.79884	0.89559	0.425772	FALSE	FALSE	FALSE	FALSE	FALSE	FALSE
Q16774	GUK1	Guanylate kinase	0.98043	0.60407	0	0	TRUE	FALSE	FALSE	FALSE	2.27144	0.0586458	0.000636206	3.65113	0.283463	1.28e-05	3.65113	0.980832	0.000182435	1.3797	0.951717	0.0380591	1.3797	1	0.0937692	0	0.945566	1	FALSE	FALSE	FALSE	FALSE	FALSE	FALSE
P46976	GYG1	Glycogenin-1	0.91692	0.7588	0.68551	0	TRUE	TRUE	FALSE	FALSE	-0.840088	0.947569	0.371495	1.60376	0.985145	0.134924	2.48511	0.997861	0.0711452	2.44385	0.940493	0.0282223	3.3252	1	0.019403	0.881345	0.911155	0.529594	FALSE	FALSE	FALSE	FALSE	FALSE	FALSE
P07305	H1-0	Histone H1.0	0.8629	0.31366	0.68551	0	TRUE	FALSE	FALSE	FALSE	NA	NA	NA	NA	NA	NA	NA	NA	NA	NA	NA	NA	NA	NA	NA	NA	NA	NA	NA	NA	NA	NA	NA	NA
Q92522	H1-10	Histone H1.10	0.76151	0.40478	0.68551	0	TRUE	FALSE	FALSE	FALSE	NA	NA	NA	NA	NA	NA	NA	NA	NA	NA	NA	NA	NA	NA	NA	NA	NA	NA	NA	NA	NA	NA	NA	NA
P10412	H1-4	Histone H1.4	0.88371	0.49633	0.89083	0.94997	TRUE	FALSE	TRUE	TRUE	0.145561	0.970314	0.783391	-0.664616	0.988852	0.269334	0.202773	0.999026	0.786548	-0.810177	0.983177	0.181641	0.057212	1	0.939039	0.867389	0.859409	0.282158	FALSE	FALSE	FALSE	FALSE	FALSE	FALSE
P0C0S8;P20671;Q96KK5;Q99878;Q9BTM1	H2AC12	Histone H2A type 1;Histone H2A type 1-D;Histone H2A type 1-H;Histone H2A type 1-J;Histone H2A.J	0.42117	0.76302	0.62841	0.85252	FALSE	TRUE	FALSE	TRUE	NA	NA	NA	NA	NA	NA	NA	NA	NA	NA	NA	NA	NA	NA	NA	NA	NA	NA	NA	NA	NA	NA	NA	NA
Q8IUE6	H2AC21	Histone H2A type 2-B	0.78792	0.71184	0.30647	0.68551	TRUE	FALSE	FALSE	FALSE	-0.257404	0.969125	0.7449	-0.622343	0.991325	0.484042	0.235284	0.999048	0.83329	-0.364939	0.992946	0.680172	0.492687	1	0.660061	0.857626	0.903288	0.472422	FALSE	FALSE	FALSE	FALSE	FALSE	FALSE
P04908;Q7L7L0;Q93077	H2AC8;H2AC25;H2AC6	Histone H2A type 1-B/E;Histone H2A type 3;Histone H2A type 1-C	0.73892	0.71242	0.59495	0.99403	FALSE	FALSE	FALSE	TRUE	0.0608783	0.973097	0.88764	-0.612298	0.987719	0.213575	-0.712837	0.998558	0.250764	-0.673176	0.982654	0.173364	-0.773716	1	0.214021	-0.100539	0.93954	0.876388	FALSE	FALSE	FALSE	FALSE	FALSE	FALSE
P0C0S5;Q71UI9	H2AZ1;H2AZ2	Histone H2A.Z;Histone H2A.V	0.7998	0.42685	0.83052	0	TRUE	FALSE	TRUE	FALSE	NA	NA	NA	NA	NA	NA	NA	NA	NA	NA	NA	NA	NA	NA	NA	NA	NA	NA	NA	NA	NA	NA	NA	NA
P06899;P23527;P33778;Q16778	H2BC11	Histone H2B type 1-J;Histone H2B type 1-O;Histone H2B type 1-B;Histone H2B type 2-E	0.91943	0.49957	0.833	0.95371	TRUE	FALSE	TRUE	TRUE	NA	NA	NA	NA	NA	NA	NA	NA	NA	NA	NA	NA	NA	NA	NA	NA	NA	NA	NA	NA	NA	NA	NA	NA
O60814;P57053;P58876;P62807;Q5QNW6;Q93079;Q99877;Q99879;Q99880	H2BC12;H2BC12L;H2BC5;H2BC10;H2BC18;H2BC9;H2BC15;H2BC14;H2BC13	Histone H2B type 1-K;Histone H2B type F-S;Histone H2B type 1-D;Histone H2B type 1-C/E/F/G/I;Histone H2B type 2-F;Histone H2B type 1-H;Histone H2B type 1-N;Histone H2B type 1-M;Histone H2B type 1-L	0.74509	0.78409	0.76452	0.97154	FALSE	TRUE	TRUE	TRUE	-0.5689	0.908803	0.176805	-0.788949	0.983057	0.0982174	-0.793349	0.998406	0.182605	-0.220049	0.992592	0.632649	-0.224449	1	0.699584	-0.00439989	0.945315	0.994298	FALSE	FALSE	FALSE	FALSE	FALSE	FALSE
Q14520	HABP2	Hyaluronan-binding protein 2	0.86892	0.3881	0.68551	0	TRUE	FALSE	FALSE	FALSE	NA	NA	NA	NA	NA	NA	NA	NA	NA	NA	NA	NA	NA	NA	NA	NA	NA	NA	NA	NA	NA	NA	NA	NA
Q16836	HADH	Hydroxyacyl-coenzyme A dehydrogenase, mitochondrial	0.97185	0.59424	0.83399	0	TRUE	FALSE	TRUE	FALSE	0.430926	0.961126	0.552023	2.4481	0.944414	0.00641876	4.76281	0.97973	0.000161335	2.01718	0.925571	0.0205557	4.33188	1	0.000416573	2.3147	0.594634	0.0435104	FALSE	FALSE	FALSE	FALSE	FALSE	FALSE
P40939	HADHA	Trifunctional enzyme subunit alpha, mitochondrial	0.93272	0.70184	0	0	TRUE	FALSE	FALSE	FALSE	0.308601	0.966076	0.659544	2.88921	0.886661	0.00144625	2.88921	0.995699	0.00823726	2.58061	0.743849	0.00353293	2.58061	1	0.016268	0	0.945566	1	FALSE	FALSE	FALSE	FALSE	FALSE	FALSE
Q16775	HAGH	Hydroxyacylglutathione hydrolase, mitochondrial	0.91366	0.80107	0.95997	0.93263	TRUE	TRUE	TRUE	TRUE	-0.880053	0.929309	0.249111	-1.35423	0.984323	0.118467	-0.851238	0.998787	0.425983	-0.474174	0.992085	0.573133	0.0288157	1	0.978308	0.50299	0.924327	0.655429	FALSE	FALSE	FALSE	FALSE	FALSE	FALSE
P42357	HAL	Histidine ammonia-lyase	0.52315	0.68495	0.34961	0.98579	FALSE	FALSE	FALSE	TRUE	-0.199545	0.961268	0.554677	-0.692817	0.981335	0.0778146	-1.27715	0.996389	0.0138471	-0.493272	0.984193	0.199718	-1.0776	1	0.0336235	-0.584331	0.849009	0.255154	FALSE	FALSE	FALSE	FALSE	FALSE	FALSE
P10915	HAPLN1	Hyaluronan and proteoglycan link protein 1	0.97801	0.921	0.98427	0.96955	TRUE	TRUE	TRUE	TRUE	-0.682695	0.906061	0.16987	-1.09293	0.978489	0.0554388	-0.138928	0.999051	0.839325	-0.410238	0.99074	0.45221	0.543767	1	0.431205	0.954004	0.820642	0.199456	FALSE	FALSE	FALSE	FALSE	FALSE	FALSE
Q9GZV7	HAPLN2	Hyaluronan and proteoglycan link protein 2	0.70415	0.88986	0.8445	0.99354	FALSE	TRUE	TRUE	TRUE	-0.480799	0.931351	0.259099	-0.289945	0.99172	0.537581	0.364724	0.998882	0.539812	0.190854	0.992973	0.683993	0.845524	1	0.164479	0.654669	0.866745	0.30414	FALSE	FALSE	FALSE	FALSE	FALSE	FALSE
Q86UW8	HAPLN4	Hyaluronan and proteoglycan link protein 4	0.97848	0.74016	0.91575	0	TRUE	FALSE	TRUE	FALSE	1.35953	0.83095	0.0759317	1.14224	0.986634	0.174148	3.7406	0.992513	0.00176258	-0.217289	0.993638	0.790908	2.38107	1	0.0314704	2.59836	0.513599	0.0274237	FALSE	FALSE	FALSE	FALSE	FALSE	FALSE
P12081	HARS1	Histidine--tRNA ligase, cytoplasmic	0.94888	0.6676	0.83863	0.97862	TRUE	FALSE	TRUE	TRUE	0.0305476	0.974389	0.944118	0.240005	0.992257	0.623469	-0.418871	0.998851	0.499474	0.209458	0.99286	0.668069	-0.449419	1	0.469145	-0.658876	0.871585	0.320231	FALSE	FALSE	FALSE	FALSE	FALSE	FALSE
P69905	HBA2	Hemoglobin subunit alpha	0.57868	0.71927	0.78395	0.29262	FALSE	FALSE	TRUE	FALSE	0.554673	0.871501	0.110954	-0.270591	0.991245	0.474036	-0.709952	0.998292	0.146609	-0.825264	0.952201	0.0386152	-1.26463	1	0.0145345	-0.439361	0.88821	0.387815	FALSE	FALSE	FALSE	FALSE	FALSE	FALSE
P68871	HBB	Hemoglobin subunit beta	0.77114	0.8111	0.81547	0.94298	TRUE	TRUE	TRUE	TRUE	-0.167082	0.969539	0.757955	-0.0871144	0.993454	0.885609	-0.459029	0.99889	0.550865	0.0799675	0.994165	0.894932	-0.291947	1	0.703583	-0.371915	0.923666	0.647975	FALSE	FALSE	FALSE	FALSE	FALSE	FALSE
P02042	HBD	Hemoglobin subunit delta	0.87454	0.86376	0.49784	0.86865	TRUE	TRUE	FALSE	TRUE	-0.339592	0.965039	0.634201	-0.706979	0.990357	0.379302	-0.209671	0.999049	0.835016	-0.367386	0.992689	0.645147	0.129921	1	0.897276	0.497307	0.923147	0.642213	FALSE	FALSE	FALSE	FALSE	FALSE	FALSE
P69891;P69892	HBG1;HBG2	Hemoglobin subunit gamma-1;Hemoglobin subunit gamma-2	0.82535	0.34625	0.95408	0.68557	TRUE	FALSE	TRUE	FALSE	0.333524	0.969778	0.765623	-0.594783	0.992322	0.635086	-0.939859	0.998892	0.553974	-0.928307	0.990855	0.460895	-1.27338	1	0.424536	-0.345075	0.937318	0.836983	FALSE	FALSE	FALSE	FALSE	FALSE	FALSE
Q9H0R4	HDHD2	Haloacid dehalogenase-like hydrolase domain-containing protein 2	0.97588	0.66499	0.80111	0.68551	TRUE	FALSE	TRUE	FALSE	0.22985	0.965623	0.648259	-0.45204	0.990819	0.425101	-0.184954	0.99903	0.794804	-0.681891	0.985754	0.234087	-0.414804	1	0.561194	0.267086	0.929827	0.723486	FALSE	FALSE	FALSE	FALSE	FALSE	FALSE
Q9NRV9	HEBP1	Heme-binding protein 1	0.8736	0.26147	0.68551	0	TRUE	FALSE	FALSE	FALSE	NA	NA	NA	NA	NA	NA	NA	NA	NA	NA	NA	NA	NA	NA	NA	NA	NA	NA	NA	NA	NA	NA	NA	NA
Q14CZ8	HEPACAM	Hepatocyte cell adhesion molecule	0.94297	0.62955	0.80797	0	TRUE	FALSE	TRUE	FALSE	0.568687	0.956161	0.47113	2.05353	0.971504	0.0286389	4.17743	0.991401	0.0012296	1.48484	0.975451	0.102649	3.60874	1	0.00392344	2.1239	0.683423	0.083326	FALSE	FALSE	FALSE	FALSE	FALSE	FALSE
P07686	HEXB	Beta-hexosaminidase subunit beta	0.94988	0.51943	0.68551	0.95197	TRUE	FALSE	FALSE	TRUE	0.0401834	0.974156	0.933509	-0.740448	0.986818	0.180074	-0.546668	0.998787	0.426315	-0.780631	0.981615	0.158704	-0.586852	1	0.393746	0.19378	0.93435	0.788717	FALSE	FALSE	FALSE	FALSE	FALSE	FALSE
P49773	HINT1	Adenosine 5'-monophosphoramidase HINT1	0.68773	0.80411	0.68551	0.98855	FALSE	TRUE	FALSE	TRUE	-0.043754	0.974113	0.931587	-0.0725018	0.993503	0.898766	1.26221	0.998029	0.0925563	-0.0287477	0.994449	0.959761	1.30597	1	0.0826066	1.33472	0.70424	0.0934755	FALSE	FALSE	FALSE	FALSE	FALSE	FALSE
P19367	HK1	Hexokinase-1	0.97207	0.87069	0.97861	0.86229	TRUE	TRUE	TRUE	TRUE	-0.216062	0.960255	0.536185	-0.388718	0.989682	0.323592	0.41486	0.998764	0.403089	-0.172656	0.992783	0.657551	0.630922	1	0.209195	0.803578	0.766668	0.135208	FALSE	FALSE	FALSE	FALSE	FALSE	FALSE
P01889	HLA-B	HLA class I histocompatibility antigen, B alpha chain	0.82406	0.70899	0	0	TRUE	FALSE	FALSE	FALSE	NA	NA	NA	NA	NA	NA	NA	NA	NA	NA	NA	NA	NA	NA	NA	NA	NA	NA	NA	NA	NA	NA	NA	NA
P09429	HMGB1	High mobility group protein B1	0.83406	0.76902	0.83974	0.68551	TRUE	TRUE	TRUE	FALSE	0.841484	0.791712	0.0564972	0.301924	0.991607	0.521487	1.68557	0.995945	0.00979327	-0.53956	0.986625	0.257821	0.844085	1	0.165541	1.38365	0.573704	0.0383718	FALSE	FALSE	FALSE	FALSE	FALSE	FALSE
P09651	HNRNPA1	Heterogeneous nuclear ribonucleoprotein A1	0.76138	0.72333	0.98961	0.96694	TRUE	FALSE	TRUE	TRUE	0.169025	0.968503	0.726028	0.496948	0.990158	0.361623	-0.484268	0.998835	0.480096	0.327923	0.991811	0.544537	-0.653293	1	0.343513	-0.981216	0.811216	0.185159	FALSE	FALSE	FALSE	FALSE	FALSE	FALSE
P22626	HNRNPA2B1	Heterogeneous nuclear ribonucleoproteins A2/B1	0.78503	0.71797	0.9872	0.98328	TRUE	FALSE	TRUE	TRUE	0.264488	0.955764	0.465544	0.200629	0.992232	0.619106	0.435656	0.998758	0.396595	-0.0638584	0.994066	0.873886	0.171169	1	0.736922	0.235027	0.92507	0.663987	FALSE	FALSE	FALSE	FALSE	FALSE	FALSE
P51991	HNRNPA3	Heterogeneous nuclear ribonucleoprotein A3	0.6557	0.70123	0.9158	0.68551	FALSE	FALSE	TRUE	FALSE	0.694213	0.831289	0.0761454	0.88955	0.97646	0.0447814	-0.195414	0.998989	0.71248	0.195336	0.992662	0.641618	-0.889627	1	0.10539	-1.08496	0.654458	0.0655811	FALSE	FALSE	FALSE	FALSE	FALSE	FALSE
P07910	HNRNPC	Heterogeneous nuclear ribonucleoproteins C1/C2	0.81986	0.86192	0.96946	0.92512	TRUE	TRUE	TRUE	TRUE	-0.552388	0.871733	0.111229	-0.16168	0.992491	0.666342	0.0333627	0.999095	0.943781	0.390708	0.987974	0.303414	0.585751	1	0.225271	0.195043	0.92788	0.698099	FALSE	FALSE	FALSE	FALSE	FALSE	FALSE
Q14103	HNRNPD	Heterogeneous nuclear ribonucleoprotein D0	0.9629	0.74201	0.91148	0	TRUE	FALSE	TRUE	FALSE	0.205869	0.970033	0.773982	0.927574	0.9886	0.255295	4.27644	0.986972	0.000441366	0.721705	0.989487	0.372707	4.07058	1	0.00069913	3.34887	0.211578	0.00536196	FALSE	FALSE	FALSE	FALSE	FALSE	FALSE
P52597	HNRNPF	Heterogeneous nuclear ribonucleoprotein F	0.90462	0.44467	0	0	TRUE	FALSE	FALSE	FALSE	NA	NA	NA	NA	NA	NA	NA	NA	NA	NA	NA	NA	NA	NA	NA	NA	NA	NA	NA	NA	NA	NA	NA	NA
P31943	HNRNPH1	Heterogeneous nuclear ribonucleoprotein H	0.9736	0.60086	0.68551	0.68551	TRUE	FALSE	FALSE	FALSE	-0.0770988	0.972277	0.854647	0.0647405	0.993472	0.890544	-0.738611	0.998505	0.224064	0.141839	0.99348	0.763264	-0.661512	1	0.274268	-0.803351	0.828613	0.212972	FALSE	FALSE	FALSE	FALSE	FALSE	FALSE
P61978	HNRNPK	Heterogeneous nuclear ribonucleoprotein K	0.76289	0.81851	0.59009	0.79895	TRUE	TRUE	FALSE	TRUE	0.22656	0.962548	0.579683	0.620738	0.986927	0.183732	0.645811	0.998592	0.270436	0.394178	0.989823	0.391621	0.419252	1	0.46998	0.0250737	0.944092	0.967264	FALSE	FALSE	FALSE	FALSE	FALSE	FALSE
P14866	HNRNPL	Heterogeneous nuclear ribonucleoprotein L	0.78358	0.89404	0	0	TRUE	TRUE	FALSE	FALSE	-0.529741	0.954951	0.454457	1.80373	0.972711	0.0316691	1.80373	0.997954	0.0821179	2.33347	0.846667	0.0074413	2.33347	1	0.0284195	0	0.945566	1	FALSE	FALSE	FALSE	FALSE	FALSE	FALSE
P52272	HNRNPM	Heterogeneous nuclear ribonucleoprotein M	0.97578	0.7147	0	0	TRUE	FALSE	FALSE	FALSE	0.532332	0.951354	0.410436	3.91791	0.367857	2.8e-05	3.91791	0.985632	0.000350679	3.38558	0.264494	0.000142381	3.38558	1	0.00132639	0	0.945566	1	FALSE	FALSE	FALSE	FALSE	FALSE	FALSE
O43390	HNRNPR	Heterogeneous nuclear ribonucleoprotein R	0.95001	0.52985	0	0	TRUE	FALSE	FALSE	FALSE	2.20875	0.656966	0.0265227	3.62334	0.909602	0.0023004	3.62334	0.996186	0.0117505	1.41459	0.983284	0.183408	1.41459	1	0.288498	0	0.945566	1	FALSE	FALSE	FALSE	FALSE	FALSE	FALSE
Q00839	HNRNPU	Heterogeneous nuclear ribonucleoprotein U	0.94338	0.52865	0	0	TRUE	FALSE	FALSE	FALSE	1.0068	0.887861	0.133614	2.97588	0.823663	0.000590015	2.97588	0.994515	0.00410647	1.96907	0.897936	0.0131884	1.96907	1	0.0433756	0	0.945566	1	FALSE	FALSE	FALSE	FALSE	FALSE	FALSE
P00738	HP	Haptoglobin	0.79624	0.76278	0.97525	0.3999	TRUE	TRUE	TRUE	FALSE	0.0433141	0.974305	0.940278	-0.0672455	0.993569	0.917148	-1.36971	0.998113	0.106464	-0.11056	0.994019	0.864233	-1.41302	1	0.0965891	-1.30246	0.777276	0.145026	FALSE	FALSE	FALSE	FALSE	FALSE	FALSE
Q5SSJ5	HP1BP3	Heterochromatin protein 1-binding protein 3	0.89034	0.80784	0.98215	0.97047	TRUE	TRUE	TRUE	TRUE	-0.547728	0.902403	0.161316	-0.554142	0.987452	0.202791	-0.653134	0.998526	0.233944	-0.00641451	0.994564	0.987963	-0.105407	1	0.844702	-0.0989921	0.938764	0.862289	FALSE	FALSE	FALSE	FALSE	FALSE	FALSE
P00492	HPRT1	Hypoxanthine-guanine phosphoribosyltransferase	0.90762	0.87653	0.98944	0.9497	TRUE	TRUE	TRUE	TRUE	-0.0482899	0.972483	0.862734	0.21088	0.991464	0.50202	1.29837	0.994284	0.00365897	0.25917	0.990137	0.410844	1.34666	1	0.00277782	1.08749	0.426033	0.0168092	FALSE	FALSE	FALSE	FALSE	FALSE	FALSE
P02790	HPX	Hemopexin	0.69046	0.7463	0.80081	0.91032	FALSE	FALSE	TRUE	TRUE	0.148715	0.967622	0.700635	-0.56332	0.987435	0.202135	-0.395169	0.998829	0.472367	-0.712034	0.976773	0.111521	-0.543884	1	0.32571	0.16815	0.933236	0.771765	FALSE	FALSE	FALSE	FALSE	FALSE	FALSE
Q99714	HSD17B10	3-hydroxyacyl-CoA dehydrogenase type-2	0.71241	0.76608	0.68551	0	FALSE	TRUE	FALSE	FALSE	0.555588	0.963988	0.610182	2.7218	0.97398	0.0353892	3.50751	0.997261	0.0324558	2.16621	0.972575	0.0870178	2.95192	1	0.0669145	0.785712	0.922079	0.630626	FALSE	FALSE	FALSE	FALSE	FALSE	FALSE
Q53GQ0	HSD17B12	Very-long-chain 3-oxoacyl-CoA reductase	0.87388	0.85809	0	0	TRUE	TRUE	FALSE	FALSE	-0.918182	0.870628	0.109931	1.103	0.982228	0.0875378	1.103	0.99837	0.170351	2.02118	0.758786	0.00386564	2.02118	1	0.0174103	0	0.945566	1	FALSE	FALSE	FALSE	FALSE	FALSE	FALSE
P51659	HSD17B4	Peroxisomal multifunctional enzyme type 2	0.95775	0.63458	0.68551	0.96774	TRUE	FALSE	FALSE	TRUE	0.498808	0.908488	0.175985	-0.502203	0.987888	0.220802	0.929623	0.997936	0.0798081	-1.00101	0.92663	0.0209753	0.430814	1	0.401017	1.43183	0.401415	0.0147414	FALSE	FALSE	FALSE	FALSE	FALSE	FALSE
Q6YN16	HSDL2	Hydroxysteroid dehydrogenase-like protein 2	0.90386	0.71067	0.68551	0	TRUE	FALSE	FALSE	FALSE	0.721075	0.948413	0.379612	2.54676	0.955973	0.0106849	3.19172	0.996136	0.011306	1.82568	0.963119	0.0562361	2.47064	1	0.0424985	0.644962	0.918867	0.597786	FALSE	FALSE	FALSE	FALSE	FALSE	FALSE
P07900	HSP90AA1	Heat shock protein HSP 90-alpha	0.88431	0.78042	0.574	0.99403	TRUE	TRUE	FALSE	TRUE	0.726246	0.830403	0.0755891	0.449161	0.989505	0.310845	1.56613	0.995978	0.0100379	-0.277085	0.991643	0.528173	0.839884	1	0.140524	1.11697	0.661082	0.0690656	FALSE	FALSE	FALSE	FALSE	FALSE	FALSE
P08238	HSP90AB1	Heat shock protein HSP 90-beta	0.86352	0.84991	0.92057	0.98667	TRUE	TRUE	TRUE	TRUE	-0.515427	0.922269	0.219281	-0.980594	0.976268	0.0439311	-0.86569	0.998297	0.147959	-0.465167	0.988334	0.317861	-0.350263	1	0.548501	0.114904	0.93819	0.852108	FALSE	FALSE	FALSE	FALSE	FALSE	FALSE
P14625	HSP90B1	Endoplasmin	0.8716	0.82087	0.9821	0.98888	TRUE	TRUE	TRUE	TRUE	-0.463883	0.886446	0.131354	-0.714066	0.976062	0.0430432	-0.104872	0.999034	0.803424	-0.250183	0.990787	0.455727	0.359012	1	0.398488	0.609194	0.809927	0.183331	FALSE	FALSE	FALSE	FALSE	FALSE	FALSE
O43301	HSPA12A	Heat shock 70 kDa protein 12A	0.98411	0.82011	0.91982	0	TRUE	TRUE	TRUE	FALSE	0.0317299	0.974774	0.962109	1.18135	0.984717	0.125968	4.7552	0.970383	7.22e-05	1.14962	0.979622	0.135805	4.72347	1	7.77e-05	3.57386	0.109748	0.00194954	FALSE	FALSE	FALSE	FALSE	FALSE	FALSE
Q96MM6	HSPA12B	Heat shock 70 kDa protein 12B	0.92289	0.89555	0.79026	0	TRUE	TRUE	TRUE	FALSE	0.0990238	0.973782	0.916885	2.77257	0.963456	0.0162066	4.80436	0.99271	0.00189146	2.67354	0.923528	0.0197852	4.70534	1	0.00223532	2.0318	0.795617	0.164804	FALSE	FALSE	FALSE	FALSE	FALSE	FALSE
P0DMV8;P0DMV9	HSPA1A	Heat shock 70 kDa protein 1A;Heat shock 70 kDa protein 1B	0.88416	0.89227	0.76741	0.98864	TRUE	TRUE	TRUE	TRUE	NA	NA	NA	NA	NA	NA	NA	NA	NA	NA	NA	NA	NA	NA	NA	NA	NA	NA	NA	NA	NA	NA	NA	NA
P54652	HSPA2	Heat shock-related 70 kDa protein 2	0.78295	0.86879	0.93745	0.99402	TRUE	TRUE	TRUE	TRUE	0.0964561	0.970135	0.777379	0.00232667	0.993836	0.995127	0.308597	0.99887	0.524321	-0.0941294	0.993716	0.805022	0.212141	1	0.660656	0.306271	0.913753	0.551054	FALSE	FALSE	FALSE	FALSE	FALSE	FALSE
P34932	HSPA4	Heat shock 70 kDa protein 4	0.90178	0.86732	0.9072	0.68551	TRUE	TRUE	TRUE	FALSE	-0.0568664	0.972923	0.880494	-0.0760749	0.993346	0.857257	0.142085	0.999028	0.790671	-0.0192084	0.994465	0.963761	0.198951	1	0.710397	0.21816	0.928116	0.7011	FALSE	FALSE	FALSE	FALSE	FALSE	FALSE
O95757	HSPA4L	Heat shock 70 kDa protein 4L	0.9676	0.89254	0.76506	0.68551	TRUE	TRUE	TRUE	FALSE	0.593731	0.932492	0.264993	1.38335	0.971	0.0274979	1.30817	0.998011	0.0898217	0.789623	0.983551	0.187951	0.714442	1	0.340612	-0.0751818	0.942001	0.923714	FALSE	FALSE	FALSE	FALSE	FALSE	FALSE
P11021	HSPA5	Endoplasmic reticulum chaperone BiP	0.83503	0.78479	0.986	0.98767	TRUE	TRUE	TRUE	TRUE	-0.46506	0.894958	0.146023	-0.697038	0.978675	0.0565942	-1.03981	0.997104	0.0272524	-0.231978	0.991408	0.506547	-0.574755	1	0.200857	-0.342777	0.902154	0.465029	FALSE	FALSE	FALSE	FALSE	FALSE	FALSE
P11142	HSPA8	Heat shock cognate 71 kDa protein	0.84805	0.88424	0.91931	0.99345	TRUE	TRUE	TRUE	TRUE	0.0566981	0.973272	0.894981	0.461834	0.989924	0.342235	0.32171	0.998921	0.597723	0.405135	0.990018	0.403395	0.265012	1	0.663398	-0.140123	0.936781	0.827899	FALSE	FALSE	FALSE	FALSE	FALSE	FALSE
P38646	HSPA9	Stress-70 protein, mitochondrial	0.94774	0.82756	0.98511	0.97056	TRUE	TRUE	TRUE	TRUE	-0.802962	0.43701	0.00965568	-0.869218	0.957853	0.0117715	-0.639318	0.998186	0.120741	-0.0662558	0.993865	0.833377	0.163644	1	0.681762	0.2299	0.917821	0.587699	FALSE	FALSE	FALSE	FALSE	FALSE	FALSE
P04792	HSPB1	Heat shock protein beta-1	0.72394	0.83534	0.88678	0.98333	FALSE	TRUE	TRUE	TRUE	-0.264523	0.959325	0.520103	0.335873	0.991178	0.465857	-0.966036	0.998118	0.107387	0.600396	0.98418	0.199474	-0.701513	1	0.234395	-1.30191	0.600318	0.0450801	FALSE	FALSE	FALSE	FALSE	FALSE	FALSE
O14558	HSPB6	Heat shock protein beta-6	0.78025	0.81996	0.68551	0	TRUE	TRUE	FALSE	FALSE	NA	NA	NA	NA	NA	NA	NA	NA	NA	NA	NA	NA	NA	NA	NA	NA	NA	NA	NA	NA	NA	NA	NA	NA
P10809	HSPD1	60 kDa heat shock protein, mitochondrial	0.87115	0.84898	0.71719	0.99104	TRUE	TRUE	FALSE	TRUE	0.314647	0.94945	0.390007	0.263041	0.991585	0.518481	0.794563	0.99824	0.13309	-0.0516062	0.994182	0.898626	0.479916	1	0.35468	0.531522	0.875511	0.334336	FALSE	FALSE	FALSE	FALSE	FALSE	FALSE
P61604	HSPE1	10 kDa heat shock protein, mitochondrial	0.97744	0.68266	0.82795	0.91495	TRUE	FALSE	TRUE	TRUE	0.0101578	0.975103	0.977927	-0.653097	0.984615	0.123957	-0.390223	0.998815	0.45585	-0.663255	0.977703	0.118584	-0.400381	1	0.444393	0.262875	0.922412	0.634199	FALSE	FALSE	FALSE	FALSE	FALSE	FALSE
P98160	HSPG2	Basement membrane-specific heparan sulfate proteoglycan core protein	0.81043	0.71979	0.68551	0	TRUE	FALSE	FALSE	FALSE	NA	NA	NA	NA	NA	NA	NA	NA	NA	NA	NA	NA	NA	NA	NA	NA	NA	NA	NA	NA	NA	NA	NA	NA
Q7Z6Z7	HUWE1	E3 ubiquitin-protein ligase HUWE1	0.95005	0.66794	0.83685	0	TRUE	FALSE	TRUE	FALSE	0.382502	0.956808	0.480491	0.919652	0.98531	0.138622	1.89271	0.996864	0.0212893	0.53715	0.989574	0.377434	1.51021	1	0.0594082	0.973062	0.841169	0.237463	FALSE	FALSE	FALSE	FALSE	FALSE	FALSE
P05362	ICAM1	Intercellular adhesion molecule 1	0.87131	0.69375	0.78558	0	TRUE	FALSE	TRUE	FALSE	NA	NA	NA	NA	NA	NA	NA	NA	NA	NA	NA	NA	NA	NA	NA	NA	NA	NA	NA	NA	NA	NA	NA	NA
Q9UMF0	ICAM5	Intercellular adhesion molecule 5	0.96593	0.87179	0.97712	0.97837	TRUE	TRUE	TRUE	TRUE	-1.16901	0.30475	0.00422602	-1.08185	0.961482	0.0143954	-0.303766	0.998893	0.555502	0.0871667	0.993847	0.829848	0.865246	1	0.104136	0.77808	0.794912	0.163969	FALSE	FALSE	FALSE	FALSE	FALSE	FALSE
O75874	IDH1	Isocitrate dehydrogenase [NADP] cytoplasmic	0.69575	0.79631	0.8487	0.95383	FALSE	TRUE	TRUE	TRUE	-0.183992	0.966835	0.679206	0.33174	0.991497	0.506454	0.522092	0.998771	0.410034	0.515731	0.988037	0.30584	0.706083	1	0.268904	0.190352	0.933464	0.775193	FALSE	FALSE	FALSE	FALSE	FALSE	FALSE
P48735	IDH2	Isocitrate dehydrogenase [NADP], mitochondrial	0.68246	0.75437	0.8306	0	FALSE	TRUE	TRUE	FALSE	0.650149	0.923255	0.223075	2.68242	0.697674	0.000192609	3.9922	0.955745	3.24e-05	2.03227	0.669895	0.00238148	3.34205	1	0.000224766	1.30978	0.728836	0.107285	FALSE	FALSE	FALSE	FALSE	FALSE	FALSE
P50213	IDH3A	Isocitrate dehydrogenase [NAD] subunit alpha, mitochondrial	0.98798	0.71058	0.68551	0.68551	TRUE	FALSE	FALSE	FALSE	0.350222	0.950696	0.403174	0.280614	0.991785	0.5472	0.191064	0.999006	0.74503	-0.0696079	0.994099	0.880735	-0.159158	1	0.786377	-0.0895505	0.940036	0.885599	FALSE	FALSE	FALSE	FALSE	FALSE	FALSE
P01876	IGHA1	Immunoglobulin heavy constant alpha 1	0.68874	0.68274	0.79313	0.96817	FALSE	FALSE	TRUE	TRUE	-0.389559	0.954079	0.44306	-0.732521	0.987473	0.203615	-2.25498	0.994818	0.00481807	-0.342962	0.991811	0.544589	-1.86542	1	0.0160329	-1.52245	0.632569	0.0558383	FALSE	FALSE	FALSE	FALSE	FALSE	FALSE
P01877	IGHA2	Immunoglobulin heavy constant alpha 2	0.70433	0.71634	0.79821	0.98604	FALSE	FALSE	TRUE	TRUE	0.269724	0.968998	0.741008	-0.784643	0.990512	0.393929	-3.51961	0.99525	0.00617673	-1.05437	0.986555	0.255785	-3.78933	1	0.00365894	-2.73497	0.561184	0.0357064	FALSE	FALSE	FALSE	FALSE	FALSE	FALSE
P01857	IGHG1	Immunoglobulin heavy constant gamma 1	0.50076	0.61933	0.95249	0.99363	FALSE	FALSE	TRUE	TRUE	-0.0205355	0.974936	0.969827	0.108872	0.993348	0.857714	-0.965379	0.998493	0.218455	0.129407	0.993854	0.831279	-0.944844	1	0.228002	-1.07425	0.819477	0.197596	FALSE	FALSE	FALSE	FALSE	FALSE	FALSE
P01859	IGHG2	Immunoglobulin heavy constant gamma 2	0.82423	0.65289	0.92865	0.99396	TRUE	FALSE	TRUE	TRUE	-0.0849955	0.971556	0.827263	0.390933	0.990303	0.374357	-0.234061	0.998966	0.671477	0.475929	0.987386	0.282001	-0.149066	1	0.786764	-0.624995	0.862806	0.292001	FALSE	FALSE	FALSE	FALSE	FALSE	FALSE
P01860	IGHG3	Immunoglobulin heavy constant gamma 3	0.80665	0.71558	0.9927	0.98925	TRUE	FALSE	TRUE	TRUE	0.418683	0.931067	0.257672	0.617998	0.985375	0.14012	0.127139	0.999035	0.804686	0.199315	0.992529	0.624745	-0.291544	1	0.572077	-0.490859	0.884997	0.373011	FALSE	FALSE	FALSE	FALSE	FALSE	FALSE
P01871	IGHM	Immunoglobulin heavy constant mu	0.80954	0.76489	0.83998	0.68551	TRUE	TRUE	TRUE	FALSE	-0.354962	0.957751	0.494702	-1.5977	0.957622	0.0116293	-1.46871	0.997698	0.0562892	-1.24273	0.955252	0.042467	-1.11375	1	0.139322	0.128988	0.93907	0.867801	FALSE	FALSE	FALSE	FALSE	FALSE	FALSE
A0A0C4DH31	IGHV1-18	Immunoglobulin heavy variable 1-18	0.82136	0.29987	0	0	TRUE	FALSE	FALSE	FALSE	NA	NA	NA	NA	NA	NA	NA	NA	NA	NA	NA	NA	NA	NA	NA	NA	NA	NA	NA	NA	NA	NA	NA	NA
A0A0A0MS15	IGHV3-49	Immunoglobulin heavy variable 3-49	0.76232	0	0	0	TRUE	FALSE	FALSE	FALSE	NA	NA	NA	NA	NA	NA	NA	NA	NA	NA	NA	NA	NA	NA	NA	NA	NA	NA	NA	NA	NA	NA	NA	NA
P01782;P0DP04	IGHV3-9;IGHV3-43D	Immunoglobulin heavy variable 3-9;Immunoglobulin heavy variable 3-43D	0.8609	0.06804	0	0	TRUE	FALSE	FALSE	FALSE	NA	NA	NA	NA	NA	NA	NA	NA	NA	NA	NA	NA	NA	NA	NA	NA	NA	NA	NA	NA	NA	NA	NA	NA
A0A0C4DH41;P01824;P01825;P06331;P0DP06;P0DP08	IGHV4-61;IGHV4-39;IGHV4-59;IGHV4-34;IGHV4-30-4;IGHV4-38-2	Immunoglobulin heavy variable 4-61;Immunoglobulin heavy variable 4-39;Immunoglobulin heavy variable 4-59;Immunoglobulin heavy variable 4-34;Immunoglobulin heavy variable 4-30-4;Immunoglobulin heavy variable 4-38-2	0.76617	0.31047	0	0	TRUE	FALSE	FALSE	FALSE	NA	NA	NA	NA	NA	NA	NA	NA	NA	NA	NA	NA	NA	NA	NA	NA	NA	NA	NA	NA	NA	NA	NA	NA
P01834	IGKC	Immunoglobulin kappa constant	0.62063	0.72262	0.8587	0.94702	FALSE	FALSE	TRUE	TRUE	0.504686	0.936707	0.288896	0.654905	0.987888	0.220811	-0.456799	0.998846	0.493276	0.150219	0.993545	0.77446	-0.961486	1	0.158214	-1.1117	0.755453	0.125889	FALSE	FALSE	FALSE	FALSE	FALSE	FALSE
A0A087WW87;P01614	IGKV2-40;IGKV2D-40	Immunoglobulin kappa variable 2-40;Immunoglobulin kappa variable 2D-40	0.84247	0.44888	0.68551	0.9821	TRUE	FALSE	FALSE	TRUE	0.564616	0.953249	0.432665	-0.199432	0.993127	0.802715	0.24777	0.999036	0.806154	-0.764048	0.988925	0.34418	-0.316846	1	0.753798	0.447202	0.926148	0.676744	FALSE	FALSE	FALSE	FALSE	FALSE	FALSE
P01624	IGKV3-15	Immunoglobulin kappa variable 3-15	0.43333	0.48414	0.90689	0.74723	FALSE	FALSE	TRUE	FALSE	1.06383	0.9422	0.326193	-0.875231	0.99119	0.467254	-0.581133	0.998983	0.701235	-1.93906	0.977522	0.11715	-1.64496	1	0.284302	0.294098	0.938328	0.854525	FALSE	FALSE	FALSE	FALSE	FALSE	FALSE
P01619	IGKV3-20	Immunoglobulin kappa variable 3-20	0.62892	0.62256	0.8368	0.93851	FALSE	FALSE	TRUE	TRUE	0.498275	0.925547	0.232354	-0.724094	0.984694	0.125521	-1.76103	0.995282	0.00629754	-1.22237	0.903333	0.0142327	-2.2593	1	0.000901734	-1.03693	0.722583	0.103506	FALSE	FALSE	FALSE	FALSE	FALSE	FALSE
P06312	IGKV4-1	Immunoglobulin kappa variable 4-1	0.42925	0.6194	0.68551	0.97747	FALSE	FALSE	FALSE	TRUE	0.660891	0.934428	0.275528	-0.495326	0.991135	0.4607	-1.52344	0.997964	0.083317	-1.15622	0.974211	0.0953672	-2.18433	1	0.0169959	-1.02811	0.850474	0.258698	FALSE	FALSE	FALSE	FALSE	FALSE	FALSE
P0DOY2	IGLC2	Immunoglobulin lambda constant 2	0.55241	0.30446	0.37623	0.95947	FALSE	FALSE	FALSE	TRUE	0.274531	0.965554	0.646588	1.0845	0.984224	0.116679	-1.59537	0.997862	0.0712647	0.809966	0.985761	0.234267	-1.8699	1	0.0374137	-2.67987	0.260305	0.00708329	FALSE	FALSE	FALSE	FALSE	FALSE	FALSE
B9A064	IGLL5	Immunoglobulin lambda-like polypeptide 5	0.90914	0.69496	0.74079	0.95785	TRUE	FALSE	FALSE	TRUE	0.495828	0.958909	0.513167	0.0110482	0.993818	0.989539	0.701707	0.998862	0.51287	-0.48478	0.992027	0.56688	0.205879	1	0.846916	0.690659	0.912841	0.543358	FALSE	FALSE	FALSE	FALSE	FALSE	FALSE
Q96ID5	IGSF21	Immunoglobulin superfamily member 21	0.97486	0.79811	0.98092	0.68551	TRUE	TRUE	TRUE	FALSE	0.433611	0.92421	0.226865	-0.921612	0.971484	0.0285912	-0.150103	0.999015	0.762947	-1.35522	0.683562	0.00254836	-0.583714	1	0.249116	0.771509	0.787007	0.15503	FALSE	FALSE	FALSE	FALSE	FALSE	FALSE
Q969P0	IGSF8	Immunoglobulin superfamily member 8	0.77932	0.83467	0.75274	0.98314	TRUE	TRUE	TRUE	TRUE	0.312982	0.952022	0.418037	0.556869	0.987473	0.203633	0.836907	0.998245	0.134403	0.243887	0.992062	0.570643	0.523925	1	0.339526	0.280038	0.92174	0.627012	FALSE	FALSE	FALSE	FALSE	FALSE	FALSE
Q9UPX0	IGSF9B	Protein turtle homolog B	0.93122	0.90428	0	0	TRUE	TRUE	FALSE	FALSE	0.946199	0.851967	0.0913263	3.10361	0.488376	5.5e-05	3.10361	0.988628	0.000611622	2.15741	0.617792	0.0018676	2.15741	1	0.0100221	0	0.945566	1	FALSE	FALSE	FALSE	FALSE	FALSE	FALSE
P18510	IL1RN	Interleukin-1 receptor antagonist protein	0.62741	0.5428	0.83574	0.98953	FALSE	FALSE	TRUE	TRUE	0.0897871	0.972489	0.86298	0.184489	0.992904	0.751352	-0.555975	0.998812	0.453263	0.0947019	0.994051	0.870661	-0.645762	1	0.384992	-0.740464	0.879185	0.348495	FALSE	FALSE	FALSE	FALSE	FALSE	FALSE
Q9NZH8	IL36G	Interleukin-36 gamma	0.53907	0.27819	0.68551	0.96667	FALSE	FALSE	FALSE	TRUE	0.178975	0.967741	0.703982	0.837467	0.984588	0.123445	-0.803873	0.998529	0.235886	0.658492	0.985165	0.220031	-0.982848	1	0.151091	-1.64134	0.527516	0.0296646	FALSE	FALSE	FALSE	FALSE	FALSE	FALSE
Q12905	ILF2	Interleukin enhancer-binding factor 2	0.86262	0.09351	0.68551	0	TRUE	FALSE	FALSE	FALSE	NA	NA	NA	NA	NA	NA	NA	NA	NA	NA	NA	NA	NA	NA	NA	NA	NA	NA	NA	NA	NA	NA	NA	NA
Q12906	ILF3	Interleukin enhancer-binding factor 3	0.55205	0.85766	0.68551	0	FALSE	TRUE	FALSE	FALSE	-0.562498	0.962966	0.588259	0.892239	0.990994	0.444337	2.23892	0.99826	0.138114	1.45474	0.985093	0.218427	2.80142	1	0.0679588	1.34669	0.888779	0.39054	FALSE	FALSE	FALSE	FALSE	FALSE	FALSE
Q16891	IMMT	MICOS complex subunit MIC60	0.90877	0.39075	0.68551	0	TRUE	FALSE	FALSE	FALSE	NA	NA	NA	NA	NA	NA	NA	NA	NA	NA	NA	NA	NA	NA	NA	NA	NA	NA	NA	NA	NA	NA	NA	NA
P29218	IMPA1	Inositol monophosphatase 1	0.89657	0.86785	0.98608	0.91802	TRUE	TRUE	TRUE	TRUE	-0.645379	0.893894	0.14404	-0.347525	0.991225	0.47151	-0.169117	0.999023	0.780449	0.297853	0.991728	0.536377	0.476262	1	0.435912	0.178409	0.933887	0.781599	FALSE	FALSE	FALSE	FALSE	FALSE	FALSE
Q16352	INA	Alpha-internexin	0.87062	0.83238	0.83628	0.96566	TRUE	TRUE	TRUE	TRUE	0.429745	0.927654	0.241488	0.349997	0.990464	0.389292	0.445368	0.998747	0.386516	-0.079748	0.993914	0.842955	0.0156223	1	0.97551	0.0953703	0.938625	0.859812	FALSE	FALSE	FALSE	FALSE	FALSE	FALSE
P49441	INPP1	Inositol polyphosphate 1-phosphatase	0.9887	0.66276	0	0.68551	TRUE	FALSE	FALSE	FALSE	1.71114	0.447988	0.0104621	3.59341	0.435468	4.15e-05	2.11046	0.996928	0.0227012	1.88227	0.887826	0.0115525	0.39932	1	0.64321	-1.48295	0.742494	0.116277	FALSE	FALSE	FALSE	FALSE	FALSE	FALSE
O00410	IPO5	Importin-5	0.98788	0.7592	0.76105	0.68551	TRUE	TRUE	TRUE	FALSE	0.856542	0.857075	0.0958635	0.293404	0.992102	0.597012	0.850998	0.998524	0.232951	-0.563138	0.988271	0.315224	-0.0055437	1	0.993674	0.557594	0.900677	0.455681	FALSE	FALSE	FALSE	FALSE	FALSE	FALSE
P46940	IQGAP1	Ras GTPase-activating-like protein IQGAP1	0.47349	0.74724	0.47519	0.98098	FALSE	FALSE	FALSE	TRUE	0.133123	0.971928	0.841207	-0.439084	0.991845	0.556191	0.0907838	0.999087	0.923001	-0.572206	0.990637	0.444655	-0.0423387	1	0.964043	0.529868	0.918707	0.596228	FALSE	FALSE	FALSE	FALSE	FALSE	FALSE
Q13683	ITGA7	Integrin alpha-7	0.69304	0.51262	0.68551	0.96764	FALSE	FALSE	FALSE	TRUE	0.202594	0.967607	0.700207	-0.934566	0.984604	0.12376	-1.9815	0.996436	0.0144067	-1.13716	0.966602	0.0650345	-2.1841	1	0.00793587	-1.04694	0.81739	0.194331	FALSE	FALSE	FALSE	FALSE	FALSE	FALSE
P05556	ITGB1	Integrin beta-1	0.68866	0.78341	0.0754	0	FALSE	TRUE	FALSE	FALSE	0.614238	0.943181	0.33373	2.08179	0.948143	0.00746105	2.60499	0.995657	0.00800621	1.46755	0.958782	0.0478324	1.99075	1	0.0351975	0.523194	0.916971	0.579713	FALSE	FALSE	FALSE	FALSE	FALSE	FALSE
P26012	ITGB8	Integrin beta-8	0.9447	0.41215	0	0	TRUE	FALSE	FALSE	FALSE	1.84082	0.770298	0.0490334	3.65461	0.887211	0.00146066	3.65461	0.99571	0.00830032	1.81379	0.970802	0.0792926	1.81379	1	0.158738	2.22e-16	0.945566	1	FALSE	FALSE	FALSE	FALSE	FALSE	FALSE
P19827	ITIH1	Inter-alpha-trypsin inhibitor heavy chain H1	0.47226	0.75477	0.57226	0.95061	FALSE	TRUE	FALSE	TRUE	-1.06808	0.76849	0.0484749	-1.36376	0.970507	0.0264474	-3.80038	0.962627	4.52e-05	-0.295682	0.992381	0.606759	-2.7323	1	0.00121995	-2.43662	0.199375	0.00473776	FALSE	FALSE	FALSE	FALSE	FALSE	FALSE
P19823	ITIH2	Inter-alpha-trypsin inhibitor heavy chain H2	0.83038	0.49819	0.68551	0	TRUE	FALSE	FALSE	FALSE	NA	NA	NA	NA	NA	NA	NA	NA	NA	NA	NA	NA	NA	NA	NA	NA	NA	NA	NA	NA	NA	NA	NA	NA
Q14643	ITPR1	Inositol 1,4,5-trisphosphate receptor type 1	0.9307	0.73427	0	0	TRUE	FALSE	FALSE	FALSE	0.422277	0.96672	0.676148	2.25246	0.978858	0.057768	2.25246	0.998212	0.12656	1.83018	0.977503	0.117005	1.83018	1	0.209488	0	0.945566	1	FALSE	FALSE	FALSE	FALSE	FALSE	FALSE
P01591	JCHAIN	Immunoglobulin J chain	0.68108	0.60136	0.84958	0.9498	FALSE	FALSE	TRUE	TRUE	0.155347	0.971282	0.817249	-0.0126227	0.993808	0.986591	-2.1746	0.997252	0.0321317	-0.16797	0.993812	0.823151	-2.32995	1	0.0228444	-2.16198	0.592917	0.0430521	FALSE	FALSE	FALSE	FALSE	FALSE	FALSE
O94819	KBTBD11	Kelch repeat and BTB domain-containing protein 11	0.98895	0.79173	0.68551	0	TRUE	TRUE	FALSE	FALSE	0.0666077	0.973569	0.907607	2.86873	0.733534	0.000252158	3.76732	0.980316	0.000172041	2.80212	0.345669	0.000318433	3.70071	1	0.000206676	0.898588	0.866614	0.303724	FALSE	FALSE	FALSE	FALSE	FALSE	FALSE
Q96CX2	KCTD12	BTB/POZ domain-containing protein KCTD12	0.96317	0.74751	0.91043	0.68551	TRUE	FALSE	TRUE	FALSE	0.140741	0.971742	0.834194	-0.516209	0.991409	0.49484	-0.826029	0.99875	0.389667	-0.65695	0.989741	0.386889	-0.96677	1	0.315865	-0.30982	0.93236	0.758857	FALSE	FALSE	FALSE	FALSE	FALSE	FALSE
Q92945	KHSRP	Far upstream element-binding protein 2	0.807	0.65787	0.68551	0	TRUE	FALSE	FALSE	FALSE	1.07106	0.907196	0.172683	2.70721	0.936487	0.00482248	3.76891	0.993285	0.00235527	1.63614	0.967643	0.0681343	2.69785	1	0.0209395	1.0617	0.882116	0.360511	FALSE	FALSE	FALSE	FALSE	FALSE	FALSE
O00139	KIF2A	Kinesin-like protein KIF2A	0.92124	0.66671	0	0	TRUE	FALSE	FALSE	FALSE	1.31189	0.835162	0.0786562	2.64668	0.925431	0.0034348	2.64668	0.996552	0.0159257	1.33479	0.976123	0.107001	1.33479	1	0.196566	0	0.945566	1	FALSE	FALSE	FALSE	FALSE	FALSE	FALSE
O43240	KLK10	Kallikrein-10	0.82267	0.25335	0.68551	0.68551	TRUE	FALSE	FALSE	FALSE	0.426039	0.952329	0.421618	0.861631	0.985939	0.15409	0.704514	0.998704	0.34897	0.435592	0.990866	0.461743	0.278475	1	0.708336	-0.157117	0.937613	0.842048	FALSE	FALSE	FALSE	FALSE	FALSE	FALSE
Q92876	KLK6	Kallikrein-6	0.85743	0.74814	0.68551	0	TRUE	FALSE	FALSE	FALSE	NA	NA	NA	NA	NA	NA	NA	NA	NA	NA	NA	NA	NA	NA	NA	NA	NA	NA	NA	NA	NA	NA	NA	NA
P49862	KLK7	Kallikrein-7	0.53175	0.43918	0.68551	0.95475	FALSE	FALSE	FALSE	TRUE	0.856647	0.750345	0.0433754	0.29244	0.991564	0.515616	0.278993	0.998937	0.623012	-0.564206	0.985025	0.216912	-0.577653	1	0.314053	-0.013447	0.94477	0.982117	FALSE	FALSE	FALSE	FALSE	FALSE	FALSE
Q14974	KPNB1	Importin subunit beta-1	0.96625	0.75872	0.8397	0.68551	TRUE	TRUE	TRUE	FALSE	0.647993	0.890086	0.137304	0.799172	0.983414	0.103389	0.256434	0.998965	0.668678	0.151179	0.993397	0.749343	-0.391558	1	0.514885	-0.542737	0.890042	0.396699	FALSE	FALSE	FALSE	FALSE	FALSE	FALSE
Q5T749	KPRP	Keratinocyte proline-rich protein	0.72287	0.56271	0.61324	0.99231	FALSE	FALSE	FALSE	TRUE	-0.343551	0.957445	0.490016	-0.0510348	0.993602	0.92644	-1.54342	0.997394	0.0379684	0.292516	0.992307	0.598076	-1.19987	1	0.0987783	-1.49239	0.63329	0.0561224	FALSE	FALSE	FALSE	FALSE	FALSE	FALSE
P01116	KRAS	GTPase KRas	0.98938	0.80238	0.87817	0.68552	TRUE	TRUE	TRUE	FALSE	0.467896	0.94419	0.34181	-0.0669617	0.993514	0.901934	-0.9127	0.998437	0.19473	-0.534857	0.988647	0.331365	-1.3806	1	0.0565321	-0.845738	0.848805	0.254667	FALSE	FALSE	FALSE	FALSE	FALSE	FALSE
P13646	KRT13	Keratin, type I cytoskeletal 13	0.43681	0.63189	0.78718	0.98568	FALSE	FALSE	TRUE	TRUE	-0.40358	0.967277	0.691095	-1.89054	0.983698	0.107784	-3.63775	0.996748	0.0190477	-1.48696	0.984196	0.199788	-3.23417	1	0.0343425	-1.74721	0.850578	0.258953	FALSE	FALSE	FALSE	FALSE	FALSE	FALSE
P32004	L1CAM	Neural cell adhesion molecule L1	0.94571	0.91598	0.98706	0.98338	TRUE	TRUE	TRUE	TRUE	-0.264904	0.952358	0.421954	-0.0175821	0.993725	0.961631	0.42594	0.99872	0.362487	0.247322	0.991349	0.501318	0.690844	1	0.146959	0.443522	0.884573	0.371125	FALSE	FALSE	FALSE	FALSE	FALSE	FALSE
P11047	LAMC1	Laminin subunit gamma-1	0.90587	0.68012	0	0	TRUE	FALSE	FALSE	FALSE	NA	NA	NA	NA	NA	NA	NA	NA	NA	NA	NA	NA	NA	NA	NA	NA	NA	NA	NA	NA	NA	NA	NA	NA
P11279	LAMP1	Lysosome-associated membrane glycoprotein 1	0.68751	0.75186	0.3616	0.97893	FALSE	TRUE	FALSE	TRUE	0.318693	0.96057	0.54182	-0.221683	0.992678	0.703368	-0.219416	0.999016	0.765559	-0.540376	0.989208	0.358073	-0.538109	1	0.467365	0.00226722	0.945464	0.997679	FALSE	FALSE	FALSE	FALSE	FALSE	FALSE
P13473	LAMP2	Lysosome-associated membrane glycoprotein 2	0.87858	0.82466	0.89653	0.97506	TRUE	TRUE	TRUE	TRUE	-1.411	0.500674	0.0135442	-1.85209	0.936415	0.00481085	-1.39853	0.997861	0.0711882	-0.441097	0.990769	0.454351	0.0124712	1	0.986552	0.453568	0.915364	0.565097	FALSE	FALSE	FALSE	FALSE	FALSE	FALSE
Q0VGL1	LAMTOR4	Ragulator complex protein LAMTOR4	0.8975	0.94182	0.68551	0	TRUE	TRUE	FALSE	FALSE	0.735648	0.950151	0.397324	2.63893	0.9586	0.0122493	3.43365	0.996016	0.0103187	1.90328	0.964712	0.059989	2.698	1	0.0372241	0.794717	0.912459	0.540185	FALSE	FALSE	FALSE	FALSE	FALSE	FALSE
O43813	LANCL1	Glutathione S-transferase LANCL1	0.90177	0.72622	0.89613	0.88171	TRUE	FALSE	TRUE	TRUE	0.310205	0.961602	0.561021	0.48598	0.990747	0.417421	1.3708	0.997942	0.0805903	0.175774	0.993505	0.767482	1.0606	1	0.169219	0.884821	0.856735	0.274782	FALSE	FALSE	FALSE	FALSE	FALSE	FALSE
P28838	LAP3	Cytosol aminopeptidase	0.90827	0.84821	0.97321	0.94216	TRUE	TRUE	TRUE	TRUE	-0.716909	0.844485	0.085296	-0.415031	0.99012	0.358377	0.506906	0.998734	0.374784	0.301878	0.991354	0.501725	1.22381	1	0.0412509	0.921937	0.767516	0.135954	FALSE	FALSE	FALSE	FALSE	FALSE	FALSE
Q14847	LASP1	LIM and SH3 domain protein 1	0.93853	0.65677	0.834	0.68551	TRUE	FALSE	TRUE	FALSE	-0.875283	0.907354	0.17308	-1.87792	0.960907	0.0139246	-1.11444	0.998492	0.217765	-1.00264	0.981957	0.163289	-0.239159	1	0.787179	0.763478	0.894587	0.42026	FALSE	FALSE	FALSE	FALSE	FALSE	FALSE
P31025	LCN1	Lipocalin-1	0.5451	0.53055	0.73128	0.99405	FALSE	FALSE	FALSE	TRUE	-0.222021	0.967538	0.698301	-1.82621	0.953653	0.00954001	-2.58478	0.994685	0.00448583	-1.60419	0.924692	0.020218	-2.36276	1	0.00826338	-0.758572	0.886852	0.381442	FALSE	FALSE	FALSE	FALSE	FALSE	FALSE
P80188	LCN2	Neutrophil gelatinase-associated lipocalin	0.70603	0.65618	0.68561	0.85634	FALSE	FALSE	FALSE	TRUE	0.0518511	0.974226	0.936672	-0.199869	0.993049	0.78434	0.420718	0.998953	0.649418	-0.25172	0.993281	0.730507	0.368867	1	0.69003	0.620587	0.911003	0.528386	FALSE	FALSE	FALSE	FALSE	FALSE	FALSE
P13796	LCP1	Plastin-2	0.96616	0.32137	0.82982	0.98848	TRUE	FALSE	TRUE	TRUE	-0.202365	0.966867	0.680045	-0.781851	0.986317	0.164572	-0.942307	0.99841	0.184344	-0.579485	0.987809	0.297122	-0.739941	1	0.292706	-0.160456	0.936736	0.827139	FALSE	FALSE	FALSE	FALSE	FALSE	FALSE
P00338	LDHA	L-lactate dehydrogenase A chain	0.81113	0.75944	0.73266	0.96308	TRUE	TRUE	FALSE	TRUE	-0.04398	0.973821	0.918598	-0.147499	0.99294	0.759445	-0.491784	0.998784	0.423185	-0.103519	0.993846	0.829728	-0.447804	1	0.465146	-0.344286	0.918601	0.595196	FALSE	FALSE	FALSE	FALSE	FALSE	FALSE
P07195	LDHB	L-lactate dehydrogenase B chain	0.81615	0.87731	0.71774	0.97989	TRUE	TRUE	FALSE	TRUE	0.612924	0.900603	0.157376	0.67302	0.986315	0.164524	1.05358	0.99801	0.0897013	0.0600964	0.994181	0.898508	0.440661	1	0.462987	0.380565	0.913523	0.549096	FALSE	FALSE	FALSE	FALSE	FALSE	FALSE
P09382	LGALS1	Galectin-1	0.83402	0.85871	0.95024	0.96601	TRUE	TRUE	TRUE	TRUE	-0.596855	0.811926	0.0653498	-0.588694	0.98322	0.100527	0.38049	0.998749	0.388169	0.00816017	0.994536	0.981126	0.977345	1	0.0355367	0.969184	0.609252	0.0477229	FALSE	FALSE	FALSE	FALSE	FALSE	FALSE
P17931	LGALS3	Galectin-3	0.89561	0.79017	0.92745	0.98136	TRUE	TRUE	TRUE	TRUE	0.211862	0.964856	0.629914	0.0419797	0.993621	0.931731	0.0332503	0.999101	0.957217	-0.169883	0.993273	0.729245	-0.178612	1	0.773461	-0.00872942	0.945097	0.989405	FALSE	FALSE	FALSE	FALSE	FALSE	FALSE
Q08380	LGALS3BP	Galectin-3-binding protein	0.78587	0.80289	0.85883	0.94086	TRUE	TRUE	TRUE	TRUE	-1.26854	0.436626	0.0096292	-0.85844	0.982955	0.0968108	-0.951467	0.998276	0.142183	0.410104	0.990183	0.413726	0.317077	1	0.615285	-0.0930271	0.940221	0.889081	FALSE	FALSE	FALSE	FALSE	FALSE	FALSE
Q3ZCW2	LGALSL	Galectin-related protein	0.75832	0.62859	0.68551	0	TRUE	FALSE	FALSE	FALSE	0.102771	0.972055	0.846053	2.34925	0.846291	0.000779321	3.27296	0.984922	0.000313583	2.24648	0.503816	0.00115572	3.17019	1	0.000427399	0.923715	0.848175	0.253173	FALSE	FALSE	FALSE	FALSE	FALSE	FALSE
O95970	LGI1	Leucine-rich glioma-inactivated protein 1	0.92088	0.88246	0.68551	0	TRUE	TRUE	FALSE	FALSE	NA	NA	NA	NA	NA	NA	NA	NA	NA	NA	NA	NA	NA	NA	NA	NA	NA	NA	NA	NA	NA	NA	NA	NA
Q8N145	LGI3	Leucine-rich repeat LGI family member 3	0.93202	0.68551	0	0	TRUE	FALSE	FALSE	FALSE	1.90588	0.180594	0.00198031	2.21072	0.887318	0.0014635	2.21072	0.995712	0.00831269	0.304836	0.992423	0.611796	0.304836	1	0.687855	0	0.945566	1	FALSE	FALSE	FALSE	FALSE	FALSE	FALSE
Q9H008	LHPP	Phospholysine phosphohistidine inorganic pyrophosphate phosphatase	0.90375	0.40869	0.8972	0	TRUE	FALSE	TRUE	FALSE	-0.0847071	0.974319	0.940911	0.195136	0.993428	0.878641	3.39128	0.997569	0.0473159	0.279843	0.993831	0.826728	3.47599	1	0.0425872	3.19615	0.670816	0.0747521	FALSE	FALSE	FALSE	FALSE	FALSE	FALSE
Q15334	LLGL1	Lethal(2) giant larvae protein homolog 1	0.95953	0.85094	0	0	TRUE	TRUE	FALSE	FALSE	-0.34327	0.966089	0.65986	2.15398	0.967861	0.0217047	2.15398	0.997772	0.0624354	2.49725	0.868635	0.00925495	2.49725	1	0.0334081	0	0.945566	1	FALSE	FALSE	FALSE	FALSE	FALSE	FALSE
P02545	LMNA	Prelamin-A/C	0.91317	0.8021	0.90909	0.97208	TRUE	TRUE	TRUE	TRUE	-0.635471	0.889883	0.136962	-0.0651492	0.993463	0.888112	-1.23528	0.997552	0.0462883	0.570322	0.985485	0.227506	-0.599807	1	0.31266	-1.17013	0.666333	0.0720432	FALSE	FALSE	FALSE	FALSE	FALSE	FALSE
Q03252	LMNB2	Lamin-B2	0.83922	0.71789	0.82004	0.87484	TRUE	FALSE	TRUE	TRUE	0.174245	0.968902	0.738049	-1.02233	0.982548	0.0914505	-1.71171	0.997183	0.0297208	-1.19657	0.960751	0.0513595	-1.88596	1	0.0180468	-0.689382	0.886997	0.38211	FALSE	FALSE	FALSE	FALSE	FALSE	FALSE
P23490	LORICRIN	Loricrin	0.86797	0.25785	0.68551	0.91706	TRUE	FALSE	FALSE	TRUE	0.647619	0.930859	0.25663	0.0743464	0.993528	0.905593	-0.418753	0.998922	0.598783	-0.573273	0.98936	0.365906	-1.06637	1	0.189318	-0.493099	0.914728	0.559486	FALSE	FALSE	FALSE	FALSE	FALSE	FALSE
Q07954	LRP1	Prolow-density lipoprotein receptor-related protein 1	0.93583	0.83683	0.99045	0.98973	TRUE	TRUE	TRUE	TRUE	-0.554501	0.901875	0.160142	-0.619926	0.986162	0.160157	0.547267	0.998667	0.320164	-0.0654254	0.99409	0.878873	1.10177	1	0.0542716	1.16719	0.629183	0.0545342	FALSE	FALSE	FALSE	FALSE	FALSE	FALSE
Q8N1G4	LRRC47	Leucine-rich repeat-containing protein 47	0.96887	0.97308	0.82802	0	TRUE	TRUE	TRUE	FALSE	0.27656	0.965084	0.635281	2.36238	0.894414	0.0016715	3.9552	0.976579	0.000118059	2.08582	0.777853	0.00436629	3.67864	1	0.000250089	1.59283	0.679251	0.0803187	FALSE	FALSE	FALSE	FALSE	FALSE	FALSE
Q13449	LSAMP	Limbic system-associated membrane protein	0.97851	0.80104	0.97185	0.96127	TRUE	TRUE	TRUE	TRUE	-0.178144	0.965475	0.644652	-0.507516	0.98845	0.247435	0.963737	0.998008	0.0894694	-0.329372	0.990682	0.447976	1.14188	1	0.0474983	1.47125	0.445489	0.0187013	FALSE	FALSE	FALSE	FALSE	FALSE	FALSE
Q3MHD2	LSM12	Protein LSM12	0.89083	0	0	0	TRUE	FALSE	FALSE	FALSE	NA	NA	NA	NA	NA	NA	NA	NA	NA	NA	NA	NA	NA	NA	NA	NA	NA	NA	NA	NA	NA	NA	NA	NA
P09960	LTA4H	Leukotriene A-4 hydrolase	0.98867	0.81061	0.83978	0	TRUE	TRUE	TRUE	FALSE	-0.0280343	0.974923	0.96923	1.03758	0.987673	0.211655	2.76765	0.996373	0.0136671	1.06561	0.984212	0.200095	2.79568	1	0.0128825	1.73007	0.754132	0.124855	FALSE	FALSE	FALSE	FALSE	FALSE	FALSE
P02788	LTF	Lactotransferrin	0.76798	0.69688	0.82482	0.57241	TRUE	FALSE	TRUE	FALSE	0.186338	0.967154	0.687742	-0.707424	0.986884	0.182279	-1.64004	0.996818	0.0203568	-0.893761	0.974436	0.0966186	-1.82637	1	0.0110186	-0.932613	0.814281	0.189625	FALSE	FALSE	FALSE	FALSE	FALSE	FALSE
O94772	LY6H	Lymphocyte antigen 6H	0.95224	0.51632	0.83882	0	TRUE	FALSE	TRUE	FALSE	1.10844	0.863387	0.102014	1.6764	0.972668	0.0315516	3.34496	0.992429	0.00171181	0.567956	0.990573	0.44012	2.23652	1	0.0242808	1.66856	0.718058	0.100892	FALSE	FALSE	FALSE	FALSE	FALSE	FALSE
O75608	LYPLA1	Acyl-protein thioesterase 1	0.96048	0.61857	0.13022	0	TRUE	FALSE	FALSE	FALSE	-0.371923	0.964003	0.610515	3.14928	0.862593	0.000977958	4.25272	0.988033	0.000540612	3.5212	0.352111	0.000347571	4.62465	1	0.000239401	1.10344	0.871162	0.318767	FALSE	FALSE	FALSE	FALSE	FALSE	FALSE
P00698	LYZ	Lysozyme C	0.8728	0.24851	0.92903	0.68551	TRUE	FALSE	TRUE	FALSE	-0.271182	0.960151	0.534332	-0.162265	0.992845	0.738481	-0.980113	0.998195	0.122708	0.108916	0.993809	0.82253	-0.708931	1	0.256747	-0.817847	0.831838	0.218862	FALSE	FALSE	FALSE	FALSE	FALSE	FALSE
P61626	LYZ	Lysozyme C	0.42231	0.64972	0.69802	0.93977	FALSE	FALSE	FALSE	TRUE	-0.778984	0.90756	0.173603	-1.47727	0.970858	0.0271902	-2.81868	0.99275	0.00191912	-0.698287	0.98705	0.270899	-2.0397	1	0.0171851	-1.34141	0.749308	0.121188	FALSE	FALSE	FALSE	FALSE	FALSE	FALSE
Q9UPN3	MACF1	Microtubule-actin cross-linking factor 1, isoforms 1/2/3/4/5	0.96515	0.681	0.68551	0.68551	TRUE	FALSE	FALSE	FALSE	0.457652	0.929229	0.24873	1.31184	0.945744	0.00676384	-0.926367	0.998106	0.105119	0.854187	0.965473	0.0619371	-1.38402	1	0.0200821	-2.23821	0.0619339	0.00106936	FALSE	FALSE	FALSE	FALSE	FALSE	FALSE
O75367	MACROH2A1	Core histone macro-H2A.1	0.83675	0.66101	0.68551	0.68551	TRUE	FALSE	FALSE	FALSE	0.435046	0.941572	0.321518	-0.210417	0.992481	0.664497	-0.390627	0.998871	0.525682	-0.645462	0.983825	0.192836	-0.825672	1	0.188091	-0.18021	0.933884	0.781552	FALSE	FALSE	FALSE	FALSE	FALSE	FALSE
P20916	MAG	Myelin-associated glycoprotein	0.84977	0.92042	0.65186	0.993	TRUE	TRUE	FALSE	TRUE	-0.0520845	0.973612	0.909463	-0.0229662	0.993733	0.964223	-0.119695	0.999057	0.853438	0.0291183	0.994428	0.954649	-0.0676109	1	0.916866	-0.0967291	0.940166	0.888045	FALSE	FALSE	FALSE	FALSE	FALSE	FALSE
Q969L2	MAL2	Protein MAL2	0.88002	0.74287	0.87331	0.9876	TRUE	FALSE	TRUE	TRUE	0.50091	0.955982	0.468599	-0.656424	0.990543	0.39689	-0.347785	0.998993	0.720476	-1.15733	0.980333	0.143301	-0.848695	1	0.386735	0.30864	0.932747	0.764521	FALSE	FALSE	FALSE	FALSE	FALSE	FALSE
P21397	MAOA	Amine oxidase [flavin-containing] A	0.93095	0.84151	0.68551	0	TRUE	TRUE	FALSE	FALSE	2.03614	0.820421	0.0697575	3.44891	0.952621	0.009089	4.27572	0.996014	0.0103073	1.41278	0.986248	0.247088	2.23959	1	0.151096	0.826811	0.919915	0.608183	FALSE	FALSE	FALSE	FALSE	FALSE	FALSE
P27338	MAOB	Amine oxidase [flavin-containing] B	0.96828	0.73077	0.89616	0	TRUE	FALSE	TRUE	FALSE	-0.648927	0.934961	0.278559	0.246529	0.992704	0.708682	3.00901	0.99251	0.00176082	0.895456	0.983365	0.184761	3.65794	1	0.000301969	2.76248	0.209664	0.0052574	FALSE	FALSE	FALSE	FALSE	FALSE	FALSE
P78559	MAP1A	Microtubule-associated protein 1A	0.95902	0.8525	0.86166	0.94618	TRUE	TRUE	TRUE	TRUE	-0.661113	0.907447	0.173315	-0.349024	0.991536	0.511747	-0.426962	0.998871	0.525568	0.312089	0.991932	0.556937	0.234151	1	0.726709	-0.0779382	0.941438	0.912527	FALSE	FALSE	FALSE	FALSE	FALSE	FALSE
P46821	MAP1B	Microtubule-associated protein 1B	0.86734	0.85885	0.64985	0.96521	TRUE	TRUE	FALSE	TRUE	0.111039	0.968617	0.729445	-0.027273	0.993648	0.939337	0.143274	0.999009	0.752269	-0.138312	0.993083	0.700108	0.032235	1	0.943309	0.170547	0.92981	0.723251	FALSE	FALSE	FALSE	FALSE	FALSE	FALSE
Q9H492	MAP1LC3A	Microtubule-associated proteins 1A/1B light chain 3A	0.98704	0.85155	0.9753	0.68552	TRUE	TRUE	TRUE	FALSE	-0.568482	0.886292	0.131113	-1.70932	0.803032	0.000471117	-2.01354	0.990296	0.000904947	-1.14084	0.882646	0.0108436	-1.44506	1	0.0107521	-0.304221	0.916958	0.579595	FALSE	FALSE	FALSE	FALSE	FALSE	FALSE
A6NCE7;Q9GZQ8	MAP1LC3B	Microtubule-associated proteins 1A/1B light chain 3 beta 2;Microtubule-associated proteins 1A/1B light chain 3B	0.87416	0.40402	0.68551	0	TRUE	FALSE	FALSE	FALSE	NA	NA	NA	NA	NA	NA	NA	NA	NA	NA	NA	NA	NA	NA	NA	NA	NA	NA	NA	NA	NA	NA	NA	NA
P11137	MAP2	Microtubule-associated protein 2	0.99109	0.58248	0.82589	0.68551	TRUE	FALSE	TRUE	FALSE	0.341764	0.947206	0.368095	-0.463003	0.988999	0.277951	-0.504809	0.998702	0.347682	-0.804767	0.967454	0.0675523	-0.846573	1	0.123176	-0.0418057	0.942841	0.940821	FALSE	FALSE	FALSE	FALSE	FALSE	FALSE
Q02750	MAP2K1	Dual specificity mitogen-activated protein kinase kinase 1	0.95514	0.62785	0.68551	0	TRUE	FALSE	FALSE	FALSE	0.882132	0.94021	0.311763	2.03892	0.976548	0.0451767	2.78654	0.997246	0.0319136	1.15679	0.985904	0.237917	1.90441	1	0.129461	0.747615	0.915223	0.563845	FALSE	FALSE	FALSE	FALSE	FALSE	FALSE
P27816	MAP4	Microtubule-associated protein 4	0.96076	0.62072	0.68551	0.68551	TRUE	FALSE	FALSE	FALSE	0.312539	0.951544	0.412571	-0.163977	0.992654	0.698493	0.0893577	0.999063	0.86724	-0.476516	0.986947	0.267617	-0.223181	1	0.676929	0.253335	0.924358	0.655781	FALSE	FALSE	FALSE	FALSE	FALSE	FALSE
Q96JE9	MAP6	Microtubule-associated protein 6	0.84517	0.76032	0.9885	0.99351	TRUE	TRUE	TRUE	TRUE	-0.593159	0.921707	0.217164	-1.16887	0.974417	0.0368226	-0.992399	0.998296	0.147604	-0.575707	0.987372	0.281522	-0.399239	1	0.550395	0.176468	0.935238	0.802669	FALSE	FALSE	FALSE	FALSE	FALSE	FALSE
Q3KQU3	MAP7D1	MAP7 domain-containing protein 1	0.80463	0.67152	0	0	TRUE	FALSE	FALSE	FALSE	NA	NA	NA	NA	NA	NA	NA	NA	NA	NA	NA	NA	NA	NA	NA	NA	NA	NA	NA	NA	NA	NA	NA	NA
P28482	MAPK1	Mitogen-activated protein kinase 1	0.94081	0.87325	0.96285	0.90692	TRUE	TRUE	TRUE	TRUE	-0.672822	0.903098	0.162884	-0.256604	0.99227	0.625739	-0.181796	0.999025	0.784235	0.416218	0.990448	0.431364	0.491026	1	0.462523	0.0748083	0.94158	0.915328	FALSE	FALSE	FALSE	FALSE	FALSE	FALSE
P27361	MAPK3	Mitogen-activated protein kinase 3	0.8953	0.60767	0.68551	0	TRUE	FALSE	FALSE	FALSE	NA	NA	NA	NA	NA	NA	NA	NA	NA	NA	NA	NA	NA	NA	NA	NA	NA	NA	NA	NA	NA	NA	NA	NA
Q15691	MAPRE1	Microtubule-associated protein RP/EB family member 1	0.8129	0.56852	0.68551	0	TRUE	FALSE	FALSE	FALSE	NA	NA	NA	NA	NA	NA	NA	NA	NA	NA	NA	NA	NA	NA	NA	NA	NA	NA	NA	NA	NA	NA	NA	NA
Q15555	MAPRE2	Microtubule-associated protein RP/EB family member 2	0.87032	0.24951	0.68551	0	TRUE	FALSE	FALSE	FALSE	NA	NA	NA	NA	NA	NA	NA	NA	NA	NA	NA	NA	NA	NA	NA	NA	NA	NA	NA	NA	NA	NA	NA	NA
Q9UPY8	MAPRE3	Microtubule-associated protein RP/EB family member 3	0.92567	0.77489	0.90656	0	TRUE	TRUE	TRUE	FALSE	-0.295604	0.97213	0.848941	-0.3961	0.993196	0.819468	5.13324	0.997158	0.0289166	-0.100497	0.994424	0.953793	5.42885	1	0.0218001	5.52934	0.509479	0.0268048	FALSE	FALSE	FALSE	FALSE	FALSE	FALSE
P10636	MAPT	Microtubule-associated protein tau	0.92902	0.88137	0.97857	0.92231	TRUE	TRUE	TRUE	TRUE	-1.53372	0.39013	0.00705526	-1.28057	0.974111	0.035812	-0.557309	0.998805	0.445398	0.25315	0.992796	0.659307	0.976412	1	0.188407	0.723262	0.880152	0.352386	FALSE	FALSE	FALSE	FALSE	FALSE	FALSE
P29966	MARCKS	Myristoylated alanine-rich C-kinase substrate	0.915	0.66451	0.68551	0.68551	TRUE	FALSE	FALSE	FALSE	0.15486	0.968881	0.737414	-0.668101	0.987515	0.205282	-0.737045	0.998586	0.266753	-0.822961	0.97822	0.12284	-0.891905	1	0.182369	-0.0689438	0.941847	0.920618	FALSE	FALSE	FALSE	FALSE	FALSE	FALSE
P49006	MARCKSL1	MARCKS-related protein	0.86905	0.04511	0.68551	0	TRUE	FALSE	FALSE	FALSE	NA	NA	NA	NA	NA	NA	NA	NA	NA	NA	NA	NA	NA	NA	NA	NA	NA	NA	NA	NA	NA	NA	NA	NA
P31153	MAT2A	S-adenosylmethionine synthase isoform type-2	0.90033	0.71497	0.68551	0	TRUE	FALSE	FALSE	FALSE	0.0465516	0.974857	0.966077	1.61552	0.987307	0.197279	2.83026	0.997938	0.0800968	1.56897	0.9847	0.209911	2.78371	1	0.084774	1.21475	0.901805	0.462793	FALSE	FALSE	FALSE	FALSE	FALSE	FALSE
Q9NZL9	MAT2B	Methionine adenosyltransferase 2 subunit beta	0.71123	0.77425	0.95743	0.88442	FALSE	TRUE	TRUE	TRUE	-0.358159	0.961821	0.565241	-1.77804	0.965093	0.0179778	-1.814	0.997614	0.050175	-1.41988	0.961217	0.05226	-1.45584	1	0.109365	-0.035963	0.944179	0.96915	FALSE	FALSE	FALSE	FALSE	FALSE	FALSE
P02686	MBP	Myelin basic protein	0.81801	0.65565	0.98208	0.95697	TRUE	FALSE	TRUE	TRUE	-0.390434	0.960483	0.540257	-0.742935	0.989376	0.301994	-1.53861	0.998069	0.0988936	-0.352501	0.992493	0.620278	-1.14818	1	0.210536	-0.795676	0.89217	0.407447	FALSE	FALSE	FALSE	FALSE	FALSE	FALSE
P43121	MCAM	Cell surface glycoprotein MUC18	0.86285	0.64664	0.68551	0	TRUE	FALSE	FALSE	FALSE	-0.568458	0.962979	0.588531	1.42806	0.988128	0.231681	2.28604	0.998246	0.134596	1.99652	0.975115	0.100583	2.8545	1	0.0660943	0.857981	0.917667	0.586238	FALSE	FALSE	FALSE	FALSE	FALSE	FALSE
P40925	MDH1	Malate dehydrogenase, cytoplasmic	0.61393	0.82794	0.85377	0.9565	FALSE	TRUE	TRUE	TRUE	0.128756	0.969551	0.758317	0.492789	0.98933	0.298931	0.790623	0.99843	0.191627	0.364033	0.990568	0.43976	0.661868	1	0.27096	0.297834	0.922557	0.635764	FALSE	FALSE	FALSE	FALSE	FALSE	FALSE
P40926	MDH2	Malate dehydrogenase, mitochondrial	0.88596	0.76328	0.86779	0.93576	TRUE	TRUE	TRUE	TRUE	0.0548179	0.972727	0.872504	-0.0708314	0.993329	0.85288	0.255979	0.998921	0.597498	-0.125649	0.993355	0.742441	0.201161	1	0.677738	0.32681	0.910676	0.525793	FALSE	FALSE	FALSE	FALSE	FALSE	FALSE
P48163	ME1	NADP-dependent malic enzyme	0.97599	0.64142	0.83424	0.68551	TRUE	FALSE	TRUE	FALSE	0.142624	0.969709	0.7634	-0.283822	0.992078	0.593123	0.333302	0.998935	0.619663	-0.426447	0.990345	0.424395	0.190678	1	0.775946	0.617124	0.888579	0.389578	FALSE	FALSE	FALSE	FALSE	FALSE	FALSE
P51608	MECP2	Methyl-CpG-binding protein 2	0.80012	0.28777	0.68551	0	TRUE	FALSE	FALSE	FALSE	NA	NA	NA	NA	NA	NA	NA	NA	NA	NA	NA	NA	NA	NA	NA	NA	NA	NA	NA	NA	NA	NA	NA	NA
Q9H8H3	METTL7A	Putative methyltransferase-like protein 7A	0.9006	0.83634	0	0	TRUE	TRUE	FALSE	FALSE	NA	NA	NA	NA	NA	NA	NA	NA	NA	NA	NA	NA	NA	NA	NA	NA	NA	NA	NA	NA	NA	NA	NA	NA
O14880	MGST3	Microsomal glutathione S-transferase 3	0.94413	0.84323	0.68551	0	TRUE	TRUE	FALSE	FALSE	0.50086	0.961198	0.553368	2.82422	0.94626	0.0069051	3.54846	0.9955	0.00721988	2.32336	0.928961	0.021954	3.0476	1	0.0180758	0.724247	0.915644	0.567604	FALSE	FALSE	FALSE	FALSE	FALSE	FALSE
P14174	MIF	Macrophage migration inhibitory factor	0.90339	0.86465	0.91934	0.94809	TRUE	TRUE	TRUE	TRUE	-0.673374	0.941962	0.324402	-0.512087	0.991445	0.49954	-0.905839	0.998703	0.347945	0.161287	0.993851	0.830625	-0.232465	1	0.807475	-0.393752	0.927835	0.697538	FALSE	FALSE	FALSE	FALSE	FALSE	FALSE
Q8N4C8	MINK1	Misshapen-like kinase 1	0.91655	0.75529	0.68551	0	TRUE	TRUE	FALSE	FALSE	-0.47743	0.968177	0.716456	2.73109	0.981064	0.0751753	4.38375	0.997115	0.027593	3.20852	0.953011	0.0395773	4.86118	1	0.016	1.65266	0.891822	0.405659	FALSE	FALSE	FALSE	FALSE	FALSE	FALSE
Q15773	MLF2	Myeloid leukemia factor 2	0.86471	0.24501	0.68551	0	TRUE	FALSE	FALSE	FALSE	NA	NA	NA	NA	NA	NA	NA	NA	NA	NA	NA	NA	NA	NA	NA	NA	NA	NA	NA	NA	NA	NA	NA	NA
Q16653	MOG	Myelin-oligodendrocyte glycoprotein	0.8597	0.8595	0.90971	0.99387	TRUE	TRUE	TRUE	TRUE	-1.03411	0.516095	0.0144161	-0.654848	0.985486	0.142715	-1.18976	0.997456	0.0409283	0.379264	0.989734	0.386474	-0.155646	1	0.77668	-0.53491	0.882734	0.363133	FALSE	FALSE	FALSE	FALSE	FALSE	FALSE
P34949	MPI	Mannose-6-phosphate isomerase	0.92417	0.83457	0	0	TRUE	TRUE	FALSE	FALSE	NA	NA	NA	NA	NA	NA	NA	NA	NA	NA	NA	NA	NA	NA	NA	NA	NA	NA	NA	NA	NA	NA	NA	NA
P05164	MPO	Myeloperoxidase	0.8832	0.52004	0.88403	0.95842	TRUE	FALSE	TRUE	TRUE	-1.00755	0.811542	0.0651613	-2.00278	0.914588	0.00258725	-1.60826	0.997432	0.0397351	-0.995237	0.974988	0.0998196	-0.600713	1	0.418672	0.394524	0.920541	0.614537	FALSE	FALSE	FALSE	FALSE	FALSE	FALSE
P26038	MSN	Moesin	0.93554	0.86901	0.99206	0.05587	TRUE	TRUE	TRUE	FALSE	-0.753123	0.79665	0.0584745	-1.14886	0.959631	0.0129582	-0.95756	0.997984	0.0860142	-0.39574	0.989148	0.355068	-0.204437	1	0.702827	0.191303	0.930769	0.736319	FALSE	FALSE	FALSE	FALSE	FALSE	FALSE
P00403	MT-CO2	Cytochrome c oxidase subunit 2	0.87972	0.83883	0.92354	0.88676	TRUE	TRUE	TRUE	TRUE	-0.0937932	0.97216	0.850092	-0.570832	0.989498	0.310359	-0.902896	0.99847	0.20819	-0.477038	0.989872	0.394519	-0.809103	1	0.257351	-0.332065	0.9244	0.656268	FALSE	FALSE	FALSE	FALSE	FALSE	FALSE
Q9Y6C9	MTCH2	Mitochondrial carrier homolog 2	0.9326	0.61133	0.68551	0	TRUE	FALSE	FALSE	FALSE	1.42557	0.886677	0.131719	3.53092	0.913948	0.00254746	4.65729	0.99261	0.00182471	2.10535	0.960797	0.0514471	3.23172	1	0.0208541	1.12637	0.893894	0.416515	FALSE	FALSE	FALSE	FALSE	FALSE	FALSE
P11586	MTHFD1	C-1-tetrahydrofolate synthase, cytoplasmic	0.98245	0.66392	0.82834	0	TRUE	FALSE	TRUE	FALSE	0.718605	0.945763	0.355096	1.85912	0.975644	0.041325	3.77306	0.993334	0.00240228	1.14052	0.983917	0.194512	3.05445	1	0.0105174	1.91394	0.731726	0.1091	FALSE	FALSE	FALSE	FALSE	FALSE	FALSE
P58546	MTPN	Myotrophin	0.55429	0.82619	0.72833	0	FALSE	TRUE	FALSE	FALSE	1.11566	0.861541	0.100148	0.901392	0.988015	0.226478	2.25039	0.996966	0.0235967	-0.214265	0.993516	0.769391	1.13474	1	0.228615	1.349	0.807083	0.179397	FALSE	FALSE	FALSE	FALSE	FALSE	FALSE
Q9HC84	MUC5B	Mucin-5B	0.87447	0.08616	0.68551	0.68551	TRUE	FALSE	FALSE	FALSE	0.456677	0.949752	0.393133	0.413298	0.991356	0.487885	-0.703748	0.998709	0.353013	-0.0433795	0.994372	0.941568	-1.16043	1	0.133276	-1.11705	0.800441	0.170708	FALSE	FALSE	FALSE	FALSE	FALSE	FALSE
Q96DR8	MUCL1	Mucin-like protein 1	0.70438	0.74846	0.58881	0.96018	FALSE	FALSE	FALSE	TRUE	-0.159273	0.972597	0.86726	-1.88292	0.982409	0.0897299	-2.52864	0.997878	0.0730096	-1.72365	0.977634	0.11803	-2.36936	1	0.0912797	-0.645713	0.924048	0.652262	FALSE	FALSE	FALSE	FALSE	FALSE	FALSE
Q14764	MVP	Major vault protein	0.61285	0.8562	0.78256	0	FALSE	TRUE	TRUE	FALSE	-0.479601	0.960826	0.546467	1.00315	0.988779	0.265172	2.47452	0.997388	0.0376714	1.48275	0.976019	0.106309	2.95412	1	0.0153162	1.47136	0.834903	0.224704	FALSE	FALSE	FALSE	FALSE	FALSE	FALSE
Q96S97	MYADM	Myeloid-associated differentiation marker	0.92817	0.72879	0.83561	0	TRUE	FALSE	TRUE	FALSE	0.270086	0.968235	0.718154	2.05379	0.968375	0.0225219	3.21957	0.995274	0.00626683	1.78371	0.956269	0.0439028	2.94949	1	0.0110121	1.16578	0.867108	0.305301	FALSE	FALSE	FALSE	FALSE	FALSE	FALSE
P35580	MYH10	Myosin-10	0.9807	0.81292	0.8695	0.68551	TRUE	TRUE	TRUE	FALSE	0.0466523	0.973185	0.891331	-0.146038	0.992674	0.702586	0.180542	0.998987	0.708984	-0.19269	0.992449	0.61493	0.133889	1	0.781762	0.326579	0.910701	0.525986	FALSE	FALSE	FALSE	FALSE	FALSE	FALSE
Q7Z406	MYH14	Myosin-14	0.97597	0.49752	0.68551	0.99068	TRUE	FALSE	FALSE	TRUE	0.690125	0.872736	0.112431	0.486173	0.989449	0.306992	0.770231	0.998461	0.204381	-0.203953	0.992833	0.664453	0.0801059	1	0.892601	0.284058	0.924074	0.652558	FALSE	FALSE	FALSE	FALSE	FALSE	FALSE
Q9UKX2	MYH2	Myosin-2	0.54749	0.39076	0.68551	0.92248	FALSE	FALSE	FALSE	TRUE	-0.406963	0.958134	0.500677	-1.17279	0.982694	0.0933208	-2.12785	0.996821	0.020414	-0.765826	0.986779	0.262446	-1.72088	1	0.0545993	-0.955058	0.864274	0.296431	FALSE	FALSE	FALSE	FALSE	FALSE	FALSE
P35579	MYH9	Myosin-9	0.9308	0.74545	0.92537	0.94336	TRUE	FALSE	TRUE	TRUE	0.0471635	0.97294	0.881163	0.148959	0.992528	0.673472	0.151183	0.999001	0.735054	0.101796	0.993537	0.773078	0.10402	1	0.815732	0.00222408	0.945401	0.996249	FALSE	FALSE	FALSE	FALSE	FALSE	FALSE
O14950;P19105	MYL12A	Myosin regulatory light chain 12B;Myosin regulatory light chain 12A	0.74703	0.75417	0.83965	0.99387	FALSE	TRUE	TRUE	TRUE	NA	NA	NA	NA	NA	NA	NA	NA	NA	NA	NA	NA	NA	NA	NA	NA	NA	NA	NA	NA	NA	NA	NA	NA
P60660	MYL6	Myosin light polypeptide 6	0.84102	0.71643	0.92958	0.68551	TRUE	FALSE	TRUE	FALSE	0.776172	0.848767	0.0886626	0.823745	0.983503	0.104734	0.051003	0.999091	0.934297	0.0475724	0.994289	0.922519	-0.725169	1	0.249951	-0.772742	0.845874	0.247832	FALSE	FALSE	FALSE	FALSE	FALSE	FALSE
Q9Y4I1	MYO5A	Unconventional myosin-Va	0.99162	0.75497	0.83976	0	TRUE	TRUE	TRUE	FALSE	0.0530504	0.973888	0.92153	2.34535	0.858838	0.000925974	3.815	0.971155	7.63e-05	2.2923	0.49842	0.00113085	3.76195	1	8.89e-05	1.46966	0.680851	0.0814504	FALSE	FALSE	FALSE	FALSE	FALSE	FALSE
E9PAV3	NACA	Nascent polypeptide-associated complex subunit alpha, muscle-specific form	0.83006	0.29185	0	0	TRUE	FALSE	FALSE	FALSE	1.48195	0.482669	0.0125981	2.30067	0.874392	0.00117331	2.30067	0.995454	0.00701078	0.818724	0.983555	0.188034	0.818724	1	0.293662	2.22e-16	0.945566	1	FALSE	FALSE	FALSE	FALSE	FALSE	FALSE
Q4G0N4	NADK2	NAD kinase 2, mitochondrial	0.96169	0.70041	0	0	TRUE	FALSE	FALSE	FALSE	0.176349	0.972692	0.871092	3.44127	0.954766	0.0100649	3.44127	0.997339	0.0355456	3.26492	0.901226	0.0138085	3.26492	1	0.0448639	0	0.945566	1	FALSE	FALSE	FALSE	FALSE	FALSE	FALSE
Q13564	NAE1	NEDD8-activating enzyme E1 regulatory subunit	0.95298	0.89575	0	0	TRUE	TRUE	FALSE	FALSE	1.26464	0.859597	0.0982444	3.15081	0.868697	0.00107232	3.15081	0.995344	0.00653946	1.88616	0.945326	0.0318471	1.88616	1	0.0824513	0	0.945566	1	FALSE	FALSE	FALSE	FALSE	FALSE	FALSE
Q9UJ70	NAGK	N-acetyl-D-glucosamine kinase	0.93757	0.62916	0.83904	0.94407	TRUE	FALSE	TRUE	TRUE	0.0880512	0.97132	0.818604	-0.628819	0.985949	0.154351	0.265345	0.998939	0.625957	-0.71687	0.976162	0.107263	0.177294	1	0.74421	0.894164	0.763469	0.132445	FALSE	FALSE	FALSE	FALSE	FALSE	FALSE
Q99733	NAP1L4	Nucleosome assembly protein 1-like 4	0.90907	0.7243	0.83921	0	TRUE	FALSE	TRUE	FALSE	1.83912	0.87699	0.117781	2.26269	0.982213	0.087367	4.77943	0.995527	0.0073466	0.423569	0.993334	0.739047	2.94031	1	0.0797075	2.51674	0.783498	0.151303	FALSE	FALSE	FALSE	FALSE	FALSE	FALSE
P54920	NAPA	Alpha-soluble NSF attachment protein	0.98749	0.55518	0.68551	0	TRUE	FALSE	FALSE	FALSE	1.25978	0.891809	0.140285	3.14191	0.919026	0.00289093	4.38241	0.991619	0.00131367	1.88213	0.962054	0.053949	3.12262	1	0.0144846	1.2405	0.87285	0.324665	FALSE	FALSE	FALSE	FALSE	FALSE	FALSE
Q99747	NAPG	Gamma-soluble NSF attachment protein	0.96586	0.76578	0.68551	0	TRUE	TRUE	FALSE	FALSE	0.930328	0.917905	0.203739	2.95875	0.886656	0.00144613	3.84349	0.991183	0.00115327	2.02842	0.921709	0.0191407	2.91316	1	0.00909601	0.884747	0.893435	0.414071	FALSE	FALSE	FALSE	FALSE	FALSE	FALSE
O43776	NARS1	Asparagine--tRNA ligase, cytoplasmic	0.98306	0.8751	0.83862	0	TRUE	TRUE	TRUE	FALSE	-0.0117844	0.975322	0.988662	1.82103	0.979436	0.0617141	3.66508	0.994982	0.00527647	1.83281	0.964797	0.060202	3.67687	1	0.00515939	1.84405	0.782278	0.150039	FALSE	FALSE	FALSE	FALSE	FALSE	FALSE
Q8IW45	NAXD	ATP-dependent (S)-NAD(P)H-hydrate dehydratase	0.95035	0.7779	0.68551	0.68551	TRUE	TRUE	FALSE	FALSE	0.23068	0.967214	0.68938	0.555197	0.990507	0.393365	2.13515	0.996552	0.0159292	0.324517	0.992454	0.615478	1.90447	1	0.029	1.57995	0.678768	0.0799819	FALSE	FALSE	FALSE	FALSE	FALSE	FALSE
P61601	NCALD	Neurocalcin-delta	0.93585	0.93828	0.98812	0.98646	TRUE	TRUE	TRUE	TRUE	-0.264072	0.960069	0.532897	0.244582	0.992148	0.604825	0.8638	0.998333	0.158573	0.508655	0.98755	0.287734	1.12787	1	0.0707215	0.619218	0.875257	0.333393	FALSE	FALSE	FALSE	FALSE	FALSE	FALSE
P13591	NCAM1	Neural cell adhesion molecule 1	0.80598	0.95524	0.92833	0.95672	TRUE	TRUE	TRUE	TRUE	0.71177	0.703787	0.033476	0.964443	0.958326	0.0120706	1.70104	0.990898	0.00106364	0.252673	0.991028	0.474419	0.989265	1	0.0362674	0.736592	0.760215	0.129723	FALSE	FALSE	FALSE	FALSE	FALSE	FALSE
O15394	NCAM2	Neural cell adhesion molecule 2	0.88716	0.89914	0.98084	0.9905	TRUE	TRUE	TRUE	TRUE	-0.63834	0.82514	0.0724195	-0.622099	0.984046	0.113559	-0.450441	0.99871	0.353741	0.0162411	0.994474	0.965852	0.187899	1	0.695994	0.171658	0.930769	0.736318	FALSE	FALSE	FALSE	FALSE	FALSE	FALSE
O14594	NCAN	Neurocan core protein	0.97763	0.82891	0.98988	0.96806	TRUE	TRUE	TRUE	TRUE	-0.469204	0.932787	0.266553	-0.183751	0.992626	0.69272	0.401504	0.998849	0.496708	0.285453	0.99177	0.540543	0.870708	1	0.149735	0.585255	0.880303	0.352999	FALSE	FALSE	FALSE	FALSE	FALSE	FALSE
Q6ZVX7	NCCRP1	F-box only protein 50	0.55143	0.47489	0.68551	0.91277	FALSE	FALSE	FALSE	TRUE	-0.0652256	0.97365	0.911144	-0.592314	0.990255	0.370073	-1.61261	0.997781	0.0632685	-0.527088	0.990339	0.424005	-1.54738	1	0.073669	-1.02029	0.848183	0.253192	FALSE	FALSE	FALSE	FALSE	FALSE	FALSE
Q9UBB6	NCDN	Neurochondrin	0.95541	0.92581	0.93606	0.97456	TRUE	TRUE	TRUE	TRUE	-0.166258	0.966193	0.662517	-0.271282	0.991635	0.525399	0.998759	0.997901	0.0755876	-0.105024	0.993715	0.804875	1.16502	1	0.0411218	1.27004	0.564457	0.0363772	FALSE	FALSE	FALSE	FALSE	FALSE	FALSE
Q6PIU2	NCEH1	Neutral cholesterol ester hydrolase 1	0.98921	0.65817	0	0.68551	TRUE	FALSE	FALSE	FALSE	2.59908	0.153116	0.00163807	3.84812	0.618284	0.000114405	1.29668	0.998471	0.20872	1.24904	0.978972	0.129519	-1.30239	1	0.20681	-2.55143	0.506234	0.0263305	FALSE	FALSE	FALSE	FALSE	FALSE	FALSE
Q9Y2A7	NCKAP1	Nck-associated protein 1	0.90149	0.83784	0.77425	0	TRUE	TRUE	TRUE	FALSE	-0.434484	0.965866	0.654279	1.12978	0.989398	0.303503	3.21342	0.997142	0.0284022	1.56427	0.98169	0.159698	3.6479	1	0.0144787	2.08363	0.793704	0.162551	FALSE	FALSE	FALSE	FALSE	FALSE	FALSE
P19338	NCL	Nucleolin	0.90422	0.50588	0.68551	0.68551	TRUE	FALSE	FALSE	FALSE	0.596382	0.861176	0.0997855	0.558116	0.986284	0.163621	0.02174	0.999104	0.964829	-0.0382657	0.994286	0.921802	-0.574642	1	0.252562	-0.536376	0.869165	0.312014	FALSE	FALSE	FALSE	FALSE	FALSE	FALSE
Q92542	NCSTN	Nicastrin	0.87196	0.70749	0.87689	0.87908	TRUE	FALSE	TRUE	TRUE	0.00964372	0.975269	0.986072	-0.243647	0.992631	0.69385	0.705072	0.998731	0.372172	-0.253291	0.992962	0.682433	0.695428	1	0.378604	0.948719	0.85131	0.260755	FALSE	FALSE	FALSE	FALSE	FALSE	FALSE
Q92597	NDRG1	Protein NDRG1	0.41897	0.82216	0.83214	0.99404	FALSE	TRUE	TRUE	TRUE	0.0584108	0.972534	0.86478	-0.0297765	0.993643	0.93809	0.546678	0.998588	0.267859	-0.0881873	0.993786	0.818183	0.488267	1	0.320697	0.576454	0.855153	0.270568	FALSE	FALSE	FALSE	FALSE	FALSE	FALSE
Q9UGV2	NDRG3	Protein NDRG3	0.89849	0.9611	0.68551	0	TRUE	TRUE	FALSE	FALSE	-1.00542	0.932284	0.263902	2.37279	0.970035	0.0254956	3.34317	0.996422	0.0142453	3.3782	0.697494	0.00273627	4.34858	1	0.00238757	0.970383	0.902565	0.467683	FALSE	FALSE	FALSE	FALSE	FALSE	FALSE
Q9ULP0	NDRG4	Protein NDRG4	0.89416	0.3857	0.68551	0	TRUE	FALSE	FALSE	FALSE	NA	NA	NA	NA	NA	NA	NA	NA	NA	NA	NA	NA	NA	NA	NA	NA	NA	NA	NA	NA	NA	NA	NA	NA
O43678	NDUFA2	NADH dehydrogenase [ubiquinone] 1 alpha subcomplex subunit 2	0.9424	0.65975	0.96581	0.68552	TRUE	FALSE	TRUE	FALSE	0.391044	0.946736	0.363774	-0.530265	0.988919	0.27323	-0.718359	0.998541	0.241757	-0.921309	0.966638	0.0651375	-1.1094	1	0.0778662	-0.188094	0.933019	0.768537	FALSE	FALSE	FALSE	FALSE	FALSE	FALSE
O00483	NDUFA4	Cytochrome c oxidase subunit NDUFA4	0.91029	0.22263	0	0	TRUE	FALSE	FALSE	FALSE	2.21695	0.403244	0.00767286	3.10634	0.88588	0.00142613	3.10634	0.995683	0.00814895	0.88939	0.987784	0.296194	0.88939	1	0.406215	0	0.945566	1	FALSE	FALSE	FALSE	FALSE	FALSE	FALSE
Q16795	NDUFA9	NADH dehydrogenase [ubiquinone] 1 alpha subcomplex subunit 9, mitochondrial	0.85852	0.78789	0.26686	0	TRUE	TRUE	FALSE	FALSE	NA	NA	NA	NA	NA	NA	NA	NA	NA	NA	NA	NA	NA	NA	NA	NA	NA	NA	NA	NA	NA	NA	NA	NA
O96000	NDUFB10	NADH dehydrogenase [ubiquinone] 1 beta subcomplex subunit 10	0.84042	0.38055	0.68551	0	TRUE	FALSE	FALSE	FALSE	NA	NA	NA	NA	NA	NA	NA	NA	NA	NA	NA	NA	NA	NA	NA	NA	NA	NA	NA	NA	NA	NA	NA	NA
O95168	NDUFB4	NADH dehydrogenase [ubiquinone] 1 beta subcomplex subunit 4	0.89969	0.68246	0.8381	0	TRUE	FALSE	TRUE	FALSE	-0.0735865	0.974428	0.945942	1.01642	0.990643	0.406754	3.00875	0.997769	0.0621499	1.09001	0.989517	0.374321	3.08234	1	0.056583	1.99233	0.83779	0.230442	FALSE	FALSE	FALSE	FALSE	FALSE	FALSE
P28331	NDUFS1	NADH-ubiquinone oxidoreductase 75 kDa subunit, mitochondrial	0.99322	0.61224	0.92135	0.68551	TRUE	FALSE	TRUE	FALSE	0.00664965	0.975248	0.984997	0.0492884	0.99351	0.90081	-0.374838	0.998816	0.457061	0.0426388	0.994252	0.914131	-0.381487	1	0.449242	-0.424126	0.896	0.428059	FALSE	FALSE	FALSE	FALSE	FALSE	FALSE
O75489	NDUFS3	NADH dehydrogenase [ubiquinone] iron-sulfur protein 3, mitochondrial	0.98014	0.68148	0.8206	0	TRUE	FALSE	TRUE	FALSE	1.84957	0.662535	0.0272365	2.31477	0.962117	0.0149431	4.00412	0.992421	0.00170673	0.465199	0.992286	0.595578	2.15455	1	0.0632858	1.68935	0.792133	0.160737	FALSE	FALSE	FALSE	FALSE	FALSE	FALSE
O75251	NDUFS7	NADH dehydrogenase [ubiquinone] iron-sulfur protein 7, mitochondrial	0.89802	0.68551	0	0	TRUE	FALSE	FALSE	FALSE	NA	NA	NA	NA	NA	NA	NA	NA	NA	NA	NA	NA	NA	NA	NA	NA	NA	NA	NA	NA	NA	NA	NA	NA
O00217	NDUFS8	NADH dehydrogenase [ubiquinone] iron-sulfur protein 8, mitochondrial	0.96068	0.4807	0.68551	0	TRUE	FALSE	FALSE	FALSE	2.82906	0.147119	0.00156793	2.93798	0.918158	0.00282747	3.90965	0.992715	0.00189471	0.108918	0.994187	0.899632	1.08059	1	0.328955	0.971674	0.891915	0.406135	FALSE	FALSE	FALSE	FALSE	FALSE	FALSE
P49821	NDUFV1	NADH dehydrogenase [ubiquinone] flavoprotein 1, mitochondrial	0.99098	0.64654	0	0.68551	TRUE	FALSE	FALSE	FALSE	1.00105	0.922219	0.21909	2.96979	0.924217	0.0033204	0.072783	0.999097	0.948535	1.96875	0.95157	0.0378932	-0.928264	1	0.414748	-2.89701	0.49174	0.024344	FALSE	FALSE	FALSE	FALSE	FALSE	FALSE
Q15843	NEDD8	NEDD8	0.87255	0.89482	0.73283	0.95011	TRUE	TRUE	FALSE	TRUE	0.858746	0.951939	0.41708	1.04343	0.990349	0.378608	3.05679	0.997625	0.0509313	0.184681	0.994071	0.874851	2.19804	1	0.150031	2.01336	0.827238	0.210539	FALSE	FALSE	FALSE	FALSE	FALSE	FALSE
P12036	NEFH	Neurofilament heavy polypeptide	0.68089	0.28719	0.91569	0.86775	FALSE	FALSE	TRUE	TRUE	0.811004	0.929101	0.248131	0.0853437	0.99355	0.911809	-2.66011	0.996275	0.0126178	-0.725661	0.989089	0.352138	-3.47111	1	0.00197376	-2.74545	0.40211	0.0147955	FALSE	FALSE	FALSE	FALSE	FALSE	FALSE
P07196	NEFL	Neurofilament light polypeptide	0.61579	0.78917	0.87025	0.72391	FALSE	TRUE	TRUE	FALSE	1.02646	0.283695	0.00372835	0.816258	0.971799	0.0293384	1.06948	0.997009	0.0246416	-0.2102	0.991865	0.549992	0.0430214	1	0.922569	0.253222	0.918175	0.591085	FALSE	FALSE	FALSE	FALSE	FALSE	FALSE
P07197	NEFM	Neurofilament medium polypeptide	0.81356	0.79202	0.98889	0.98059	TRUE	TRUE	TRUE	TRUE	-0.180198	0.966382	0.667344	-0.294239	0.991677	0.531397	-0.607347	0.998655	0.31144	-0.114041	0.993729	0.80745	-0.427149	1	0.473337	-0.313108	0.920964	0.618886	FALSE	FALSE	FALSE	FALSE	FALSE	FALSE
Q7Z3B1	NEGR1	Neuronal growth regulator 1	0.79973	0.86497	0.92696	0.99392	TRUE	TRUE	TRUE	TRUE	-0.369225	0.942908	0.331602	-0.582724	0.986691	0.175973	-0.540628	0.99866	0.315243	-0.213498	0.992426	0.612132	-0.171402	1	0.74707	0.0420961	0.94282	0.940389	FALSE	FALSE	FALSE	FALSE	FALSE	FALSE
O94856	NFASC	Neurofascin	0.9151	0.92499	0.97117	0.984	TRUE	TRUE	TRUE	TRUE	-1.1612	0.313608	0.00445665	-0.510103	0.987832	0.218392	-0.0761355	0.99907	0.882074	0.651099	0.977986	0.120884	1.08507	1	0.0458074	0.433968	0.896218	0.429285	FALSE	FALSE	FALSE	FALSE	FALSE	FALSE
Q9GZT8	NIF3L1	NIF3-like protein 1	0.93442	0.9033	0.91747	0.68551	TRUE	TRUE	TRUE	FALSE	0.0668844	0.973371	0.899173	-0.121882	0.993265	0.836446	-0.530993	0.998835	0.479903	-0.188767	0.993397	0.749377	-0.597878	1	0.427215	-0.409111	0.919762	0.606643	FALSE	FALSE	FALSE	FALSE	FALSE	FALSE
Q9NQR4	NIT2	Omega-amidase NIT2	0.91161	0.82808	0.68551	0.68551	TRUE	TRUE	FALSE	FALSE	0.738755	0.886974	0.13219	0.939409	0.982403	0.0896529	0.731261	0.998615	0.284264	0.200655	0.993124	0.706186	-0.00749398	1	0.991101	-0.208148	0.933151	0.770504	FALSE	FALSE	FALSE	FALSE	FALSE	FALSE
P15531	NME1	Nucleoside diphosphate kinase A	0.92216	0.71103	0.94912	0.97784	TRUE	FALSE	TRUE	TRUE	0.672309	0.930372	0.254226	1.4883	0.97263	0.0314499	0.751349	0.998722	0.364343	0.815988	0.985042	0.217281	0.0790399	1	0.923099	-0.736948	0.89086	0.400773	FALSE	FALSE	FALSE	FALSE	FALSE	FALSE
O60361	NME2P1	Putative nucleoside diphosphate kinase	0.94936	0.42079	0.83959	0.68551	TRUE	FALSE	TRUE	FALSE	0.250254	0.965929	0.655856	0.495745	0.990888	0.432482	-0.124105	0.999067	0.875517	0.245491	0.993053	0.695607	-0.374359	1	0.637476	-0.61985	0.901986	0.463948	FALSE	FALSE	FALSE	FALSE	FALSE	FALSE
Q13423	NNT	NAD(P) transhydrogenase, mitochondrial	0.95559	0.86557	0.68551	0	TRUE	TRUE	FALSE	FALSE	1.32834	0.867942	0.106876	1.97899	0.97426	0.036298	2.74256	0.996955	0.0233178	0.650642	0.990932	0.466854	1.41422	1	0.217647	0.763579	0.910417	0.523754	FALSE	FALSE	FALSE	FALSE	FALSE	FALSE
P55786	NPEPPS	Puromycin-sensitive aminopeptidase	0.9505	0.86111	0.95543	0.97614	TRUE	TRUE	TRUE	TRUE	-0.101851	0.968615	0.729368	0.0670836	0.993272	0.838324	0.881725	0.997534	0.0452031	0.168934	0.992396	0.608495	0.983576	1	0.0273681	0.814641	0.674628	0.0771876	FALSE	FALSE	FALSE	FALSE	FALSE	FALSE
P06748	NPM1	Nucleophosmin	0.62775	0.67236	0.66166	0.98378	FALSE	FALSE	FALSE	TRUE	0.0277691	0.974551	0.951618	-0.361862	0.991313	0.482482	-0.841976	0.998459	0.203578	-0.389631	0.99071	0.450019	-0.869745	1	0.189717	-0.480114	0.90548	0.487277	FALSE	FALSE	FALSE	FALSE	FALSE	FALSE
Q9Y639	NPTN	Neuroplastin	0.92296	0.87224	0.98233	0.91321	TRUE	TRUE	TRUE	TRUE	-0.447569	0.959542	0.523775	-0.550789	0.99132	0.483367	-1.03157	0.998643	0.303269	-0.103221	0.994164	0.8948	-0.583999	1	0.556048	-0.480779	0.923586	0.647073	FALSE	FALSE	FALSE	FALSE	FALSE	FALSE
P15559	NQO1	NAD(P)H dehydrogenase [quinone] 1	0.91251	0.55824	0.68551	0	TRUE	FALSE	FALSE	FALSE	0.588824	0.962438	0.577445	1.77619	0.985502	0.143094	2.97912	0.997711	0.0573129	1.18736	0.988377	0.319643	2.39029	1	0.120654	1.20293	0.899699	0.449662	FALSE	FALSE	FALSE	FALSE	FALSE	FALSE
Q92823	NRCAM	Neuronal cell adhesion molecule	0.90283	0.88849	0.98792	0.9679	TRUE	TRUE	TRUE	TRUE	-0.327282	0.957758	0.494803	-0.0933166	0.993361	0.860941	1.2242	0.997951	0.0817521	0.233966	0.99281	0.661236	1.55148	1	0.0311879	1.31752	0.675439	0.0777229	FALSE	FALSE	FALSE	FALSE	FALSE	FALSE
Q92686	NRGN	Neurogranin	0.86209	0.26994	0.68551	0	TRUE	FALSE	FALSE	FALSE	NA	NA	NA	NA	NA	NA	NA	NA	NA	NA	NA	NA	NA	NA	NA	NA	NA	NA	NA	NA	NA	NA	NA	NA
Q9ULB1	NRXN1	Neurexin-1	0.97452	0.89513	0.68551	0	TRUE	TRUE	FALSE	FALSE	0.339455	0.956447	0.475226	2.36921	0.728441	0.000242275	3.08171	0.980825	0.000182268	2.02975	0.488173	0.00103613	2.74225	1	0.000572364	0.712501	0.871808	0.321004	FALSE	FALSE	FALSE	FALSE	FALSE	FALSE
Q9Y4C0	NRXN3	Neurexin-3	0.96855	0.92759	0.68551	0	TRUE	TRUE	FALSE	FALSE	0.7524	0.937793	0.295668	3.60132	0.711486	0.000212987	4.78275	0.977479	0.000128395	2.84892	0.612396	0.00182322	4.03035	1	0.000694098	1.18143	0.856567	0.274331	FALSE	FALSE	FALSE	FALSE	FALSE	FALSE
P46459	NSF	Vesicle-fusing ATPase	0.97498	0.85511	0.9765	0.98167	TRUE	TRUE	TRUE	TRUE	-0.225015	0.955268	0.458727	-0.0755247	0.99321	0.822749	0.242182	0.998904	0.571579	0.14949	0.992787	0.658137	0.467196	1	0.280862	0.317706	0.905172	0.485144	FALSE	FALSE	FALSE	FALSE	FALSE	FALSE
Q9UNZ2	NSFL1C	NSFL1 cofactor p47	0.92614	0.60189	0.68551	0	TRUE	FALSE	FALSE	FALSE	NA	NA	NA	NA	NA	NA	NA	NA	NA	NA	NA	NA	NA	NA	NA	NA	NA	NA	NA	NA	NA	NA	NA	NA
Q9P121	NTM	Neurotrimin	0.78043	0.83806	0.96752	0.93798	TRUE	TRUE	TRUE	TRUE	-0.680426	0.915849	0.19706	-0.486671	0.990603	0.402791	0.708621	0.998689	0.337029	0.193755	0.993321	0.736972	1.38905	1	0.0689836	1.19529	0.765379	0.134084	FALSE	FALSE	FALSE	FALSE	FALSE	FALSE
Q16620	NTRK2	BDNF/NT-3 growth factors receptor	0.98057	0.6739	0.80516	0	TRUE	FALSE	TRUE	FALSE	1.19151	0.891021	0.138908	1.70752	0.979556	0.0625803	3.71824	0.993896	0.00305322	0.516011	0.991925	0.556201	2.52673	1	0.0321157	2.01072	0.713823	0.0985312	FALSE	FALSE	FALSE	FALSE	FALSE	FALSE
Q9UKK9	NUDT5	ADP-sugar pyrophosphatase	0.57607	0.63851	0.99135	0.99172	FALSE	FALSE	TRUE	TRUE	-0.142498	0.969817	0.766915	-0.524037	0.989836	0.335322	-1.78372	0.99654	0.0157596	-0.381539	0.991101	0.480339	-1.64122	1	0.0246208	-1.25968	0.703225	0.092962	FALSE	FALSE	FALSE	FALSE	FALSE	FALSE
Q02218	OGDH	2-oxoglutarate dehydrogenase complex component E1	0.83437	0.39875	0	0	TRUE	FALSE	FALSE	FALSE	NA	NA	NA	NA	NA	NA	NA	NA	NA	NA	NA	NA	NA	NA	NA	NA	NA	NA	NA	NA	NA	NA	NA	NA
Q9NTK5	OLA1	Obg-like ATPase 1	0.98245	0.77211	0.91988	0.95852	TRUE	TRUE	TRUE	TRUE	0.049698	0.97343	0.901671	-0.202458	0.992422	0.653431	0.658129	0.998567	0.255875	-0.252156	0.992117	0.576606	0.608431	1	0.292286	0.860587	0.795877	0.165114	FALSE	FALSE	FALSE	FALSE	FALSE	FALSE
P23515	OMG	Oligodendrocyte-myelin glycoprotein	0.86413	0.88955	0.79393	0.99199	TRUE	TRUE	TRUE	TRUE	-0.392264	0.956298	0.473084	-0.198975	0.992868	0.74337	0.0580882	0.999094	0.939682	0.193289	0.993403	0.750436	0.450352	1	0.559295	0.257063	0.931921	0.752534	FALSE	FALSE	FALSE	FALSE	FALSE	FALSE
Q14982	OPCML	Opioid-binding protein/cell adhesion molecule	0.98571	0.84272	0.90287	0.68551	TRUE	TRUE	TRUE	FALSE	0.18625	0.966119	0.660641	0.459697	0.989863	0.337423	-0.413982	0.998845	0.491892	0.273447	0.99201	0.565023	-0.600232	1	0.322475	-0.873679	0.807247	0.179619	FALSE	FALSE	FALSE	FALSE	FALSE	FALSE
A6NCV1	OR6C74	Olfactory receptor 6C74	0.66666	0.76062	0.80324	0.68551	FALSE	TRUE	TRUE	FALSE	-0.100277	0.972007	0.844203	0.116701	0.993271	0.837921	-0.445329	0.998881	0.539095	0.216978	0.99311	0.704116	-0.345052	1	0.633439	-0.562031	0.902286	0.465876	FALSE	FALSE	FALSE	FALSE	FALSE	FALSE
P02763	ORM1	Alpha-1-acid glycoprotein 1	0.55475	0.66029	0.87945	0.97541	FALSE	FALSE	TRUE	TRUE	-0.632458	0.907322	0.173001	-0.267013	0.992112	0.598722	-0.514742	0.998786	0.424906	0.365444	0.991009	0.472876	0.117715	1	0.853982	-0.247729	0.929217	0.715374	FALSE	FALSE	FALSE	FALSE	FALSE	FALSE
P19652	ORM2	Alpha-1-acid glycoprotein 2	0.65843	0.65522	0.88905	0.98177	FALSE	FALSE	TRUE	TRUE	-0.286664	0.96685	0.679597	-0.664487	0.990529	0.395525	-1.57107	0.998187	0.121043	-0.377823	0.992545	0.626663	-1.28441	1	0.200037	-0.906585	0.888195	0.387742	FALSE	FALSE	FALSE	FALSE	FALSE	FALSE
Q96FW1	OTUB1	Ubiquitin thioesterase OTUB1	0.98538	0.78011	0.79138	0.68551	TRUE	TRUE	TRUE	FALSE	0.0221253	0.974765	0.961682	0.524495	0.989567	0.315262	0.185558	0.999021	0.775958	0.50237	0.98874	0.335553	0.163433	1	0.80203	-0.338937	0.921534	0.624838	FALSE	FALSE	FALSE	FALSE	FALSE	FALSE
P55809	OXCT1	Succinyl-CoA:3-ketoacid coenzyme A transferase 1, mitochondrial	0.98475	0.42558	0.68551	0.68551	TRUE	FALSE	FALSE	FALSE	0.115433	0.969945	0.771087	-0.2225	0.992218	0.616765	-0.272506	0.99894	0.62792	-0.337933	0.9907	0.449281	-0.387939	1	0.49168	-0.0500062	0.942459	0.932961	FALSE	FALSE	FALSE	FALSE	FALSE	FALSE
Q8N573	OXR1	Oxidation resistance protein 1	0.97638	0.71001	0.83324	0.95933	TRUE	FALSE	TRUE	TRUE	0.316347	0.960585	0.542092	0.0754068	0.993493	0.896067	0.8237	0.998587	0.267482	-0.24094	0.992924	0.677063	0.507353	1	0.489974	0.748293	0.877022	0.340044	FALSE	FALSE	FALSE	FALSE	FALSE	FALSE
Q99572	P2RX7	P2X purinoceptor 7	0.86871	0.82971	0	0	TRUE	TRUE	FALSE	FALSE	NA	NA	NA	NA	NA	NA	NA	NA	NA	NA	NA	NA	NA	NA	NA	NA	NA	NA	NA	NA	NA	NA	NA	NA
P07237	P4HB	Protein disulfide-isomerase	0.88957	0.86416	0.97643	0.99386	TRUE	TRUE	TRUE	TRUE	-0.252689	0.962016	0.569058	-0.939645	0.980435	0.0695111	-0.562045	0.998733	0.373625	-0.686957	0.982784	0.175364	-0.309357	1	0.621647	0.3776	0.915966	0.570506	FALSE	FALSE	FALSE	FALSE	FALSE	FALSE
Q9UQ80	PA2G4	Proliferation-associated protein 2G4	0.88206	0.4957	0.68551	0	TRUE	FALSE	FALSE	FALSE	-0.0134972	0.975373	0.991214	1.33882	0.989832	0.334938	2.90491	0.998113	0.106373	1.35231	0.988621	0.330215	2.91841	1	0.104871	1.5661	0.890518	0.399061	FALSE	FALSE	FALSE	FALSE	FALSE	FALSE
P11940	PABPC1	Polyadenylate-binding protein 1	0.94766	0.76099	0.96234	0.68551	TRUE	TRUE	TRUE	FALSE	-0.781568	0.884395	0.128192	-1.28722	0.972223	0.0303896	-2.44577	0.993312	0.00238125	-0.505652	0.989407	0.368412	-1.66421	1	0.0273228	-1.15856	0.763487	0.132461	FALSE	FALSE	FALSE	FALSE	FALSE	FALSE
Q9BY11	PACSIN1	Protein kinase C and casein kinase substrate in neurons protein 1	0.9757	0.66683	0.80671	0	TRUE	FALSE	TRUE	FALSE	0.555968	0.957968	0.49807	2.74696	0.945738	0.00676208	5.18349	0.983012	0.000238874	2.19099	0.935765	0.0253175	4.62752	1	0.000708977	2.43653	0.638852	0.0583904	FALSE	FALSE	FALSE	FALSE	FALSE	FALSE
Q9Y2J8	PADI2	Protein-arginine deiminase type-2	0.78328	0.89263	0.97154	0.88686	TRUE	TRUE	TRUE	TRUE	-0.715618	0.875251	0.115544	-0.487587	0.989728	0.327031	0.303809	0.998939	0.625717	0.228031	0.992674	0.643192	1.01943	1	0.113086	0.791396	0.841698	0.238594	FALSE	FALSE	FALSE	FALSE	FALSE	FALSE
P43034	PAFAH1B1	Platelet-activating factor acetylhydrolase IB subunit beta	0.97262	0.59449	0.68551	0	TRUE	FALSE	FALSE	FALSE	1.13552	0.916117	0.197908	3.21006	0.924101	0.00330978	4.47469	0.992106	0.00153436	2.07454	0.955151	0.0423293	3.33917	1	0.0123125	1.26463	0.875449	0.334106	FALSE	FALSE	FALSE	FALSE	FALSE	FALSE
P68402	PAFAH1B2	Platelet-activating factor acetylhydrolase IB subunit alpha2	0.97664	0.81795	0.83005	0	TRUE	TRUE	TRUE	FALSE	0.810588	0.933295	0.269277	3.03678	0.877852	0.00124182	4.92884	0.976062	0.000112688	2.22619	0.88942	0.0117867	4.11825	1	0.000670804	1.89206	0.703205	0.0929521	FALSE	FALSE	FALSE	FALSE	FALSE	FALSE
P22234	PAICS	Bifunctional phosphoribosylaminoimidazole carboxylase/phosphoribosylaminoimidazole succinocarboxamide synthetase	0.75139	0.72874	0.83778	0.68551	TRUE	FALSE	TRUE	FALSE	-0.704123	0.875001	0.115228	-0.568858	0.988447	0.247278	0.0497919	0.999092	0.934975	0.135264	0.993573	0.779424	0.753915	1	0.226255	0.61865	0.878365	0.345249	FALSE	FALSE	FALSE	FALSE	FALSE	FALSE
Q13153	PAK1	Serine/threonine-protein kinase PAK 1	0.85482	0.73183	0.96271	0.68551	TRUE	FALSE	TRUE	FALSE	-0.0441573	0.973845	0.919638	-0.221789	0.992411	0.651269	-0.419653	0.998852	0.500471	-0.177631	0.993195	0.717067	-0.375496	1	0.546097	-0.197865	0.932669	0.763382	FALSE	FALSE	FALSE	FALSE	FALSE	FALSE
O75781	PALM	Paralemmin-1	0.98719	0.76979	0.91173	0.68551	TRUE	TRUE	TRUE	FALSE	0.579038	0.928618	0.245878	-0.0614681	0.993546	0.910599	-0.327208	0.998946	0.637543	-0.640506	0.98638	0.250745	-0.906245	1	0.200922	-0.26574	0.929412	0.71794	FALSE	FALSE	FALSE	FALSE	FALSE	FALSE
Q99497	PARK7	Parkinson disease protein 7	0.78462	0.77483	0.59411	0.99173	TRUE	TRUE	FALSE	TRUE	0.206452	0.960915	0.54812	0.60041	0.98485	0.128655	0.0384408	0.999092	0.936659	0.393957	0.98814	0.309936	-0.168012	1	0.728759	-0.561969	0.85908	0.281231	FALSE	FALSE	FALSE	FALSE	FALSE	FALSE
Q96AQ6	PBXIP1	Pre-B-cell leukemia transcription factor-interacting protein 1	0.91713	0.52962	0	0	TRUE	FALSE	FALSE	FALSE	NA	NA	NA	NA	NA	NA	NA	NA	NA	NA	NA	NA	NA	NA	NA	NA	NA	NA	NA	NA	NA	NA	NA	NA
Q15365	PCBP1	Poly(rC)-binding protein 1	0.879	0.76522	0.96566	0.98994	TRUE	TRUE	TRUE	TRUE	0.0155638	0.975039	0.974785	0.0231825	0.993741	0.966411	1.12555	0.998175	0.118478	0.00761869	0.994568	0.988958	1.10998	1	0.123318	1.10236	0.779718	0.147441	FALSE	FALSE	FALSE	FALSE	FALSE	FALSE
Q15366	PCBP2	Poly(rC)-binding protein 2	0.91119	0.80911	0.92905	0.68551	TRUE	TRUE	TRUE	FALSE	0.440924	0.952444	0.422976	0.551386	0.990267	0.371204	0.564523	0.998825	0.467483	0.110462	0.993981	0.856292	0.1236	1	0.872713	0.0131379	0.944998	0.987185	FALSE	FALSE	FALSE	FALSE	FALSE	FALSE
P05165	PCCA	Propionyl-CoA carboxylase alpha chain, mitochondrial	0.83837	0.70018	0.82268	0.99403	TRUE	FALSE	TRUE	TRUE	-0.0528086	0.973334	0.897574	-0.691492	0.98552	0.143529	0.442724	0.998808	0.448976	-0.638683	0.982749	0.174824	0.495533	1	0.397703	1.13422	0.675584	0.0778191	FALSE	FALSE	FALSE	FALSE	FALSE	FALSE
P05166	PCCB	Propionyl-CoA carboxylase beta chain, mitochondrial	0.56232	0.62529	0.52562	0.98345	FALSE	FALSE	FALSE	TRUE	0.305212	0.940545	0.314112	0.771281	0.972419	0.030893	-0.73693	0.998038	0.0939286	0.466069	0.982713	0.174261	-1.04214	1	0.0222292	-1.50821	0.1551	0.00308615	FALSE	FALSE	FALSE	FALSE	FALSE	FALSE
Q08174	PCDH1	Protocadherin-1	0.97847	0.75912	0.92885	0.68551	TRUE	TRUE	TRUE	FALSE	0.410907	0.932494	0.265002	-0.29897	0.991161	0.46375	1.08022	0.997554	0.046359	-0.709877	0.973637	0.0922872	0.669314	1	0.201691	1.37919	0.44873	0.0190425	FALSE	FALSE	FALSE	FALSE	FALSE	FALSE
Q9HC56	PCDH9	Protocadherin-9	0.91672	0.71105	0.68551	0	TRUE	FALSE	FALSE	FALSE	-0.0922845	0.974114	0.931627	2.42658	0.978502	0.0555199	3.56981	0.997145	0.0284963	2.51886	0.958689	0.0476774	3.6621	1	0.0251051	1.14324	0.904657	0.481608	FALSE	FALSE	FALSE	FALSE	FALSE	FALSE
Q9UHG2	PCSK1N	ProSAAS	0.87202	0.69897	0.9514	0.83552	TRUE	FALSE	TRUE	TRUE	0.124834	0.972373	0.858402	-0.957058	0.988101	0.230435	-0.496786	0.998934	0.616727	-1.08189	0.982924	0.177556	-0.62162	1	0.531957	0.460272	0.924874	0.661711	FALSE	FALSE	FALSE	FALSE	FALSE	FALSE
Q9UHG3	PCYOX1	Prenylcysteine oxidase 1	0.97045	0.50052	0.68551	0	TRUE	FALSE	FALSE	FALSE	1.22435	0.861281	0.0998899	2.68666	0.922158	0.00313917	3.40899	0.993906	0.00306597	1.46232	0.971055	0.0803216	2.18464	1	0.0420124	0.722326	0.907801	0.503878	FALSE	FALSE	FALSE	FALSE	FALSE	FALSE
Q8WUM4	PDCD6IP	Programmed cell death 6-interacting protein	0.98579	0.86541	0.92871	0.68551	TRUE	TRUE	TRUE	FALSE	-0.0772097	0.970812	0.800497	-0.162027	0.992327	0.636034	-1.85075	0.986148	0.000381936	-0.0848176	0.993709	0.803899	-1.77354	1	0.000572131	-1.68872	0.0861501	0.00148319	FALSE	FALSE	FALSE	FALSE	FALSE	FALSE
P54750	PDE1A	Dual specificity calcium/calmodulin-dependent 3',5'-cyclic nucleotide phosphodiesterase 1A	0.94883	0.92537	0.68551	0	TRUE	TRUE	FALSE	FALSE	-0.213986	0.971306	0.818105	1.95308	0.980804	0.0727566	3.0135	0.997247	0.031947	2.16707	0.959257	0.0486439	3.22749	1	0.0227475	1.06042	0.899866	0.450686	FALSE	FALSE	FALSE	FALSE	FALSE	FALSE
P08559	PDHA1	Pyruvate dehydrogenase E1 component subunit alpha, somatic form, mitochondrial	0.94759	0.54568	0.68551	0	TRUE	FALSE	FALSE	FALSE	0.56596	0.963508	0.599715	2.89432	0.969774	0.0249911	4.12414	0.996315	0.0130354	2.32836	0.966534	0.0648398	3.55818	1	0.0287866	1.22982	0.89959	0.449004	FALSE	FALSE	FALSE	FALSE	FALSE	FALSE
P11177	PDHB	Pyruvate dehydrogenase E1 component subunit beta, mitochondrial	0.97741	0.65572	0.8393	0.68551	TRUE	FALSE	TRUE	FALSE	0.696595	0.829113	0.0747915	0.384623	0.990172	0.362798	-0.488285	0.998718	0.361093	-0.311973	0.990826	0.458647	-1.18488	1	0.0353601	-0.872908	0.762428	0.131565	FALSE	FALSE	FALSE	FALSE	FALSE	FALSE
P30101	PDIA3	Protein disulfide-isomerase A3	0.84284	0.84529	0.98284	0.9884	TRUE	TRUE	TRUE	TRUE	-0.359377	0.944897	0.347676	-0.584247	0.986749	0.177826	-0.273868	0.998929	0.609688	-0.22487	0.99229	0.59606	0.0855091	1	0.872938	0.310379	0.9176	0.585611	FALSE	FALSE	FALSE	FALSE	FALSE	FALSE
P13667	PDIA4	Protein disulfide-isomerase A4	0.86626	0.88765	0.68551	0	TRUE	TRUE	FALSE	FALSE	NA	NA	NA	NA	NA	NA	NA	NA	NA	NA	NA	NA	NA	NA	NA	NA	NA	NA	NA	NA	NA	NA	NA	NA
Q15084	PDIA6	Protein disulfide-isomerase A6	0.86783	0.85211	0.89472	0.68551	TRUE	TRUE	TRUE	FALSE	0.344996	0.954745	0.451719	0.329732	0.99159	0.519124	0.249822	0.998981	0.698306	-0.0152638	0.994516	0.976052	-0.095174	1	0.882395	-0.0799102	0.941144	0.906767	FALSE	FALSE	FALSE	FALSE	FALSE	FALSE
O00764	PDXK	Pyridoxal kinase	0.97249	0.78377	0.91832	0.68551	TRUE	TRUE	TRUE	FALSE	0.0241067	0.974338	0.941805	-1.19542	0.93142	0.00409739	-0.161711	0.998998	0.729559	-1.21952	0.744107	0.0035383	-0.185817	1	0.691341	1.03371	0.61149	0.0484214	FALSE	FALSE	FALSE	FALSE	FALSE	FALSE
Q96GD0	PDXP	Chronophin	0.96473	0.66982	0.68551	0	TRUE	FALSE	FALSE	FALSE	0.117146	0.972578	0.866499	2.39368	0.942283	0.00591892	3.17452	0.994579	0.00424309	2.27654	0.8576	0.00826113	3.05738	1	0.00553582	0.780842	0.901107	0.458372	FALSE	FALSE	FALSE	FALSE	FALSE	FALSE
Q15121	PEA15	Astrocytic phosphoprotein PEA-15	0.89944	0.83032	0.92649	0.68551	TRUE	TRUE	TRUE	FALSE	0.00946446	0.975087	0.97716	0.617135	0.983684	0.107572	1.07321	0.997241	0.0317043	0.607671	0.976934	0.112693	1.06375	1	0.0330553	0.456079	0.882778	0.36332	FALSE	FALSE	FALSE	FALSE	FALSE	FALSE
P30086	PEBP1	Phosphatidylethanolamine-binding protein 1	0.78663	0.81002	0.90259	0.97007	TRUE	TRUE	TRUE	TRUE	-0.237072	0.958253	0.502569	0.152264	0.992656	0.698915	-0.432982	0.998749	0.388549	0.389336	0.988575	0.328186	-0.19591	1	0.694022	-0.585246	0.85678	0.274905	FALSE	FALSE	FALSE	FALSE	FALSE	FALSE
P12955	PEPD	Xaa-Pro dipeptidase	0.79062	0.6804	0.90702	0.99298	TRUE	FALSE	TRUE	TRUE	-0.257748	0.960043	0.532432	0.182533	0.99262	0.691558	0.475478	0.998779	0.417214	0.440281	0.988914	0.343638	0.733226	1	0.216583	0.292945	0.922524	0.635402	FALSE	FALSE	FALSE	FALSE	FALSE	FALSE
Q9UHV9	PFDN2	Prefoldin subunit 2	0.92855	0.77443	0.82053	0	TRUE	TRUE	TRUE	FALSE	0.178703	0.972207	0.851921	1.55462	0.986077	0.15779	3.71475	0.996233	0.0122012	1.37592	0.984634	0.208536	3.53605	1	0.0162326	2.16013	0.776503	0.144273	FALSE	FALSE	FALSE	FALSE	FALSE	FALSE
P17858	PFKL	ATP-dependent 6-phosphofructokinase, liver type	0.98445	0.8057	0.95771	0.68551	TRUE	TRUE	TRUE	FALSE	0.223699	0.965406	0.64298	-0.445606	0.990693	0.411909	-0.542928	0.99879	0.428999	-0.669304	0.985299	0.223103	-0.766627	1	0.268169	-0.0973223	0.940415	0.892756	FALSE	FALSE	FALSE	FALSE	FALSE	FALSE
P08237	PFKM	ATP-dependent 6-phosphofructokinase, muscle type	0.99282	0.75541	0.82132	0.1451	TRUE	TRUE	TRUE	FALSE	0.371645	0.923359	0.223482	0.141363	0.992526	0.673109	0.235221	0.99891	0.579601	-0.230283	0.991261	0.493695	-0.136425	1	0.747289	0.0938579	0.937161	0.834309	FALSE	FALSE	FALSE	FALSE	FALSE	FALSE
Q01813	PFKP	ATP-dependent 6-phosphofructokinase, platelet type	0.98854	0.76698	0.68551	0	TRUE	TRUE	FALSE	FALSE	0.213405	0.967576	0.699347	2.80061	0.712738	0.000214978	3.6632	0.97918	0.000152163	2.58721	0.370873	0.00046848	3.4498	1	0.000280703	0.862589	0.866772	0.304225	FALSE	FALSE	FALSE	FALSE	FALSE	FALSE
P07737	PFN1	Profilin-1	0.73099	0.85226	0.95003	0.99379	FALSE	TRUE	TRUE	TRUE	-0.59764	0.881753	0.124305	0.053845	0.9935	0.8981	-0.113886	0.999047	0.830512	0.651485	0.979377	0.133379	0.483754	1	0.368418	-0.167731	0.932877	0.766438	FALSE	FALSE	FALSE	FALSE	FALSE	FALSE
P35080	PFN2	Profilin-2	0.70332	0.79422	0.87753	0.88786	FALSE	TRUE	TRUE	TRUE	-0.533257	0.941882	0.323807	-1.09633	0.981396	0.0784276	-0.328057	0.998962	0.664283	-0.563075	0.98906	0.350714	0.2052	1	0.785691	0.768275	0.877735	0.342792	FALSE	FALSE	FALSE	FALSE	FALSE	FALSE
P18669	PGAM1	Phosphoglycerate mutase 1	0.76701	0.74588	0.73138	0.99334	TRUE	FALSE	FALSE	TRUE	0.62832	0.877911	0.118997	0.686366	0.984775	0.127135	1.27176	0.997214	0.0307788	0.0580461	0.99416	0.893937	0.643444	1	0.251344	0.585397	0.872328	0.322822	FALSE	FALSE	FALSE	FALSE	FALSE	FALSE
P52209	PGD	6-phosphogluconate dehydrogenase, decarboxylating	0.95852	0.77008	0.79324	0.97883	TRUE	TRUE	TRUE	TRUE	-0.718078	0.808008	0.0634668	-0.163037	0.992626	0.692796	-0.0165985	0.999107	0.974578	0.555041	0.983579	0.18844	0.70148	1	0.188799	0.146438	0.934507	0.79116	FALSE	FALSE	FALSE	FALSE	FALSE	FALSE
P00558	PGK1	Phosphoglycerate kinase 1	0.44667	0.74295	0.79932	0.30682	FALSE	FALSE	TRUE	FALSE	-0.357711	0.937613	0.294526	0.0827532	0.993222	0.825754	0.0531474	0.999082	0.910955	0.440465	0.986347	0.249825	0.410859	1	0.392113	-0.0296058	0.943432	0.953157	FALSE	FALSE	FALSE	FALSE	FALSE	FALSE
O95336	PGLS	6-phosphogluconolactonase	0.93452	0.86025	0.90656	0.95717	TRUE	TRUE	TRUE	TRUE	-0.386485	0.946237	0.359283	0.0491157	0.993565	0.916034	0.231409	0.998979	0.695118	0.435601	0.989157	0.355498	0.617895	1	0.301593	0.182294	0.933169	0.770775	FALSE	FALSE	FALSE	FALSE	FALSE	FALSE
P36871	PGM1	Phosphoglucomutase-1	0.97801	0.59675	0.83899	0.68551	TRUE	FALSE	TRUE	FALSE	0.643464	0.900866	0.157941	-0.500317	0.989622	0.31918	-0.781622	0.998501	0.221869	-1.14378	0.944037	0.0308039	-1.42509	1	0.0330856	-0.281305	0.925819	0.672803	FALSE	FALSE	FALSE	FALSE	FALSE	FALSE
Q6PCE3	PGM2L1	Glucose 1,6-bisphosphate synthase	0.97456	0.75322	0.83977	0.68551	TRUE	TRUE	TRUE	FALSE	-0.251429	0.958131	0.500642	-0.276604	0.991504	0.507442	-0.288058	0.998913	0.584521	-0.0251745	0.994415	0.9516	-0.0366287	1	0.944339	-0.0114542	0.944836	0.983576	FALSE	FALSE	FALSE	FALSE	FALSE	FALSE
O15173	PGRMC2	Membrane-associated progesterone receptor component 2	0.80351	0.62716	0.68551	0	TRUE	FALSE	FALSE	FALSE	NA	NA	NA	NA	NA	NA	NA	NA	NA	NA	NA	NA	NA	NA	NA	NA	NA	NA	NA	NA	NA	NA	NA	NA
P35232	PHB1	Prohibitin 1	0.97022	0.68312	0.82889	0.97841	TRUE	FALSE	TRUE	TRUE	0.0666431	0.973265	0.894674	-0.524098	0.990108	0.357372	0.810709	0.99858	0.263109	-0.590742	0.987913	0.301068	0.744065	1	0.303063	1.33481	0.696567	0.0896915	FALSE	FALSE	FALSE	FALSE	FALSE	FALSE
Q99623	PHB2	Prohibitin-2	0.98818	0.63928	0.83013	0.68551	TRUE	FALSE	TRUE	FALSE	0.899948	0.791054	0.0562417	0.528046	0.989324	0.298522	0.727496	0.998572	0.258818	-0.371902	0.990852	0.460643	-0.172452	1	0.785416	0.19945	0.932888	0.7666	FALSE	FALSE	FALSE	FALSE	FALSE	FALSE
O43175	PHGDH	D-3-phosphoglycerate dehydrogenase	0.83907	0.84583	0.97168	0.89232	TRUE	TRUE	TRUE	TRUE	-1.18513	0.393972	0.00722902	-0.964998	0.975498	0.0407469	-0.198179	0.998995	0.724715	0.220136	0.992502	0.621325	0.986955	1	0.0916113	0.766818	0.825929	0.208262	FALSE	FALSE	FALSE	FALSE	FALSE	FALSE
Q92561	PHYHIP	Phytanoyl-CoA hydroxylase-interacting protein	0.90656	0.6486	0.68551	0.68551	TRUE	FALSE	FALSE	FALSE	0.677551	0.921358	0.215868	-0.0544139	0.993607	0.92762	-0.0576061	0.999093	0.939395	-0.731965	0.985634	0.231112	-0.735157	1	0.338136	-0.00319221	0.945426	0.99683	FALSE	FALSE	FALSE	FALSE	FALSE	FALSE
Q96FC7	PHYHIPL	Phytanoyl-CoA hydroxylase-interacting protein-like	0.90441	0.28497	0.68551	0	TRUE	FALSE	FALSE	FALSE	NA	NA	NA	NA	NA	NA	NA	NA	NA	NA	NA	NA	NA	NA	NA	NA	NA	NA	NA	NA	NA	NA	NA	NA
P01833	PIGR	Polymeric immunoglobulin receptor	0.37093	0.40969	0.33144	0.93991	FALSE	FALSE	FALSE	TRUE	0.753209	0.905044	0.167413	0.0184589	0.99377	0.975196	-1.56924	0.997583	0.0481662	-0.73475	0.9854	0.225473	-2.32245	1	0.00567198	-1.5877	0.638592	0.0582811	FALSE	FALSE	FALSE	FALSE	FALSE	FALSE
Q13526	PIN1	Peptidyl-prolyl cis-trans isomerase NIMA-interacting 1	0.96057	0.68575	0.68551	0	TRUE	FALSE	FALSE	FALSE	1.5658	0.652836	0.0260097	3.01483	0.81914	0.000560445	3.51662	0.9912	0.00115893	1.44903	0.964696	0.0599476	1.95082	1	0.0465956	0.501787	0.920175	0.610807	FALSE	FALSE	FALSE	FALSE	FALSE	FALSE
P12273	PIP	Prolactin-inducible protein	0.56369	0.70453	0.67375	0.7957	FALSE	FALSE	FALSE	TRUE	-0.026378	0.97486	0.966221	-1.22693	0.982493	0.090768	-3.88143	0.984446	0.000291957	-1.20055	0.97457	0.0973788	-3.85506	1	0.0003123	-2.6545	0.324076	0.00989316	FALSE	FALSE	FALSE	FALSE	FALSE	FALSE
P48426	PIP4K2A	Phosphatidylinositol 5-phosphate 4-kinase type-2 alpha	0.98015	0.90253	0.45815	0.68551	TRUE	TRUE	FALSE	FALSE	-0.518916	0.930125	0.253022	-1.06918	0.976059	0.0430323	-0.44658	0.998837	0.481653	-0.550261	0.987251	0.277441	0.0723354	1	0.908641	0.622597	0.881379	0.357426	FALSE	FALSE	FALSE	FALSE	FALSE	FALSE
P78356	PIP4K2B	Phosphatidylinositol 5-phosphate 4-kinase type-2 beta	0.81771	0.68551	0	0	TRUE	FALSE	FALSE	FALSE	NA	NA	NA	NA	NA	NA	NA	NA	NA	NA	NA	NA	NA	NA	NA	NA	NA	NA	NA	NA	NA	NA	NA	NA
Q9GZP4	PITHD1	PITH domain-containing protein 1	0.67666	0.74483	0.92648	0.9752	FALSE	FALSE	TRUE	TRUE	-0.967563	0.7441	0.0418094	-1.62254	0.931282	0.00408001	-1.2649	0.997718	0.0578819	-0.654972	0.984273	0.201278	-0.29734	1	0.63982	0.357632	0.918683	0.595986	FALSE	FALSE	FALSE	FALSE	FALSE	FALSE
P14618	PKM	Pyruvate kinase PKM	0.84775	0.86805	0.79385	0.99306	TRUE	TRUE	TRUE	TRUE	0.679225	0.611057	0.0215011	0.814017	0.961818	0.0146814	1.01255	0.996567	0.0161475	0.134793	0.992804	0.660495	0.333321	1	0.394091	0.198529	0.922008	0.629865	FALSE	FALSE	FALSE	FALSE	FALSE	FALSE
Q13835	PKP1	Plakophilin-1	0.54021	0.49821	0.44062	0.94797	FALSE	FALSE	FALSE	TRUE	-0.186524	0.967375	0.693786	-0.49469	0.990081	0.355091	-0.792434	0.998547	0.244887	-0.308166	0.991978	0.561698	-0.60591	1	0.37019	-0.297744	0.926029	0.67531	FALSE	FALSE	FALSE	FALSE	FALSE	FALSE
Q6P4A8	PLBD1	Phospholipase B-like 1	0.78328	0.37701	0.30741	0.98337	TRUE	FALSE	FALSE	TRUE	0.168496	0.964503	0.621763	-0.615785	0.984302	0.118084	-0.648139	0.998422	0.188875	-0.784281	0.96056	0.0509976	-0.816634	1	0.102417	-0.0323539	0.943257	0.949473	FALSE	FALSE	FALSE	FALSE	FALSE	FALSE
Q9NQ66	PLCB1	1-phosphatidylinositol 4,5-bisphosphate phosphodiesterase beta-1	0.79211	0.78556	0.82453	0	TRUE	TRUE	TRUE	FALSE	0.483368	0.949557	0.391105	2.17127	0.910837	0.00236676	3.81057	0.976114	0.000113217	1.6879	0.898369	0.0132672	3.3272	1	0.000446513	1.6393	0.647672	0.0622922	FALSE	FALSE	FALSE	FALSE	FALSE	FALSE
Q8IV08	PLD3	5'-3' exonuclease PLD3	0.92145	0.61437	0.92098	0.68551	TRUE	FALSE	TRUE	FALSE	0.413663	0.953619	0.437242	-0.181677	0.992937	0.75856	0.928099	0.998504	0.223539	-0.59534	0.988384	0.319952	0.514436	1	0.493691	1.10978	0.801725	0.172335	FALSE	FALSE	FALSE	FALSE	FALSE	FALSE
O60664	PLIN3	Perilipin-3	0.90239	0.72668	0.83631	0.68551	TRUE	FALSE	TRUE	FALSE	0.133743	0.969895	0.769442	-0.614016	0.988249	0.237434	-0.646012	0.998671	0.322887	-0.747759	0.981243	0.153953	-0.779756	1	0.23565	-0.0319964	0.943879	0.96267	FALSE	FALSE	FALSE	FALSE	FALSE	FALSE
P60201	PLP1	Myelin proteolipid protein	0.84695	0.79285	0.98497	0.94695	TRUE	TRUE	TRUE	TRUE	-0.297121	0.953912	0.440935	0.329395	0.990998	0.444728	0.433744	0.998788	0.426593	0.626517	0.981283	0.154453	0.730865	1	0.187271	0.104348	0.938394	0.855692	FALSE	FALSE	FALSE	FALSE	FALSE	FALSE
O14495	PLPP3	Phospholipid phosphatase 3	0.86547	0.72814	0.68551	0	TRUE	FALSE	FALSE	FALSE	NA	NA	NA	NA	NA	NA	NA	NA	NA	NA	NA	NA	NA	NA	NA	NA	NA	NA	NA	NA	NA	NA	NA	NA
P13797	PLS3	Plastin-3	0.98294	0.73845	0.68551	0.98697	TRUE	FALSE	FALSE	TRUE	-0.271196	0.958225	0.502119	0.0839818	0.993325	0.851668	-1.00121	0.998015	0.090531	0.355178	0.990469	0.432824	-0.730013	1	0.208706	-1.08519	0.684609	0.0842144	FALSE	FALSE	FALSE	FALSE	FALSE	FALSE
Q9UIW2	PLXNA1	Plexin-A1	0.98626	0.52509	0.68551	0.68551	TRUE	FALSE	FALSE	FALSE	0.765109	0.671684	0.0284685	-0.0540116	0.993441	0.882203	-0.417372	0.998729	0.370624	-0.819121	0.948785	0.0349699	-1.18248	1	0.0179771	-0.363361	0.90149	0.460785	FALSE	FALSE	FALSE	FALSE	FALSE	FALSE
Q9HCM2	PLXNA4	Plexin-A4	0.99072	0.88765	0.95577	0.99148	TRUE	TRUE	TRUE	TRUE	-0.0404702	0.9739	0.922058	0.370662	0.990836	0.426903	-0.139449	0.999038	0.811702	0.411132	0.989604	0.379145	-0.0989786	1	0.865671	-0.510111	0.893666	0.4153	FALSE	FALSE	FALSE	FALSE	FALSE	FALSE
O43157	PLXNB1	Plexin-B1	0.96149	0.7725	0.68551	0	TRUE	TRUE	FALSE	FALSE	0.0166372	0.975083	0.976948	1.84364	0.953359	0.00940831	2.72037	0.994034	0.0032511	1.827	0.875297	0.0099573	2.70374	1	0.00340415	0.876733	0.870613	0.316886	FALSE	FALSE	FALSE	FALSE	FALSE	FALSE
P02689	PMP2	Myelin P2 protein	0.87171	0.29517	0.68551	0	TRUE	FALSE	FALSE	FALSE	NA	NA	NA	NA	NA	NA	NA	NA	NA	NA	NA	NA	NA	NA	NA	NA	NA	NA	NA	NA	NA	NA	NA	NA
Q9NVS9	PNPO	Pyridoxine-5'-phosphate oxidase	0.89728	0.81046	0.83896	0.68551	TRUE	TRUE	TRUE	FALSE	-1.63181	0.458175	0.0113048	-1.43093	0.975334	0.0401163	-0.916977	0.998604	0.277305	0.200877	0.99346	0.759827	0.714833	1	0.394003	0.513956	0.914929	0.561246	FALSE	FALSE	FALSE	FALSE	FALSE	FALSE
Q8WVV4	POF1B	Protein POF1B	0.56224	0.61503	0.70132	0.99385	FALSE	FALSE	FALSE	TRUE	-0.659115	0.909418	0.178429	-1.26014	0.971083	0.0276822	-2.08155	0.995143	0.00579332	-0.601021	0.986973	0.268427	-1.42244	1	0.0465352	-0.821415	0.85096	0.259892	FALSE	FALSE	FALSE	FALSE	FALSE	FALSE
Q15165	PON2	Serum paraoxonase/arylesterase 2	0.89512	0.80026	0.68551	0	TRUE	TRUE	FALSE	FALSE	-0.58299	0.961777	0.564391	1.23629	0.989033	0.280019	2.39558	0.998105	0.1051	1.81928	0.977694	0.118512	2.97857	1	0.0479537	1.15928	0.899166	0.446442	FALSE	FALSE	FALSE	FALSE	FALSE	FALSE
P0CG38	POTEI	POTE ankyrin domain family member I	0.83141	0.77138	0.81165	0.97454	TRUE	TRUE	TRUE	TRUE	-0.388004	0.94093	0.316854	-0.276376	0.991597	0.520194	0.543385	0.998669	0.321452	0.111628	0.993656	0.794096	0.931389	1	0.0975086	0.819761	0.795084	0.164172	FALSE	FALSE	FALSE	FALSE	FALSE	FALSE
Q9BYX7	POTEKP	Putative beta-actin-like protein 3	0.85787	0.78581	0.8222	0	TRUE	TRUE	TRUE	FALSE	-1.64784	0.843988	0.084919	0.151172	0.993444	0.882783	1.64288	0.998486	0.215046	1.79901	0.973564	0.0919077	3.29071	1	0.0190569	1.4917	0.860688	0.285799	FALSE	FALSE	FALSE	FALSE	FALSE	FALSE
Q15181	PPA1	Inorganic pyrophosphatase	0.74359	0.74703	0.83971	0	FALSE	FALSE	TRUE	FALSE	0.365597	0.962874	0.586351	2.12271	0.954573	0.00997091	3.83467	0.988901	0.000649004	1.75711	0.940737	0.0283881	3.46907	1	0.00155856	1.71196	0.717724	0.100702	FALSE	FALSE	FALSE	FALSE	FALSE	FALSE
O75335	PPFIA4	Liprin-alpha-4	0.33683	0.56958	0.3485	0.86804	FALSE	FALSE	FALSE	TRUE	-0.995625	0.790726	0.056115	-0.93459	0.983434	0.103698	-0.409001	0.998897	0.560676	0.0610353	0.994243	0.912143	0.586624	1	0.406321	0.525589	0.904688	0.481821	FALSE	FALSE	FALSE	FALSE	FALSE	FALSE
P62937	PPIA	Peptidyl-prolyl cis-trans isomerase A	0.76417	0.83606	0.8531	0.99397	TRUE	TRUE	TRUE	TRUE	-0.247697	0.959235	0.518591	-0.494822	0.988588	0.254673	-0.460482	0.998759	0.39811	-0.247125	0.992001	0.564128	-0.212786	1	0.693899	0.0343393	0.943384	0.952148	FALSE	FALSE	FALSE	FALSE	FALSE	FALSE
P23284	PPIB	Peptidyl-prolyl cis-trans isomerase B	0.81851	0.8142	0.96617	0.68551	TRUE	TRUE	TRUE	FALSE	-0.523241	0.923618	0.224501	-1.13431	0.969909	0.0252496	0.0221893	0.999106	0.970332	-0.611066	0.984479	0.205356	0.54543	1	0.366132	1.1565	0.679101	0.080214	FALSE	FALSE	FALSE	FALSE	FALSE	FALSE
Q9ULR3	PPM1H	Protein phosphatase 1H	0.9803	0.52931	0.68551	0	TRUE	FALSE	FALSE	FALSE	1.96633	0.443947	0.010154	2.62955	0.919805	0.00294985	3.58462	0.992282	0.0016274	0.663221	0.989932	0.398127	1.61829	1	0.112206	0.955069	0.883206	0.365157	FALSE	FALSE	FALSE	FALSE	FALSE	FALSE
P62140	PPP1CB	Serine/threonine-protein phosphatase PP1-beta catalytic subunit	0.97525	0.66428	0.79873	0	TRUE	FALSE	TRUE	FALSE	1.60281	0.775701	0.0507638	2.32403	0.961221	0.0141787	4.32406	0.990027	0.000845144	0.721215	0.990137	0.410789	2.72125	1	0.0216942	2.00004	0.714207	0.0987418	FALSE	FALSE	FALSE	FALSE	FALSE	FALSE
Q9UD71	PPP1R1B	Protein phosphatase 1 regulatory subunit 1B	0.94937	0.74106	0	0.68551	TRUE	FALSE	FALSE	FALSE	0.865885	0.95182	0.415718	2.87219	0.969006	0.0235894	-0.00814457	0.999116	0.99564	2.00631	0.975232	0.101296	-0.874029	1	0.559516	-2.88034	0.680354	0.081096	FALSE	FALSE	FALSE	FALSE	FALSE	FALSE
Q15435	PPP1R7	Protein phosphatase 1 regulatory subunit 7	0.98932	0.81749	0.90164	0.68551	TRUE	TRUE	TRUE	FALSE	-0.0686139	0.972419	0.860204	-0.566828	0.987464	0.203266	0.259745	0.998947	0.638238	-0.498214	0.986732	0.261022	0.328359	1	0.553005	0.826573	0.798583	0.168396	FALSE	FALSE	FALSE	FALSE	FALSE	FALSE
P30153	PPP2R1A	Serine/threonine-protein phosphatase 2A 65 kDa regulatory subunit A alpha isoform	0.97614	0.58026	0.92862	0.68551	TRUE	FALSE	TRUE	FALSE	-0.134443	0.966992	0.683388	-0.298249	0.990786	0.421528	0.314497	0.998853	0.501645	-0.163806	0.992777	0.656852	0.44894	1	0.340618	0.612746	0.834468	0.223861	FALSE	FALSE	FALSE	FALSE	FALSE	FALSE
P63151	PPP2R2A	Serine/threonine-protein phosphatase 2A 55 kDa regulatory subunit B alpha isoform	0.96337	0.54684	0.68551	0	TRUE	FALSE	FALSE	FALSE	1.36457	0.845908	0.0863912	2.43116	0.954023	0.00970993	3.3711	0.994986	0.0052907	1.06659	0.985206	0.22098	2.00653	1	0.0755174	0.939936	0.893779	0.415903	FALSE	FALSE	FALSE	FALSE	FALSE	FALSE
Q08209	PPP3CA	Protein phosphatase 3 catalytic subunit alpha	0.95456	0.81176	0.98602	0.88549	TRUE	TRUE	TRUE	TRUE	-0.543741	0.910022	0.180047	-0.295042	0.991502	0.507119	0.374909	0.998856	0.505203	0.248698	0.992106	0.575387	0.91865	1	0.112923	0.669952	0.853763	0.26695	FALSE	FALSE	FALSE	FALSE	FALSE	FALSE
P16298	PPP3CB	Serine/threonine-protein phosphatase 2B catalytic subunit beta isoform	0.82568	0.88476	0.91516	0.93909	TRUE	TRUE	TRUE	TRUE	-0.127467	0.968648	0.730349	0.277309	0.991482	0.504407	1.50605	0.995827	0.00899812	0.404775	0.988688	0.333209	1.63352	1	0.00523688	1.22874	0.568004	0.0371244	FALSE	FALSE	FALSE	FALSE	FALSE	FALSE
P63098	PPP3R1	Calcineurin subunit B type 1	0.79304	0.83101	0.97693	0.68551	TRUE	TRUE	TRUE	FALSE	0.29809	0.958438	0.50552	0.301829	0.991777	0.546057	0.100025	0.999066	0.873734	0.00373956	0.994588	0.994002	-0.198065	1	0.753251	-0.201805	0.932619	0.762648	FALSE	FALSE	FALSE	FALSE	FALSE	FALSE
P53041	PPP5C	Serine/threonine-protein phosphatase 5	0.98491	0.66117	0.81645	0	TRUE	FALSE	TRUE	FALSE	1.66483	0.673516	0.0287247	1.69539	0.976294	0.0440456	3.40979	0.993771	0.00288796	0.0305621	0.994488	0.96931	1.74496	1	0.0951222	1.71439	0.747873	0.120128	FALSE	FALSE	FALSE	FALSE	FALSE	FALSE
P50897	PPT1	Palmitoyl-protein thioesterase 1	0.98191	0.80552	0.8202	0	TRUE	TRUE	TRUE	FALSE	0.423571	0.962223	0.573154	0.845706	0.989619	0.318975	2.94684	0.996125	0.0112083	0.422135	0.992451	0.615188	2.52327	1	0.026387	2.10113	0.669238	0.0737803	FALSE	FALSE	FALSE	FALSE	FALSE	FALSE
Q06830	PRDX1	Peroxiredoxin-1	0.88488	0.81596	0.87522	0.9887	TRUE	TRUE	TRUE	TRUE	0.221496	0.964667	0.625527	-0.0782565	0.993422	0.877066	-0.0731091	0.999081	0.909027	-0.299752	0.991917	0.555313	-0.294605	1	0.646111	0.00514741	0.945299	0.993947	FALSE	FALSE	FALSE	FALSE	FALSE	FALSE
P32119	PRDX2	Peroxiredoxin-2	0.63531	0.57001	0.72939	0.98797	FALSE	FALSE	FALSE	TRUE	0.624875	0.682719	0.0300613	0.632461	0.976947	0.0470483	0.287805	0.998812	0.453246	0.00758608	0.994531	0.979891	-0.33707	1	0.38111	-0.344656	0.890329	0.39812	FALSE	FALSE	FALSE	FALSE	FALSE	FALSE
P30048	PRDX3	Thioredoxin-dependent peroxide reductase, mitochondrial	0.80034	0.76522	0.99226	0.95698	TRUE	TRUE	TRUE	TRUE	0.585822	0.89521	0.1465	0.727703	0.983775	0.109021	1.1059	0.997718	0.0578375	0.141881	0.993378	0.746214	0.520083	1	0.353465	0.378202	0.910195	0.522012	FALSE	FALSE	FALSE	FALSE	FALSE	FALSE
P30044	PRDX5	Peroxiredoxin-5, mitochondrial	0.77371	0.86456	0.9901	0.86165	TRUE	TRUE	TRUE	TRUE	-0.0605229	0.973029	0.884833	0.00229176	0.99384	0.996085	0.220576	0.998987	0.709405	0.0628146	0.994156	0.893035	0.281099	1	0.635264	0.218284	0.930162	0.728005	FALSE	FALSE	FALSE	FALSE	FALSE	FALSE
P30041	PRDX6	Peroxiredoxin-6	0.85617	0.89942	0.76205	0.96132	TRUE	TRUE	TRUE	TRUE	0.756499	0.833452	0.0775309	1.04623	0.973028	0.032541	2.24766	0.990543	0.000965394	0.28973	0.991657	0.529552	1.49117	1	0.0177135	1.20144	0.649038	0.0629326	FALSE	FALSE	FALSE	FALSE	FALSE	FALSE
P48147	PREP	Prolyl endopeptidase	0.98505	0.72541	0.82184	0	TRUE	FALSE	TRUE	FALSE	1.22478	0.890628	0.138231	2.29882	0.965018	0.0178915	4.32733	0.991007	0.00109666	1.07404	0.985963	0.239454	3.10255	1	0.0123482	2.02851	0.72323	0.103888	FALSE	FALSE	FALSE	FALSE	FALSE	FALSE
Q4J6C6	PREPL	Prolyl endopeptidase-like	0.90794	0.85936	0.68551	0	TRUE	TRUE	FALSE	FALSE	0.918938	0.89948	0.154997	1.73146	0.968164	0.0221812	2.07865	0.997156	0.0288576	0.812526	0.986554	0.255752	1.15971	1	0.201876	0.347185	0.929031	0.712921	FALSE	FALSE	FALSE	FALSE	FALSE	FALSE
P22694	PRKACB	cAMP-dependent protein kinase catalytic subunit beta	0.98569	0.65542	0.89004	0.68551	TRUE	FALSE	TRUE	FALSE	0.573531	0.903965	0.164875	0.510476	0.988762	0.264209	1.45164	0.996711	0.018392	-0.0630559	0.994135	0.888397	0.878107	1	0.134421	0.941163	0.761299	0.130621	FALSE	FALSE	FALSE	FALSE	FALSE	FALSE
P10644	PRKAR1A	cAMP-dependent protein kinase type I-alpha regulatory subunit	0.46119	0.95112	0.68551	0	FALSE	TRUE	FALSE	FALSE	-0.781491	0.946913	0.365388	2.24939	0.971175	0.0278878	2.98441	0.996892	0.0218952	3.03088	0.788888	0.00470436	3.7659	1	0.00533458	0.735022	0.915649	0.567645	FALSE	FALSE	FALSE	FALSE	FALSE	FALSE
P13861	PRKAR2A	cAMP-dependent protein kinase type II-alpha regulatory subunit	0.90759	0.65484	0.82444	0	TRUE	FALSE	TRUE	FALSE	NA	NA	NA	NA	NA	NA	NA	NA	NA	NA	NA	NA	NA	NA	NA	NA	NA	NA	NA	NA	NA	NA	NA	NA
P31323	PRKAR2B	cAMP-dependent protein kinase type II-beta regulatory subunit	0.97677	0.73453	0.68551	0	TRUE	FALSE	FALSE	FALSE	0.75529	0.915101	0.194725	2.54558	0.84075	0.000725391	3.36707	0.987418	0.000479449	1.79029	0.879622	0.0104632	2.61177	1	0.00401349	0.821488	0.877463	0.34174	FALSE	FALSE	FALSE	FALSE	FALSE	FALSE
P17252	PRKCA	Protein kinase C alpha type	0.97363	0.85517	0	0	TRUE	TRUE	FALSE	FALSE	1.30596	0.685728	0.0305175	3.18878	0.531	6.93e-05	3.18878	0.989473	0.000738954	1.88282	0.843401	0.00722239	1.88282	1	0.0277956	0	0.945566	1	FALSE	FALSE	FALSE	FALSE	FALSE	FALSE
P05771	PRKCB	Protein kinase C beta type	0.96521	0.85883	0.77177	0	TRUE	TRUE	TRUE	FALSE	0.448134	0.954356	0.446627	1.96942	0.945603	0.00672572	3.41651	0.987997	0.000536766	1.52128	0.942365	0.0295371	2.96838	1	0.00183606	1.44709	0.734875	0.111129	FALSE	FALSE	FALSE	FALSE	FALSE	FALSE
P14314	PRKCSH	Glucosidase 2 subunit beta	0.90567	0.41303	0.68551	0	TRUE	FALSE	FALSE	FALSE	0.161216	0.973183	0.891236	1.45682	0.988982	0.276976	2.89878	0.998043	0.094705	1.2956	0.988661	0.331973	2.73756	1	0.113063	1.44196	0.894363	0.419042	FALSE	FALSE	FALSE	FALSE	FALSE	FALSE
P78527	PRKDC	DNA-dependent protein kinase catalytic subunit	0.88626	0.85748	0	0	TRUE	TRUE	FALSE	FALSE	NA	NA	NA	NA	NA	NA	NA	NA	NA	NA	NA	NA	NA	NA	NA	NA	NA	NA	NA	NA	NA	NA	NA	NA
P04156	PRNP	Major prion protein	0.9771	0.6807	0.95832	0.68551	TRUE	FALSE	TRUE	FALSE	-0.693445	0.907791	0.174189	-0.840707	0.985471	0.142358	-1.81298	0.996655	0.0174669	-0.147261	0.99364	0.791236	-1.11954	1	0.123647	-0.972277	0.82256	0.202581	FALSE	FALSE	FALSE	FALSE	FALSE	FALSE
Q9HWK6	prpL	Lysyl endopeptidase	0.38532	0.4976	0.55723	0.75298	FALSE	FALSE	FALSE	TRUE	-0.24787	0.964733	0.627048	-1.51853	0.961391	0.0143192	-2.54357	0.992974	0.0020864	-1.27066	0.949699	0.0358853	-2.2957	1	0.00453619	-1.02504	0.814303	0.189658	FALSE	FALSE	FALSE	FALSE	FALSE	FALSE
P60891	PRPS1	Ribose-phosphate pyrophosphokinase 1	0.87919	0.82657	0.7816	0.95691	TRUE	TRUE	TRUE	TRUE	0.136018	0.970937	0.804876	0.406792	0.99153	0.510937	0.0345756	0.999104	0.964552	0.270774	0.992805	0.660621	-0.101442	1	0.896281	-0.372216	0.924101	0.65286	FALSE	FALSE	FALSE	FALSE	FALSE	FALSE
Q7Z6L0	PRRT2	Proline-rich transmembrane protein 2	0.87691	0.65934	0.91184	0.83347	TRUE	FALSE	TRUE	TRUE	0.942984	0.883175	0.126371	0.200329	0.992962	0.764257	0.374305	0.998959	0.658253	-0.742654	0.987139	0.27376	-0.568679	1	0.503095	0.173975	0.937839	0.845968	FALSE	FALSE	FALSE	FALSE	FALSE	FALSE
P24158	PRTN3	Myeloblastin	0.80047	0.03699	0.81498	0	TRUE	FALSE	TRUE	FALSE	NA	NA	NA	NA	NA	NA	NA	NA	NA	NA	NA	NA	NA	NA	NA	NA	NA	NA	NA	NA	NA	NA	NA	NA
P07602	PSAP	Prosaposin	0.78091	0.68671	0.97922	0.98981	TRUE	FALSE	TRUE	TRUE	-0.390052	0.950997	0.406466	-0.512371	0.989782	0.331149	-0.982111	0.998295	0.147461	-0.122318	0.993765	0.814258	-0.592059	1	0.373629	-0.46974	0.907769	0.503642	FALSE	FALSE	FALSE	FALSE	FALSE	FALSE
Q6NUJ1	PSAPL1	Proactivator polypeptide-like 1	0.58671	0.46984	0.56101	0.91989	FALSE	FALSE	FALSE	TRUE	-0.415679	0.951956	0.417272	-0.821491	0.986135	0.15941	-1.31966	0.997927	0.0786589	-0.405812	0.99107	0.477796	-0.903985	1	0.217876	-0.498173	0.909355	0.515527	FALSE	FALSE	FALSE	FALSE	FALSE	FALSE
Q9Y617	PSAT1	Phosphoserine aminotransferase	0.85339	0.82551	0.75513	0.93499	TRUE	TRUE	TRUE	TRUE	-0.072972	0.972338	0.85701	0.625023	0.986764	0.178328	1.63872	0.995894	0.009441	0.697995	0.979559	0.135171	1.71169	1	0.00712672	1.01369	0.729387	0.107627	FALSE	FALSE	FALSE	FALSE	FALSE	FALSE
Q9NYI0	PSD3	PH and SEC7 domain-containing protein 3	0.91683	0.95195	0.68551	0	TRUE	TRUE	FALSE	FALSE	NA	NA	NA	NA	NA	NA	NA	NA	NA	NA	NA	NA	NA	NA	NA	NA	NA	NA	NA	NA	NA	NA	NA	NA
P25786	PSMA1	Proteasome subunit alpha type-1	0.88436	0.7517	0.74794	0.43448	TRUE	TRUE	FALSE	FALSE	-0.424501	0.951544	0.412574	-0.468108	0.990761	0.418884	-0.893226	0.998513	0.227956	-0.043607	0.994363	0.939423	-0.468726	1	0.520811	-0.425119	0.917257	0.582383	FALSE	FALSE	FALSE	FALSE	FALSE	FALSE
P25787	PSMA2	Proteasome subunit alpha type-2	0.7	0.78865	0.64218	0.4435	FALSE	TRUE	FALSE	FALSE	0.387343	0.952807	0.427291	0.02377	0.993736	0.964936	-0.312139	0.998953	0.649067	-0.363573	0.99138	0.504011	-0.699481	1	0.313392	-0.335909	0.923338	0.644321	FALSE	FALSE	FALSE	FALSE	FALSE	FALSE
P25788	PSMA3	Proteasome subunit alpha type-3	0.83776	0.70529	0.75302	0.90375	TRUE	FALSE	TRUE	TRUE	-0.346387	0.951291	0.409726	0.367849	0.990894	0.433185	-0.916982	0.998233	0.131454	0.714236	0.979729	0.136892	-0.570595	1	0.338558	-1.28483	0.620166	0.0512805	FALSE	FALSE	FALSE	FALSE	FALSE	FALSE
P25789	PSMA4	Proteasome subunit alpha type-4	0.89342	0.49774	0.68551	0.81495	TRUE	FALSE	FALSE	TRUE	0.15396	0.972743	0.873147	0.473058	0.992466	0.66156	1.25609	0.99872	0.362469	0.319097	0.993504	0.767443	1.10213	1	0.42303	0.783028	0.918026	0.589659	FALSE	FALSE	FALSE	FALSE	FALSE	FALSE
P28066	PSMA5	Proteasome subunit alpha type-5	0.66661	0.75908	0.81008	0.9753	FALSE	TRUE	TRUE	TRUE	0.480948	0.90619	0.170185	0.10301	0.993063	0.787468	-0.0364251	0.999094	0.939866	-0.377938	0.988585	0.328626	-0.517373	1	0.291497	-0.139435	0.93415	0.785622	FALSE	FALSE	FALSE	FALSE	FALSE	FALSE
P60900	PSMA6	Proteasome subunit alpha type-6	0.77139	0.73592	0.89341	0.9483	TRUE	FALSE	TRUE	TRUE	-0.988437	0.612108	0.0216013	-0.156761	0.992785	0.72555	-1.29252	0.997247	0.0319204	0.831676	0.969576	0.0746134	-0.304086	1	0.591197	-1.13576	0.662755	0.0699926	FALSE	FALSE	FALSE	FALSE	FALSE	FALSE
O14818	PSMA7	Proteasome subunit alpha type-7	0.69644	0.79475	0.59564	0.49746	FALSE	TRUE	FALSE	FALSE	-0.0864209	0.971892	0.839825	0.0899426	0.993321	0.85075	-0.385277	0.998872	0.526137	0.176363	0.993165	0.712551	-0.298856	1	0.622135	-0.475219	0.901664	0.461895	FALSE	FALSE	FALSE	FALSE	FALSE	FALSE
P20618	PSMB1	Proteasome subunit beta type-1	0.72643	0.68516	0.63841	0.98995	FALSE	FALSE	FALSE	TRUE	0.443252	0.939675	0.308075	-0.533717	0.988923	0.27342	-0.284678	0.998948	0.639572	-0.976969	0.961715	0.0532531	-0.72793	1	0.23889	0.249039	0.927954	0.699037	FALSE	FALSE	FALSE	FALSE	FALSE	FALSE
P49721	PSMB2	Proteasome subunit beta type-2	0.75677	0.72952	0.58389	0.99372	TRUE	FALSE	FALSE	TRUE	0.13057	0.971931	0.841296	0.250842	0.992811	0.731079	1.05066	0.998579	0.262761	0.120273	0.994042	0.868942	0.92009	1	0.324774	0.799817	0.894094	0.417589	FALSE	FALSE	FALSE	FALSE	FALSE	FALSE
P49720	PSMB3	Proteasome subunit beta type-3	0.50783	0.70854	0.76975	0.98773	FALSE	FALSE	TRUE	TRUE	0.31844	0.939694	0.308202	0.5569	0.98431	0.118227	0.395461	0.998728	0.369303	0.23846	0.991235	0.491452	0.0770212	1	0.859681	-0.161439	0.9301	0.727163	FALSE	FALSE	FALSE	FALSE	FALSE	FALSE
P28070	PSMB4	Proteasome subunit beta type-4	0.66328	0.5515	0.68551	0.99303	FALSE	FALSE	FALSE	TRUE	0.553255	0.934209	0.2743	0.894963	0.984413	0.120111	1.20483	0.998073	0.0995255	0.341708	0.991777	0.541197	0.651572	1	0.360174	0.309864	0.926316	0.678761	FALSE	FALSE	FALSE	FALSE	FALSE	FALSE
P28074	PSMB5	Proteasome subunit beta type-5	0.68524	0.62338	0.79519	0.98526	FALSE	FALSE	TRUE	TRUE	-0.407469	0.937001	0.290703	-1.58856	0.88099	0.00130934	-0.811569	0.998277	0.142587	-1.18109	0.885591	0.0112372	-0.404099	1	0.455163	0.776994	0.809898	0.18329	FALSE	FALSE	FALSE	FALSE	FALSE	FALSE
P28072	PSMB6	Proteasome subunit beta type-6	0.87226	0.43328	0.78832	0.88528	TRUE	FALSE	TRUE	TRUE	-0.0434224	0.974671	0.957233	-0.584572	0.991602	0.520874	-1.35381	0.998549	0.246072	-0.54115	0.991884	0.551976	-1.31038	1	0.260991	-0.769234	0.911057	0.528815	FALSE	FALSE	FALSE	FALSE	FALSE	FALSE
Q99436	PSMB7	Proteasome subunit beta type-7	0.83194	0.54482	0.68551	0.97946	TRUE	FALSE	FALSE	TRUE	0.0625862	0.97361	0.909409	-0.144118	0.993177	0.81482	-0.331053	0.998966	0.671142	-0.206704	0.993322	0.737134	-0.393639	1	0.614035	-0.186935	0.936358	0.820853	FALSE	FALSE	FALSE	FALSE	FALSE	FALSE
P35998	PSMC2	26S proteasome regulatory subunit 7	0.85531	0.68551	0	0	TRUE	FALSE	FALSE	FALSE	NA	NA	NA	NA	NA	NA	NA	NA	NA	NA	NA	NA	NA	NA	NA	NA	NA	NA	NA	NA	NA	NA	NA	NA
P17980	PSMC3	26S proteasome regulatory subunit 6A	0.98931	0.55874	0.8241	0.68551	TRUE	FALSE	TRUE	FALSE	0.391072	0.951719	0.414562	0.0345542	0.993678	0.948106	0.128158	0.999055	0.84872	-0.356518	0.991386	0.504546	-0.262914	1	0.696031	0.0936038	0.940558	0.895468	FALSE	FALSE	FALSE	FALSE	FALSE	FALSE
P62333	PSMC6	26S proteasome regulatory subunit 10B	0.98524	0.7745	0.68551	0.68551	TRUE	TRUE	FALSE	FALSE	0.343009	0.948783	0.383261	0.174025	0.992611	0.689867	-0.306419	0.998909	0.579371	-0.168984	0.993071	0.698367	-0.649428	1	0.246987	-0.480444	0.893594	0.414916	FALSE	FALSE	FALSE	FALSE	FALSE	FALSE
Q99460	PSMD1	26S proteasome non-ATPase regulatory subunit 1	0.95777	0.89217	0.68551	0	TRUE	TRUE	FALSE	FALSE	1.43867	0.868509	0.107509	3.15144	0.928898	0.0037966	4.05756	0.994085	0.0033285	1.71277	0.972785	0.0880186	2.61889	1	0.0427046	0.906125	0.905317	0.48615	FALSE	FALSE	FALSE	FALSE	FALSE	FALSE
O00231	PSMD11	26S proteasome non-ATPase regulatory subunit 11	0.95329	0.70092	0.68551	0	TRUE	FALSE	FALSE	FALSE	0.574963	0.959906	0.530043	2.7212	0.961328	0.014267	2.7212	0.997547	0.0459521	2.14624	0.957916	0.0464121	2.14624	1	0.108164	0	0.945566	1	FALSE	FALSE	FALSE	FALSE	FALSE	FALSE
Q13200	PSMD2	26S proteasome non-ATPase regulatory subunit 2	0.83192	0.83399	0.79195	0.68551	TRUE	TRUE	TRUE	FALSE	-0.0642466	0.973604	0.909131	-0.712443	0.988792	0.265895	-0.520664	0.998864	0.515515	-0.648197	0.988142	0.309999	-0.456418	1	0.568124	0.191779	0.936332	0.820417	FALSE	FALSE	FALSE	FALSE	FALSE	FALSE
Q15008	PSMD6	26S proteasome non-ATPase regulatory subunit 6	0.98358	0.80897	0.90438	0	TRUE	TRUE	TRUE	FALSE	1.91304	0.508118	0.0139576	1.20149	0.985528	0.143711	3.8529	0.991007	0.0010967	-0.711546	0.989572	0.37732	1.93986	1	0.0667221	2.65141	0.470795	0.0215972	FALSE	FALSE	FALSE	FALSE	FALSE	FALSE
P51665	PSMD7	26S proteasome non-ATPase regulatory subunit 7	0.94251	0.77145	0	0	TRUE	TRUE	FALSE	FALSE	1.41579	0.317917	0.00457393	2.21039	0.738725	0.000262819	2.21039	0.993074	0.00216762	0.794598	0.978099	0.121819	0.794598	1	0.21559	0	0.945566	1	FALSE	FALSE	FALSE	FALSE	FALSE	FALSE
Q06323	PSME1	Proteasome activator complex subunit 1	0.97402	0.7721	0.68551	0	TRUE	TRUE	FALSE	FALSE	1.09129	0.326688	0.0048239	2.47075	0.187922	3.96e-06	2.47075	0.969326	6.72e-05	1.37945	0.621696	0.00190059	1.37945	1	0.0101572	0	0.945566	1	FALSE	FALSE	FALSE	FALSE	FALSE	FALSE
P26599	PTBP1	Polypyrimidine tract-binding protein 1	0.86676	0.74171	0.68551	0.68551	TRUE	FALSE	FALSE	FALSE	0.37495	0.962307	0.574829	-0.28585	0.992669	0.701415	-1.17891	0.998497	0.220101	-0.6608	0.989614	0.379655	-1.55386	1	0.111272	-0.893057	0.885717	0.376246	FALSE	FALSE	FALSE	FALSE	FALSE	FALSE
P41222	PTGDS	Prostaglandin-H2 D-isomerase	0.86016	0.86943	0.97994	0.99306	TRUE	TRUE	TRUE	TRUE	-1.16223	0.631114	0.023523	-0.76876	0.986179	0.160625	-0.618707	0.998722	0.364218	0.393474	0.990891	0.463633	0.543527	1	0.424178	0.150053	0.937133	0.833845	FALSE	FALSE	FALSE	FALSE	FALSE	FALSE
Q15185	PTGES3	Prostaglandin E synthase 3	0.82847	0.58293	0.83771	0.68551	TRUE	FALSE	TRUE	FALSE	0.289157	0.961431	0.557762	-0.0223366	0.993745	0.967539	-0.571233	0.998776	0.415011	-0.311494	0.992075	0.572088	-0.86039	1	0.224873	-0.548896	0.901287	0.459501	FALSE	FALSE	FALSE	FALSE	FALSE	FALSE
Q15257	PTPA	Serine/threonine-protein phosphatase 2A activator	0.91444	0.70253	0	0	TRUE	FALSE	FALSE	FALSE	NA	NA	NA	NA	NA	NA	NA	NA	NA	NA	NA	NA	NA	NA	NA	NA	NA	NA	NA	NA	NA	NA	NA	NA
P18031	PTPN1	Tyrosine-protein phosphatase non-receptor type 1	0.68551	0.79793	0.11793	0	FALSE	TRUE	FALSE	FALSE	NA	NA	NA	NA	NA	NA	NA	NA	NA	NA	NA	NA	NA	NA	NA	NA	NA	NA	NA	NA	NA	NA	NA	NA
Q06124	PTPN11	Tyrosine-protein phosphatase non-receptor type 11	0.98418	0.81421	0.83479	0	TRUE	TRUE	TRUE	FALSE	0.459017	0.961093	0.551409	2.57395	0.946354	0.0069313	4.89212	0.982744	0.000230591	2.11494	0.929424	0.0221576	4.4331	1	0.000598707	2.31817	0.632457	0.0557946	FALSE	FALSE	FALSE	FALSE	FALSE	FALSE
P23468	PTPRD	Receptor-type tyrosine-protein phosphatase delta	0.97548	0.77794	0.68551	0	TRUE	TRUE	FALSE	FALSE	0.871995	0.93817	0.29808	2.92419	0.936224	0.00478028	4.14835	0.992872	0.00200753	2.05219	0.950486	0.0367074	3.27636	1	0.010655	1.22417	0.874119	0.329221	FALSE	FALSE	FALSE	FALSE	FALSE	FALSE
P10586	PTPRF	Receptor-type tyrosine-protein phosphatase F	0.90788	0.82598	0.71552	0.68551	TRUE	TRUE	FALSE	FALSE	0.139832	0.972422	0.860315	-1.44276	0.984226	0.116714	-0.0614849	0.9991	0.95635	-1.58259	0.972653	0.0873876	-0.201317	1	0.857825	1.38128	0.848947	0.255007	FALSE	FALSE	FALSE	FALSE	FALSE	FALSE
Q15262	PTPRK	Receptor-type tyrosine-protein phosphatase kappa	0.97849	0.85187	0.68551	0	TRUE	TRUE	FALSE	FALSE	0.315292	0.962612	0.580981	2.04426	0.933099	0.00431817	2.65425	0.994231	0.00356714	1.72897	0.896418	0.0129183	2.33896	1	0.00854526	0.609993	0.904089	0.477764	FALSE	FALSE	FALSE	FALSE	FALSE	FALSE
Q16849	PTPRN	Receptor-type tyrosine-protein phosphatase-like N	0.78332	0.71709	0.68551	0	TRUE	FALSE	FALSE	FALSE	NA	NA	NA	NA	NA	NA	NA	NA	NA	NA	NA	NA	NA	NA	NA	NA	NA	NA	NA	NA	NA	NA	NA	NA
Q13332	PTPRS	Receptor-type tyrosine-protein phosphatase S	0.87146	0.91609	0.68551	0	TRUE	TRUE	FALSE	FALSE	-1.17871	0.905218	0.167829	0.849571	0.990214	0.366511	1.53991	0.998453	0.200906	2.02828	0.953427	0.040088	2.71862	1	0.0307093	0.690339	0.917184	0.581699	FALSE	FALSE	FALSE	FALSE	FALSE	FALSE
P23471	PTPRZ1	Receptor-type tyrosine-protein phosphatase zeta	0.95781	0.84656	0.99019	0.92772	TRUE	TRUE	TRUE	TRUE	-0.0864956	0.972274	0.854517	0.040741	0.993645	0.938403	0.388686	0.998897	0.56182	0.127237	0.993739	0.809428	0.475182	1	0.479196	0.347945	0.921447	0.623925	FALSE	FALSE	FALSE	FALSE	FALSE	FALSE
Q00577	PURA	Transcriptional activator protein Pur-alpha	0.97977	0.79184	0.94831	0.92066	TRUE	TRUE	TRUE	TRUE	-0.498932	0.928713	0.246318	-0.929067	0.979369	0.0612367	-0.787033	0.998446	0.197964	-0.430135	0.989394	0.367713	-0.288102	1	0.630585	0.142034	0.936468	0.822681	FALSE	FALSE	FALSE	FALSE	FALSE	FALSE
P11216	PYGB	Glycogen phosphorylase, brain form	0.82168	0.83247	0.76298	0.93406	TRUE	TRUE	TRUE	TRUE	0.188543	0.964841	0.62956	0.368809	0.990593	0.401854	0.988667	0.997979	0.085409	0.180266	0.992943	0.679718	0.800124	1	0.158065	0.619858	0.864231	0.296298	FALSE	FALSE	FALSE	FALSE	FALSE	FALSE
P11217	PYGM	Glycogen phosphorylase, muscle form	0.98734	0.62461	0.68551	0	TRUE	FALSE	FALSE	FALSE	0.146373	0.970586	0.792644	2.65147	0.787393	0.000402971	3.59924	0.981608	0.00019992	2.50509	0.432447	0.000686175	3.45286	1	0.000303485	0.947769	0.852773	0.264422	FALSE	FALSE	FALSE	FALSE	FALSE	FALSE
P09417	QDPR	Dihydropteridine reductase	0.96369	0.77996	0.98886	0.9721	TRUE	TRUE	TRUE	TRUE	-1.25426	0.419318	0.00853619	-0.716271	0.985752	0.149246	-0.659538	0.998619	0.287253	0.537986	0.987106	0.272689	0.594719	1	0.335848	0.0567332	0.942319	0.930123	FALSE	FALSE	FALSE	FALSE	FALSE	FALSE
P61026	RAB10	Ras-related protein Rab-10	0.88229	0.75363	0.98535	0.98768	TRUE	TRUE	TRUE	TRUE	-0.283007	0.959343	0.520395	-0.733142	0.985624	0.146055	0.535125	0.998753	0.39228	-0.450134	0.98931	0.363333	0.818132	1	0.196827	1.26827	0.654791	0.0657496	FALSE	FALSE	FALSE	FALSE	FALSE	FALSE
P62491;Q15907	RAB11A	Ras-related protein Rab-11A;Ras-related protein Rab-11B	0.90056	0.58131	0.92194	0.68551	TRUE	FALSE	TRUE	FALSE	NA	NA	NA	NA	NA	NA	NA	NA	NA	NA	NA	NA	NA	NA	NA	NA	NA	NA	NA	NA	NA	NA	NA	NA
P61106	RAB14	Ras-related protein Rab-14	0.9752	0.79386	0.83616	0.96892	TRUE	TRUE	TRUE	TRUE	-0.0993659	0.97011	0.776541	-0.22457	0.991918	0.567491	-0.314328	0.998873	0.527372	-0.125204	0.993396	0.749135	-0.214962	1	0.664637	-0.0897579	0.938869	0.864187	FALSE	FALSE	FALSE	FALSE	FALSE	FALSE
Q9NP72	RAB18	Ras-related protein Rab-18	0.97972	0.85538	0.83284	0	TRUE	TRUE	TRUE	FALSE	0.378843	0.961051	0.55063	2.14261	0.944577	0.00645942	3.26365	0.992237	0.00160265	1.76377	0.9261	0.0207632	2.88481	1	0.00417482	1.12104	0.844924	0.245679	FALSE	FALSE	FALSE	FALSE	FALSE	FALSE
P62820	RAB1A	Ras-related protein Rab-1A	0.8973	0.79656	0.98911	0.99044	TRUE	TRUE	TRUE	TRUE	0.160008	0.965253	0.639293	-0.163919	0.992496	0.667439	-0.0882535	0.999058	0.854584	-0.323927	0.989952	0.399346	-0.248261	1	0.607334	0.0756653	0.939854	0.882209	FALSE	FALSE	FALSE	FALSE	FALSE	FALSE
Q9H0U4	RAB1B	Ras-related protein Rab-1B	0.93685	0.22387	0.68551	0	TRUE	FALSE	FALSE	FALSE	1.80743	0.261388	0.00326618	1.88578	0.939689	0.00538587	2.53185	0.994196	0.00350738	0.0783525	0.994174	0.897016	0.724428	1	0.349955	0.646076	0.896394	0.430276	FALSE	FALSE	FALSE	FALSE	FALSE	FALSE
Q9ULC3	RAB23	Ras-related protein Rab-23	0.9495	0.85914	0.68551	0	TRUE	TRUE	FALSE	FALSE	-1.02896	0.940971	0.317151	1.74057	0.985233	0.136884	2.88941	0.997693	0.0558973	2.76953	0.931955	0.0233325	3.91837	1	0.0125545	1.14884	0.900359	0.453714	FALSE	FALSE	FALSE	FALSE	FALSE	FALSE
P61019	RAB2A	Ras-related protein Rab-2A	0.992	0.80286	0.92814	0	TRUE	TRUE	TRUE	FALSE	0.492867	0.954863	0.453289	1.03048	0.98646	0.168792	4.55128	0.973328	8.97e-05	0.537616	0.990898	0.4642	4.05841	1	0.000295247	3.52079	0.103129	0.00181088	FALSE	FALSE	FALSE	FALSE	FALSE	FALSE
Q15286	RAB35	Ras-related protein Rab-35	0.9481	0.83248	0	0	TRUE	TRUE	FALSE	FALSE	1.47788	0.639801	0.0244772	2.79191	0.824828	0.000598004	2.79191	0.994536	0.00414998	1.31403	0.967158	0.0666584	1.31403	1	0.140219	0	0.945566	1	FALSE	FALSE	FALSE	FALSE	FALSE	FALSE
P20336	RAB3A	Ras-related protein Rab-3A	0.88797	0.84482	0.98876	0.87692	TRUE	TRUE	TRUE	TRUE	-0.413807	0.948554	0.380994	0.102674	0.993296	0.844269	0.614157	0.998715	0.358406	0.516481	0.988601	0.329338	1.02796	1	0.13201	0.511482	0.90274	0.468826	FALSE	FALSE	FALSE	FALSE	FALSE	FALSE
Q96E17	RAB3C	Ras-related protein Rab-3C	0.97805	0.48163	0.68551	0	TRUE	FALSE	FALSE	FALSE	1.23865	0.882038	0.124714	2.0687	0.970802	0.0270694	2.93182	0.996464	0.0147592	0.83005	0.988991	0.347313	1.69317	1	0.136991	0.863124	0.90202	0.464166	FALSE	FALSE	FALSE	FALSE	FALSE	FALSE
P61018	RAB4B	Ras-related protein Rab-4B	0.8666	0.87712	0.68551	0	TRUE	TRUE	FALSE	FALSE	NA	NA	NA	NA	NA	NA	NA	NA	NA	NA	NA	NA	NA	NA	NA	NA	NA	NA	NA	NA	NA	NA	NA	NA
P20339	RAB5A	Ras-related protein Rab-5A	0.91701	0.74242	0.97745	0.90462	TRUE	FALSE	TRUE	TRUE	-0.178729	0.968037	0.712419	-0.964316	0.982214	0.0873733	-0.557995	0.99878	0.419195	-0.785587	0.981571	0.158134	-0.379266	1	0.581099	0.40632	0.916714	0.577333	FALSE	FALSE	FALSE	FALSE	FALSE	FALSE
P61020	RAB5B	Ras-related protein Rab-5B	0.99189	0.80244	0.98192	0.9759	TRUE	TRUE	TRUE	TRUE	-0.351157	0.939757	0.308631	-0.224442	0.991848	0.556699	-0.169303	0.998995	0.725135	0.126714	0.993335	0.739187	0.181853	1	0.705753	0.0551389	0.941508	0.913891	FALSE	FALSE	FALSE	FALSE	FALSE	FALSE
P51148	RAB5C	Ras-related protein Rab-5C	0.9772	0.78527	0.98102	0.99308	TRUE	TRUE	TRUE	TRUE	-0.303616	0.943194	0.333835	0.374939	0.989148	0.287134	0.814076	0.997904	0.0759125	0.678555	0.965687	0.0625043	1.11769	1	0.0186157	0.439137	0.879803	0.350971	FALSE	FALSE	FALSE	FALSE	FALSE	FALSE
P20340	RAB6A	Ras-related protein Rab-6A	0.89558	0.58993	0.68551	0	TRUE	FALSE	FALSE	FALSE	0.0244549	0.975198	0.982544	1.46662	0.988488	0.249413	2.76418	0.998032	0.0930121	1.44217	0.986601	0.257108	2.73973	1	0.0957203	1.29756	0.898551	0.442768	FALSE	FALSE	FALSE	FALSE	FALSE	FALSE
Q9NRW1	RAB6B	Ras-related protein Rab-6B	0.9621	0.81032	0.97511	0.94403	TRUE	TRUE	TRUE	TRUE	-0.994681	0.453083	0.0108712	-1.05896	0.961646	0.0145339	-0.338294	0.998854	0.503701	-0.0642808	0.994055	0.871561	0.656387	1	0.202018	0.720668	0.81271	0.187316	FALSE	FALSE	FALSE	FALSE	FALSE	FALSE
P51149	RAB7A	Ras-related protein Rab-7a	0.95123	0.84587	0.97253	0.99403	TRUE	TRUE	TRUE	TRUE	-0.744965	0.659501	0.0268443	-0.832133	0.970754	0.0269667	0.0230886	0.999101	0.958479	-0.0871675	0.993709	0.803813	0.768054	1	0.0959541	0.855221	0.681138	0.0816566	FALSE	FALSE	FALSE	FALSE	FALSE	FALSE
P63000	RAC1	Ras-related C3 botulinum toxin substrate 1	0.98475	0.70423	0.98098	0.96878	TRUE	FALSE	TRUE	TRUE	0.471927	0.939296	0.3055	-0.512037	0.989628	0.319606	-0.320977	0.998934	0.61817	-0.983965	0.966494	0.0647247	-0.792904	1	0.226193	0.19106	0.933727	0.77917	FALSE	FALSE	FALSE	FALSE	FALSE	FALSE
P63244	RACK1	Receptor of activated protein C kinase 1	0.97652	0.71235	0.97473	0.98323	TRUE	FALSE	TRUE	TRUE	-0.792555	0.846241	0.0866508	-0.870312	0.982588	0.0919624	-0.971457	0.998242	0.133678	-0.0777569	0.994074	0.875459	-0.178902	1	0.775758	-0.101145	0.939693	0.879219	FALSE	FALSE	FALSE	FALSE	FALSE	FALSE
P11233	RALA	Ras-related protein Ral-A	0.88567	0.66484	0.68551	0.68551	TRUE	FALSE	FALSE	FALSE	0.00226565	0.975498	0.997465	0.128986	0.993401	0.87151	0.396095	0.998979	0.695092	0.126721	0.994065	0.873746	0.393829	1	0.696742	0.267108	0.935256	0.802958	FALSE	FALSE	FALSE	FALSE	FALSE	FALSE
P11234	RALB	Ras-related protein Ral-B	0.94142	0.81052	0.98908	0.68551	TRUE	TRUE	TRUE	FALSE	-0.753269	0.818317	0.0686218	0.0904662	0.993269	0.83759	0.195123	0.998996	0.726997	0.843735	0.96765	0.0681569	0.948391	1	0.101807	0.104656	0.938618	0.859687	FALSE	FALSE	FALSE	FALSE	FALSE	FALSE
P62826	RAN	GTP-binding nuclear protein Ran	0.98737	0.67419	0.84984	0.96353	TRUE	FALSE	TRUE	TRUE	0.164195	0.967686	0.702439	0.261132	0.992045	0.587615	0.730795	0.998533	0.237525	0.0969375	0.993898	0.839892	0.566601	1	0.356051	0.469663	0.902719	0.468688	FALSE	FALSE	FALSE	FALSE	FALSE	FALSE
P61224	RAP1B	Ras-related protein Rap-1b	0.87386	0.88348	0.9903	0.86929	TRUE	TRUE	TRUE	TRUE	-0.339269	0.954988	0.45496	-0.160451	0.9929	0.750406	0.631836	0.998677	0.327886	0.178817	0.993233	0.723043	0.971105	1	0.139512	0.792288	0.846765	0.249877	FALSE	FALSE	FALSE	FALSE	FALSE	FALSE
P52306	RAP1GDS1	Rap1 GTPase-GDP dissociation stimulator 1	0.94197	0.57815	0.81452	0	TRUE	FALSE	TRUE	FALSE	1.1139	0.912779	0.187768	1.49786	0.984237	0.116905	3.1663	0.996318	0.0130665	0.383966	0.99293	0.677971	2.05241	1	0.0912559	1.66844	0.813434	0.188374	FALSE	FALSE	FALSE	FALSE	FALSE	FALSE
P10114	RAP2A	Ras-related protein Rap-2a	0.92841	0.5987	0.68551	0.68551	TRUE	FALSE	FALSE	FALSE	1.07054	0.84356	0.0845962	1.03253	0.985047	0.13279	-0.190172	0.999043	0.821304	-0.0380143	0.994427	0.954427	-1.26072	1	0.145935	-1.2227	0.808687	0.181599	FALSE	FALSE	FALSE	FALSE	FALSE	FALSE
P02753	RBP4	Retinol-binding protein 4	0.80436	0.07981	0	0	TRUE	FALSE	FALSE	FALSE	NA	NA	NA	NA	NA	NA	NA	NA	NA	NA	NA	NA	NA	NA	NA	NA	NA	NA	NA	NA	NA	NA	NA	NA
Q8TC12	RDH11	Retinol dehydrogenase 11	0.80407	0.1977	0	0	TRUE	FALSE	FALSE	FALSE	NA	NA	NA	NA	NA	NA	NA	NA	NA	NA	NA	NA	NA	NA	NA	NA	NA	NA	NA	NA	NA	NA	NA	NA
P35241	RDX	Radixin	0.87263	0.59496	0.68551	0	TRUE	FALSE	FALSE	FALSE	-0.834365	0.94029	0.31232	1.16213	0.987673	0.211643	1.69566	0.998313	0.152488	1.99649	0.952569	0.039047	2.53002	1	0.0387285	0.53353	0.924982	0.662971	FALSE	FALSE	FALSE	FALSE	FALSE	FALSE
Q15493	RGN	Regucalcin	0.85435	0.94534	0.68551	0.68551	TRUE	TRUE	FALSE	FALSE	0.781117	0.914579	0.193122	0.123332	0.993321	0.850747	-0.347165	0.998969	0.676009	-0.657785	0.988434	0.322057	-1.12828	1	0.184212	-0.470497	0.91847	0.59392	FALSE	FALSE	FALSE	FALSE	FALSE	FALSE
P49802	RGS7	Regulator of G-protein signaling 7	0.93853	0.6429	0.68551	0	TRUE	FALSE	FALSE	FALSE	0.665927	0.95813	0.500613	2.54732	0.972145	0.0301921	3.40504	0.996938	0.0229288	1.8814	0.974915	0.0993872	2.73911	1	0.0608222	0.85772	0.915058	0.562385	FALSE	FALSE	FALSE	FALSE	FALSE	FALSE
P61586	RHOA	Transforming protein RhoA	0.91312	0.7512	0.8822	0.96383	TRUE	TRUE	TRUE	TRUE	-0.378459	0.948677	0.382212	-0.77574	0.984288	0.117829	-0.813027	0.998426	0.19036	-0.397281	0.990146	0.411374	-0.434567	1	0.476417	-0.0372863	0.943459	0.953738	FALSE	FALSE	FALSE	FALSE	FALSE	FALSE
P62745	RHOB	Rho-related GTP-binding protein RhoB	0.98064	0.83383	0.83614	0.68551	TRUE	TRUE	TRUE	FALSE	0.427794	0.927384	0.240285	-0.000887274	0.993847	0.998228	0.0455647	0.999089	0.928148	-0.428681	0.987635	0.290772	-0.382229	1	0.452925	0.046452	0.942359	0.93093	FALSE	FALSE	FALSE	FALSE	FALSE	FALSE
P52758	RIDA	2-iminobutanoate/2-iminopropanoate deaminase	0.90267	0.59401	0.68551	0	TRUE	FALSE	FALSE	FALSE	NA	NA	NA	NA	NA	NA	NA	NA	NA	NA	NA	NA	NA	NA	NA	NA	NA	NA	NA	NA	NA	NA	NA	NA
Q96TC7	RMDN3	Regulator of microtubule dynamics protein 3	0.97735	0.80188	0.83816	0	TRUE	TRUE	TRUE	FALSE	2.62717	0.0573873	0.000620383	2.39127	0.925521	0.00344354	3.49446	0.990934	0.00107416	-0.235906	0.993364	0.74398	0.867284	1	0.347803	1.10319	0.852099	0.262723	FALSE	FALSE	FALSE	FALSE	FALSE	FALSE
Q9H1E1	RNASE7	Ribonuclease 7	0.70758	0.44756	0.68551	0.97102	FALSE	FALSE	FALSE	TRUE	0.379233	0.961671	0.562354	-0.215259	0.992978	0.767868	-1.24543	0.998418	0.187246	-0.594493	0.990259	0.418708	-1.62466	1	0.0905143	-1.03017	0.865166	0.299178	FALSE	FALSE	FALSE	FALSE	FALSE	FALSE
P13489	RNH1	Ribonuclease inhibitor	0.80755	0.80008	0.98017	0.99283	TRUE	TRUE	TRUE	TRUE	0.142393	0.966521	0.670957	0.616326	0.983938	0.111721	0.767809	0.998167	0.116868	0.473933	0.984928	0.214771	0.625415	1	0.19642	0.151483	0.932636	0.762893	FALSE	FALSE	FALSE	FALSE	FALSE	FALSE
P10155	RO60	RNA-binding protein RO60	0.91022	0.46323	0.68551	0.68551	TRUE	FALSE	FALSE	FALSE	-0.12718	0.968645	0.730286	-0.157203	0.992678	0.703205	-1.28695	0.996896	0.0219794	-0.0300227	0.994373	0.94188	-1.15977	1	0.0365206	-1.12974	0.624038	0.0526403	FALSE	FALSE	FALSE	FALSE	FALSE	FALSE
Q9Y2J0	RPH3A	Rabphilin-3A	0.96843	0.85721	0.68551	0	TRUE	TRUE	FALSE	FALSE	1.72638	0.536699	0.0156814	2.08394	0.954525	0.00994775	2.87216	0.995106	0.00566847	0.357562	0.99255	0.627365	1.14578	1	0.22683	0.788214	0.895931	0.42767	FALSE	FALSE	FALSE	FALSE	FALSE	FALSE
P27635	RPL10	60S ribosomal protein L10	0.97429	0.67285	0.83973	0	TRUE	FALSE	TRUE	FALSE	0.174895	0.970146	0.777745	1.2876	0.98108	0.0753223	2.6758	0.995241	0.00614094	1.11271	0.977911	0.120267	2.5009	1	0.00955125	1.38819	0.779018	0.146742	FALSE	FALSE	FALSE	FALSE	FALSE	FALSE
P62906	RPL10A	60S ribosomal protein L10a	0.90705	0.92542	0.87757	0.68551	TRUE	TRUE	TRUE	FALSE	0.0252697	0.974759	0.961376	-0.787546	0.987045	0.1878	-0.0187874	0.999109	0.979689	-0.812816	0.982741	0.17469	-0.0440571	1	0.952394	0.768759	0.874996	0.33243	FALSE	FALSE	FALSE	FALSE	FALSE	FALSE
P62913	RPL11	60S ribosomal protein L11	0.93976	0.85171	0.92941	0.68551	TRUE	TRUE	TRUE	FALSE	-0.151334	0.971464	0.823854	-0.447225	0.991856	0.557927	-0.701367	0.998826	0.468713	-0.295892	0.993065	0.697491	-0.550033	1	0.568782	-0.254142	0.935274	0.803237	FALSE	FALSE	FALSE	FALSE	FALSE	FALSE
P30050	RPL12	60S ribosomal protein L12	0.98561	0.76715	0.86698	0.68551	TRUE	TRUE	TRUE	FALSE	0.143664	0.969024	0.741793	-1.05976	0.975406	0.0403918	-1.1226	0.997945	0.0808767	-1.20342	0.928865	0.0219119	-1.26627	1	0.0514424	-0.062844	0.941983	0.923347	FALSE	FALSE	FALSE	FALSE	FALSE	FALSE
P26373	RPL13	60S ribosomal protein L13	0.85353	0.56674	0.8292	0	TRUE	FALSE	TRUE	FALSE	NA	NA	NA	NA	NA	NA	NA	NA	NA	NA	NA	NA	NA	NA	NA	NA	NA	NA	NA	NA	NA	NA	NA	NA
P40429	RPL13A	60S ribosomal protein L13a	0.95245	0.64503	0.83514	0	TRUE	FALSE	TRUE	FALSE	0.178189	0.970124	0.777026	0.477557	0.991445	0.499509	1.72433	0.997796	0.0646698	0.299368	0.99288	0.67087	1.54614	1	0.0946139	1.24678	0.818791	0.196514	FALSE	FALSE	FALSE	FALSE	FALSE	FALSE
P50914	RPL14	60S ribosomal protein L14	0.91287	0.51452	0.8247	0.9363	TRUE	FALSE	TRUE	TRUE	0.425568	0.936178	0.285695	-0.110232	0.993123	0.801704	-1.21172	0.997433	0.0398006	-0.5358	0.985638	0.231219	-1.63729	1	0.00775698	-1.10149	0.669101	0.0736968	FALSE	FALSE	FALSE	FALSE	FALSE	FALSE
P61313	RPL15	60S ribosomal protein L15	0.98811	0.69525	0.91395	0.68551	TRUE	FALSE	TRUE	FALSE	0.366128	0.948104	0.376599	0.0364392	0.993638	0.936575	0.668062	0.99857	0.257342	-0.329689	0.991031	0.474694	0.301934	1	0.603524	0.631623	0.868826	0.310891	FALSE	FALSE	FALSE	FALSE	FALSE	FALSE
Q07020	RPL18	60S ribosomal protein L18	0.87843	0.61006	0.98242	0.68551	TRUE	FALSE	TRUE	FALSE	-0.0427063	0.974302	0.940131	-0.559742	0.990404	0.383683	-0.758737	0.998707	0.351299	-0.517036	0.990283	0.420292	-0.716031	1	0.378442	-0.198995	0.936042	0.815648	FALSE	FALSE	FALSE	FALSE	FALSE	FALSE
Q02543	RPL18A	60S ribosomal protein L18a	0.9325	0.73738	0.92228	0	TRUE	FALSE	TRUE	FALSE	0.0132828	0.975222	0.98372	-0.966705	0.987237	0.194659	2.24275	0.996969	0.0236478	-0.979988	0.983604	0.188878	2.22947	1	0.0243761	3.20945	0.173247	0.00367199	FALSE	FALSE	FALSE	FALSE	FALSE	FALSE
P35268	RPL22	60S ribosomal protein L22	0.9088	0.59614	0.68551	0.68551	TRUE	FALSE	FALSE	FALSE	0.124235	0.971694	0.832374	-0.500539	0.991035	0.449012	-0.950296	0.998575	0.260517	-0.624775	0.98898	0.346809	-1.07453	1	0.205456	-0.449757	0.92015	0.610551	FALSE	FALSE	FALSE	FALSE	FALSE	FALSE
P46779	RPL28	60S ribosomal protein L28	0.93377	0.75624	0.68551	0	TRUE	TRUE	FALSE	FALSE	-0.329602	0.966937	0.681913	2.00226	0.974204	0.0361122	2.83954	0.996827	0.0205488	2.33186	0.913766	0.0167078	3.16914	1	0.0109891	0.837284	0.905801	0.489522	FALSE	FALSE	FALSE	FALSE	FALSE	FALSE
P62888	RPL30	60S ribosomal protein L30	0.98032	0.63107	0.68551	0.68552	TRUE	FALSE	FALSE	FALSE	0.998532	0.653524	0.0260942	0.0275189	0.993695	0.953038	-0.904766	0.998259	0.137911	-0.971013	0.959624	0.0492886	-1.9033	1	0.00426425	-0.932285	0.781081	0.148816	FALSE	FALSE	FALSE	FALSE	FALSE	FALSE
P62899	RPL31	60S ribosomal protein L31	0.93846	0.58011	0.88724	0	TRUE	FALSE	TRUE	FALSE	0.0641815	0.974543	0.951263	-0.53572	0.992399	0.649105	2.54046	0.998075	0.099773	-0.599902	0.992414	0.610653	2.47628	1	0.107991	3.07618	0.649279	0.0630472	FALSE	FALSE	FALSE	FALSE	FALSE	FALSE
P36578	RPL4	60S ribosomal protein L4	0.97912	0.63459	0.89933	0.96305	TRUE	FALSE	TRUE	TRUE	0.0173264	0.974869	0.96665	-1.80706	0.858105	0.000916309	-0.136951	0.99904	0.815365	-1.82438	0.461611	0.000841804	-0.154278	1	0.792551	1.67011	0.389457	0.0138465	FALSE	FALSE	FALSE	FALSE	FALSE	FALSE
P46777	RPL5	60S ribosomal protein L5	0.98568	0.82751	0.83629	0	TRUE	TRUE	TRUE	FALSE	0.611656	0.946572	0.36229	1.99742	0.960601	0.0136833	3.46584	0.991967	0.00146583	1.38576	0.96949	0.0743042	2.85419	1	0.00635711	1.46842	0.784075	0.151907	FALSE	FALSE	FALSE	FALSE	FALSE	FALSE
P18124	RPL7	60S ribosomal protein L7	0.94203	0.59658	0.81442	0	TRUE	FALSE	TRUE	FALSE	0.863678	0.947043	0.366589	1.61041	0.98536	0.139756	3.27862	0.996936	0.0228891	0.746734	0.991134	0.48304	2.41494	1	0.0835858	1.66821	0.846148	0.248457	FALSE	FALSE	FALSE	FALSE	FALSE	FALSE
P32969	RPL9P9	60S ribosomal protein L9	0.97601	0.85378	0.8924	0	TRUE	TRUE	TRUE	FALSE	-0.646605	0.932407	0.264544	0.161579	0.993115	0.799822	2.35605	0.995695	0.00821294	0.808184	0.984903	0.214233	3.00265	1	0.00135239	2.19447	0.436859	0.0178304	FALSE	FALSE	FALSE	FALSE	FALSE	FALSE
P05388	RPLP0	60S acidic ribosomal protein P0	0.95164	0.87406	0.97703	0.68551	TRUE	TRUE	TRUE	FALSE	0.20317	0.962991	0.58878	0.0329795	0.99364	0.937187	-0.263117	0.998936	0.62033	-0.170191	0.992979	0.684909	-0.466287	1	0.383462	-0.296096	0.919025	0.59933	FALSE	FALSE	FALSE	FALSE	FALSE	FALSE
P05387	RPLP2	60S acidic ribosomal protein P2	0.93293	0.60272	0.68551	0.92369	TRUE	FALSE	FALSE	TRUE	0.443302	0.954624	0.450127	-0.0396438	0.99369	0.951445	-1.47261	0.997986	0.0863901	-0.482946	0.990865	0.461623	-1.91591	1	0.0297318	-1.43296	0.73831	0.113407	FALSE	FALSE	FALSE	FALSE	FALSE	FALSE
P04843	RPN1	Dolichyl-diphosphooligosaccharide--protein glycosyltransferase subunit 1	0.72829	0.63019	0.68551	0.96884	FALSE	FALSE	FALSE	TRUE	0.607442	0.904753	0.166722	0.779535	0.984152	0.115405	-0.133164	0.999045	0.825787	0.172093	0.993209	0.719296	-0.740606	1	0.230054	-0.912699	0.796653	0.166046	FALSE	FALSE	FALSE	FALSE	FALSE	FALSE
P04844	RPN2	Dolichyl-diphosphooligosaccharide--protein glycosyltransferase subunit 2	0.91668	0.74489	0.68551	0	TRUE	FALSE	FALSE	FALSE	1.16082	0.914662	0.193376	1.56605	0.984425	0.120351	2.61957	0.997527	0.0447948	0.405237	0.992932	0.678155	1.45876	1	0.245467	1.05352	0.895339	0.424378	FALSE	FALSE	FALSE	FALSE	FALSE	FALSE
P46783	RPS10	40S ribosomal protein S10	0.88957	0.87019	0.89424	0.68551	TRUE	TRUE	TRUE	FALSE	0.0726795	0.972147	0.849574	-0.582815	0.986946	0.18438	0.299539	0.998911	0.581878	-0.655495	0.97983	0.137929	0.22686	1	0.676097	0.882355	0.768361	0.136705	FALSE	FALSE	FALSE	FALSE	FALSE	FALSE
P62280	RPS11	40S ribosomal protein S11	0.88414	0.54745	0.68551	0	TRUE	FALSE	FALSE	FALSE	NA	NA	NA	NA	NA	NA	NA	NA	NA	NA	NA	NA	NA	NA	NA	NA	NA	NA	NA	NA	NA	NA	NA	NA
P25398	RPS12	40S ribosomal protein S12	0.95184	0.64379	0.68551	0	TRUE	FALSE	FALSE	FALSE	0.349565	0.966604	0.673099	1.91551	0.977493	0.0497941	2.66655	0.997266	0.0326428	1.56595	0.97547	0.102769	2.31698	1	0.059551	0.751033	0.91324	0.546699	FALSE	FALSE	FALSE	FALSE	FALSE	FALSE
P62263	RPS14	40S ribosomal protein S14	0.82541	0.22559	0.68551	0	TRUE	FALSE	FALSE	FALSE	NA	NA	NA	NA	NA	NA	NA	NA	NA	NA	NA	NA	NA	NA	NA	NA	NA	NA	NA	NA	NA	NA	NA	NA
P62249	RPS16	40S ribosomal protein S16	0.876	0.8307	0.98897	0.68551	TRUE	TRUE	TRUE	FALSE	-0.559065	0.914012	0.191407	-0.69427	0.98574	0.148938	-1.32461	0.997335	0.0353642	-0.135206	0.993533	0.77244	-0.765541	1	0.205225	-0.630335	0.871842	0.321124	FALSE	FALSE	FALSE	FALSE	FALSE	FALSE
P62269	RPS18	40S ribosomal protein S18	0.85227	0.8787	0.95877	0.9871	TRUE	TRUE	TRUE	TRUE	-0.129469	0.969099	0.744096	-0.108747	0.993142	0.806146	0.0433468	0.999093	0.938313	0.020722	0.994461	0.962673	0.172816	1	0.757964	0.152094	0.93495	0.798104	FALSE	FALSE	FALSE	FALSE	FALSE	FALSE
P15880	RPS2	40S ribosomal protein S2	0.92874	0.53429	0.80783	0.68551	TRUE	FALSE	TRUE	FALSE	0.168686	0.969041	0.742305	-0.861322	0.985562	0.144545	-0.598162	0.998775	0.413396	-1.03001	0.972083	0.0847508	-0.766847	1	0.297229	0.263161	0.930485	0.732406	FALSE	FALSE	FALSE	FALSE	FALSE	FALSE
P60866	RPS20	40S ribosomal protein S20	0.90488	0.55951	0.89511	0	TRUE	FALSE	TRUE	FALSE	0.162134	0.972359	0.857847	0.0265816	0.993783	0.979036	2.41716	0.997863	0.0713486	-0.135552	0.994158	0.893428	2.25503	1	0.0906814	2.39058	0.698936	0.0908359	FALSE	FALSE	FALSE	FALSE	FALSE	FALSE
P62851	RPS25	40S ribosomal protein S25	0.90357	0.62598	0.89773	0	TRUE	FALSE	TRUE	FALSE	-0.872708	0.957568	0.491885	-0.777829	0.992015	0.582839	3.20778	0.997974	0.084772	0.0948783	0.994393	0.946361	4.08049	1	0.0322293	3.98561	0.605421	0.046562	FALSE	FALSE	FALSE	FALSE	FALSE	FALSE
P62857	RPS28	40S ribosomal protein S28	0.87321	0.50336	0.68551	0	TRUE	FALSE	FALSE	FALSE	0.17939	0.972402	0.859529	1.27332	0.988851	0.269253	2.26791	0.998209	0.125816	1.09393	0.988845	0.34041	2.08852	1	0.15661	0.994586	0.909332	0.515357	FALSE	FALSE	FALSE	FALSE	FALSE	FALSE
P23396	RPS3	40S ribosomal protein S3	0.91228	0.83965	0.97998	0.98797	TRUE	TRUE	TRUE	TRUE	-0.934831	0.706763	0.034003	-1.1545	0.967221	0.0207472	-1.05127	0.997974	0.0847713	-0.219668	0.992616	0.635628	-0.116435	1	0.84221	0.103234	0.93907	0.867817	FALSE	FALSE	FALSE	FALSE	FALSE	FALSE
P61247	RPS3A	40S ribosomal protein S3a	0.97998	0.76604	0.88602	0	TRUE	TRUE	TRUE	FALSE	0.74981	0.948236	0.377879	0.566604	0.991796	0.548811	3.86426	0.994463	0.00399816	-0.183206	0.993927	0.845598	3.11445	1	0.0160427	3.29766	0.419175	0.0161996	FALSE	FALSE	FALSE	FALSE	FALSE	FALSE
P62701	RPS4X	40S ribosomal protein S4, X isoform	0.98874	0.86578	0.96383	0.9839	TRUE	TRUE	TRUE	TRUE	-0.160674	0.967544	0.698466	-0.318888	0.9914	0.4936	0.970799	0.998131	0.109772	-0.158214	0.993295	0.732839	1.13147	1	0.065542	1.28969	0.614426	0.0493615	FALSE	FALSE	FALSE	FALSE	FALSE	FALSE
P46782	RPS5	40S ribosomal protein S5	0.83106	0.68884	0.68551	0	TRUE	FALSE	FALSE	FALSE	NA	NA	NA	NA	NA	NA	NA	NA	NA	NA	NA	NA	NA	NA	NA	NA	NA	NA	NA	NA	NA	NA	NA	NA
P62753	RPS6	40S ribosomal protein S6	0.93834	0.66057	0.82472	0	TRUE	FALSE	TRUE	FALSE	-1.12627	0.884102	0.127751	0.266602	0.992849	0.73931	2.00978	0.997733	0.0590916	1.39287	0.974018	0.0943094	3.13605	1	0.00558772	1.74318	0.743241	0.116801	FALSE	FALSE	FALSE	FALSE	FALSE	FALSE
P62081	RPS7	40S ribosomal protein S7	0.81267	0.90863	0.98454	0.89887	TRUE	TRUE	TRUE	TRUE	-0.695694	0.931528	0.260003	-0.760716	0.988868	0.270258	0.227248	0.999029	0.791298	-0.0650224	0.994294	0.923633	0.922941	1	0.289662	0.987964	0.860539	0.285371	FALSE	FALSE	FALSE	FALSE	FALSE	FALSE
P62241	RPS8	40S ribosomal protein S8	0.90867	0.67483	0.96987	0.99376	TRUE	FALSE	TRUE	TRUE	0.785443	0.850718	0.0902705	0.644604	0.987518	0.205408	1.13888	0.997961	0.0830201	-0.140839	0.993562	0.77739	0.353438	1	0.576118	0.494277	0.901757	0.462484	FALSE	FALSE	FALSE	FALSE	FALSE	FALSE
P08865	RPSA	40S ribosomal protein SA	0.89764	0.7896	0.97967	0.99404	TRUE	TRUE	TRUE	TRUE	-0.520738	0.894213	0.14463	-0.522491	0.987051	0.18798	-0.214224	0.998961	0.66268	-0.00175378	0.994597	0.996386	0.306513	1	0.533676	0.308267	0.914197	0.554863	FALSE	FALSE	FALSE	FALSE	FALSE	FALSE
Q9P2E9	RRBP1	Ribosome-binding protein 1	0.72748	0.2836	0.79347	0.68551	FALSE	FALSE	TRUE	FALSE	0.871912	0.940881	0.316504	-0.750104	0.99094	0.438237	-1.64223	0.998417	0.186817	-1.62202	0.975596	0.103561	-2.51414	1	0.0499393	-0.892128	0.906039	0.491193	FALSE	FALSE	FALSE	FALSE	FALSE	FALSE
Q9Y3I0	RTCB	RNA-splicing ligase RtcB homolog	0.99034	0.85544	0.83813	0	TRUE	TRUE	TRUE	FALSE	0.415266	0.964566	0.6232	1.82272	0.97991	0.0652438	3.88592	0.994404	0.00388238	1.40746	0.980656	0.146935	3.47066	1	0.00843874	2.0632	0.740641	0.114993	FALSE	FALSE	FALSE	FALSE	FALSE	FALSE
Q16799	RTN1	Reticulon-1	0.98777	0.83575	0.68551	0	TRUE	TRUE	FALSE	FALSE	0.443569	0.961568	0.56037	2.52789	0.947445	0.00724749	3.59124	0.993992	0.00318896	2.08432	0.930263	0.0225354	3.14767	1	0.00803277	1.06335	0.880929	0.355564	FALSE	FALSE	FALSE	FALSE	FALSE	FALSE
Q9NQC3	RTN4	Reticulon-4	0.98519	0.66326	0.78513	0.68551	TRUE	FALSE	TRUE	FALSE	-0.216419	0.96688	0.680385	-0.569138	0.989867	0.337701	0.769523	0.998648	0.306337	-0.352719	0.991857	0.549242	0.985942	1	0.194043	1.33866	0.718704	0.101259	FALSE	FALSE	FALSE	FALSE	FALSE	FALSE
Q86UN3	RTN4RL2	Reticulon-4 receptor-like 2	0.8092	0.91598	0.7906	0	TRUE	TRUE	TRUE	FALSE	-0.821678	0.961305	0.555375	-0.177287	0.99354	0.908964	2.56379	0.998454	0.201399	0.644392	0.992933	0.678371	3.38547	1	0.0969126	2.74108	0.819716	0.197976	FALSE	FALSE	FALSE	FALSE	FALSE	FALSE
Q7L099	RUFY3	Protein RUFY3	0.88596	0.62364	0.68551	0	TRUE	FALSE	FALSE	FALSE	0.0921285	0.973988	0.92597	1.56499	0.986476	0.169283	2.60393	0.997903	0.075829	1.47286	0.983915	0.194488	2.5118	1	0.0858665	1.03894	0.905547	0.487745	FALSE	FALSE	FALSE	FALSE	FALSE	FALSE
Q9Y265	RUVBL1	RuvB-like 1	0.94719	0.86351	0.71646	0.68551	TRUE	TRUE	FALSE	FALSE	0.116266	0.971991	0.843605	-0.489472	0.991136	0.460766	-0.314844	0.998985	0.706016	-0.605738	0.989309	0.363277	-0.43111	1	0.606127	0.174628	0.937691	0.843403	FALSE	FALSE	FALSE	FALSE	FALSE	FALSE
Q92736	RYR2	Ryanodine receptor 2	0.24893	0.63554	0.68551	0.99172	FALSE	FALSE	FALSE	TRUE	-0.575026	0.921781	0.217439	0.0455214	0.993611	0.928903	-1.81999	0.99602	0.0103508	0.620548	0.985718	0.233189	-1.24496	1	0.0660155	-1.86551	0.373201	0.0127274	FALSE	FALSE	FALSE	FALSE	FALSE	FALSE
P23297	S100A1	Protein S100-A1	0.75218	0.84447	0.51018	0.02402	TRUE	TRUE	FALSE	FALSE	0.0507983	0.974323	0.941095	-1.0605	0.986775	0.178662	0.0803545	0.999091	0.93413	-1.1113	0.981694	0.159748	0.0295562	1	0.975746	1.14085	0.857396	0.276577	FALSE	FALSE	FALSE	FALSE	FALSE	FALSE
P31949	S100A11	Protein S100-A11	0.64925	0.6584	0.78252	0.68551	FALSE	FALSE	TRUE	FALSE	0.135143	0.971462	0.8238	-0.805315	0.988383	0.244039	-1.16896	0.998409	0.183832	-0.940459	0.982862	0.176582	-1.3041	1	0.14046	-0.363644	0.927236	0.690035	FALSE	FALSE	FALSE	FALSE	FALSE	FALSE
P80511	S100A12	Protein S100-A12	0.76702	0	0.68551	0	TRUE	FALSE	FALSE	FALSE	NA	NA	NA	NA	NA	NA	NA	NA	NA	NA	NA	NA	NA	NA	NA	NA	NA	NA	NA	NA	NA	NA	NA	NA
Q99584	S100A13	Protein S100-A13	0.92272	0.42696	0	0	TRUE	FALSE	FALSE	FALSE	NA	NA	NA	NA	NA	NA	NA	NA	NA	NA	NA	NA	NA	NA	NA	NA	NA	NA	NA	NA	NA	NA	NA	NA
Q9HCY8	S100A14	Protein S100-A14	0.5886	0.59641	0.56186	0.989	FALSE	FALSE	FALSE	TRUE	0.160445	0.969739	0.764369	0.464002	0.990968	0.441385	-0.646874	0.998758	0.396997	0.303557	0.992432	0.612818	-0.807319	1	0.293134	-1.11088	0.80533	0.177037	FALSE	FALSE	FALSE	FALSE	FALSE	FALSE
Q96FQ6	S100A16	Protein S100-A16	0.77368	0.64383	0.73177	0	TRUE	FALSE	FALSE	FALSE	0.545306	0.944024	0.340461	2.20529	0.909755	0.00230845	3.25321	0.988685	0.000619182	1.65998	0.909801	0.0156852	2.7079	1	0.00290751	1.04792	0.835401	0.225678	FALSE	FALSE	FALSE	FALSE	FALSE	FALSE
P26447	S100A4	Protein S100-A4	0.80474	0.30421	0.68551	0	TRUE	FALSE	FALSE	FALSE	NA	NA	NA	NA	NA	NA	NA	NA	NA	NA	NA	NA	NA	NA	NA	NA	NA	NA	NA	NA	NA	NA	NA	NA
P06703	S100A6	Protein S100-A6	0.91768	0.51201	0.68551	0	TRUE	FALSE	FALSE	FALSE	-0.163362	0.972338	0.857017	2.4318	0.970045	0.0255147	3.43928	0.996397	0.0139494	2.59516	0.918666	0.0181403	3.60264	1	0.0105715	1.00748	0.90169	0.462056	FALSE	FALSE	FALSE	FALSE	FALSE	FALSE
P04271	S100B	Protein S100-B	0.84332	0.9065	0.86531	0.53226	TRUE	TRUE	TRUE	FALSE	0.396975	0.943209	0.333951	1.06966	0.97112	0.0277651	1.76826	0.995141	0.00578742	0.672688	0.98089	0.14967	1.37128	1	0.0259799	0.698594	0.850716	0.25929	FALSE	FALSE	FALSE	FALSE	FALSE	FALSE
P25815	S100P	Protein S100-P	0.65136	0.30532	0.83927	0.68551	FALSE	FALSE	TRUE	FALSE	0.335549	0.964997	0.633221	-0.852796	0.989103	0.284295	-0.508048	0.998929	0.609591	-1.18835	0.980162	0.141428	-0.843597	1	0.399476	0.344748	0.931275	0.743358	FALSE	FALSE	FALSE	FALSE	FALSE	FALSE
P49591	SARS1	Serine--tRNA ligase, cytoplasmic	0.97425	0.87716	0.81786	0.68551	TRUE	TRUE	TRUE	FALSE	0.3045	0.954126	0.443663	0.17962	0.992583	0.684319	1.24001	0.997366	0.0367106	-0.12488	0.993561	0.77717	0.935513	1	0.105961	1.06039	0.687725	0.0855949	FALSE	FALSE	FALSE	FALSE	FALSE	FALSE
Q6UWP8	SBSN	Suprabasin	0.86946	0.36715	0.68551	0.96012	TRUE	FALSE	FALSE	TRUE	0.05438	0.972803	0.875576	-0.786532	0.978354	0.0546202	-0.0677992	0.999073	0.8902	-0.840912	0.954365	0.0412815	-0.122179	1	0.803648	0.718733	0.806485	0.178585	FALSE	FALSE	FALSE	FALSE	FALSE	FALSE
Q14108	SCARB2	Lysosome membrane protein 2	0.83811	0.83077	0.98899	0.68551	TRUE	TRUE	TRUE	FALSE	-0.402207	0.916172	0.198086	-0.0623916	0.993338	0.855008	0.0578712	0.999074	0.893383	0.339815	0.988525	0.325992	0.460078	1	0.294045	0.120263	0.934626	0.793011	FALSE	FALSE	FALSE	FALSE	FALSE	FALSE
Q8NBX0	SCCPDH	Saccharopine dehydrogenase-like oxidoreductase	0.86724	0.86533	0.68551	0	TRUE	TRUE	FALSE	FALSE	NA	NA	NA	NA	NA	NA	NA	NA	NA	NA	NA	NA	NA	NA	NA	NA	NA	NA	NA	NA	NA	NA	NA	NA
P13521	SCG2	Secretogranin-2	0.95537	0.91321	0.97495	0.68551	TRUE	TRUE	TRUE	FALSE	-0.98252	0.863464	0.102093	-1.24392	0.980109	0.0668182	-0.0552234	0.999096	0.94619	-0.261399	0.992992	0.686798	0.927296	1	0.265434	1.18869	0.808765	0.181707	FALSE	FALSE	FALSE	FALSE	FALSE	FALSE
Q8WXD2	SCG3	Secretogranin-3	0.85118	0.43411	0.68551	0	TRUE	FALSE	FALSE	FALSE	NA	NA	NA	NA	NA	NA	NA	NA	NA	NA	NA	NA	NA	NA	NA	NA	NA	NA	NA	NA	NA	NA	NA	NA
Q99250	SCN2A	Sodium channel protein type 2 subunit alpha	0.89989	0.6911	0.68551	0	TRUE	FALSE	FALSE	FALSE	NA	NA	NA	NA	NA	NA	NA	NA	NA	NA	NA	NA	NA	NA	NA	NA	NA	NA	NA	NA	NA	NA	NA	NA
Q12765	SCRN1	Secernin-1	0.83367	0.83281	0.84831	0.99341	TRUE	TRUE	TRUE	TRUE	0.226169	0.958812	0.511581	0.971995	0.965965	0.0190426	0.180791	0.998987	0.709491	0.745826	0.966127	0.0636989	-0.0453784	1	0.925364	-0.791205	0.767196	0.135672	FALSE	FALSE	FALSE	FALSE	FALSE	FALSE
P31040	SDHA	Succinate dehydrogenase [ubiquinone] flavoprotein subunit, mitochondrial	0.86052	0.89256	0.82165	0.68551	TRUE	TRUE	TRUE	FALSE	0.424353	0.938198	0.298266	-0.0215422	0.993725	0.961751	-0.62774	0.998603	0.277259	-0.445895	0.988558	0.327438	-1.05209	1	0.0766354	-0.606198	0.871867	0.32121	FALSE	FALSE	FALSE	FALSE	FALSE	FALSE
Q13228	SELENBP1	Methanethiol oxidase	0.98553	0.85887	0.9906	0.97693	TRUE	TRUE	TRUE	TRUE	-1.10995	0.0654931	0.000726202	-0.453015	0.985996	0.155612	0.346559	0.998742	0.381971	0.656934	0.957281	0.0454154	1.45651	1	0.00139754	0.799574	0.657054	0.0669126	FALSE	FALSE	FALSE	FALSE	FALSE	FALSE
Q9NVA2	SEPTIN11	Septin-11	0.93582	0.85739	0.99186	0.68551	TRUE	TRUE	TRUE	FALSE	0.0587664	0.97296	0.881977	0.257783	0.991883	0.561973	-0.542889	0.998691	0.338262	0.199017	0.992754	0.653744	-0.601655	1	0.289961	-0.800672	0.813263	0.188123	FALSE	FALSE	FALSE	FALSE	FALSE	FALSE
Q15019	SEPTIN2	Septin-2	0.98502	0.82685	0.98879	0.9464	TRUE	TRUE	TRUE	TRUE	-0.719601	0.734015	0.0394558	-0.0701881	0.993313	0.848644	0.183858	0.998978	0.693165	0.649413	0.973178	0.0899459	0.903459	1	0.0642823	0.254046	0.919876	0.607791	FALSE	FALSE	FALSE	FALSE	FALSE	FALSE
Q9UH03	SEPTIN3	Neuronal-specific septin-3	0.92077	0.82155	0.94231	0.68551	TRUE	TRUE	TRUE	FALSE	-0.202581	0.966815	0.67866	-0.558831	0.989528	0.312504	-0.700268	0.998663	0.316918	-0.356249	0.991514	0.516117	-0.497687	1	0.473847	-0.141438	0.937887	0.846803	FALSE	FALSE	FALSE	FALSE	FALSE	FALSE
O43236	SEPTIN4	Septin-4	0.96751	0.70373	0	0	TRUE	FALSE	FALSE	FALSE	1.80642	0.541646	0.0160039	4.42509	0.296178	1.58e-05	4.42509	0.982285	0.000217406	2.61868	0.706411	0.00286727	2.61868	1	0.0138915	0	0.945566	1	FALSE	FALSE	FALSE	FALSE	FALSE	FALSE
Q99719	SEPTIN5	Septin-5	0.98589	0.79357	0.98674	0.99389	TRUE	TRUE	TRUE	TRUE	0.201826	0.963976	0.60992	0.231099	0.992128	0.60138	-0.795046	0.998355	0.16519	0.0292726	0.994395	0.94704	-0.996872	1	0.0863663	-1.02614	0.707775	0.0952962	FALSE	FALSE	FALSE	FALSE	FALSE	FALSE
Q14141	SEPTIN6	Septin-6	0.69214	0.90543	0.89406	0.98932	FALSE	TRUE	TRUE	TRUE	-0.326225	0.963983	0.610067	-0.364949	0.992178	0.609855	0.00274872	0.999116	0.997567	-0.0387234	0.994436	0.956664	0.328974	1	0.715633	0.367698	0.928117	0.701114	FALSE	FALSE	FALSE	FALSE	FALSE	FALSE
Q16181	SEPTIN7	Septin-7	0.8985	0.85424	0.74237	0.79746	TRUE	TRUE	FALSE	TRUE	0.296394	0.96431	0.617378	0.66349	0.989663	0.322199	1.15194	0.998396	0.179303	0.367096	0.99215	0.580279	0.855544	1	0.313154	0.488448	0.917364	0.583381	FALSE	FALSE	FALSE	FALSE	FALSE	FALSE
Q92599	SEPTIN8	Septin-8	0.85225	0.83652	0.96847	0.99165	TRUE	TRUE	TRUE	TRUE	-0.104094	0.971622	0.829689	-0.469862	0.99047	0.389817	0.85617	0.998497	0.220411	-0.365768	0.991351	0.501477	0.960264	1	0.171557	1.32603	0.679036	0.0801687	FALSE	FALSE	FALSE	FALSE	FALSE	FALSE
Q9UHD8	SEPTIN9	Septin-9	0.97623	0.83993	0.9635	0.68551	TRUE	TRUE	TRUE	FALSE	-0.34588	0.95401	0.442183	-0.887784	0.982257	0.0878889	-0.736248	0.99856	0.252227	-0.541904	0.98748	0.285274	-0.390368	1	0.538449	0.151536	0.93637	0.82106	FALSE	FALSE	FALSE	FALSE	FALSE	FALSE
P01009	SERPINA1	Alpha-1-antitrypsin	0.71927	0.62279	0.61077	0.82568	FALSE	FALSE	FALSE	TRUE	-0.560104	0.904721	0.166648	-0.181724	0.992565	0.680756	-1.21599	0.997438	0.0400258	0.37838	0.989885	0.395329	-0.655881	1	0.248203	-1.03426	0.703058	0.0928778	FALSE	FALSE	FALSE	FALSE	FALSE	FALSE
Q8IW75	SERPINA12	Serpin A12	0.66525	0.5277	0.39172	0.78942	FALSE	FALSE	FALSE	TRUE	0.557906	0.922746	0.221103	0.0280132	0.993703	0.955239	-1.88875	0.995473	0.00709439	-0.529893	0.987773	0.295803	-2.44666	1	0.000968864	-1.91677	0.314857	0.009436	FALSE	FALSE	FALSE	FALSE	FALSE	FALSE
P01011	SERPINA3	Alpha-1-antichymotrypsin	0.72019	0.75582	0.78402	0.68551	FALSE	TRUE	TRUE	FALSE	0.173179	0.967998	0.71128	-0.593512	0.988759	0.264047	-0.0718894	0.999083	0.91333	-0.766691	0.981222	0.153694	-0.245068	1	0.711105	0.521622	0.901354	0.45993	FALSE	FALSE	FALSE	FALSE	FALSE	FALSE
P30740	SERPINB1	Leukocyte elastase inhibitor	0.72828	0.68242	0.8381	0	FALSE	FALSE	TRUE	FALSE	1.00306	0.941757	0.322883	1.55826	0.986656	0.174855	3.8628	0.996276	0.0126267	0.5552	0.992499	0.620946	2.85974	1	0.055236	2.30454	0.768523	0.13685	FALSE	FALSE	FALSE	FALSE	FALSE	FALSE
P01012	SERPINB14	Ovalbumin	0.57966	0.75906	0.65512	0.94643	FALSE	TRUE	FALSE	TRUE	-0.716633	0.931473	0.259719	-0.687408	0.989785	0.331318	-1.47312	0.998121	0.107915	0.0292254	0.994477	0.966613	-0.756484	1	0.396502	-0.78571	0.891926	0.406189	FALSE	FALSE	FALSE	FALSE	FALSE	FALSE
P05120	SERPINB2	Plasminogen activator inhibitor 2	0.90815	0.06713	0.68551	0.99352	TRUE	FALSE	FALSE	TRUE	-0.870748	0.665648	0.0276473	-0.572588	0.986691	0.175957	-0.955327	0.997934	0.0795398	0.29816	0.991007	0.472739	-0.0845795	1	0.871193	-0.38274	0.906127	0.491816	FALSE	FALSE	FALSE	FALSE	FALSE	FALSE
P36952	SERPINB5	Serpin B5	0.92175	0.56473	0.68551	0.68551	TRUE	FALSE	FALSE	FALSE	0.563682	0.945539	0.353156	0.185517	0.99304	0.782261	0.335326	0.998978	0.69322	-0.378165	0.992097	0.574473	-0.228356	1	0.787959	0.149808	0.939069	0.867794	FALSE	FALSE	FALSE	FALSE	FALSE	FALSE
P35237	SERPINB6	Serpin B6	0.96773	0.75679	0.92687	0.68551	TRUE	TRUE	TRUE	FALSE	-0.465268	0.946529	0.361896	0.177	0.992916	0.753922	-1.24252	0.99804	0.0941655	0.642268	0.986802	0.263132	-0.777255	1	0.283648	-1.41952	0.66811	0.0730979	FALSE	FALSE	FALSE	FALSE	FALSE	FALSE
P50452	SERPINB8	Serpin B8	0.7593	0.71368	0.49801	0.68551	TRUE	FALSE	FALSE	FALSE	-0.164527	0.966718	0.676106	0.0729524	0.993388	0.86813	-0.704477	0.998485	0.214733	0.237479	0.992239	0.590239	-0.539951	1	0.337393	-0.77743	0.819441	0.197539	FALSE	FALSE	FALSE	FALSE	FALSE	FALSE
P01008	SERPINC1	Antithrombin-III	0.436	0.83053	0.71713	0	FALSE	TRUE	FALSE	FALSE	NA	NA	NA	NA	NA	NA	NA	NA	NA	NA	NA	NA	NA	NA	NA	NA	NA	NA	NA	NA	NA	NA	NA	NA
P05155	SERPING1	Plasma protease C1 inhibitor	0.96896	0.5298	0	0	TRUE	FALSE	FALSE	FALSE	1.97226	0.300546	0.00412125	3.69981	0.378638	3.07e-05	3.69981	0.986085	0.000377884	1.72755	0.921851	0.0191898	1.72755	1	0.0570776	0	0.945566	1	FALSE	FALSE	FALSE	FALSE	FALSE	FALSE
P0DME0;Q01105	SET	Protein SETSIP;Protein SET	0.8872	0.32977	0.68551	0.68551	TRUE	FALSE	FALSE	FALSE	NA	NA	NA	NA	NA	NA	NA	NA	NA	NA	NA	NA	NA	NA	NA	NA	NA	NA	NA	NA	NA	NA	NA	NA
Q9BYH1	SEZ6L	Seizure 6-like protein	0.97396	0.83041	0.68551	0	TRUE	TRUE	FALSE	FALSE	2.47202	0.677548	0.0292997	3.56762	0.945808	0.00678106	5.09481	0.993733	0.00284014	1.0956	0.989258	0.360604	2.62279	1	0.0926561	1.52719	0.877694	0.342632	FALSE	FALSE	FALSE	FALSE	FALSE	FALSE
P31947	SFN	14-3-3 protein sigma	0.73589	0.48912	0.83898	0.46083	FALSE	FALSE	TRUE	FALSE	0.496262	0.94315	0.333491	-0.403575	0.991286	0.479073	-2.51427	0.99313	0.00221586	-0.899836	0.978395	0.124347	-3.01053	1	0.000460975	-2.11069	0.350756	0.011341	FALSE	FALSE	FALSE	FALSE	FALSE	FALSE
P23246	SFPQ	Splicing factor, proline- and glutamine-rich	0.98805	0.54197	0.68551	0	TRUE	FALSE	FALSE	FALSE	1.91166	0.434228	0.00946602	2.47827	0.925338	0.00342578	3.42951	0.992397	0.00169307	0.566608	0.990734	0.451754	1.51784	1	0.120607	0.951237	0.879193	0.348528	FALSE	FALSE	FALSE	FALSE	FALSE	FALSE
Q9H9B4	SFXN1	Sideroflexin-1	0.97582	0.54209	0.64087	0	TRUE	FALSE	FALSE	FALSE	1.84502	0.457667	0.0112604	1.91206	0.964653	0.0174751	3.26685	0.993289	0.00235902	0.0670374	0.994313	0.92797	1.42183	1	0.141546	1.35479	0.810485	0.184119	FALSE	FALSE	FALSE	FALSE	FALSE	FALSE
Q9BWM7	SFXN3	Sideroflexin-3	0.80004	0.60607	0.68551	0	TRUE	FALSE	FALSE	FALSE	NA	NA	NA	NA	NA	NA	NA	NA	NA	NA	NA	NA	NA	NA	NA	NA	NA	NA	NA	NA	NA	NA	NA	NA
Q9BQI5	SGIP1	SH3-containing GRB2-like protein 3-interacting protein 1	0.87175	0.51523	0.68551	0	TRUE	FALSE	FALSE	FALSE	NA	NA	NA	NA	NA	NA	NA	NA	NA	NA	NA	NA	NA	NA	NA	NA	NA	NA	NA	NA	NA	NA	NA	NA
O43765	SGTA	Small glutamine-rich tetratricopeptide repeat-containing protein alpha	0.87805	0.86658	0	0	TRUE	TRUE	FALSE	FALSE	1.90043	0.74481	0.041983	3.66086	0.884223	0.00138484	3.66086	0.99565	0.00796678	1.76043	0.972449	0.0864273	1.76043	1	0.168807	0	0.945566	1	FALSE	FALSE	FALSE	FALSE	FALSE	FALSE
O75368	SH3BGRL	Adapter SH3BGRL	0.92252	0.77524	0.82876	0.96011	TRUE	TRUE	TRUE	TRUE	-0.440898	0.948564	0.381092	-0.342839	0.991737	0.540162	0.364298	0.998927	0.606281	0.0980591	0.994	0.860246	0.805196	1	0.261367	0.707137	0.879495	0.349734	FALSE	FALSE	FALSE	FALSE	FALSE	FALSE
Q9UJC5	SH3BGRL2	SH3 domain-binding glutamic acid-rich-like protein 2	0.99027	0.84897	0.98042	0.96419	TRUE	TRUE	TRUE	TRUE	-0.122169	0.969006	0.74125	-0.507893	0.988056	0.22834	-0.45624	0.998748	0.387522	-0.385724	0.98917	0.356151	-0.33407	1	0.524902	0.0516533	0.942102	0.925742	FALSE	FALSE	FALSE	FALSE	FALSE	FALSE
Q9H299	SH3BGRL3	SH3 domain-binding glutamic acid-rich-like protein 3	0.9652	0.37108	0.68551	0.67274	TRUE	FALSE	FALSE	FALSE	0.85562	0.82879	0.0745938	0.384561	0.991102	0.456739	-0.154936	0.999038	0.811326	-0.471058	0.98932	0.36381	-1.01056	1	0.131406	-0.539498	0.897529	0.436779	FALSE	FALSE	FALSE	FALSE	FALSE	FALSE
Q99962	SH3GL2	Endophilin-A1	0.85188	0.74738	0.89733	0.68551	TRUE	FALSE	TRUE	FALSE	-0.413198	0.952311	0.421407	-0.322984	0.991949	0.57227	-0.431798	0.99889	0.550814	0.0902143	0.994067	0.874151	-0.0185997	1	0.979397	-0.108814	0.940097	0.88676	FALSE	FALSE	FALSE	FALSE	FALSE	FALSE
Q9NR46	SH3GLB2	Endophilin-B2	0.98725	0.68382	0.68551	0	TRUE	FALSE	FALSE	FALSE	0.702427	0.916927	0.200514	2.96464	0.57324	8.77e-05	3.75209	0.972963	8.72e-05	2.26221	0.517208	0.00122011	3.04966	1	0.000695014	0.787446	0.875386	0.333872	FALSE	FALSE	FALSE	FALSE	FALSE	FALSE
P78324	SIRPA	Tyrosine-protein phosphatase non-receptor type substrate 1	0.95544	0.60473	0.78854	0.93889	TRUE	FALSE	TRUE	TRUE	0.390233	0.959128	0.516798	-0.268133	0.992608	0.689239	0.304378	0.998993	0.719573	-0.658366	0.988651	0.331525	-0.0858546	1	0.919201	0.572511	0.910694	0.525929	FALSE	FALSE	FALSE	FALSE	FALSE	FALSE
Q8IXJ6	SIRT2	NAD-dependent protein deacetylase sirtuin-2	0.99087	0.78889	0.8353	0.94469	TRUE	TRUE	TRUE	TRUE	-0.642787	0.851616	0.0910277	-1.01857	0.967317	0.0208877	-0.102583	0.999052	0.842625	-0.375787	0.989303	0.362949	0.540204	1	0.302787	0.915991	0.728473	0.107059	FALSE	FALSE	FALSE	FALSE	FALSE	FALSE
P63208	SKP1	S-phase kinase-associated protein 1	0.85261	0.74963	0.83965	0	TRUE	FALSE	TRUE	FALSE	-0.903694	0.941446	0.32059	1.0213	0.989571	0.315521	3.65432	0.99584	0.00908487	1.925	0.967389	0.0673544	4.55801	1	0.00184307	2.63301	0.648419	0.0626411	FALSE	FALSE	FALSE	FALSE	FALSE	FALSE
Q9H2X9	SLC12A5	Solute carrier family 12 member 5	0.96863	0.55092	0.8418	0.68551	TRUE	FALSE	TRUE	FALSE	0.299101	0.963739	0.60471	-0.893681	0.986694	0.176068	-1.15802	0.998358	0.166272	-1.19278	0.970057	0.0763914	-1.45712	1	0.086126	-0.264337	0.932425	0.759806	FALSE	FALSE	FALSE	FALSE	FALSE	FALSE
Q9P2U7	SLC17A7	Vesicular glutamate transporter 1	0.86992	0.45661	0.68551	0	TRUE	FALSE	FALSE	FALSE	NA	NA	NA	NA	NA	NA	NA	NA	NA	NA	NA	NA	NA	NA	NA	NA	NA	NA	NA	NA	NA	NA	NA	NA
P43004	SLC1A2	Excitatory amino acid transporter 2	0.68241	0.85634	0.87983	0.68551	FALSE	TRUE	TRUE	FALSE	-0.036523	0.974236	0.937118	0.418072	0.990803	0.423407	-0.900865	0.998398	0.179793	0.454595	0.989705	0.384821	-0.864342	1	0.197216	-1.31894	0.662644	0.0699307	FALSE	FALSE	FALSE	FALSE	FALSE	FALSE
P43003	SLC1A3	Excitatory amino acid transporter 1	0.90008	0.92934	0.90031	0.68551	TRUE	TRUE	TRUE	FALSE	0.235369	0.962239	0.573463	-0.311122	0.991497	0.506425	0.183254	0.999011	0.755879	-0.54649	0.986322	0.249136	-0.052115	1	0.929459	0.494376	0.89678	0.432469	FALSE	FALSE	FALSE	FALSE	FALSE	FALSE
P43007	SLC1A4	Neutral amino acid transporter A	0.97579	0.95218	0.96258	0.68551	TRUE	TRUE	TRUE	FALSE	-0.133076	0.968874	0.737186	-0.449703	0.989585	0.316536	0.916817	0.998153	0.114066	-0.316627	0.991067	0.47757	1.04989	1	0.073287	1.36652	0.537625	0.0313506	FALSE	FALSE	FALSE	FALSE	FALSE	FALSE
Q9UI40	SLC24A2	Sodium/potassium/calcium exchanger 2	0.85739	0.51046	0.68551	0	TRUE	FALSE	FALSE	FALSE	NA	NA	NA	NA	NA	NA	NA	NA	NA	NA	NA	NA	NA	NA	NA	NA	NA	NA	NA	NA	NA	NA	NA	NA
Q02978	SLC25A11	Mitochondrial 2-oxoglutarate/malate carrier protein	0.95493	0.71587	0.86986	0	TRUE	FALSE	TRUE	FALSE	1.18188	0.905044	0.167414	1.2931	0.986699	0.176217	4.21392	0.992739	0.00191127	0.111219	0.994211	0.904985	3.03203	1	0.0176841	2.92081	0.524137	0.029098	FALSE	FALSE	FALSE	FALSE	FALSE	FALSE
O75746	SLC25A12	Electrogenic aspartate/glutamate antiporter SLC25A12, mitochondrial	0.77168	0.61686	0.79646	0.68551	TRUE	FALSE	TRUE	FALSE	0.571782	0.940422	0.313251	0.353644	0.991955	0.573151	-0.303761	0.998983	0.70134	-0.218138	0.993261	0.727468	-0.875543	1	0.276044	-0.657404	0.897545	0.436868	FALSE	FALSE	FALSE	FALSE	FALSE	FALSE
Q00325	SLC25A3	Phosphate carrier protein, mitochondrial	0.95232	0.44351	0.68551	0	TRUE	FALSE	FALSE	FALSE	1.43172	0.920394	0.212359	2.91665	0.972049	0.0299517	4.01201	0.996775	0.0195442	1.48493	0.986205	0.245902	2.58029	1	0.116704	1.09536	0.909675	0.517988	FALSE	FALSE	FALSE	FALSE	FALSE	FALSE
P12235	SLC25A4	ADP/ATP translocase 1	0.95121	0.64368	0.83977	0	TRUE	FALSE	TRUE	FALSE	1.1924	0.904106	0.165205	1.7328	0.981183	0.0763155	3.44795	0.995725	0.00838663	0.5404	0.992009	0.564978	2.25555	1	0.0688297	1.71515	0.809215	0.182333	FALSE	FALSE	FALSE	FALSE	FALSE	FALSE
P05141	SLC25A5	ADP/ATP translocase 2	0.96308	0.71279	0.903	0.68551	TRUE	FALSE	TRUE	FALSE	-0.0585328	0.973286	0.89558	-0.419571	0.990621	0.404589	0.89637	0.998359	0.166536	-0.361038	0.991	0.472147	0.954903	1	0.141934	1.31594	0.645488	0.0612888	FALSE	FALSE	FALSE	FALSE	FALSE	FALSE
P11166	SLC2A1	Solute carrier family 2, facilitated glucose transporter member 1	0.97463	0.7544	0.92297	0	TRUE	TRUE	TRUE	FALSE	0.387704	0.961693	0.562779	0.985101	0.987296	0.196858	3.26228	0.99342	0.00248785	0.597396	0.990385	0.427051	2.87457	1	0.00625909	2.27718	0.546798	0.0329545	FALSE	FALSE	FALSE	FALSE	FALSE	FALSE
P11169;Q8TDB8	SLC2A3;SLC2A14	Solute carrier family 2, facilitated glucose transporter member 3;Solute carrier family 2, facilitated glucose transporter member 14	0.98771	0.805	0.97313	0.68551	TRUE	TRUE	TRUE	FALSE	0.739923	0.898321	0.152609	0.0362513	0.99368	0.948551	0.761313	0.998626	0.291586	-0.703671	0.985169	0.220133	0.0213908	1	0.975985	0.725062	0.877584	0.342204	FALSE	FALSE	FALSE	FALSE	FALSE	FALSE
Q99726	SLC30A3	Zinc transporter 3	0.98619	0.78856	0.68551	0.94397	TRUE	TRUE	FALSE	TRUE	0.740097	0.83937	0.0815438	1.2617	0.957359	0.0114706	-0.0972716	0.999063	0.865815	0.5216	0.986701	0.26009	-0.837369	1	0.157238	-1.35897	0.565171	0.0365257	FALSE	FALSE	FALSE	FALSE	FALSE	FALSE
P08195	SLC3A2	4F2 cell-surface antigen heavy chain	0.88912	0.91368	0.92663	0.99176	TRUE	TRUE	TRUE	TRUE	-0.276591	0.95849	0.50635	-0.531756	0.988664	0.258788	1.48324	0.996754	0.0191588	-0.255164	0.992172	0.582721	1.75983	1	0.0068405	2.015	0.182394	0.00401038	FALSE	FALSE	FALSE	FALSE	FALSE	FALSE
Q8WWI5	SLC44A1	Choline transporter-like protein 1	0.98521	0.84025	0.80918	0	TRUE	TRUE	TRUE	FALSE	0.285804	0.965322	0.640966	1.90129	0.956945	0.0112268	3.79268	0.984702	0.00030331	1.61549	0.939325	0.0274527	3.50688	1	0.000640114	1.89139	0.61851	0.0507156	FALSE	FALSE	FALSE	FALSE	FALSE	FALSE
P02730	SLC4A1	Band 3 anion transport protein	0.93991	0.78527	0.13019	0	TRUE	TRUE	FALSE	FALSE	0.422974	0.965601	0.647739	2.07367	0.978654	0.0564671	3.14187	0.997028	0.0251463	1.6507	0.978132	0.122096	2.7189	1	0.0488219	1.0682	0.898786	0.444168	FALSE	FALSE	FALSE	FALSE	FALSE	FALSE
Q6U841	SLC4A10	Sodium-driven chloride bicarbonate exchanger	0.9094	0.85956	0.75775	0	TRUE	TRUE	TRUE	FALSE	0.43737	0.964263	0.616319	1.11261	0.988706	0.261078	2.59648	0.99755	0.0461674	0.675242	0.991222	0.490365	2.15911	1	0.091882	1.48387	0.852535	0.263819	FALSE	FALSE	FALSE	FALSE	FALSE	FALSE
Q9H1V8	SLC6A17	Sodium-dependent neutral amino acid transporter SLC6A17	0.92126	0.97729	0.74117	0.68551	TRUE	TRUE	FALSE	FALSE	-0.199734	0.96986	0.768326	0.338855	0.992433	0.655401	-0.321927	0.999002	0.737178	0.538589	0.991097	0.479988	-0.122193	1	0.898502	-0.660782	0.909659	0.517864	FALSE	FALSE	FALSE	FALSE	FALSE	FALSE
Q01650	SLC7A5	Large neutral amino acids transporter small subunit 1	0.86379	0.18689	0.68551	0	TRUE	FALSE	FALSE	FALSE	NA	NA	NA	NA	NA	NA	NA	NA	NA	NA	NA	NA	NA	NA	NA	NA	NA	NA	NA	NA	NA	NA	NA	NA
Q9UPR5	SLC8A2	Sodium/calcium exchanger 2	0.98604	0.56025	0.82088	0	TRUE	FALSE	TRUE	FALSE	1.37423	0.823933	0.0717227	2.05962	0.966275	0.0194431	3.96081	0.990818	0.00104028	0.685395	0.990039	0.40469	2.58659	1	0.0202059	1.90119	0.706373	0.0945679	FALSE	FALSE	FALSE	FALSE	FALSE	FALSE
O14745	SLC9A3R1	Na(+)/H(+) exchange regulatory cofactor NHE-RF1	0.96055	0.77734	0.95839	0.932	TRUE	TRUE	TRUE	TRUE	-0.72581	0.912558	0.187129	-0.122146	0.993274	0.838817	-0.73396	0.998693	0.339856	0.603663	0.988414	0.321227	-0.00815019	1	0.991434	-0.611813	0.899916	0.450991	FALSE	FALSE	FALSE	FALSE	FALSE	FALSE
Q15599	SLC9A3R2	Na(+)/H(+) exchange regulatory cofactor NHE-RF2	0.86092	0.48056	0	0	TRUE	FALSE	FALSE	FALSE	NA	NA	NA	NA	NA	NA	NA	NA	NA	NA	NA	NA	NA	NA	NA	NA	NA	NA	NA	NA	NA	NA	NA	NA
P03973	SLPI	Antileukoproteinase	0.8499	0.2832	0.68551	0.94262	TRUE	FALSE	FALSE	TRUE	0.604173	0.945641	0.35404	-0.53021	0.99117	0.464891	-2.00916	0.997397	0.0381006	-1.13438	0.978748	0.127468	-2.61334	1	0.00930124	-1.47895	0.769675	0.137885	FALSE	FALSE	FALSE	FALSE	FALSE	FALSE
P55000	SLURP1	Secreted Ly-6/uPAR-related protein 1	0.45272	0.3122	0.38667	0.91357	FALSE	FALSE	FALSE	TRUE	-1.41626	0.899047	0.154099	-1.39964	0.987508	0.20499	-2.16446	0.998206	0.125248	0.0166225	0.994563	0.987713	-0.7482	1	0.585273	-0.764823	0.918974	0.598835	FALSE	FALSE	FALSE	FALSE	FALSE	FALSE
P60880	SNAP25	Synaptosomal-associated protein 25	0.83968	0.81165	0.97559	0.97608	TRUE	TRUE	TRUE	TRUE	-0.839035	0.814101	0.0664342	-0.578023	0.988388	0.244322	-0.655355	0.998631	0.29491	0.261012	0.992268	0.593494	0.18368	1	0.765866	-0.0773324	0.941095	0.905808	FALSE	FALSE	FALSE	FALSE	FALSE	FALSE
O60641	SNAP91	Clathrin coat assembly protein AP180	0.98929	0.77185	0.93408	0.9204	TRUE	TRUE	TRUE	TRUE	0.396796	0.936533	0.287837	0.337783	0.990726	0.415269	0.660811	0.998482	0.213428	-0.0590124	0.994122	0.885798	0.264016	1	0.612645	0.323028	0.914748	0.559659	FALSE	FALSE	FALSE	FALSE	FALSE	FALSE
P37840	SNCA	Alpha-synuclein	0.92938	0.59158	0.99138	0.93157	TRUE	FALSE	TRUE	TRUE	-0.198573	0.963847	0.607077	0.687616	0.984528	0.122289	0.502031	0.998719	0.361784	0.886189	0.960593	0.0510608	0.700604	1	0.207993	-0.185585	0.931611	0.748105	FALSE	FALSE	FALSE	FALSE	FALSE	FALSE
Q16143	SNCB	Beta-synuclein	0.9866	0.77416	0.81674	0	TRUE	TRUE	TRUE	FALSE	0.0168588	0.975171	0.981261	2.27663	0.9546	0.00998377	4.35664	0.986082	0.000377726	2.25977	0.879545	0.0104539	4.33978	1	0.000392144	2.08001	0.654668	0.0656872	FALSE	FALSE	FALSE	FALSE	FALSE	FALSE
O76070	SNCG	Gamma-synuclein	0.93684	0.79255	0.98065	0.9839	TRUE	TRUE	TRUE	TRUE	-0.530505	0.913223	0.189066	-0.205489	0.99236	0.64202	-0.230705	0.998971	0.679694	0.325016	0.990898	0.464189	0.2998	1	0.592196	-0.0252156	0.944033	0.965982	FALSE	FALSE	FALSE	FALSE	FALSE	FALSE
Q7KZF4	SND1	Staphylococcal nuclease domain-containing protein 1	0.94602	0.75505	0.8379	0	TRUE	TRUE	TRUE	FALSE	-0.134165	0.971693	0.832337	1.72697	0.968962	0.0235119	3.59293	0.989315	0.000712321	1.86114	0.909891	0.0157074	3.7271	1	0.000507466	1.86596	0.646393	0.0617013	FALSE	FALSE	FALSE	FALSE	FALSE	FALSE
P62316	SNRPD2	Small nuclear ribonucleoprotein Sm D2	0.92445	0.62579	0.68551	0	TRUE	FALSE	FALSE	FALSE	1.45365	0.71297	0.0351423	2.255	0.939706	0.00538916	2.96656	0.994501	0.00407665	0.801351	0.987215	0.276264	1.51291	1	0.110986	0.711556	0.902464	0.467029	FALSE	FALSE	FALSE	FALSE	FALSE	FALSE
P62318	SNRPD3	Small nuclear ribonucleoprotein Sm D3	0.89569	0.72102	0.96226	0.9937	TRUE	FALSE	TRUE	TRUE	-0.54856	0.931641	0.260578	-0.105196	0.993296	0.844334	-0.801135	0.998549	0.245864	0.443364	0.990157	0.412119	-0.252575	1	0.709758	-0.695938	0.87673	0.338927	FALSE	FALSE	FALSE	FALSE	FALSE	FALSE
P14678;P63162	SNRPN	Small nuclear ribonucleoprotein-associated proteins B and B';Small nuclear ribonucleoprotein-associated protein N	0.63719	0.83413	0.9489	0.98862	FALSE	TRUE	TRUE	TRUE	NA	NA	NA	NA	NA	NA	NA	NA	NA	NA	NA	NA	NA	NA	NA	NA	NA	NA	NA	NA	NA	NA	NA	NA
Q13884	SNTB1	Beta-1-syntrophin	0.91385	0.79764	0.83283	0	TRUE	TRUE	TRUE	FALSE	NA	NA	NA	NA	NA	NA	NA	NA	NA	NA	NA	NA	NA	NA	NA	NA	NA	NA	NA	NA	NA	NA	NA	NA
P00441	SOD1	Superoxide dismutase [Cu-Zn]	0.6677	0.71836	0.78885	0.9335	FALSE	FALSE	TRUE	TRUE	-0.705387	0.868321	0.107299	-1.00744	0.976286	0.0440077	-1.49809	0.996812	0.020249	-0.302054	0.991604	0.524521	-0.792705	1	0.194765	-0.490651	0.898455	0.442198	FALSE	FALSE	FALSE	FALSE	FALSE	FALSE
P04179	SOD2	Superoxide dismutase [Mn], mitochondrial	0.78678	0.77439	0.97047	0.94593	TRUE	TRUE	TRUE	TRUE	0.556474	0.945136	0.349694	1.31008	0.978929	0.0582358	0.0759484	0.999089	0.927203	0.75361	0.986698	0.25998	-0.480525	1	0.564997	-1.23414	0.802052	0.172754	FALSE	FALSE	FALSE	FALSE	FALSE	FALSE
P08294	SOD3	Extracellular superoxide dismutase [Cu-Zn]	0.85876	0.76684	0.87812	0	TRUE	TRUE	TRUE	FALSE	-1.23247	0.943305	0.334712	-0.82944	0.991858	0.558194	2.85086	0.998193	0.122278	0.403034	0.993549	0.775212	4.08333	1	0.0320767	3.6803	0.651143	0.063941	FALSE	FALSE	FALSE	FALSE	FALSE	FALSE
Q5TF21	SOGA3	Protein SOGA3	0.79594	0.79229	0.68551	0	TRUE	TRUE	FALSE	FALSE	NA	NA	NA	NA	NA	NA	NA	NA	NA	NA	NA	NA	NA	NA	NA	NA	NA	NA	NA	NA	NA	NA	NA	NA
Q9BX66	SORBS1	Sorbin and SH3 domain-containing protein 1	0.80341	0.49037	0	0	TRUE	FALSE	FALSE	FALSE	NA	NA	NA	NA	NA	NA	NA	NA	NA	NA	NA	NA	NA	NA	NA	NA	NA	NA	NA	NA	NA	NA	NA	NA
Q00796	SORD	Sorbitol dehydrogenase	0.97569	0.64485	0.68551	0	TRUE	FALSE	FALSE	FALSE	1.47092	0.891703	0.140097	2.685	0.967627	0.0213471	3.60934	0.996506	0.0153022	1.21408	0.987006	0.269482	2.13842	1	0.129977	0.924336	0.910717	0.526113	FALSE	FALSE	FALSE	FALSE	FALSE	FALSE
Q92673	SORL1	Sortilin-related receptor	0.95358	0.80733	0.73269	0	TRUE	TRUE	FALSE	FALSE	0.0152446	0.975184	0.981853	0.685858	0.990204	0.365595	1.96613	0.997606	0.0496637	0.670613	0.98955	0.376109	1.95088	1	0.0512772	1.28027	0.82855	0.21286	FALSE	FALSE	FALSE	FALSE	FALSE	FALSE
Q99523	SORT1	Sortilin	0.98561	0.66612	0.92183	0	TRUE	FALSE	TRUE	FALSE	0.723763	0.929269	0.248919	0.93262	0.987008	0.186509	4.16179	0.977402	0.00012746	0.208856	0.993472	0.761998	3.43803	1	0.000825484	3.22917	0.125019	0.00229815	FALSE	FALSE	FALSE	FALSE	FALSE	FALSE
Q14515	SPARCL1	SPARC-like protein 1	0.877	0.54568	0.68551	0	TRUE	FALSE	FALSE	FALSE	NA	NA	NA	NA	NA	NA	NA	NA	NA	NA	NA	NA	NA	NA	NA	NA	NA	NA	NA	NA	NA	NA	NA	NA
Q5DT21	SPINK9	Serine protease inhibitor Kazal-type 9	0.80413	0.03171	0.68551	0	TRUE	FALSE	FALSE	FALSE	NA	NA	NA	NA	NA	NA	NA	NA	NA	NA	NA	NA	NA	NA	NA	NA	NA	NA	NA	NA	NA	NA	NA	NA
P35321	SPRR1A	Cornifin-A	0.83136	0.09917	0.68551	0	TRUE	FALSE	FALSE	FALSE	NA	NA	NA	NA	NA	NA	NA	NA	NA	NA	NA	NA	NA	NA	NA	NA	NA	NA	NA	NA	NA	NA	NA	NA
P22528	SPRR1B	Cornifin-B	0.86655	0.26299	0.68551	0.68551	TRUE	FALSE	FALSE	FALSE	1.43736	0.825052	0.0723683	0.865582	0.989601	0.31765	-0.247156	0.999042	0.819164	-0.571773	0.9914	0.505842	-1.68451	1	0.131156	-1.11274	0.876423	0.337763	FALSE	FALSE	FALSE	FALSE	FALSE	FALSE
P22531	SPRR2E	Small proline-rich protein 2E	0.84336	0.28388	0.55359	0.94692	TRUE	FALSE	FALSE	TRUE	0.682318	0.958753	0.51062	-0.997218	0.99049	0.391815	-2.12305	0.998328	0.156947	-1.67954	0.981459	0.156686	-2.80537	1	0.0666613	-1.12584	0.902895	0.469834	FALSE	FALSE	FALSE	FALSE	FALSE	FALSE
Q13813	SPTAN1	Spectrin alpha chain, non-erythrocytic 1	0.88807	0.87104	0.89828	0.9714	TRUE	TRUE	TRUE	TRUE	0.635728	0.697938	0.032474	0.83161	0.961357	0.0142907	1.01331	0.996666	0.0176452	0.195882	0.991676	0.531338	0.377578	1	0.343592	0.181696	0.925094	0.664273	FALSE	FALSE	FALSE	FALSE	FALSE	FALSE
Q01082	SPTBN1	Spectrin beta chain, non-erythrocytic 1	0.48048	0.59624	0.5042	0.9141	FALSE	FALSE	FALSE	TRUE	0.407072	0.924325	0.227328	0.572475	0.985069	0.133268	0.844331	0.997963	0.0833037	0.165403	0.992764	0.65512	0.437259	1	0.355034	0.271856	0.917512	0.584776	FALSE	FALSE	FALSE	FALSE	FALSE	FALSE
O15020	SPTBN2	Spectrin beta chain, non-erythrocytic 2	0.82714	0.847	0.96824	0.90508	TRUE	TRUE	TRUE	TRUE	-0.0995018	0.971923	0.841	0.0848396	0.993427	0.878374	0.466983	0.998858	0.507952	0.184341	0.993339	0.739813	0.566485	1	0.423255	0.382144	0.919959	0.60862	FALSE	FALSE	FALSE	FALSE	FALSE	FALSE
Q13501	SQSTM1	Sequestosome-1	0.97845	0.80602	0.8315	0	TRUE	TRUE	TRUE	FALSE	0.29203	0.967392	0.69426	1.954	0.971171	0.0278775	4.27252	0.988663	0.000616294	1.66197	0.963429	0.0569354	3.98049	1	0.00115891	2.31852	0.612091	0.0486117	FALSE	FALSE	FALSE	FALSE	FALSE	FALSE
P30626	SRI	Sorcin	0.93519	0.70388	0.92737	0.76153	TRUE	FALSE	TRUE	TRUE	-0.104178	0.972633	0.868703	-0.509108	0.991237	0.47301	-0.960863	0.998621	0.288487	-0.40493	0.992029	0.567141	-0.856686	1	0.342418	-0.451755	0.922365	0.633688	FALSE	FALSE	FALSE	FALSE	FALSE	FALSE
P37108	SRP14	Signal recognition particle 14 kDa protein	0.91443	0.53045	0	0	TRUE	FALSE	FALSE	FALSE	NA	NA	NA	NA	NA	NA	NA	NA	NA	NA	NA	NA	NA	NA	NA	NA	NA	NA	NA	NA	NA	NA	NA	NA
P84103	SRSF3	Serine/arginine-rich splicing factor 3	0.84241	0.78774	0.98512	0.98378	TRUE	TRUE	TRUE	TRUE	-0.224019	0.96265	0.581741	0.35262	0.990955	0.439927	0.56049	0.998685	0.334104	0.576639	0.984836	0.212797	0.784509	1	0.181675	0.20787	0.9305	0.732611	FALSE	FALSE	FALSE	FALSE	FALSE	FALSE
P50502	ST13	Hsc70-interacting protein	0.94239	0.66527	0.83428	0.68551	TRUE	FALSE	TRUE	FALSE	0.78614	0.908012	0.174754	-0.239028	0.992688	0.705367	0.079299	0.999086	0.920861	-1.02517	0.977462	0.116682	-0.706841	1	0.380964	0.318327	0.928609	0.707429	FALSE	FALSE	FALSE	FALSE	FALSE	FALSE
P40763	STAT3	Signal transducer and activator of transcription 3	0.89904	0.68551	0	0	TRUE	FALSE	FALSE	FALSE	NA	NA	NA	NA	NA	NA	NA	NA	NA	NA	NA	NA	NA	NA	NA	NA	NA	NA	NA	NA	NA	NA	NA	NA
P31948	STIP1	Stress-induced-phosphoprotein 1	0.99061	0.82023	0.95348	0.68551	TRUE	TRUE	TRUE	FALSE	-0.155789	0.968487	0.725553	0.0539633	0.993555	0.913257	-0.0551487	0.99909	0.929865	0.209753	0.992893	0.672721	0.100641	1	0.872427	-0.109112	0.93917	0.869626	FALSE	FALSE	FALSE	FALSE	FALSE	FALSE
P16949	STMN1	Stathmin	0.93841	0.81026	0.96852	0.958	TRUE	TRUE	TRUE	TRUE	-0.868066	0.773261	0.0499706	-0.637043	0.98696	0.184839	0.202036	0.999	0.733621	0.231024	0.992517	0.623174	1.0701	1	0.0836461	0.839078	0.816261	0.192601	FALSE	FALSE	FALSE	FALSE	FALSE	FALSE
P27105	STOM	Stomatin	0.98028	0.60706	0.83734	0.68551	TRUE	FALSE	TRUE	FALSE	0.500169	0.889328	0.136029	0.104744	0.993002	0.773451	-0.16803	0.99899	0.715247	-0.395426	0.987455	0.284399	-0.668199	1	0.157708	-0.272773	0.916737	0.577549	FALSE	FALSE	FALSE	FALSE	FALSE	FALSE
Q9UJZ1	STOML2	Stomatin-like protein 2, mitochondrial	0.87328	0	0	0	TRUE	FALSE	FALSE	FALSE	NA	NA	NA	NA	NA	NA	NA	NA	NA	NA	NA	NA	NA	NA	NA	NA	NA	NA	NA	NA	NA	NA	NA	NA
Q16623	STX1A	Syntaxin-1A	0.96288	0.64406	0.91009	0.68551	TRUE	FALSE	TRUE	FALSE	-0.47823	0.956948	0.482559	-0.926122	0.988095	0.230133	-1.96065	0.997642	0.0521347	-0.447891	0.991919	0.555574	-1.48242	1	0.133363	-1.03453	0.869987	0.314767	FALSE	FALSE	FALSE	FALSE	FALSE	FALSE
P61266	STX1B	Syntaxin-1B	0.92488	0.72817	0.96484	0.93583	TRUE	FALSE	TRUE	TRUE	-0.769793	0.914496	0.19287	-1.23348	0.980292	0.0683133	-1.17619	0.998342	0.161083	-0.463684	0.991042	0.475549	-0.406396	1	0.619748	0.057288	0.94315	0.94724	FALSE	FALSE	FALSE	FALSE	FALSE	FALSE
O15400	STX7	Syntaxin-7	0.98149	0.76392	0.8959	0.68551	TRUE	TRUE	TRUE	FALSE	0.403876	0.949547	0.391008	0.162911	0.99292	0.754826	-0.23771	0.998992	0.718794	-0.240965	0.992686	0.644687	-0.641586	1	0.336561	-0.40062	0.915722	0.568302	FALSE	FALSE	FALSE	FALSE	FALSE	FALSE
P61764	STXBP1	Syntaxin-binding protein 1	0.4941	0.6765	0.75289	0.38782	FALSE	FALSE	TRUE	FALSE	0.849726	0.866416	0.105205	0.851267	0.98553	0.143757	1.68424	0.997125	0.0278952	0.00154106	0.994603	0.997823	0.834514	1	0.251612	0.832973	0.858511	0.279644	FALSE	FALSE	FALSE	FALSE	FALSE	FALSE
Q9Y2Z0	SUGT1	Protein SGT1 homolog	0.84409	0.37377	0.68551	0	TRUE	FALSE	FALSE	FALSE	NA	NA	NA	NA	NA	NA	NA	NA	NA	NA	NA	NA	NA	NA	NA	NA	NA	NA	NA	NA	NA	NA	NA	NA
Q7L0J3	SV2A	Synaptic vesicle glycoprotein 2A	0.96293	0.57204	0.82273	0.68551	TRUE	FALSE	TRUE	FALSE	0.734869	0.909097	0.177579	0.128667	0.993233	0.828582	1.05459	0.998374	0.171586	-0.606202	0.988248	0.314288	0.319719	1	0.671168	0.925922	0.848488	0.253914	FALSE	FALSE	FALSE	FALSE	FALSE	FALSE
Q7L1I2	SV2B	Synaptic vesicle glycoprotein 2B	0.85031	0.17846	0.68551	0	TRUE	FALSE	FALSE	FALSE	NA	NA	NA	NA	NA	NA	NA	NA	NA	NA	NA	NA	NA	NA	NA	NA	NA	NA	NA	NA	NA	NA	NA	NA
Q8NHG7	SVIP	Small VCP/p97-interacting protein	0.878	0.59818	0	0	TRUE	FALSE	FALSE	FALSE	-0.200034	0.97215	0.849694	3.33487	0.955035	0.0101986	3.33487	0.997348	0.0358936	3.5349	0.840202	0.00701816	3.5349	1	0.0272089	0	0.945566	1	FALSE	FALSE	FALSE	FALSE	FALSE	FALSE
P17600	SYN1	Synapsin-1	0.98055	0.77574	0.96597	0.98731	TRUE	TRUE	TRUE	TRUE	-0.0771919	0.971984	0.843334	0.426768	0.989826	0.334535	-0.57159	0.99865	0.307626	0.50396	0.986592	0.256863	-0.494398	1	0.375801	-0.998358	0.717983	0.100849	FALSE	FALSE	FALSE	FALSE	FALSE	FALSE
Q92777	SYN2	Synapsin-2	0.8802	0.85774	0.94262	0.97942	TRUE	TRUE	TRUE	TRUE	-0.550822	0.883807	0.127308	-0.652618	0.983678	0.107466	-0.29469	0.998891	0.552982	-0.101797	0.993659	0.794647	0.256131	1	0.605651	0.357928	0.90693	0.497541	FALSE	FALSE	FALSE	FALSE	FALSE	FALSE
O14994	SYN3	Synapsin-3	0.98624	0.79201	0.68551	0	TRUE	TRUE	FALSE	FALSE	-0.0295594	0.974599	0.953886	1.56985	0.95845	0.012151	2.13904	0.995585	0.0076294	1.59941	0.882734	0.010855	2.1686	1	0.00696898	0.569192	0.90157	0.461293	FALSE	FALSE	FALSE	FALSE	FALSE	FALSE
O60506	SYNCRIP	Heterogeneous nuclear ribonucleoprotein Q	0.9026	0.72466	0.83111	0	TRUE	FALSE	TRUE	FALSE	-0.0574551	0.974637	0.955629	0.674712	0.991875	0.560801	2.71388	0.997901	0.0756535	0.732167	0.991644	0.528268	2.77134	1	0.070164	2.03917	0.82001	0.198444	FALSE	FALSE	FALSE	FALSE	FALSE	FALSE
Q96PV0	SYNGAP1	Ras/Rap GTPase-activating protein SynGAP	0.95423	0.273	0.68551	0	TRUE	FALSE	FALSE	FALSE	2.126	0.0545685	0.000585935	2.12813	0.890424	0.00154942	2.71013	0.991964	0.00146455	0.0021349	0.9946	0.997063	0.584132	1	0.430032	0.581997	0.901058	0.458061	FALSE	FALSE	FALSE	FALSE	FALSE	FALSE
O43759	SYNGR1	Synaptogyrin-1	0.95513	0.7415	0.93911	0.68551	TRUE	FALSE	TRUE	FALSE	-0.597592	0.939623	0.307718	-0.672979	0.98941	0.30432	-0.893872	0.99861	0.281469	-0.0753871	0.99422	0.907036	-0.29628	1	0.71718	-0.220893	0.934997	0.798835	FALSE	FALSE	FALSE	FALSE	FALSE	FALSE
O43761	SYNGR3	Synaptogyrin-3	0.91224	0.71887	0.9753	0.68552	TRUE	FALSE	TRUE	FALSE	-0.232264	0.969398	0.753453	-1.37326	0.983763	0.108834	-1.08428	0.998648	0.306316	-1.14099	0.982954	0.178035	-0.852016	1	0.41889	0.288978	0.934713	0.794374	FALSE	FALSE	FALSE	FALSE	FALSE	FALSE
O43426	SYNJ1	Synaptojanin-1	0.9665	0.81285	0.83147	0	TRUE	TRUE	TRUE	FALSE	0.132252	0.972321	0.856365	1.58757	0.979765	0.0641334	3.91219	0.99127	0.00118281	1.45532	0.972647	0.0873587	3.77994	1	0.00158133	2.32462	0.600556	0.0451477	FALSE	FALSE	FALSE	FALSE	FALSE	FALSE
Q8N3V7	SYNPO	Synaptopodin	0.89816	0.59841	0.68551	0	TRUE	FALSE	FALSE	FALSE	2.11325	0.733933	0.0394374	3.02925	0.95595	0.0106725	3.79481	0.996138	0.0113218	0.916004	0.989976	0.400778	1.68157	1	0.227628	0.765564	0.918937	0.598471	FALSE	FALSE	FALSE	FALSE	FALSE	FALSE
P08247	SYP	Synaptophysin	0.89467	0.60044	0.92494	0	TRUE	FALSE	TRUE	FALSE	0.342946	0.970365	0.785126	-0.0747861	0.993711	0.957547	3.60951	0.997669	0.0540932	-0.417732	0.993499	0.76648	3.26656	1	0.0786164	3.68429	0.648851	0.0628443	FALSE	FALSE	FALSE	FALSE	FALSE	FALSE
P21579	SYT1	Synaptotagmin-1	0.98535	0.75331	0.96837	0.94186	TRUE	TRUE	TRUE	TRUE	-0.146466	0.969211	0.747597	-0.461914	0.99024	0.368782	0.628265	0.998686	0.33468	-0.315448	0.991734	0.536909	0.774731	1	0.237297	1.09018	0.75063	0.122177	FALSE	FALSE	FALSE	FALSE	FALSE	FALSE
O43581	SYT7	Synaptotagmin-7	0.97142	0.72071	0.68551	0	TRUE	FALSE	FALSE	FALSE	1.89557	0.718811	0.0362664	3.17638	0.92333	0.00324044	4.29155	0.992776	0.00193736	1.28081	0.983581	0.188484	2.39598	1	0.0582945	1.11518	0.887995	0.386792	FALSE	FALSE	FALSE	FALSE	FALSE	FALSE
Q01995	TAGLN	Transgelin	0.6915	0.93755	0.80229	0	FALSE	TRUE	TRUE	FALSE	0.372139	0.96708	0.68576	1.07696	0.989364	0.301144	3.11852	0.997036	0.0253485	0.704825	0.991275	0.494915	2.74639	1	0.0456633	2.04156	0.782075	0.149831	FALSE	FALSE	FALSE	FALSE	FALSE	FALSE
Q9UI15	TAGLN3	Transgelin-3	0.97726	0.75151	0.92906	0.68551	TRUE	TRUE	TRUE	FALSE	0.399001	0.951837	0.415913	-0.0253999	0.993728	0.962709	-0.326188	0.998945	0.636071	-0.424401	0.990551	0.43855	-0.725189	1	0.298648	-0.300788	0.926463	0.68055	FALSE	FALSE	FALSE	FALSE	FALSE	FALSE
P37837	TALDO1	Transaldolase	0.82315	0.82269	0.68213	0.96728	TRUE	TRUE	FALSE	TRUE	0.448985	0.943454	0.335883	0.407685	0.990887	0.43245	0.324728	0.998935	0.619254	-0.0412994	0.994348	0.93607	-0.124256	1	0.848756	-0.082957	0.941023	0.904423	FALSE	FALSE	FALSE	FALSE	FALSE	FALSE
Q4KMP7	TBC1D10B	TBC1 domain family member 10B	0.7916	0.68551	0	0	TRUE	FALSE	FALSE	FALSE	NA	NA	NA	NA	NA	NA	NA	NA	NA	NA	NA	NA	NA	NA	NA	NA	NA	NA	NA	NA	NA	NA	NA	NA
O75347	TBCA	Tubulin-specific chaperone A	0.93806	0.81879	0.97476	0.98051	TRUE	TRUE	TRUE	TRUE	-0.56552	0.939517	0.306995	-0.4596	0.991084	0.454647	-0.584358	0.998811	0.452356	0.10592	0.994009	0.862175	-0.0188378	1	0.980518	-0.124758	0.939673	0.878851	FALSE	FALSE	FALSE	FALSE	FALSE	FALSE
Q99426	TBCB	Tubulin-folding cofactor B	0.7604	0.74217	0.68551	0	TRUE	FALSE	FALSE	FALSE	1.75205	0.546249	0.0163109	3.62079	0.61827	0.000114396	4.35525	0.981348	0.000193783	1.86874	0.926875	0.0210747	2.6032	1	0.0122583	0.734461	0.902752	0.468905	FALSE	FALSE	FALSE	FALSE	FALSE	FALSE
P17987	TCP1	T-complex protein 1 subunit alpha	0.89096	0.82688	0.97813	0.99027	TRUE	TRUE	TRUE	TRUE	-0.195966	0.96267	0.582152	-0.0216355	0.993707	0.956484	-0.128644	0.999032	0.797739	0.17433	0.992808	0.661023	0.0673212	1	0.893243	-0.107009	0.937532	0.840657	FALSE	FALSE	FALSE	FALSE	FALSE	FALSE
P02787	TF	Serotransferrin	0.75875	0.81778	0.98547	0.97446	TRUE	TRUE	TRUE	TRUE	-0.149709	0.965493	0.645083	0.238522	0.991544	0.512871	-0.363962	0.998792	0.431131	0.388231	0.987656	0.291516	-0.214253	1	0.641159	-0.602484	0.834959	0.224814	FALSE	FALSE	FALSE	FALSE	FALSE	FALSE
O43548	TGM5	Protein-glutamine gamma-glutamyltransferase 5	0.54016	0.60046	0.08915	0.95834	FALSE	FALSE	FALSE	TRUE	-0.0322274	0.974099	0.930961	-0.0908532	0.993228	0.827173	-1.22	0.997197	0.0301832	-0.0586258	0.994132	0.887918	-1.18778	1	0.0342481	-1.12915	0.630113	0.0548878	FALSE	FALSE	FALSE	FALSE	FALSE	FALSE
P07996	THBS1	Thrombospondin-1	0.97125	0.83463	0.90372	0	TRUE	TRUE	TRUE	FALSE	0.0478853	0.974291	0.93964	0.756587	0.989226	0.292114	4.0803	0.981836	0.000205559	0.708702	0.988452	0.322821	4.03241	1	0.00023175	3.32371	0.122994	0.00224936	FALSE	FALSE	FALSE	FALSE	FALSE	FALSE
P04216	THY1	Thy-1 membrane glycoprotein	0.82525	0.85531	0.90574	0.96996	TRUE	TRUE	TRUE	TRUE	-0.520011	0.942812	0.330861	-0.649283	0.989017	0.279054	-0.753928	0.998666	0.31915	-0.129273	0.99383	0.82667	-0.233918	1	0.75426	-0.104645	0.940525	0.894845	FALSE	FALSE	FALSE	FALSE	FALSE	FALSE
Q3LXA3	TKFC	Triokinase/FMN cyclase	0.92229	0.69038	0.68551	0	TRUE	FALSE	FALSE	FALSE	NA	NA	NA	NA	NA	NA	NA	NA	NA	NA	NA	NA	NA	NA	NA	NA	NA	NA	NA	NA	NA	NA	NA	NA
P29401	TKT	Transketolase	0.82019	0.84133	0.73652	0.39473	TRUE	TRUE	FALSE	FALSE	0.074961	0.970762	0.798759	0.139755	0.992516	0.671233	0.683212	0.998146	0.11259	0.0647941	0.993918	0.843685	0.608251	1	0.154841	0.543457	0.836074	0.227003	FALSE	FALSE	FALSE	FALSE	FALSE	FALSE
Q9Y490	TLN1	Talin-1	0.39528	0.7325	0.83951	0	FALSE	FALSE	TRUE	FALSE	0.501372	0.94645	0.36119	1.19333	0.979388	0.0613728	2.45867	0.994659	0.00442478	0.691958	0.986782	0.262536	1.9573	1	0.018561	1.26534	0.763269	0.132276	FALSE	FALSE	FALSE	FALSE	FALSE	FALSE
Q9Y4G6	TLN2	Talin-2	0.97592	0.89483	0	0	TRUE	TRUE	FALSE	FALSE	1.42801	0.792318	0.0567338	4.06726	0.507164	6.08e-05	4.06726	0.989007	0.000664467	2.63925	0.738547	0.00342529	2.63925	1	0.0158923	0	0.945566	1	FALSE	FALSE	FALSE	FALSE	FALSE	FALSE
P49755	TMED10	Transmembrane emp24 domain-containing protein 10	0.94275	0.44206	0.68551	0	TRUE	FALSE	FALSE	FALSE	1.30763	0.921271	0.215547	1.675	0.986107	0.15862	3.15609	0.997473	0.0418105	0.367371	0.993406	0.75079	1.84846	1	0.21574	1.48109	0.878375	0.345291	FALSE	FALSE	FALSE	FALSE	FALSE	FALSE
Q8TC26	TMEM163	Transmembrane protein 163	0.86923	0.75469	0.68551	0	TRUE	TRUE	FALSE	FALSE	NA	NA	NA	NA	NA	NA	NA	NA	NA	NA	NA	NA	NA	NA	NA	NA	NA	NA	NA	NA	NA	NA	NA	NA
Q8WUH6	TMEM263	Transmembrane protein 263	0.44321	0.55343	0.56471	0.99208	FALSE	FALSE	FALSE	TRUE	0.180042	0.964887	0.630645	0.125827	0.992958	0.763297	-0.249203	0.998947	0.637884	-0.0542147	0.994173	0.896651	-0.429244	1	0.420355	-0.37503	0.908034	0.505599	FALSE	FALSE	FALSE	FALSE	FALSE	FALSE
Q9NV96	TMEM30A	Cell cycle control protein 50A	0.86914	0.79443	0.68551	0	TRUE	TRUE	FALSE	FALSE	NA	NA	NA	NA	NA	NA	NA	NA	NA	NA	NA	NA	NA	NA	NA	NA	NA	NA	NA	NA	NA	NA	NA	NA
Q9NZR1	TMOD2	Tropomodulin-2	0.97777	0.84856	0.95828	0.86415	TRUE	TRUE	TRUE	TRUE	-0.828163	0.846651	0.0869716	-1.28287	0.967982	0.0218934	-0.463174	0.998838	0.483355	-0.454706	0.989723	0.385844	0.364989	1	0.579731	0.819695	0.845888	0.247863	FALSE	FALSE	FALSE	FALSE	FALSE	FALSE
P62328	TMSB4X	Thymosin beta-4	0.9261	0.47856	0.68551	0.98004	TRUE	FALSE	FALSE	TRUE	0.725203	0.939984	0.310198	0.0832934	0.993564	0.915769	-0.122513	0.999078	0.902124	-0.641909	0.990268	0.419243	-0.847716	1	0.399442	-0.205807	0.937819	0.845619	FALSE	FALSE	FALSE	FALSE	FALSE	FALSE
P24821	TNC	Tenascin	0.76154	0.8919	0.8048	0.96767	TRUE	TRUE	TRUE	TRUE	-0.733135	0.777332	0.0513049	-0.417942	0.989366	0.30133	0.321885	0.998871	0.525244	0.315193	0.990468	0.432739	1.05502	1	0.0477415	0.739827	0.805516	0.177285	FALSE	FALSE	FALSE	FALSE	FALSE	FALSE
Q92752	TNR	Tenascin-R	0.78287	0.9475	0.83956	0.99232	TRUE	TRUE	TRUE	TRUE	0.035337	0.974123	0.932036	0.587389	0.987746	0.214716	1.15392	0.997756	0.0610714	0.552052	0.986076	0.242426	1.11858	1	0.0686494	0.56653	0.883742	0.367478	FALSE	FALSE	FALSE	FALSE	FALSE	FALSE
Q9H0E2	TOLLIP	Toll-interacting protein	0.81879	0.70913	0.97354	0.98128	TRUE	FALSE	TRUE	TRUE	0.0535855	0.973327	0.897314	0.423567	0.990219	0.366957	-0.346991	0.998894	0.55641	0.369981	0.99042	0.429427	-0.400576	1	0.49782	-0.770557	0.835321	0.225521	FALSE	FALSE	FALSE	FALSE	FALSE	FALSE
O60784	TOM1	Target of Myb1 membrane trafficking protein	0.93172	0.79863	0.83216	0	TRUE	TRUE	TRUE	FALSE	0.0925977	0.973593	0.908683	0.938041	0.989432	0.305767	3.20525	0.996056	0.0106394	0.845443	0.98914	0.354668	3.11265	1	0.0126969	2.26721	0.669002	0.0736367	FALSE	FALSE	FALSE	FALSE	FALSE	FALSE
Q6ZVM7	TOM1L2	TOM1-like protein 2	0.98094	0.62083	0.68551	0.68551	TRUE	FALSE	FALSE	FALSE	0.751104	0.858058	0.0967797	-0.333431	0.991416	0.495646	-0.942084	0.998258	0.137638	-1.08453	0.95002	0.0362165	-1.69319	1	0.0119858	-0.608653	0.881164	0.356533	FALSE	FALSE	FALSE	FALSE	FALSE	FALSE
P55327	TPD52	Tumor protein D52	0.94984	0.67986	0.68551	0	TRUE	FALSE	FALSE	FALSE	0.993316	0.922695	0.220904	1.9555	0.974878	0.0384243	2.63995	0.99714	0.0283269	0.962183	0.987512	0.286395	1.64663	1	0.154428	0.684451	0.91563	0.56748	FALSE	FALSE	FALSE	FALSE	FALSE	FALSE
O43399	TPD52L2	Tumor protein D54	0.89032	0.60986	0.68551	0	TRUE	FALSE	FALSE	FALSE	-0.182287	0.972128	0.848875	1.37165	0.987622	0.209557	2.42763	0.997978	0.0852491	1.55394	0.981535	0.157662	2.60992	1	0.0659146	1.05598	0.902138	0.464928	FALSE	FALSE	FALSE	FALSE	FALSE	FALSE
P60174	TPI1	Triosephosphate isomerase	0.82611	0.85915	0.88454	0.99195	TRUE	TRUE	TRUE	TRUE	0.207903	0.959955	0.53089	0.589186	0.984545	0.122608	0.389529	0.99877	0.408351	0.381284	0.988102	0.308413	0.181627	1	0.697699	-0.199657	0.927016	0.687312	FALSE	FALSE	FALSE	FALSE	FALSE	FALSE
P09493	TPM1	Tropomyosin alpha-1 chain	0.93704	0.49658	0.7772	0.68551	TRUE	FALSE	TRUE	FALSE	0.90102	0.86179	0.100396	0.302576	0.992175	0.609379	0.584479	0.998798	0.437434	-0.598444	0.98832	0.31728	-0.316542	1	0.672235	0.281902	0.929732	0.722215	FALSE	FALSE	FALSE	FALSE	FALSE	FALSE
P07951	TPM2	Tropomyosin beta chain	0.95835	0.50859	0.89196	0.68551	TRUE	FALSE	TRUE	FALSE	0.378598	0.958334	0.503857	-0.286563	0.992403	0.649781	-1.01308	0.998481	0.213107	-0.665161	0.987829	0.297901	-1.39167	1	0.0930689	-0.726513	0.889564	0.394348	FALSE	FALSE	FALSE	FALSE	FALSE	FALSE
P06753	TPM3	Tropomyosin alpha-3 chain	0.60128	0.79075	0.69942	0.97427	FALSE	TRUE	FALSE	TRUE	-0.604828	0.954731	0.451533	-0.921686	0.989465	0.308062	-1.5102	0.998428	0.190949	-0.316858	0.993231	0.722608	-0.905373	1	0.425957	-0.588515	0.921424	0.62369	FALSE	FALSE	FALSE	FALSE	FALSE	FALSE
P67936	TPM4	Tropomyosin alpha-4 chain	0.94095	0.72259	0.899	0.98347	TRUE	FALSE	TRUE	TRUE	-0.184032	0.968557	0.727649	-0.0239867	0.993745	0.967561	-0.495774	0.998859	0.508964	0.160045	0.993612	0.786336	-0.311742	1	0.676799	-0.471787	0.913981	0.553007	FALSE	FALSE	FALSE	FALSE	FALSE	FALSE
O14773	TPP1	Tripeptidyl-peptidase 1	0.87419	0.82216	0.87935	0.99399	TRUE	TRUE	TRUE	TRUE	-0.58421	0.892266	0.141093	-0.348149	0.990797	0.422728	-0.0229507	0.999104	0.96637	0.236061	0.992192	0.5849	0.561259	1	0.309572	0.325199	0.916456	0.574964	FALSE	FALSE	FALSE	FALSE	FALSE	FALSE
O94811	TPPP	Tubulin polymerization-promoting protein	0.90224	0.81776	0.78429	0.98372	TRUE	TRUE	TRUE	TRUE	0.309878	0.964755	0.627558	1.6076	0.973597	0.0342015	1.2323	0.998404	0.182001	1.29772	0.971187	0.0808678	0.922424	1	0.312533	-0.375298	0.927628	0.694925	FALSE	FALSE	FALSE	FALSE	FALSE	FALSE
Q9BW30	TPPP3	Tubulin polymerization-promoting protein family member 3	0.90621	0.76642	0.99035	0.8761	TRUE	TRUE	TRUE	TRUE	-0.280653	0.962818	0.585187	-0.744612	0.987474	0.203649	-0.372143	0.998928	0.60863	-0.463958	0.990308	0.421913	-0.0914896	1	0.89948	0.372469	0.921912	0.628837	FALSE	FALSE	FALSE	FALSE	FALSE	FALSE
P13693	TPT1	Translationally-controlled tumor protein	0.97529	0.71259	0.68551	0.98999	TRUE	FALSE	FALSE	TRUE	0.49679	0.935222	0.280066	0.730359	0.986167	0.160281	-0.892998	0.998381	0.173942	0.233569	0.99269	0.645212	-1.38979	1	0.0407893	-1.62336	0.503417	0.0259281	FALSE	FALSE	FALSE	FALSE	FALSE	FALSE
Q9C040	TRIM2	Tripartite motif-containing protein 2	0.98161	0.60015	0.82521	0	TRUE	FALSE	TRUE	FALSE	0.859706	0.906858	0.171836	1.1197	0.984111	0.114679	2.73665	0.994849	0.00490109	0.259992	0.993115	0.704874	1.87695	1	0.0413158	1.61695	0.699694	0.0912065	FALSE	FALSE	FALSE	FALSE	FALSE	FALSE
O75382	TRIM3	Tripartite motif-containing protein 3	0.88876	0.68551	0	0	TRUE	FALSE	FALSE	FALSE	NA	NA	NA	NA	NA	NA	NA	NA	NA	NA	NA	NA	NA	NA	NA	NA	NA	NA	NA	NA	NA	NA	NA	NA
Q15631	TSN	Translin	0.90001	0.93793	0.68551	0	TRUE	TRUE	FALSE	FALSE	-0.112468	0.973699	0.91325	2.17178	0.980758	0.0723373	3.01156	0.997623	0.050789	2.28425	0.964676	0.0598999	3.12403	1	0.0435342	0.839781	0.917967	0.589088	FALSE	FALSE	FALSE	FALSE	FALSE	FALSE
P02766	TTR	Transthyretin	0.64841	0.58753	0.8133	0.84383	FALSE	FALSE	TRUE	TRUE	-0.0156198	0.975041	0.974892	0.156284	0.993024	0.778437	-1.72647	0.996919	0.0224925	0.171904	0.993443	0.757014	-1.71085	1	0.0235727	-1.88275	0.452243	0.0194215	FALSE	FALSE	FALSE	FALSE	FALSE	FALSE
P0DPH7;P0DPH8	TUBA3C;TUBA3D	Tubulin alpha-3C chain;Tubulin alpha-3D chain	0.6939	0.86824	0.55922	0.95583	FALSE	TRUE	FALSE	TRUE	0.984643	0.915756	0.196767	1.78892	0.976019	0.0428641	2.51734	0.997063	0.0260881	0.804276	0.988846	0.340443	1.5327	1	0.157358	0.728421	0.909545	0.516985	FALSE	FALSE	FALSE	FALSE	FALSE	FALSE
P68366	TUBA4A	Tubulin alpha-4A chain	0.85232	0.7909	0.9904	0.97978	TRUE	TRUE	TRUE	TRUE	-0.596195	0.875816	0.116263	-0.172185	0.992536	0.675071	-0.266886	0.998928	0.60792	0.42401	0.988088	0.307856	0.329309	1	0.5275	-0.0947014	0.938819	0.863278	FALSE	FALSE	FALSE	FALSE	FALSE	FALSE
Q9NY65	TUBA8	Tubulin alpha-8 chain	0.96121	0.70507	0.82419	0	TRUE	FALSE	TRUE	FALSE	0.161213	0.971034	0.808333	1.85999	0.967001	0.0204326	3.69428	0.990047	0.000849228	1.69878	0.945735	0.0321905	3.53306	1	0.00125351	1.83429	0.676041	0.0781236	FALSE	FALSE	FALSE	FALSE	FALSE	FALSE
P07437	TUBB	Tubulin beta chain	0.86442	0.89569	0.97993	0.98976	TRUE	TRUE	TRUE	TRUE	0.720744	0.897418	0.150792	1.71375	0.937725	0.00502929	1.54098	0.997345	0.0357741	0.993004	0.971191	0.080885	0.820234	1	0.242883	-0.17277	0.935894	0.813235	FALSE	FALSE	FALSE	FALSE	FALSE	FALSE
Q13885	TUBB2A	Tubulin beta-2A chain	0.78762	0.88896	0.90364	0.97988	TRUE	TRUE	TRUE	TRUE	-0.108827	0.971394	0.821316	0.235665	0.99247	0.66241	0.0450545	0.999097	0.94725	0.344493	0.991605	0.524599	0.153882	1	0.821343	-0.190611	0.934564	0.792049	FALSE	FALSE	FALSE	FALSE	FALSE	FALSE
Q9BVA1	TUBB2B	Tubulin beta-2B chain	0.96661	0.49656	0.83174	0	TRUE	FALSE	TRUE	FALSE	1.07586	0.925647	0.232773	1.46466	0.985782	0.149997	3.39439	0.996311	0.0129885	0.388797	0.993045	0.694537	2.31853	1	0.0760915	1.92973	0.788847	0.157042	FALSE	FALSE	FALSE	FALSE	FALSE	FALSE
Q13509	TUBB3	Tubulin beta-3 chain	0.84606	0.90366	0.83523	0.92263	TRUE	TRUE	TRUE	TRUE	0.366289	0.958026	0.49899	0.863405	0.986258	0.162879	1.78763	0.997143	0.0284268	0.497116	0.990175	0.413231	1.42134	1	0.0744192	0.924222	0.851362	0.260885	FALSE	FALSE	FALSE	FALSE	FALSE	FALSE
P04350	TUBB4A	Tubulin beta-4A chain	0.86463	0.86039	0.93734	0.99377	TRUE	TRUE	TRUE	TRUE	0.219639	0.962182	0.57234	1.04355	0.969766	0.0249753	1.4131	0.996652	0.0174195	0.823913	0.968069	0.0694759	1.19347	1	0.0402315	0.369552	0.910829	0.527001	FALSE	FALSE	FALSE	FALSE	FALSE	FALSE
P68371	TUBB4B	Tubulin beta-4B chain	0.81468	0.82692	0.84624	0.86075	TRUE	TRUE	TRUE	TRUE	0.672664	0.813541	0.0661523	1.1024	0.955066	0.0102141	1.16263	0.997127	0.0279296	0.42974	0.987282	0.278502	0.489962	1	0.327197	0.060222	0.941227	0.90839	FALSE	FALSE	FALSE	FALSE	FALSE	FALSE
Q9BUF5	TUBB6	Tubulin beta-6 chain	0.73102	0.86903	0.7704	0.9667	FALSE	TRUE	TRUE	TRUE	1.16846	0.44665	0.0103585	1.63191	0.906716	0.00215586	2.02794	0.993412	0.00247989	0.463452	0.988473	0.32374	0.859477	1	0.154131	0.396025	0.910744	0.526324	FALSE	FALSE	FALSE	FALSE	FALSE	FALSE
Q9BRA2	TXNDC17	Thioredoxin domain-containing protein 17	0.9086	0.629	0.82138	0.68551	TRUE	FALSE	TRUE	FALSE	-0.218196	0.964804	0.628701	-0.856096	0.983273	0.1013	-0.821775	0.998466	0.206554	-0.6379	0.984917	0.214537	-0.603579	1	0.348631	0.0343206	0.943727	0.959427	FALSE	FALSE	FALSE	FALSE	FALSE	FALSE
O43396	TXNL1	Thioredoxin-like protein 1	0.8898	0.76392	0.90444	0.68551	TRUE	TRUE	TRUE	FALSE	0.756351	0.91064	0.18173	0.211755	0.992815	0.732032	-0.484702	0.99888	0.537007	-0.544597	0.98967	0.382845	-1.24105	1	0.124378	-0.696457	0.891704	0.405053	FALSE	FALSE	FALSE	FALSE	FALSE	FALSE
Q16881	TXNRD1	Thioredoxin reductase 1, cytoplasmic	0.86645	0.59718	0.68551	0	TRUE	FALSE	FALSE	FALSE	0.0258875	0.975056	0.975647	1.62192	0.983168	0.0997897	2.4681	0.99763	0.0512992	1.59603	0.975807	0.104917	2.44221	1	0.0535404	0.84618	0.908427	0.508521	FALSE	FALSE	FALSE	FALSE	FALSE	FALSE
P19971	TYMP	Thymidine phosphorylase	0.57766	0.48628	0.83906	0.68551	FALSE	FALSE	TRUE	FALSE	-0.0609292	0.973505	0.904867	-0.66805	0.988498	0.249933	-0.208739	0.999019	0.772397	-0.607121	0.98773	0.294218	-0.147809	1	0.837623	0.459311	0.913631	0.550015	FALSE	FALSE	FALSE	FALSE	FALSE	FALSE
P22314	UBA1	Ubiquitin-like modifier-activating enzyme 1	0.98927	0.8175	0.98948	0.99361	TRUE	TRUE	TRUE	TRUE	-0.422343	0.926547	0.236616	0.116905	0.992967	0.765316	0.576437	0.998561	0.252751	0.539247	0.983017	0.179031	0.99878	1	0.0554446	0.459533	0.88788	0.386248	FALSE	FALSE	FALSE	FALSE	FALSE	FALSE
P0CG47;P0CG48;P62979;P62987	UBB	Polyubiquitin-B;Polyubiquitin-C;Ubiquitin-40S ribosomal protein S27a;Ubiquitin-60S ribosomal protein L40	0.60041	0.78148	0.79488	0.99277	FALSE	TRUE	TRUE	TRUE	NA	NA	NA	NA	NA	NA	NA	NA	NA	NA	NA	NA	NA	NA	NA	NA	NA	NA	NA	NA	NA	NA	NA	NA
P61088	UBE2N	Ubiquitin-conjugating enzyme E2 N	0.98321	0.80774	0.9909	0.95444	TRUE	TRUE	TRUE	TRUE	-0.153037	0.964993	0.633131	-0.194217	0.992049	0.588291	0.446338	0.99868	0.329869	-0.0411796	0.994226	0.908264	0.599375	1	0.195333	0.640554	0.815945	0.192121	FALSE	FALSE	FALSE	FALSE	FALSE	FALSE
Q13404	UBE2V1	Ubiquitin-conjugating enzyme E2 variant 1	0.95066	0.76257	0.98012	0.99325	TRUE	TRUE	TRUE	TRUE	0.561718	0.93579	0.283387	0.0738578	0.9935	0.897989	1.13802	0.998229	0.130532	-0.48786	0.98999	0.401669	0.576299	1	0.432936	1.06416	0.807154	0.179493	FALSE	FALSE	FALSE	FALSE	FALSE	FALSE
Q15819	UBE2V2	Ubiquitin-conjugating enzyme E2 variant 2	0.89126	0.55129	0.79572	0.68551	TRUE	FALSE	TRUE	FALSE	0.346098	0.965817	0.653068	0.395151	0.992383	0.646251	0.258086	0.999038	0.812263	0.049053	0.994427	0.954431	-0.0880113	1	0.935402	-0.137064	0.941068	0.905281	FALSE	FALSE	FALSE	FALSE	FALSE	FALSE
Q9UHD9	UBQLN2	Ubiquilin-2	0.79691	0	0	0	TRUE	FALSE	FALSE	FALSE	NA	NA	NA	NA	NA	NA	NA	NA	NA	NA	NA	NA	NA	NA	NA	NA	NA	NA	NA	NA	NA	NA	NA	NA
P09936	UCHL1	Ubiquitin carboxyl-terminal hydrolase isozyme L1	0.88498	0.775	0.81175	0.94514	TRUE	TRUE	TRUE	TRUE	0.272538	0.966537	0.671369	0.128144	0.99335	0.858095	1.02112	0.998588	0.26809	-0.144394	0.993901	0.840348	0.748581	1	0.413165	0.892975	0.881653	0.358568	FALSE	FALSE	FALSE	FALSE	FALSE	FALSE
Q16851	UGP2	UTP--glucose-1-phosphate uridylyltransferase	0.98602	0.82677	0.96266	0.68551	TRUE	TRUE	TRUE	FALSE	-0.0387113	0.973862	0.920392	-0.407863	0.990046	0.352126	-0.544487	0.998676	0.326754	-0.369152	0.989941	0.398672	-0.505775	1	0.361443	-0.136624	0.935954	0.814213	FALSE	FALSE	FALSE	FALSE	FALSE	FALSE
P14927	UQCRB	Cytochrome b-c1 complex subunit 7	0.8623	0	0	0	TRUE	FALSE	FALSE	FALSE	NA	NA	NA	NA	NA	NA	NA	NA	NA	NA	NA	NA	NA	NA	NA	NA	NA	NA	NA	NA	NA	NA	NA	NA
P31930	UQCRC1	Cytochrome b-c1 complex subunit 1, mitochondrial	0.96583	0.61003	0.91632	0.83267	TRUE	FALSE	TRUE	TRUE	0.766369	0.872257	0.111855	-0.272464	0.992129	0.601592	-1.08039	0.998147	0.112912	-1.03883	0.963767	0.0577119	-1.84676	1	0.0106264	-0.807931	0.849105	0.255384	FALSE	FALSE	FALSE	FALSE	FALSE	FALSE
P22695	UQCRC2	Cytochrome b-c1 complex subunit 2, mitochondrial	0.98191	0.79654	0.80115	0	TRUE	TRUE	TRUE	FALSE	0.129013	0.96985	0.767972	0.60801	0.987933	0.22278	2.56156	0.987875	0.000523869	0.478997	0.988684	0.333035	2.43255	1	0.000840785	1.95355	0.264679	0.0072545	FALSE	FALSE	FALSE	FALSE	FALSE	FALSE
P0C7P4;P47985	UQCRFS1	Putative cytochrome b-c1 complex subunit Rieske-like protein 1;Cytochrome b-c1 complex subunit Rieske, mitochondrial	0.50615	0.69335	0.90163	0.68552	FALSE	FALSE	TRUE	FALSE	NA	NA	NA	NA	NA	NA	NA	NA	NA	NA	NA	NA	NA	NA	NA	NA	NA	NA	NA	NA	NA	NA	NA	NA
P07919	UQCRH	Cytochrome b-c1 complex subunit 6, mitochondrial	0.90946	0.2797	0.68551	0	TRUE	FALSE	FALSE	FALSE	NA	NA	NA	NA	NA	NA	NA	NA	NA	NA	NA	NA	NA	NA	NA	NA	NA	NA	NA	NA	NA	NA	NA	NA
P54578	USP14	Ubiquitin carboxyl-terminal hydrolase 14	0.98214	0.85935	0.82842	0	TRUE	TRUE	TRUE	FALSE	0.470088	0.961922	0.567209	1.85564	0.978297	0.0542791	3.76057	0.994452	0.00397546	1.38555	0.980186	0.141692	3.29049	1	0.00980854	1.90493	0.76372	0.132659	FALSE	FALSE	FALSE	FALSE	FALSE	FALSE
P45974	USP5	Ubiquitin carboxyl-terminal hydrolase 5	0.97663	0.59467	0.68551	0	TRUE	FALSE	FALSE	FALSE	0.841063	0.868373	0.107357	3.41208	0.250003	8.05e-06	4.24047	0.916986	1e-05	2.57102	0.30515	0.000203061	3.3994	1	0.00012804	0.828384	0.858828	0.280526	FALSE	FALSE	FALSE	FALSE	FALSE	FALSE
Q93009	USP7	Ubiquitin carboxyl-terminal hydrolase 7	0.91999	0.69179	0	0	TRUE	FALSE	FALSE	FALSE	0.00454933	0.975452	0.995157	2.74247	0.928834	0.00378941	2.74247	0.996635	0.017151	2.73792	0.757533	0.00383591	2.73792	1	0.0173094	0	0.945566	1	FALSE	FALSE	FALSE	FALSE	FALSE	FALSE
P23763	VAMP1	Vesicle-associated membrane protein 1	0.9877	0.78827	0.83455	0.96151	TRUE	TRUE	TRUE	TRUE	0.30163	0.951841	0.415951	-0.614619	0.985639	0.146426	0.319122	0.998883	0.541164	-0.916249	0.950011	0.0362067	0.0174921	1	0.97314	0.933741	0.721365	0.102793	FALSE	FALSE	FALSE	FALSE	FALSE	FALSE
P63027	VAMP2	Vesicle-associated membrane protein 2	0.85616	0.8364	0.94191	0.94858	TRUE	TRUE	TRUE	TRUE	-0.0868783	0.972062	0.846302	-0.0431395	0.99362	0.931366	0.490757	0.998802	0.442351	0.0437389	0.994324	0.930415	0.577635	1	0.367385	0.533896	0.896507	0.430917	FALSE	FALSE	FALSE	FALSE	FALSE	FALSE
Q15836	VAMP3	Vesicle-associated membrane protein 3	0.97368	0.68211	0.79795	0.68551	TRUE	FALSE	TRUE	FALSE	0.599807	0.931787	0.261326	0.464103	0.99089	0.432722	0.674786	0.998727	0.368478	-0.135705	0.99378	0.817135	0.0749792	1	0.9195	0.210684	0.934373	0.789079	FALSE	FALSE	FALSE	FALSE	FALSE	FALSE
Q9P0L0	VAPA	Vesicle-associated membrane protein-associated protein A	0.94725	0.88503	0.97561	0.86692	TRUE	TRUE	TRUE	TRUE	-0.348384	0.959969	0.531151	-0.106032	0.993372	0.863945	-0.104451	0.999075	0.893822	0.242352	0.993054	0.695816	0.243933	1	0.755531	0.00158128	0.945499	0.99848	FALSE	FALSE	FALSE	FALSE	FALSE	FALSE
O95292	VAPB	Vesicle-associated membrane protein-associated protein B/C	0.95368	0.86516	0.97468	0.68551	TRUE	TRUE	TRUE	FALSE	0.508169	0.946791	0.364277	-0.260796	0.992532	0.674283	-1.00382	0.998474	0.209917	-0.768965	0.985329	0.2238	-1.51199	1	0.0657955	-0.743027	0.885714	0.37623	FALSE	FALSE	FALSE	FALSE	FALSE	FALSE
P26640	VARS1	Valine--tRNA ligase	0.94828	0.70967	0.68551	0	TRUE	FALSE	FALSE	FALSE	0.595953	0.953117	0.431043	1.96195	0.971649	0.0289784	2.61335	0.996912	0.0223452	1.366	0.977363	0.115917	2.0174	1	0.0696804	0.651405	0.9153	0.564529	FALSE	FALSE	FALSE	FALSE	FALSE	FALSE
Q99536	VAT1	Synaptic vesicle membrane protein VAT-1 homolog	0.97235	0.78986	0.90861	0.99398	TRUE	TRUE	TRUE	TRUE	-0.739722	0.848351	0.0883263	-0.418045	0.990305	0.374544	-0.321094	0.998915	0.587134	0.321677	0.991247	0.492478	0.418628	1	0.480252	0.0969509	0.939556	0.87669	FALSE	FALSE	FALSE	FALSE	FALSE	FALSE
Q9HCJ6	VAT1L	Synaptic vesicle membrane protein VAT-1 homolog-like	0.87152	0.83181	0	0	TRUE	TRUE	FALSE	FALSE	NA	NA	NA	NA	NA	NA	NA	NA	NA	NA	NA	NA	NA	NA	NA	NA	NA	NA	NA	NA	NA	NA	NA	NA
P13611	VCAN	Versican core protein	0.83352	0.92228	0.93676	0.99116	TRUE	TRUE	TRUE	TRUE	-0.532023	0.941041	0.317655	-0.651646	0.988948	0.274944	-0.433003	0.998897	0.561572	-0.119623	0.993892	0.838584	0.0990201	1	0.893916	0.218643	0.93388	0.78149	FALSE	FALSE	FALSE	FALSE	FALSE	FALSE
P18206	VCL	Vinculin	0.9816	0.5971	0.68528	0.95126	TRUE	FALSE	FALSE	TRUE	0.0439274	0.973853	0.919991	-0.324426	0.99152	0.509542	-0.942647	0.998265	0.13948	-0.368353	0.990774	0.454735	-0.986575	1	0.12301	-0.618222	0.880012	0.351816	FALSE	FALSE	FALSE	FALSE	FALSE	FALSE
P55072	VCP	Transitional endoplasmic reticulum ATPase	0.87992	0.86551	0.83268	0.99402	TRUE	TRUE	TRUE	TRUE	0.412084	0.919795	0.210229	0.0369782	0.993573	0.918112	0.73104	0.998184	0.120462	-0.375106	0.987993	0.304139	0.318956	1	0.486179	0.694062	0.793049	0.161791	FALSE	FALSE	FALSE	FALSE	FALSE	FALSE
P21796	VDAC1	Voltage-dependent anion-selective channel protein 1	0.86351	0.67395	0.8379	0.97147	TRUE	FALSE	TRUE	TRUE	0.411391	0.914357	0.192448	-0.202804	0.991857	0.557959	-0.49565	0.998581	0.263764	-0.614195	0.972626	0.0872575	-0.907041	1	0.0489477	-0.292846	0.911035	0.528636	FALSE	FALSE	FALSE	FALSE	FALSE	FALSE
P45880	VDAC2	Voltage-dependent anion-selective channel protein 2	0.96815	0.66865	0.98575	0.96035	TRUE	FALSE	TRUE	TRUE	-0.772393	0.88288	0.125938	-0.33085	0.99178	0.546458	-0.697971	0.998665	0.318826	0.441543	0.99032	0.422739	0.0744227	1	0.914169	-0.367121	0.920816	0.617364	FALSE	FALSE	FALSE	FALSE	FALSE	FALSE
Q9Y277	VDAC3	Voltage-dependent anion-selective channel protein 3	0.98614	0.62559	0.68551	0	TRUE	FALSE	FALSE	FALSE	1.53328	0.748888	0.0430023	2.91418	0.892864	0.0016224	3.69474	0.992216	0.00159151	1.3809	0.974416	0.0965044	2.16147	1	0.0435995	0.780566	0.902867	0.469655	FALSE	FALSE	FALSE	FALSE	FALSE	FALSE
O75436	VPS26A	Vacuolar protein sorting-associated protein 26A	0.87467	0.15093	0.68551	0	TRUE	FALSE	FALSE	FALSE	NA	NA	NA	NA	NA	NA	NA	NA	NA	NA	NA	NA	NA	NA	NA	NA	NA	NA	NA	NA	NA	NA	NA	NA
Q96QK1	VPS35	Vacuolar protein sorting-associated protein 35	0.98927	0.82488	0.98763	0.92464	TRUE	TRUE	TRUE	TRUE	-0.0610578	0.973022	0.884568	-0.221176	0.992344	0.639023	1.0074	0.998093	0.102848	-0.160118	0.993301	0.733799	1.06846	1	0.0849908	1.22858	0.650567	0.0636627	FALSE	FALSE	FALSE	FALSE	FALSE	FALSE
P62760	VSNL1	Visinin-like protein 1	0.93137	0.84556	0.93905	0.6762	TRUE	TRUE	TRUE	FALSE	0.452801	0.941181	0.31866	0.501586	0.989674	0.323014	0.634399	0.998671	0.323061	0.0487847	0.994289	0.922372	0.181598	1	0.774514	0.132813	0.937686	0.843316	FALSE	FALSE	FALSE	FALSE	FALSE	FALSE
Q9NP79	VTA1	Vacuolar protein sorting-associated protein VTA1 homolog	0.91362	0.52619	0.77136	0	TRUE	FALSE	TRUE	FALSE	0.552439	0.964688	0.626016	1.41623	0.988871	0.27043	3.75875	0.997135	0.0281738	0.863788	0.991298	0.496884	3.20631	1	0.0567665	2.34252	0.80601	0.177947	FALSE	FALSE	FALSE	FALSE	FALSE	FALSE
P04004	VTN	Vitronectin	0.85257	0.89579	0.98329	0.9916	TRUE	TRUE	TRUE	TRUE	-0.430421	0.944834	0.347143	-0.75193	0.985732	0.148733	0.299955	0.998948	0.640026	-0.321509	0.991632	0.527102	0.730376	1	0.261838	1.05188	0.76424	0.133104	FALSE	FALSE	FALSE	FALSE	FALSE	FALSE
P23381	WARS1	Tryptophan--tRNA ligase, cytoplasmic	0.95225	0.56239	0	0	TRUE	FALSE	FALSE	FALSE	1.31603	0.771642	0.0494552	2.84711	0.838148	0.000701975	2.84711	0.994774	0.0047043	1.53108	0.95473	0.0417624	1.53108	1	0.100255	0	0.945566	1	FALSE	FALSE	FALSE	FALSE	FALSE	FALSE
Q92558	WASF1	Actin-binding protein WASF1	0.79609	0.94882	0.68551	0	TRUE	TRUE	FALSE	FALSE	-1.1827	0.908689	0.176508	0.434304	0.992402	0.649636	1.26825	0.998639	0.300236	1.61701	0.975423	0.102474	2.45095	1	0.0539449	0.833946	0.909528	0.516856	FALSE	FALSE	FALSE	FALSE	FALSE	FALSE
O00401	WASL	Actin nucleation-promoting factor WASL	0.89393	0.68551	0	0	TRUE	FALSE	FALSE	FALSE	NA	NA	NA	NA	NA	NA	NA	NA	NA	NA	NA	NA	NA	NA	NA	NA	NA	NA	NA	NA	NA	NA	NA	NA
Q969T9	WBP2	WW domain-binding protein 2	0.93248	0.7776	0.68551	0	TRUE	TRUE	FALSE	FALSE	-0.0420287	0.974795	0.963108	2.32732	0.972836	0.0320087	3.50042	0.99629	0.0127737	2.36935	0.942152	0.0293826	3.54245	1	0.0118969	1.1731	0.889546	0.394258	FALSE	FALSE	FALSE	FALSE	FALSE	FALSE
O75083	WDR1	WD repeat-containing protein 1	0.90077	0.825	0.92484	0.9913	TRUE	TRUE	TRUE	TRUE	-0.706172	0.855713	0.0946173	-0.750518	0.983882	0.110777	-1.09631	0.997836	0.0685898	-0.0443459	0.994288	0.922177	-0.390141	1	0.499553	-0.345795	0.916116	0.571863	FALSE	FALSE	FALSE	FALSE	FALSE	FALSE
O94967	WDR47	WD repeat-containing protein 47	0.98068	0.8642	0.68551	0	TRUE	TRUE	FALSE	FALSE	0.555783	0.941706	0.3225	1.31979	0.976369	0.044374	1.8297	0.997167	0.0292082	0.76401	0.985464	0.227004	1.27392	1	0.116471	0.50991	0.912634	0.541637	FALSE	FALSE	FALSE	FALSE	FALSE	FALSE
Q5T750	XP32	Skin-specific protein 32	0.55395	0.45501	0.40262	0.97311	FALSE	FALSE	FALSE	TRUE	1.06002	0.678323	0.029412	-0.636774	0.98787	0.220034	-1.29807	0.997687	0.0554008	-1.69679	0.73039	0.00326917	-2.35809	1	0.00155224	-0.661295	0.876593	0.338408	FALSE	FALSE	FALSE	FALSE	FALSE	FALSE
Q9NQW7	XPNPEP1	Xaa-Pro aminopeptidase 1	0.98361	0.73407	0.83924	0	TRUE	FALSE	TRUE	FALSE	0.853437	0.927277	0.239809	2.03844	0.965242	0.0181538	3.77564	0.991558	0.00128907	1.185	0.980784	0.148419	2.9222	1	0.00864974	1.7372	0.742521	0.116296	FALSE	FALSE	FALSE	FALSE	FALSE	FALSE
P13010	XRCC5	X-ray repair cross-complementing protein 5	0.93886	0.74639	0.83682	0	TRUE	FALSE	TRUE	FALSE	-1.15985	0.90983	0.179529	1.00737	0.989229	0.292323	2.35724	0.997743	0.0599555	2.16723	0.944695	0.0313289	3.5171	1	0.00774152	1.34987	0.863106	0.292897	FALSE	FALSE	FALSE	FALSE	FALSE	FALSE
P12956	XRCC6	X-ray repair cross-complementing protein 6	0.9357	0.57943	0.68551	0	TRUE	FALSE	FALSE	FALSE	0.669856	0.948011	0.375708	1.73389	0.977479	0.0497213	2.45129	0.9972	0.0302822	1.06403	0.984853	0.213164	1.78143	1	0.104729	0.717399	0.910557	0.524851	FALSE	FALSE	FALSE	FALSE	FALSE	FALSE
Q5VVQ6	YOD1	Ubiquitin thioesterase OTU1	0.58888	0.49219	0.68551	0.9642	FALSE	FALSE	FALSE	TRUE	0.371568	0.936887	0.289999	0.444189	0.988667	0.258943	-0.919875	0.997872	0.0723363	0.0726205	0.993954	0.851008	-1.29144	1	0.0152521	-1.36406	0.412337	0.0156186	FALSE	FALSE	FALSE	FALSE	FALSE	FALSE
P31946	YWHAB	14-3-3 protein beta/alpha	0.45081	0.74424	0.28408	0.97076	FALSE	FALSE	FALSE	TRUE	0.0278982	0.974489	0.94875	-0.582385	0.988286	0.239247	0.339147	0.998911	0.582184	-0.610283	0.985089	0.21834	0.311249	1	0.613364	0.921532	0.798463	0.168248	FALSE	FALSE	FALSE	FALSE	FALSE	FALSE
P62258	YWHAE	14-3-3 protein epsilon	0.9209	0.80194	0.81033	0.93733	TRUE	TRUE	TRUE	TRUE	0.657552	0.81275	0.0657575	0.39874	0.989378	0.302127	0.543366	0.998587	0.267407	-0.258812	0.991326	0.49931	-0.114185	1	0.81268	0.144627	0.933602	0.777265	FALSE	FALSE	FALSE	FALSE	FALSE	FALSE
P61981	YWHAG	14-3-3 protein gamma	0.85861	0.73976	0.85199	0.88714	TRUE	FALSE	TRUE	TRUE	0.641464	0.943955	0.339901	0.680271	0.990194	0.364726	1.46089	0.998234	0.131738	0.0388074	0.994443	0.958282	0.819431	1	0.387548	0.780623	0.89753	0.436783	FALSE	FALSE	FALSE	FALSE	FALSE	FALSE
Q04917	YWHAH	14-3-3 protein eta	0.96538	0.70593	0.83939	0.68551	TRUE	FALSE	TRUE	FALSE	0.892752	0.664076	0.0274387	0.532507	0.987797	0.216886	-0.798	0.998293	0.146821	-0.360244	0.989931	0.398067	-1.69075	1	0.00480042	-1.33051	0.519364	0.0283227	FALSE	FALSE	FALSE	FALSE	FALSE	FALSE
P27348	YWHAQ	14-3-3 protein theta	0.95568	0.64858	0.72523	0.68551	TRUE	FALSE	FALSE	FALSE	0.863097	0.937001	0.290705	0.463075	0.992166	0.607809	0.175402	0.999068	0.877453	-0.400022	0.99278	0.65723	-0.687695	1	0.547385	-0.287673	0.935795	0.811631	FALSE	FALSE	FALSE	FALSE	FALSE	FALSE
P63104	YWHAZ	14-3-3 protein zeta/delta	0.82078	0.80716	0.7237	0.99396	TRUE	TRUE	FALSE	TRUE	0.286916	0.952829	0.427553	0.731857	0.981589	0.080422	0.0677307	0.999075	0.893732	0.444942	0.987176	0.274959	-0.219185	1	0.666272	-0.664127	0.835734	0.226332	FALSE	FALSE	FALSE	FALSE	FALSE	FALSE
Q96DA0	ZG16B	Zymogen granule protein 16 homolog B	0.68861	0.54098	0.51126	0.97694	FALSE	FALSE	FALSE	TRUE	-0.423629	0.945684	0.354407	-0.992245	0.979441	0.0617492	-2.64631	0.987951	0.000531841	-0.568616	0.986982	0.268715	-2.22268	1	0.00238819	-1.65407	0.484771	0.0234588	FALSE	FALSE	FALSE	FALSE	FALSE	FALSE
