# Supplementary material for: Probe-dependent Proximity Profiling (ProPPr) Uncovers Similarities and Differences in Phospho-Tau-Associated Proteomes Between Tauopathies
Source: Mol Neurodegener. 2025 Mar 13;20:32. doi: 10.1186/s13024-025-00817-0 (PMC11905455; doi:10.1186/s13024-025-00817-0)
Supplement: Supplementary file 4 — Supplementary Material 4. [file 13024_2025_817_MOESM4_ESM.xlsx]

## Sheet: Supplementary table 3
Table S3: Gene Ontology Biological Process overrepresented terms in phospho-tau-associated proteome shared across tauopathies. ID - Gene Ontology term ID; GeneRatio - ratio between number of genes from the input mapped to a given GO term and number of genes from the input mapped to any GO term; BgRatio - ratio between number of genes in a given GO term and total number of genes in all GO terms; p…
ONTOLOGY	ID	Description	GeneRatio	BgRatio	pvalue	p.adjust	qvalue	geneID	Count
BP	GO:0099003	vesicle-mediated transport in synapse	23/226	220/18614	3.05e-15	5.92e-12	4.57e-12	CYFIP1,SEPTIN5,SYN1,AMPH,SYN2,ATP6V1H,RAP1B,PPP3CB,SNAP25,SNCG,RAB3A,SCRN1,ARHGDIA,ATP6V0D1,SNAP91,ATP6V1B2,VPS35,CTBP1,SYT1,ATP6V0A1,ATP6V1A,VAMP2,BIN1	23
BP	GO:0099504	synaptic vesicle cycle	22/226	198/18614	3.48e-15	5.92e-12	4.57e-12	CYFIP1,SEPTIN5,SYN1,AMPH,SYN2,ATP6V1H,RAP1B,PPP3CB,SNAP25,SNCG,RAB3A,SCRN1,ARHGDIA,ATP6V0D1,SNAP91,ATP6V1B2,CTBP1,SYT1,ATP6V0A1,ATP6V1A,VAMP2,BIN1	22
BP	GO:0043254	regulation of protein-containing complex assembly	27/226	409/18614	8.82e-13	9.99e-10	7.72e-10	CYFIP1,SIRT2,MAPT,HSPA1A,HSPA8,RPS3,SEPTIN8,RAP1B,TUBB4A,LGALS3,TPPP,HSPA5,VCP,RAB3A,TMOD2,TPPP3,FSCN1,CLU,GSN,SPTAN1,STMN1,RHOA,ARPC3,SPTBN2,VPS35,CAPZA1,BIN1	27
BP	GO:0061077	chaperone-mediated protein folding	12/226	69/18614	3.67e-11	3.12e-08	2.41e-08	CCT8,CCT6A,HSPA1A,CCT2,HSPA8,TCP1,HSPA5,HSPA2,HSPA9,CLU,CCT3,CCT7	12
BP	GO:0050808	synapse organization	26/226	466/18614	1.02e-10	6.91e-08	5.34e-08	CYFIP1,NPTN,MAPT,SYN1,L1CAM,TUBB,INA,GPHN,HSPA8,RAP1B,VCP,NEGR1,SNCG,RAB3A,GPM6A,TNC,NRCAM,RHOA,SPTBN2,PLXNA4,C3,VPS35,CAMK2B,BCAN,ICAM5,TNR	26
BP	GO:0006457	protein folding	18/226	220/18614	2.13e-10	1.21e-07	9.34e-08	CCT8,CCT6A,HSPA1A,CCT2,HSPA8,TCP1,HSPA5,HSPA2,HSPA9,PPIA,PDIA3,CLU,CCT3,P4HB,TBCA,HSP90B1,HSP90AB1,CCT7	18
BP	GO:1904851	positive regulation of establishment of protein localization to telomere	6/226	10/18614	6.05e-10	2.93e-07	2.27e-07	CCT8,CCT6A,CCT2,TCP1,CCT3,CCT7	6
BP	GO:0032271	regulation of protein polymerization	16/226	191/18614	1.58e-09	4.87e-07	3.76e-07	CYFIP1,MAPT,HSPA1A,RPS3,TUBB4A,TPPP,TMOD2,TPPP3,GSN,SPTAN1,STMN1,RHOA,ARPC3,SPTBN2,CAPZA1,BIN1	16
BP	GO:1902600	proton transmembrane transport	14/226	143/18614	2.25e-09	5.54e-07	4.28e-07	COX2,ACTN4,ATP6V1H,ATP5F1A,ATP1A2,ATP1A1,ATP5F1B,ATP6V0D1,ATP6V1B2,ATP1A3,ATP6V0A1,ATP6V1A,ATP1B1,NHERF1	14
BP	GO:0009205	purine ribonucleoside triphosphate metabolic process	17/226	244/18614	7.96e-09	1.48e-06	1.15e-06	COX2,HSPA1A,HSPA8,ATP5F1A,ALDOA,VCP,ATP1A2,ALDOC,TPI1,PKM,HK1,ATP5F1B,RHOA,ATP6V1B2,OLA1,ATP6V1A,ATP1B1	17
BP	GO:0046034	ATP metabolic process	16/226	219/18614	1.13e-08	1.84e-06	1.42e-06	COX2,HSPA1A,HSPA8,ATP5F1A,ALDOA,VCP,ATP1A2,ALDOC,TPI1,PKM,HK1,ATP5F1B,ATP6V1B2,OLA1,ATP6V1A,ATP1B1	16
BP	GO:0019058	viral life cycle	19/226	320/18614	1.41e-08	2e-06	1.54e-06	HSPA1A,MOG,VAPA,HSPA8,LGALS1,VCP,EEF1A1,RAB7A,PPIA,GSN,P4HB,CTBP1,HSP90AB1,PCBP1,CD81,SLC3A2,RPSA,NCAM1,RAB1A	19
BP	GO:0031647	regulation of protein stability	19/226	322/18614	1.56e-08	2.12e-06	1.64e-06	CCT8,MAPK1,CCT6A,HSPA1A,RPS7,CCT2,HSPA8,TCP1,CLU,GSN,CCT3,LAMP2,TF,VPS35,HSP90AB1,CCT7,CD81,ATP1B1,LMNA	19
BP	GO:0061564	axon development	23/226	479/18614	2.21e-08	2.89e-06	2.24e-06	NCAM2,CYFIP1,MAPT,L1CAM,PLP1,PTPRZ1,PPP3CB,RAB3A,TUBB3,MAP6,TNC,UCHL1,MAP1A,STMN1,NRCAM,PLXNA4,HSP90AB1,THY1,RAB10,NFASC,NCAM1,DPYSL5,TNR	23
BP	GO:0050804	modulation of chemical synaptic transmission	23/226	487/18614	3e-08	3.78e-06	2.92e-06	CYFIP1,MAPK1,NPTN,MAPT,SEPTIN5,CA2,SYN1,PPP3CA,INA,RAP1B,PPP3CB,SNAP25,SNCG,RAB3A,ATP1A2,MAP1A,CAMK2A,VPS35,CAMK2B,NCDN,SYT1,VAMP2,TNR	23
BP	GO:0051258	protein polymerization	17/226	276/18614	4.91e-08	5.07e-06	3.92e-06	CYFIP1,MAPT,HSPA1A,RPS3,TUBB4A,VTN,TPPP,TMOD2,TPPP3,GSN,SPTAN1,STMN1,RHOA,ARPC3,SPTBN2,CAPZA1,BIN1	17
BP	GO:0036465	synaptic vesicle recycling	10/226	81/18614	5.05e-08	5.07e-06	3.92e-06	CYFIP1,AMPH,PPP3CB,SNCG,RAB3A,SNAP91,CTBP1,SYT1,VAMP2,BIN1	10
BP	GO:0021762	substantia nigra development	8/226	44/18614	5.08e-08	5.07e-06	3.92e-06	PADI2,SIRT2,YWHAE,PLP1,INA,HSPA5,CKB,RHOA	8
BP	GO:0070198	protein localization to chromosome, telomeric region	7/226	30/18614	5.69e-08	5.52e-06	4.27e-06	CCT8,CCT6A,CCT2,TCP1,CCT3,TPP1,CCT7	7
BP	GO:0019693	ribose phosphate metabolic process	22/226	473/18614	7.97e-08	6.77e-06	5.24e-06	COX2,DLST,PRPS1,GDA,HSPA1A,HSPA8,ATP5F1A,ALDOA,VCP,HPRT1,ATP1A2,ALDOC,TPI1,PKM,HK1,ATP5F1B,RHOA,ATP6V1B2,OLA1,ATP6V1A,ATP1B1,ACOT7	22
BP	GO:0009150	purine ribonucleotide metabolic process	21/226	445/18614	1.25e-07	1.04e-05	8.03e-06	COX2,DLST,GDA,HSPA1A,HSPA8,ATP5F1A,ALDOA,VCP,HPRT1,ATP1A2,ALDOC,TPI1,PKM,HK1,ATP5F1B,RHOA,ATP6V1B2,OLA1,ATP6V1A,ATP1B1,ACOT7	21
BP	GO:0032212	positive regulation of telomere maintenance via telomerase	7/226	34/18614	1.44e-07	1.16e-05	9e-06	CCT8,MAPK1,CCT6A,CCT2,TCP1,CCT3,CCT7	7
BP	GO:0007004	telomere maintenance via telomerase	9/226	69/18614	1.47e-07	1.16e-05	9e-06	CCT8,MAPK1,CCT6A,CCT2,TCP1,HNRNPC,CCT3,HSP90AB1,CCT7	9
BP	GO:1902903	regulation of supramolecular fiber organization	19/226	376/18614	1.8e-07	1.39e-05	1.07e-05	CYFIP1,RNH1,MAPT,HSPA1A,HSPA8,RPS3,TUBB4A,TMOD2,CLU,GSN,SPTAN1,WDR1,MAP1A,STMN1,RHOA,ARPC3,SPTBN2,CAPZA1,BIN1	19
BP	GO:0032210	regulation of telomere maintenance via telomerase	8/226	53/18614	2.31e-07	1.73e-05	1.34e-05	CCT8,MAPK1,CCT6A,CCT2,TCP1,HNRNPC,CCT3,CCT7	8
BP	GO:0051701	biological process involved in interaction with host	14/226	206/18614	2.34e-07	1.73e-05	1.34e-05	HSPA1A,MOG,VAPA,TCP1,LGALS1,RAB7A,PPIA,GSN,P4HB,HSP90AB1,CD81,SLC3A2,RPSA,NCAM1	14
BP	GO:0010959	regulation of metal ion transport	20/226	423/18614	2.46e-07	1.78e-05	1.37e-05	ACTN4,YWHAE,PPP3CA,PLP1,LGALS3,PPP3CB,HSPA2,ATP1A2,GNB2,ATP1A1,TF,RHOA,CAMK2A,THY1,CAMK2B,ATP2B1,VAMP2,ATP1B1,BIN1,NHERF1	20
BP	GO:0007409	axonogenesis	20/226	427/18614	2.86e-07	1.93e-05	1.49e-05	CYFIP1,MAPT,L1CAM,PTPRZ1,PPP3CB,RAB3A,TUBB3,MAP6,UCHL1,MAP1A,STMN1,NRCAM,PLXNA4,HSP90AB1,THY1,RAB10,NFASC,NCAM1,DPYSL5,TNR	20
BP	GO:1903829	positive regulation of protein localization	21/226	468/18614	2.89e-07	1.93e-05	1.49e-05	CCT8,NPTN,MAPT,YWHAE,GNA11,CCT6A,CCT2,TCP1,GNAI1,LGALS3,LRP1,PPP3CB,PPIA,CCT3,MAP1A,VPS35,HSP90AB1,CCT7,CD81,NPEPPS,VAMP2	21
BP	GO:0008037	cell recognition	12/226	155/18614	4.32e-07	2.77e-05	2.14e-05	NCAM2,CCT8,VCAN,CCT2,TCP1,LGALS3,ALDOA,CCT3,NRCAM,NTM,CCT7,CD81	12
BP	GO:1901998	toxin transport	7/226	40/18614	4.7e-07	2.96e-05	2.29e-05	CCT8,CCT2,TCP1,HSPA5,CCT3,CCT7,ATP6V0A1	7
BP	GO:0090066	regulation of anatomical structure size	21/226	492/18614	6.54e-07	3.97e-05	3.07e-05	CYFIP1,MAPT,L1CAM,HBB,TMOD2,ATP1A2,GSN,SPTAN1,WDR1,NRCAM,RHOA,ARPC3,SPTBN2,PLXNA4,SOD2,ATP2B1,CAPZA1,HP1BP3,BIN1,TNR,NHERF1	21
BP	GO:0016188	synaptic vesicle maturation	6/226	27/18614	7.17e-07	4.2e-05	3.25e-05	ATP6V1H,RAB3A,ATP6V0D1,ATP6V1B2,ATP6V0A1,ATP6V1A	6
BP	GO:0097401	synaptic vesicle lumen acidification	5/226	16/18614	9.89e-07	5.6e-05	4.33e-05	ATP6V1H,ATP6V0D1,ATP6V1B2,ATP6V0A1,ATP6V1A	5
BP	GO:0044403	biological process involved in symbiotic interaction	16/226	313/18614	1.49e-06	8.05e-05	6.23e-05	HSPA1A,MOG,VAPA,HSPA8,TCP1,LGALS1,EEF1A1,RAB7A,PPIA,GSN,P4HB,HSP90AB1,CD81,SLC3A2,RPSA,NCAM1	16
BP	GO:0032535	regulation of cellular component size	17/226	354/18614	1.64e-06	8.71e-05	6.74e-05	CYFIP1,MAPT,L1CAM,TMOD2,GSN,SPTAN1,WDR1,NRCAM,RHOA,ARPC3,SPTBN2,PLXNA4,CAPZA1,HP1BP3,BIN1,TNR,NHERF1	17
BP	GO:0001505	regulation of neurotransmitter levels	13/226	211/18614	1.92e-06	0.000100007	7.73e-05	SEPTIN5,SYN1,SYN2,ALDH5A1,RAP1B,SNAP25,SNCG,RAB3A,ATP1A2,CAMK2A,SYT1,ALDH9A1,VAMP2	13
BP	GO:0030641	regulation of cellular pH	9/226	93/18614	1.94e-06	0.000100007	7.73e-05	MAPK1,CA2,ATP6V1H,RAB7A,ATP5F1B,ATP6V0D1,ATP6V1B2,ATP6V0A1,ATP6V1A	9
BP	GO:0031333	negative regulation of protein-containing complex assembly	11/226	148/18614	1.97e-06	0.000100009	7.73e-05	SIRT2,TUBB4A,HSPA5,TMOD2,CLU,GSN,SPTAN1,STMN1,SPTBN2,VPS35,CAPZA1	11
BP	GO:0048488	synaptic vesicle endocytosis	8/226	70/18614	2.06e-06	0.000103028	7.97e-05	AMPH,PPP3CB,SNCG,SNAP91,CTBP1,SYT1,VAMP2,BIN1	8
BP	GO:0009988	cell-cell recognition	8/226	72/18614	2.56e-06	0.000124278	9.61e-05	CCT8,CCT2,TCP1,LGALS3,ALDOA,CCT3,CCT7,CD81	8
BP	GO:0016050	vesicle organization	17/226	368/18614	2.77e-06	0.000132723	0.000102623	ATP6V1H,VAPA,SEPTIN8,SNAP25,RAB3A,RAB7A,RAB14,ATP6V0D1,VAMP1,SNAP91,ATP6V1B2,RAB5B,SYT1,ATP6V0A1,ATP6V1A,VAMP2,RAB1A	17
BP	GO:0044000	movement in host	12/226	185/18614	2.82e-06	0.000133156	0.000102957	HSPA1A,MOG,VAPA,LGALS1,RAB7A,PPIA,GSN,P4HB,CD81,SLC3A2,RPSA,NCAM1	12
BP	GO:0070507	regulation of microtubule cytoskeleton organization	11/226	155/18614	3.1e-06	0.000144207	0.000111502	MAPT,HSPA1A,RPS3,GNAI1,TUBB4A,TPPP,MAP6,MAP1A,STMN1,RHOA,CLTC	11
BP	GO:2000573	positive regulation of DNA biosynthetic process	8/226	74/18614	3.16e-06	0.000144984	0.000112103	CCT8,MAPK1,CCT6A,CCT2,TCP1,CCT3,HSP90AB1,CCT7	8
BP	GO:0051452	intracellular pH reduction	7/226	54/18614	3.86e-06	0.000175107	0.000135394	CA2,ATP6V1H,RAB7A,ATP6V0D1,ATP6V1B2,ATP6V0A1,ATP6V1A	7
BP	GO:0031334	positive regulation of protein-containing complex assembly	12/226	195/18614	4.86e-06	0.000213503	0.000165083	MAPT,HSPA1A,RPS3,RAP1B,LGALS3,TPPP,VCP,TPPP3,FSCN1,CLU,RHOA,BIN1	12
BP	GO:0051924	regulation of calcium ion transport	14/226	266/18614	4.9e-06	0.000213503	0.000165083	YWHAE,PPP3CA,PLP1,LGALS3,PPP3CB,HSPA2,ATP1A2,RHOA,CAMK2A,THY1,CAMK2B,ATP2B1,ATP1B1,BIN1	14
BP	GO:0042026	protein refolding	5/226	22/18614	5.62e-06	0.000241578	0.00018679	HSPA1A,HSPA8,HSPA5,HSPA2,HSPA9	5
BP	GO:0007339	binding of sperm to zona pellucida	6/226	38/18614	5.98e-06	0.000250887	0.000193989	CCT8,CCT2,TCP1,ALDOA,CCT3,CCT7	6
BP	GO:0051084	'de novo' post-translational protein folding	6/226	38/18614	5.98e-06	0.000250887	0.000193989	HSPA1A,CCT2,HSPA8,HSPA5,HSPA2,HSPA9	6
BP	GO:0010001	glial cell differentiation	13/226	235/18614	6.28e-06	0.000260295	0.000201263	SIRT2,MAPK1,MAPT,PLP1,VTN,PTPRZ1,TPPP,LRP1,CLU,WDR1,RHOA,PHGDH,BIN1	13
BP	GO:0010248	establishment or maintenance of transmembrane electrochemical gradient	4/226	11/18614	6.53e-06	0.000264218	0.000204296	ATP1A2,ATP1A1,ATP1A3,ATP1B1	4
BP	GO:0034975	protein folding in endoplasmic reticulum	4/226	11/18614	6.53e-06	0.000264218	0.000204296	HSPA5,PDIA3,P4HB,HSP90B1	4
BP	GO:0007039	protein catabolic process in the vacuole	5/226	23/18614	7.11e-06	0.000284066	0.000219643	LRP1,LAMP2,TPP1,VPS35,CD81	5
BP	GO:0007212	dopamine receptor signaling pathway	6/226	40/18614	8.15e-06	0.000321959	0.000248942	GNA11,GNAS,GNAO1,VPS35,GNB1,NHERF1	6
BP	GO:0007269	neurotransmitter secretion	10/226	141/18614	8.81e-06	0.00034003	0.000262915	SEPTIN5,SYN1,SYN2,RAP1B,SNAP25,SNCG,RAB3A,CAMK2A,SYT1,VAMP2	10
BP	GO:0048167	regulation of synaptic plasticity	12/226	209/18614	9.86e-06	0.000376475	0.000291094	MAPK1,NPTN,MAPT,PPP3CB,SNAP25,RAB3A,MAP1A,CAMK2A,CAMK2B,NCDN,VAMP2,TNR	12
BP	GO:0010975	regulation of neuron projection development	18/226	452/18614	1.1e-05	0.000406273	0.000314135	CYFIP1,NPTN,MAPT,L1CAM,PPP3CA,DPYSL3,HSPA5,NEGR1,SNAP25,MAP6,NRCAM,RHOA,PLXNA4,CRMP1,THY1,CAMK2B,DPYSL5,TNR	18
BP	GO:0070841	inclusion body assembly	5/226	25/18614	1.1e-05	0.000406273	0.000314135	MAPT,HSPA1A,VCP,HSPA2,CLU	5
BP	GO:0051261	protein depolymerization	9/226	115/18614	1.13e-05	0.000412006	0.000318567	HSPA8,TMOD2,GSN,SPTAN1,WDR1,MAP1A,STMN1,SPTBN2,CAPZA1	9
BP	GO:0051453	regulation of intracellular pH	8/226	88/18614	1.16e-05	0.000420821	0.000325383	CA2,ATP6V1H,RAB7A,ATP5F1B,ATP6V0D1,ATP6V1B2,ATP6V0A1,ATP6V1A	8
BP	GO:0050821	protein stabilization	12/226	213/18614	1.19e-05	0.000426993	0.000330156	CCT8,CCT6A,HSPA1A,RPS7,CCT2,TCP1,CLU,CCT3,LAMP2,HSP90AB1,CCT7,ATP1B1	12
BP	GO:0070050	neuron cellular homeostasis	7/226	64/18614	1.22e-05	0.000432963	0.000334772	CA2,ATP6V1H,ATP6V0D1,MAP1A,ATP6V1B2,ATP6V0A1,ATP6V1A	7
BP	GO:0017156	calcium-ion regulated exocytosis	7/226	65/18614	1.36e-05	0.000475306	0.000367511	SYN2,RAP1B,PPP3CB,SNAP25,RAB3A,SYT1,VAMP2	7
BP	GO:0008064	regulation of actin polymerization or depolymerization	10/226	149/18614	1.43e-05	0.000496153	0.000383631	CYFIP1,TMOD2,GSN,SPTAN1,WDR1,RHOA,ARPC3,SPTBN2,CAPZA1,BIN1	10
BP	GO:0032970	regulation of actin filament-based process	16/226	387/18614	2.18e-05	0.000724852	0.000560463	CYFIP1,RNH1,LRP1,TMOD2,FSCN1,ATP1A2,GSN,ARHGDIA,SPTAN1,WDR1,STMN1,RHOA,ARPC3,SPTBN2,CAPZA1,BIN1	16
BP	GO:1990778	protein localization to cell periphery	15/226	345/18614	2.21e-05	0.000725128	0.000560677	NSF,GNAI1,LGALS3,LRP1,SNAP25,RAB3A,RAB7A,VPS35,RAB10,CD81,NFASC,CLTC,VAMP2,ATP1B1,NHERF1	15
BP	GO:0032956	regulation of actin cytoskeleton organization	15/226	346/18614	2.28e-05	0.000739242	0.000571589	CYFIP1,RNH1,LRP1,TMOD2,FSCN1,GSN,ARHGDIA,SPTAN1,WDR1,STMN1,RHOA,ARPC3,SPTBN2,CAPZA1,BIN1	15
BP	GO:0006887	exocytosis	15/226	351/18614	2.7e-05	0.000856624	0.00066235	NSF,SEPTIN5,SYN1,SYN2,PTGDS,RAP1B,PPP3CB,SNAP25,RAB3A,SCRN1,RAB7A,SEPTIN2,RAB10,SYT1,VAMP2	15
BP	GO:0051588	regulation of neurotransmitter transport	8/226	99/18614	2.77e-05	0.000870244	0.000672882	SEPTIN5,SYN1,RAP1B,SNCG,RAB3A,ATP1A2,CAMK2A,SYT1	8
BP	GO:0051928	positive regulation of calcium ion transport	9/226	129/18614	2.84e-05	0.000884735	0.000684086	PPP3CA,PLP1,LGALS3,PPP3CB,HSPA2,CAMK2A,THY1,ATP2B1,ATP1B1	9
BP	GO:0007015	actin filament organization	17/226	442/18614	3.02e-05	0.0009237	0.000714214	CYFIP1,RNH1,DPYSL3,ALDOA,TMOD2,FSCN1,GSN,SPTAN1,WDR1,TF,STMN1,RHOA,HSP90B1,ARPC3,SPTBN2,CAPZA1,BIN1	17
BP	GO:0030833	regulation of actin filament polymerization	9/226	130/18614	3.02e-05	0.0009237	0.000714214	CYFIP1,TMOD2,GSN,SPTAN1,RHOA,ARPC3,SPTBN2,CAPZA1,BIN1	9
BP	GO:0007040	lysosome organization	8/226	101/18614	3.2e-05	0.000961663	0.000743568	GAA,ATP6V1H,RAB7A,RAB14,TPP1,VPS35,ATP6V0A1,ATP6V1A	8
BP	GO:0007041	lysosomal transport	9/226	132/18614	3.41e-05	0.000987096	0.000763232	HSPA1A,HSPA8,LRP1,VCP,RAB7A,CLU,LAMP2,VPS35,BIN1	9
BP	GO:0061684	chaperone-mediated autophagy	4/226	16/18614	3.43e-05	0.000987096	0.000763232	HSPA8,EEF1A1,CLU,LAMP2	4
BP	GO:0097091	synaptic vesicle clustering	4/226	16/18614	3.43e-05	0.000987096	0.000763232	SYN1,SYN2,RAB3A,CTBP1	4
BP	GO:0007034	vacuolar transport	10/226	165/18614	3.46e-05	0.000987096	0.000763232	HSPA1A,HSPA8,LRP1,VCP,RAB7A,CLU,LAMP2,ATP6V0D1,VPS35,BIN1	10
BP	GO:0007626	locomotory behavior	11/226	201/18614	3.61e-05	0.00102307	0.000791047	GAA,PPP3CB,NEGR1,HPRT1,SNAP25,SNCG,ATP1A2,UCHL1,SOD2,VPS35,TNR	11
BP	GO:0006836	neurotransmitter transport	11/226	202/18614	3.78e-05	0.00106176	0.000820964	SEPTIN5,SYN1,SYN2,RAP1B,SNAP25,SNCG,RAB3A,ATP1A2,CAMK2A,SYT1,VAMP2	11
BP	GO:0032984	protein-containing complex disassembly	12/226	240/18614	3.89e-05	0.00107405	0.000830463	NSF,HSPA8,VCP,TMOD2,GSN,SPTAN1,LAMP2,WDR1,MAP1A,STMN1,SPTBN2,CAPZA1	12
BP	GO:0071868	cellular response to monoamine stimulus	8/226	104/18614	3.95e-05	0.00107405	0.000830463	SIRT2,MAPK1,GNA11,GNAS,GNAO1,VPS35,GNB1,NHERF1	8
BP	GO:0072594	establishment of protein localization to organelle	17/226	453/18614	4.1e-05	0.00110628	0.000855386	CCT8,MAPT,CCT6A,PPP3CA,CCT2,HSPA8,TCP1,HSPA5,RAB7A,CLU,HK1,CCT3,LAMP2,RAB10,CCT7,NPEPPS,LMNA	17
BP	GO:0030834	regulation of actin filament depolymerization	6/226	53/18614	4.27e-05	0.00114333	0.000884033	TMOD2,GSN,SPTAN1,WDR1,SPTBN2,CAPZA1	6
BP	GO:0006816	calcium ion transport	17/226	455/18614	4.33e-05	0.00115038	0.000889484	YWHAE,PPP3CA,PLP1,LGALS3,PPP3CB,HSPA2,ATP1A2,GPM6A,RHOA,CAMK2A,ANXA6,THY1,CAMK2B,SLC3A2,ATP2B1,ATP1B1,BIN1	17
BP	GO:0055119	relaxation of cardiac muscle	4/226	17/18614	4.45e-05	0.0011717	0.000905967	ATP1A2,GSN,ATP1A1,ATP1B1	4
BP	GO:1904951	positive regulation of establishment of protein localization	14/226	325/18614	4.6e-05	0.00118414	0.000915587	CCT8,YWHAE,GNA11,CCT6A,CCT2,TCP1,PPP3CB,PPIA,CCT3,VPS35,CCT7,CD81,NPEPPS,VAMP2	14
BP	GO:0072659	protein localization to plasma membrane	13/226	285/18614	4.81e-05	0.00121992	0.000943256	NSF,LGALS3,LRP1,RAB3A,RAB7A,VPS35,RAB10,CD81,NFASC,CLTC,VAMP2,ATP1B1,NHERF1	13
BP	GO:2001242	regulation of intrinsic apoptotic signaling pathway	10/226	173/18614	5.17e-05	0.00129159	0.000998671	MIF,HSPA1A,RPS7,RPS3,PPIA,CLU,P4HB,SOD2,CD44,NHERF1	10
BP	GO:0042743	hydrogen peroxide metabolic process	6/226	55/18614	5.29e-05	0.00130691	0.00101052	COX2,PRDX5,HBB,SOD2,PRDX3,PRDX1	6
BP	GO:0032272	negative regulation of protein polymerization	7/226	80/18614	5.31e-05	0.00130691	0.00101052	TUBB4A,TMOD2,GSN,SPTAN1,STMN1,SPTBN2,CAPZA1	7
BP	GO:0046928	regulation of neurotransmitter secretion	7/226	82/18614	6.22e-05	0.00152129	0.00117627	SEPTIN5,SYN1,RAP1B,SNCG,RAB3A,CAMK2A,SYT1	7
BP	GO:0030100	regulation of endocytosis	11/226	214/18614	6.38e-05	0.00154936	0.00119798	PPP3CA,VTN,LGALS3,LRP1,PPP3CB,CLU,SNAP91,TF,RAB5B,C3,BIN1	11
BP	GO:1905146	lysosomal protein catabolic process	4/226	19/18614	7.11e-05	0.00171279	0.00132435	LRP1,LAMP2,TPP1,VPS35	4
BP	GO:1901879	regulation of protein depolymerization	7/226	86/18614	8.44e-05	0.00200602	0.00155108	TMOD2,GSN,SPTAN1,WDR1,MAP1A,SPTBN2,CAPZA1	7
BP	GO:0034502	protein localization to chromosome	8/226	116/18614	8.61e-05	0.00203058	0.00157007	CCT8,CCT6A,CCT2,TCP1,VCP,CCT3,TPP1,CCT7	8
BP	GO:0023061	signal release	17/226	483/18614	9.02e-05	0.00211428	0.00163478	SEPTIN5,SYN1,GNA11,MIF,SYN2,PPP3CA,RAP1B,PPP3CB,SNAP25,SNCG,RAB3A,CPE,CAMK2A,VPS35,SYT1,VAMP2,RAB1A	17
BP	GO:0046785	microtubule polymerization	7/226	87/18614	9.09e-05	0.00211495	0.0016353	MAPT,HSPA1A,RPS3,TUBB4A,TPPP,TPPP3,STMN1	7
BP	GO:0032273	positive regulation of protein polymerization	7/226	88/18614	9.77e-05	0.00225883	0.00174655	MAPT,HSPA1A,RPS3,TPPP,TPPP3,RHOA,BIN1	7
BP	GO:0032200	telomere organization	10/226	187/18614	9.91e-05	0.00227615	0.00175994	CCT8,SIRT2,MAPK1,CCT6A,CCT2,TCP1,HNRNPC,CCT3,HSP90AB1,CCT7	10
BP	GO:0048675	axon extension	8/226	119/18614	0.000102977	0.00234842	0.00181582	CYFIP1,MAPT,L1CAM,PPP3CB,NRCAM,PLXNA4,HSP90AB1,TNR	8
BP	GO:0046718	viral entry into host cell	9/226	153/18614	0.000107351	0.00243187	0.00188034	HSPA1A,MOG,LGALS1,GSN,P4HB,CD81,SLC3A2,RPSA,NCAM1	9
BP	GO:0110053	regulation of actin filament organization	12/226	268/18614	0.000111966	0.0025024	0.00193488	CYFIP1,RNH1,TMOD2,GSN,SPTAN1,WDR1,STMN1,RHOA,ARPC3,SPTBN2,CAPZA1,BIN1	12
BP	GO:0045055	regulated exocytosis	11/226	228/18614	0.00011237	0.0025024	0.00193488	SEPTIN5,SYN1,SYN2,PTGDS,RAP1B,PPP3CB,SNAP25,RAB3A,RAB10,SYT1,VAMP2	11
BP	GO:1903351	cellular response to dopamine	7/226	90/18614	0.000112674	0.0025024	0.00193488	MAPK1,GNA11,GNAS,GNAO1,VPS35,GNB1,NHERF1	7
BP	GO:0051693	actin filament capping	5/226	40/18614	0.000117468	0.00259192	0.0020041	TMOD2,GSN,SPTAN1,SPTBN2,CAPZA1	5
BP	GO:0043270	positive regulation of monoatomic ion transport	11/226	231/18614	0.00012611	0.00271216	0.00209707	ACTN4,PPP3CA,PLP1,LGALS3,PPP3CB,HSPA2,CAMK2A,THY1,ATP2B1,ATP1B1,NHERF1	11
BP	GO:0050807	regulation of synapse organization	11/226	234/18614	0.000141256	0.00301879	0.00233416	CYFIP1,TUBB,HSPA8,VCP,NEGR1,GPM6A,NRCAM,RHOA,VPS35,CAMK2B,ICAM5	11
BP	GO:0010639	negative regulation of organelle organization	14/226	362/18614	0.000144487	0.00306855	0.00237263	MAPT,HSPA1A,TUBB4A,TMOD2,RAB7A,HNRNPC,CLU,GSN,SPTAN1,STMN1,SPTBN2,VAT1,CAPZA1,LMNA	14
BP	GO:0045429	positive regulation of nitric oxide biosynthetic process	5/226	42/18614	0.000148897	0.00313436	0.00242352	DDAH2,HBB,CLU,SOD2,HSP90AB1	5
BP	GO:0021700	developmental maturation	13/226	319/18614	0.000149431	0.00313436	0.00242352	SIRT2,ATP6V1H,RAB3A,ATP6V0D1,NRCAM,RHOA,ATP6V1B2,C3,VPS35,CAMK2B,BCAN,ATP6V0A1,ATP6V1A	13
BP	GO:0051131	chaperone-mediated protein complex assembly	4/226	23/18614	0.000156296	0.00319936	0.00247378	HSPA1A,CCT2,CLU,HSP90AB1	4
BP	GO:0072593	reactive oxygen species metabolic process	11/226	237/18614	0.000157924	0.00320785	0.00248034	COX2,CBR1,SIRT2,MAPT,PRDX5,HBB,GSTP1,RHOA,SOD2,PRDX3,PRDX1	11
BP	GO:0071897	DNA biosynthetic process	10/226	198/18614	0.000158599	0.00320785	0.00248034	CCT8,MAPK1,CCT6A,CCT2,TCP1,VCP,HNRNPC,CCT3,HSP90AB1,CCT7	10
BP	GO:0031109	microtubule polymerization or depolymerization	8/226	127/18614	0.00016201	0.00325746	0.0025187	MAPT,HSPA1A,RPS3,TUBB4A,TPPP,TPPP3,MAP1A,STMN1	8
BP	GO:0045807	positive regulation of endocytosis	7/226	96/18614	0.000169045	0.00335915	0.00259733	PPP3CA,VTN,LRP1,CLU,TF,C3,BIN1	7
BP	GO:0016079	synaptic vesicle exocytosis	7/226	97/18614	0.000180339	0.00354215	0.00273882	SEPTIN5,SYN1,RAP1B,SNAP25,RAB3A,SYT1,VAMP2	7
BP	GO:0098869	cellular oxidant detoxification	7/226	99/18614	0.000204757	0.00395321	0.00305666	PRDX5,HBB,PRDX6,GSTP1,SOD2,PRDX3,PRDX1	7
BP	GO:1902904	negative regulation of supramolecular fiber organization	9/226	167/18614	0.000208198	0.00399693	0.00309047	HSPA8,TUBB4A,TMOD2,CLU,GSN,SPTAN1,STMN1,SPTBN2,CAPZA1	9
BP	GO:2000300	regulation of synaptic vesicle exocytosis	5/226	46/18614	0.000230662	0.00437543	0.00338313	SEPTIN5,SYN1,RAP1B,RAB3A,SYT1	5
BP	GO:0061337	cardiac conduction	7/226	101/18614	0.000231777	0.00437543	0.00338313	YWHAE,ATP1A2,ATP1A1,ATP1A3,ATP2B1,ATP1B1,BIN1	7
BP	GO:0050767	regulation of neurogenesis	14/226	381/18614	0.000244667	0.00456801	0.00353203	CYFIP1,SIRT2,NPTN,MAPT,L1CAM,PPP3CA,PTPRZ1,MAP6,PLXNA4,THY1,CAMK2B,BIN1,DPYSL5,TNR	14
BP	GO:2001233	regulation of apoptotic signaling pathway	14/226	381/18614	0.000244667	0.00456801	0.00353203	MIF,HSPA1A,RPS7,RPS3,LGALS3,PPIA,PDIA3,CLU,P4HB,GSTP1,SOD2,CD44,LMNA,NHERF1	14
BP	GO:1902905	positive regulation of supramolecular fiber organization	9/226	171/18614	0.000248398	0.00461234	0.00356631	CYFIP1,MAPT,HSPA1A,RPS3,CLU,GSN,WDR1,RHOA,BIN1	9
BP	GO:1990138	neuron projection extension	9/226	172/18614	0.000259396	0.00479037	0.00370396	CYFIP1,MAPT,L1CAM,PPP3CB,NRCAM,PLXNA4,HSP90AB1,SYT1,TNR	9
BP	GO:0006979	response to oxidative stress	15/226	434/18614	0.000284712	0.00520136	0.00402174	SIRT2,MAPK1,MAPT,HSPA1A,GSS,RPS3,PRDX5,HBB,PRDX6,PPIA,P4HB,GSTP1,SOD2,PRDX3,PRDX1	15
BP	GO:0022411	cellular component disassembly	16/226	488/18614	0.000322607	0.00586212	0.00453265	NSF,HSPA8,LRP1,VCP,HSPA2,TMOD2,FSCN1,GSN,SPTAN1,LAMP2,WDR1,MAP1A,STMN1,SPTBN2,C3,CAPZA1	16
BP	GO:1904062	regulation of monoatomic cation transmembrane transport	13/226	346/18614	0.000328945	0.0059455	0.00459712	ACTN4,YWHAE,PPP3CA,PLP1,PPP3CB,HSPA2,ATP1A2,GNB2,THY1,VAMP2,ATP1B1,BIN1,NHERF1	13
BP	GO:0009266	response to temperature stimulus	9/226	183/18614	0.000409402	0.00731357	0.00565493	COX2,MAPT,YWHAE,HSPA1A,VCP,HSPA2,SOD2,HSP90AB1,ATP2B1	9
BP	GO:0061025	membrane fusion	9/226	183/18614	0.000409402	0.00731357	0.00565493	NSF,VAPA,SEPTIN8,SNAP25,RAB3A,RAB7A,VAMP1,SYT1,VAMP2	9
BP	GO:0086009	membrane repolarization	5/226	52/18614	0.000412274	0.00731357	0.00565493	YWHAE,ATP1A2,ATP1A1,WDR1,ATP1B1	5
BP	GO:0140115	export across plasma membrane	6/226	80/18614	0.000426124	0.00750243	0.00580096	YWHAE,ATP1A2,ATP1A1,ATP1A3,ATP2B1,ATP1B1	6
BP	GO:0003012	muscle system process	15/226	452/18614	0.000436585	0.00764698	0.00591272	GAA,PPP3CA,ALDOA,TMOD2,ATP1A2,GSN,ATP1A1,RHOA,ANXA6,GNAO1,CAMK2B,ATP2B1,ATP1B1,BIN1,LMNA	15
BP	GO:0010823	negative regulation of mitochondrion organization	5/226	53/18614	0.000450768	0.00784413	0.00606516	MAPT,HSPA1A,CLU,VAT1,LMNA	5
BP	GO:0042744	hydrogen peroxide catabolic process	4/226	30/18614	0.000452557	0.00784413	0.00606516	PRDX5,HBB,PRDX3,PRDX1	4
BP	GO:1903169	regulation of calcium ion transmembrane transport	9/226	186/18614	0.000460857	0.00784413	0.00606516	YWHAE,PPP3CA,PLP1,PPP3CB,HSPA2,ATP1A2,THY1,ATP1B1,BIN1	9
BP	GO:0071801	regulation of podosome assembly	3/226	13/18614	0.000461691	0.00784413	0.00606516	FSCN1,GSN,RHOA	3
BP	GO:0098693	regulation of synaptic vesicle cycle	3/226	13/18614	0.000461691	0.00784413	0.00606516	SYN1,SCRN1,ARHGDIA	3
BP	GO:1904350	regulation of protein catabolic process in the vacuole	3/226	13/18614	0.000461691	0.00784413	0.00606516	LRP1,VPS35,CD81	3
BP	GO:0031113	regulation of microtubule polymerization	5/226	54/18614	0.000491909	0.00823402	0.00636663	MAPT,HSPA1A,RPS3,TUBB4A,STMN1	5
BP	GO:0097479	synaptic vesicle localization	5/226	54/18614	0.000491909	0.00823402	0.00636663	SYN1,SYN2,RAB3A,SNAP91,CTBP1	5
BP	GO:1903170	negative regulation of calcium ion transmembrane transport	5/226	54/18614	0.000491909	0.00823402	0.00636663	YWHAE,PPP3CA,PPP3CB,ATP1A2,BIN1	5
BP	GO:0051960	regulation of nervous system development	15/226	461/18614	0.000535624	0.00883829	0.00683386	CYFIP1,SIRT2,NPTN,MAPT,L1CAM,PPP3CA,PTPRZ1,TPPP,MAP6,PLXNA4,THY1,CAMK2B,BIN1,DPYSL5,TNR	15
BP	GO:0061462	protein localization to lysosome	5/226	55/18614	0.000535812	0.00883829	0.00683386	HSPA8,RAB7A,CLU,LAMP2,CD81	5
BP	GO:0048388	endosomal lumen acidification	3/226	14/18614	0.000582356	0.00947312	0.00732471	ATP6V1H,ATP6V0A1,ATP6V1A	3
BP	GO:0006622	protein targeting to lysosome	4/226	32/18614	0.000582661	0.00947312	0.00732471	HSPA8,RAB7A,CLU,LAMP2	4
BP	GO:0016236	macroautophagy	12/226	322/18614	0.000596977	0.00965966	0.00746895	GAA,ATP6V1H,VCP,RAB7A,LAMP2,ATP6V0D1,UCHL1,ATP6V1B2,VPS35,ATP6V0A1,ATP6V1A,RAB1A	12
BP	GO:0034764	positive regulation of transmembrane transport	10/226	235/18614	0.000619249	0.00997254	0.00771087	ACTN4,CA2,PPP3CA,PLP1,PPP3CB,HSPA2,C3,THY1,ATP1B1,NHERF1	10
BP	GO:0017157	regulation of exocytosis	9/226	194/18614	0.000624588	0.00997449	0.00771237	NSF,SEPTIN5,SYN1,RAP1B,RAB3A,RAB7A,SEPTIN2,SYT1,VAMP2	9
BP	GO:0021782	glial cell development	7/226	119/18614	0.000628175	0.00997449	0.00771237	SIRT2,MAPT,PLP1,TPPP,LRP1,CLU,PHGDH	7
BP	GO:0048168	regulation of neuronal synaptic plasticity	5/226	57/18614	0.000632375	0.00999447	0.00772782	NPTN,RAB3A,CAMK2A,CAMK2B,NCDN	5
BP	GO:0048284	organelle fusion	8/226	156/18614	0.000649385	0.0102158	0.00789895	SEPTIN8,SNAP25,RAB3A,RAB7A,VAMP1,VAT1,SYT1,VAMP2	8
BP	GO:0006906	vesicle fusion	7/226	120/18614	0.000660325	0.01034	0.007995	SEPTIN8,SNAP25,RAB3A,RAB7A,VAMP1,SYT1,VAMP2	7
BP	GO:0031110	regulation of microtubule polymerization or depolymerization	6/226	88/18614	0.000709179	0.0109885	0.0084964	MAPT,HSPA1A,RPS3,TUBB4A,MAP1A,STMN1	6
BP	GO:0098760	response to interleukin-7	3/226	15/18614	0.000721444	0.0109885	0.0084964	PDIA3,ATP5F1B,P4HB	3
BP	GO:0007051	spindle organization	9/226	198/18614	0.000722736	0.0109885	0.0084964	HSPA1A,TUBB,RPS3,GNAI1,TPPP,VCP,STMN1,RHOA,CLTC	9
BP	GO:0002181	cytoplasmic translation	8/226	159/18614	0.000735823	0.0109885	0.0084964	SH3BGRL,RPS18,RPS7,RPS3,RPS4X,PKM,RPSA,EIF4A1	8
BP	GO:0051092	positive regulation of NF-kappaB transcription factor activity	8/226	159/18614	0.000735823	0.0109885	0.0084964	HSPA1A,UBE2V1,UBE2N,RPS3,PPIA,CLU,CAMK2A,PRDX3	8
BP	GO:0009112	nucleobase metabolic process	4/226	34/18614	0.000737308	0.0109885	0.0084964	MAPK1,PRPS1,GDA,HPRT1	4
BP	GO:0051973	positive regulation of telomerase activity	4/226	34/18614	0.000737308	0.0109885	0.0084964	MAPK1,CCT2,TCP1,HSP90AB1	4
BP	GO:0030516	regulation of axon extension	6/226	90/18614	0.000798584	0.0117495	0.00908486	CYFIP1,MAPT,L1CAM,NRCAM,PLXNA4,TNR	6
BP	GO:0070482	response to oxygen levels	12/226	333/18614	0.00080086	0.0117495	0.00908486	ACTN4,SIRT2,P4HB,ATP6V0D1,RHOA,HSP90B1,SOD2,NPEPPS,ATP6V1A,HP1BP3,ATP1B1,LMNA	12
BP	GO:0016052	carbohydrate catabolic process	8/226	162/18614	0.000831295	0.0121234	0.0093739	GAA,PYGB,ALDOA,ALDOC,TPI1,PKM,PGD,HK1	8
BP	GO:0007338	single fertilization	8/226	163/18614	0.000865243	0.0125115	0.00967406	CCT8,CCT2,TCP1,ALDOA,RAB3A,IGSF8,CCT3,CCT7	8
BP	GO:0042391	regulation of membrane potential	14/226	433/18614	0.00086898	0.0125115	0.00967406	MAPT,YWHAE,GNA11,PPP3CA,VCP,ATP1A2,ATP1A1,WDR1,NRCAM,SOD2,PRDX3,ATP1A3,ATP1B1,BIN1	14
BP	GO:0034599	cellular response to oxidative stress	11/226	290/18614	0.000869071	0.0125115	0.00967406	SIRT2,MAPK1,MAPT,HSPA1A,RPS3,PRDX5,PPIA,P4HB,SOD2,PRDX3,PRDX1	11
BP	GO:0006735	NADH regeneration	3/226	16/18614	0.000880006	0.0125115	0.00967406	TPI1,PKM,HK1	3
BP	GO:0035966	response to topologically incorrect protein	8/226	164/18614	0.000900295	0.0127467	0.00985586	HSPA1A,HSPA8,HSPA5,VCP,HSPA2,HSPA9,CLU,HSP90AB1	8
BP	GO:0000302	response to reactive oxygen species	9/226	205/18614	0.00092462	0.0130123	0.0100612	MAPK1,MAPT,RPS3,PRDX5,HBB,GSTP1,SOD2,PRDX3,PRDX1	9
BP	GO:0061951	establishment of protein localization to plasma membrane	5/226	62/18614	0.000930542	0.0130123	0.0100612	NSF,RAB7A,VPS35,RAB10,VAMP2	5
BP	GO:1904427	positive regulation of calcium ion transmembrane transport	6/226	93/18614	0.000948717	0.0132121	0.0102157	PPP3CA,PLP1,PPP3CB,HSPA2,THY1,ATP1B1	6
BP	GO:0044282	small molecule catabolic process	13/226	388/18614	0.000958	0.0132869	0.0102735	DLST,GDA,DDAH2,ALDH5A1,HAGH,TPI1,IMPA1,GOT2,PKM,ETFA,PGD,HK1,QDPR	13
BP	GO:0019079	viral genome replication	7/226	129/18614	0.0010123	0.0139829	0.0108117	VAPA,HSPA8,VCP,EEF1A1,PPIA,CTBP1,PCBP1	7
BP	GO:0045732	positive regulation of protein catabolic process	9/226	209/18614	0.00105915	0.014512	0.0112208	SIRT2,NSF,HSPA1A,LRP1,VCP,RAB7A,CLU,VPS35,CD81	9
BP	GO:0071383	cellular response to steroid hormone stimulus	9/226	209/18614	0.00105915	0.014512	0.0112208	PADI2,HSPA1A,HSPA8,ATP5F1A,ATP1A2,ATP1A1,RHOA,ATP1A3,ATP2B1	9
BP	GO:0090257	regulation of muscle system process	10/226	254/18614	0.00112097	0.0152975	0.0118282	PPP3CA,ATP1A2,ATP1A1,RHOA,ANXA6,CAMK2B,ATP2B1,ATP1B1,BIN1,LMNA	10
BP	GO:1902229	regulation of intrinsic apoptotic signaling pathway in response to DNA damage	4/226	38/18614	0.00112989	0.0153575	0.0118746	MIF,RPS3,CLU,CD44	4
BP	GO:0030705	cytoskeleton-dependent intracellular transport	9/226	212/18614	0.0011701	0.0157155	0.0121513	ACTN4,MAPT,TUBB,HSPA8,PURA,MAP6,UCHL1,MAP1A,RAB1A	9
BP	GO:0006936	muscle contraction	12/226	349/18614	0.00119898	0.0160399	0.0124022	GAA,ALDOA,TMOD2,ATP1A2,GSN,ATP1A1,RHOA,ANXA6,GNAO1,ATP2B1,ATP1B1,BIN1	12
BP	GO:0034620	cellular response to unfolded protein	6/226	98/18614	0.00124614	0.0165122	0.0127674	HSPA1A,HSPA8,HSPA5,VCP,HSPA2,HSPA9	6
BP	GO:0097242	amyloid-beta clearance	4/226	39/18614	0.00124716	0.0165122	0.0127674	LRP1,CLU,C3,CLTC	4
BP	GO:0090083	regulation of inclusion body assembly	3/226	18/18614	0.00125953	0.0165122	0.0127674	HSPA1A,HSPA2,CLU	3
BP	GO:0099010	modification of postsynaptic structure	3/226	18/18614	0.00125953	0.0165122	0.0127674	CYFIP1,RAP1B,RHOA	3
BP	GO:1900180	regulation of protein localization to nucleus	7/226	134/18614	0.00126344	0.0165122	0.0127674	CCT8,CCT6A,CCT2,TCP1,CCT3,CCT7,LMNA	7
BP	GO:0051648	vesicle localization	9/226	215/18614	0.00129028	0.0167984	0.0129887	ACTN4,SEPTIN5,SYN1,SYN2,RAB3A,RAB7A,SNAP91,CTBP1,RAB1A	9
BP	GO:2001243	negative regulation of intrinsic apoptotic signaling pathway	6/226	99/18614	0.00131332	0.0170212	0.0131609	MIF,HSPA1A,PPIA,CLU,SOD2,CD44	6
BP	GO:0031346	positive regulation of cell projection organization	12/226	353/18614	0.00132077	0.0170212	0.0131609	CYFIP1,NPTN,MAPT,L1CAM,DPYSL3,HSPA5,NEGR1,FSCN1,GPM6A,MAP6,PLXNA4,CAMK2B	12
BP	GO:0034605	cellular response to heat	5/226	67/18614	0.00132242	0.0170212	0.0131609	MAPT,YWHAE,HSPA1A,VCP,HSP90AB1	5
BP	GO:0034767	positive regulation of monoatomic ion transmembrane transport	8/226	175/18614	0.00136641	0.0174438	0.0134877	ACTN4,PPP3CA,PLP1,PPP3CB,HSPA2,THY1,ATP1B1,NHERF1	8
BP	GO:0045454	cell redox homeostasis	4/226	40/18614	0.00137268	0.0174438	0.0134877	PRDX5,PRDX6,PRDX3,PRDX1	4
BP	GO:0099622	cardiac muscle cell membrane repolarization	4/226	40/18614	0.00137268	0.0174438	0.0134877	YWHAE,ATP1A1,WDR1,ATP1B1	4
BP	GO:0007033	vacuole organization	9/226	217/18614	0.00137579	0.0174438	0.0134877	GAA,ATP6V1H,RAB7A,RAB14,TPP1,VPS35,ATP6V0A1,ATP6V1A,RAB1A	9
BP	GO:1901019	regulation of calcium ion transmembrane transporter activity	6/226	100/18614	0.00138324	0.0174731	0.0135104	YWHAE,PPP3CA,PPP3CB,HSPA2,ATP1A2,ATP1B1	6
BP	GO:0048709	oligodendrocyte differentiation	6/226	101/18614	0.00145597	0.0183236	0.014168	PLP1,VTN,PTPRZ1,TPPP,CLU,WDR1	6
BP	GO:0008361	regulation of cell size	8/226	178/18614	0.00152212	0.0189456	0.0146489	CYFIP1,MAPT,L1CAM,NRCAM,RHOA,PLXNA4,TNR,NHERF1	8
BP	GO:1904063	negative regulation of cation transmembrane transport	6/226	102/18614	0.00153157	0.0189937	0.0146861	YWHAE,PPP3CA,PPP3CB,ATP1A2,BIN1,NHERF1	6
BP	GO:0070588	calcium ion transmembrane transport	12/226	360/18614	0.00155851	0.0192575	0.0148901	YWHAE,PPP3CA,PLP1,PPP3CB,HSPA2,ATP1A2,GPM6A,ANXA6,THY1,ATP2B1,ATP1B1,BIN1	12
BP	GO:0042176	regulation of protein catabolic process	12/226	361/18614	0.00159519	0.0196393	0.0151853	SIRT2,NSF,HSPA1A,LRP1,VCP,EEF1A1,RAB7A,CLU,MAP1A,VPS35,HSP90AB1,CD81	12
BP	GO:2000379	positive regulation of reactive oxygen species metabolic process	5/226	70/18614	0.00160934	0.019671	0.0152098	COX2,CBR1,MAPT,GSTP1,SOD2	5
BP	GO:0050852	T cell receptor signaling pathway	7/226	140/18614	0.00162648	0.0198093	0.0153167	MAPK1,MOG,UBE2N,RPS3,LGALS3,THY1,CD81	7
BP	GO:1901020	negative regulation of calcium ion transmembrane transporter activity	4/226	42/18614	0.00164969	0.0200202	0.0154798	YWHAE,PPP3CA,PPP3CB,ATP1A2	4
BP	GO:0006144	purine nucleobase metabolic process	3/226	20/18614	0.00172843	0.0207533	0.0160467	PRPS1,GDA,HPRT1	3
BP	GO:0044794	positive regulation by host of viral process	3/226	20/18614	0.00172843	0.0207533	0.0160467	VAPA,HSPA8,EEF1A1	3
BP	GO:0045056	transcytosis	3/226	20/18614	0.00172843	0.0207533	0.0160467	LRP1,VPS35,CLTC	3
BP	GO:0001508	action potential	7/226	142/18614	0.00176399	0.0208864	0.0161496	YWHAE,GNA11,ATP1A2,ATP1A1,NRCAM,ATP1B1,BIN1	7
BP	GO:0006986	response to unfolded protein	7/226	142/18614	0.00176399	0.0208864	0.0161496	HSPA1A,HSPA8,HSPA5,VCP,HSPA2,HSPA9,HSP90AB1	7
BP	GO:0007411	axon guidance	9/226	225/18614	0.00176466	0.0208864	0.0161496	CYFIP1,L1CAM,TUBB3,NRCAM,PLXNA4,NFASC,NCAM1,DPYSL5,TNR	9
BP	GO:0050890	cognition	11/226	317/18614	0.00177146	0.0208864	0.0161496	CYFIP1,MAPK1,NPTN,MAPT,PTPRZ1,PPP3CB,SNAP25,TMOD2,ATP1A2,MAP1A,TNR	11
BP	GO:0007163	establishment or maintenance of cell polarity	9/226	226/18614	0.0018189	0.0213039	0.0164724	RAP1B,FSCN1,GSN,WDR1,RHOA,HSP90AB1,RAB10,LMNA,NHERF1	9
BP	GO:0006754	ATP biosynthetic process	6/226	106/18614	0.00186425	0.0216942	0.0167742	COX2,ATP5F1A,ALDOA,VCP,ATP5F1B,ATP6V1A	6
BP	GO:0042552	myelination	7/226	144/18614	0.00191038	0.0220798	0.0170723	CYFIP1,SIRT2,PLP1,PTPRZ1,TPPP,CLU,NFASC	7
BP	GO:0044275	cellular carbohydrate catabolic process	4/226	44/18614	0.00196332	0.0225384	0.0174269	GAA,PYGB,TPI1,PGD	4
BP	GO:0050856	regulation of T cell receptor signaling pathway	4/226	44/18614	0.00196332	0.0225384	0.0174269	RPS3,LGALS3,THY1,CD81	4
BP	GO:0048791	calcium ion-regulated exocytosis of neurotransmitter	3/226	21/18614	0.00199855	0.0227889	0.0176206	SNAP25,RAB3A,SYT1	3
BP	GO:0007611	learning or memory	10/226	276/18614	0.00207429	0.023349	0.0180537	MAPK1,NPTN,MAPT,PTPRZ1,PPP3CB,SNAP25,TMOD2,ATP1A2,MAP1A,TNR	10
BP	GO:0008217	regulation of blood pressure	8/226	187/18614	0.00207516	0.023349	0.0180537	GNA11,NCALD,HBB,ATP1A2,ATP1A1,RHOA,SOD2,ATP2B1	8
BP	GO:1901021	positive regulation of calcium ion transmembrane transporter activity	4/226	45/18614	0.00213461	0.0237816	0.0183882	PPP3CA,PPP3CB,HSPA2,ATP1B1	4
BP	GO:0050769	positive regulation of neurogenesis	9/226	232/18614	0.00217302	0.0240519	0.0185972	CYFIP1,NPTN,MAPT,L1CAM,PTPRZ1,MAP6,PLXNA4,CAMK2B,BIN1	9
BP	GO:0051651	maintenance of location in cell	9/226	233/18614	0.00223704	0.0246002	0.0190212	GAA,HSPA5,FTL,ATP1A2,GSN,HK1,HSP90B1,ANXA6,THY1	9
BP	GO:2001234	negative regulation of apoptotic signaling pathway	9/226	233/18614	0.00223704	0.0246002	0.0190212	MIF,HSPA1A,LGALS3,PPIA,CLU,GSTP1,SOD2,CD44,LMNA	9
BP	GO:0009408	response to heat	6/226	110/18614	0.002249	0.0246519	0.0190611	MAPT,YWHAE,HSPA1A,VCP,HSPA2,HSP90AB1	6
BP	GO:0051495	positive regulation of cytoskeleton organization	8/226	190/18614	0.00229102	0.0248384	0.0192053	CYFIP1,MAPT,HSPA1A,RPS3,GSN,WDR1,RHOA,BIN1	8
BP	GO:0035089	establishment of apical/basal cell polarity	3/226	22/18614	0.00229353	0.0248384	0.0192053	FSCN1,RHOA,NHERF1	3
BP	GO:0016358	dendrite development	9/226	234/18614	0.00230256	0.0248384	0.0192053	CYFIP1,PPP3CA,HPRT1,MAP6,MAP1A,RHOA,CAMK2A,CAMK2B,DPYSL5	9
BP	GO:0050772	positive regulation of axonogenesis	5/226	76/18614	0.00231674	0.0248433	0.0192091	CYFIP1,MAPT,L1CAM,MAP6,PLXNA4	5
BP	GO:0098876	vesicle-mediated transport to the plasma membrane	7/226	149/18614	0.00231763	0.0248433	0.0192091	NSF,SNAP25,RAB7A,RAB14,VPS35,RAB10,VAMP2	7
BP	GO:0008637	apoptotic mitochondrial changes	6/226	111/18614	0.00235389	0.0251526	0.0194483	HSPA1A,CLU,CAMK2A,SOD2,VPS35,LMNA	6
BP	GO:2000377	regulation of reactive oxygen species metabolic process	7/226	150/18614	0.00240656	0.0256347	0.019821	COX2,CBR1,SIRT2,MAPT,GSTP1,RHOA,SOD2	7
BP	GO:0055001	muscle cell development	8/226	192/18614	0.00244446	0.0259572	0.0200703	ACTN4,PPP3CA,PPP3CB,TMOD2,UCHL1,WDR1,BIN1,LMNA	8
BP	GO:0009063	amino acid catabolic process	6/226	113/18614	0.0025747	0.026675	0.0206254	DLST,DDAH2,ALDH5A1,GOT2,ETFA,QDPR	6
BP	GO:0046390	ribose phosphate biosynthetic process	9/226	238/18614	0.00258006	0.026675	0.0206254	COX2,PRPS1,ATP5F1A,ALDOA,VCP,HPRT1,ATP5F1B,ATP6V1A,ACOT7	9
BP	GO:0034614	cellular response to reactive oxygen species	7/226	152/18614	0.00259227	0.026675	0.0206254	MAPK1,MAPT,RPS3,PRDX5,SOD2,PRDX3,PRDX1	7
BP	GO:1904064	positive regulation of cation transmembrane transport	7/226	152/18614	0.00259227	0.026675	0.0206254	ACTN4,PPP3CA,PLP1,PPP3CB,HSPA2,THY1,ATP1B1	7
BP	GO:0008088	axo-dendritic transport	5/226	78/18614	0.00259616	0.026675	0.0206254	MAPT,HSPA8,PURA,UCHL1,MAP1A	5
BP	GO:0035493	SNARE complex assembly	3/226	23/18614	0.00261412	0.026675	0.0206254	SEPTIN8,VAMP1,VAMP2	3
BP	GO:0046716	muscle cell cellular homeostasis	3/226	23/18614	0.00261412	0.026675	0.0206254	GAA,ALDOA,LAMP2	3
BP	GO:0090042	tubulin deacetylation	3/226	23/18614	0.00261412	0.026675	0.0206254	SIRT2,MAPT,TPPP	3
BP	GO:0031641	regulation of myelination	4/226	48/18614	0.00270988	0.0275693	0.0213169	CYFIP1,SIRT2,PTPRZ1,TPPP	4
BP	GO:0086001	cardiac muscle cell action potential	5/226	79/18614	0.00274467	0.02784	0.0215262	YWHAE,ATP1A2,ATP1A1,ATP1B1,BIN1	5
BP	GO:0006813	potassium ion transport	9/226	241/18614	0.00280509	0.0283681	0.0219345	NSF,YWHAE,ATP1A2,GNB2,ATP1A1,ATP1A3,VAMP2,ATP1B1,BIN1	9
BP	GO:0015980	energy derivation by oxidation of organic compounds	11/226	337/18614	0.00284509	0.0286873	0.0221813	COX2,GAA,DLST,ATP5F1A,PYGB,VCP,ETFA,ATP5F1B,MDH2,RHOA,SOD2	11
BP	GO:0030010	establishment of cell polarity	7/226	155/18614	0.00289128	0.0289754	0.0224041	RAP1B,FSCN1,GSN,RHOA,HSP90AB1,RAB10,NHERF1	7
BP	GO:0050770	regulation of axonogenesis	7/226	155/18614	0.00289128	0.0289754	0.0224041	CYFIP1,MAPT,L1CAM,MAP6,PLXNA4,THY1,TNR	7
BP	GO:0030859	polarized epithelial cell differentiation	3/226	24/18614	0.00296102	0.029359	0.0227007	RHOA,RAB10,NHERF1	3
BP	GO:0045333	cellular respiration	9/226	243/18614	0.00296355	0.029359	0.0227007	COX2,DLST,ATP5F1A,VCP,ETFA,ATP5F1B,MDH2,RHOA,SOD2	9
BP	GO:0034329	cell junction assembly	13/226	444/18614	0.00313682	0.0307327	0.0237628	NPTN,RAP1B,NEGR1,FSCN1,GPM6A,WDR1,NRCAM,RHOA,SPTBN2,VPS35,THY1,ICAM5,CAPZA1	13
BP	GO:0006692	prostanoid metabolic process	4/226	50/18614	0.00314744	0.0307327	0.0237628	CBR1,MIF,PTGDS,GSTP1	4
BP	GO:0001666	response to hypoxia	10/226	293/18614	0.00318941	0.0309269	0.023913	ACTN4,SIRT2,P4HB,RHOA,HSP90B1,SOD2,NPEPPS,HP1BP3,ATP1B1,LMNA	10
BP	GO:0048193	Golgi vesicle transport	10/226	294/18614	0.00326751	0.0315426	0.024389	NSF,VAPA,VCP,ARF3,RAB14,P4HB,RAB6B,RAB10,VAMP2,RAB1A	10
BP	GO:0060047	heart contraction	9/226	247/18614	0.00330165	0.0317819	0.0245741	GAA,YWHAE,ATP1A2,GSN,ATP1A1,ATP1A3,ATP2B1,ATP1B1,BIN1	9
BP	GO:0016241	regulation of macroautophagy	7/226	159/18614	0.00333027	0.0318317	0.0246126	ATP6V1H,ATP6V0D1,UCHL1,ATP6V1B2,VPS35,ATP6V0A1,ATP6V1A	7
BP	GO:0043113	receptor clustering	4/226	51/18614	0.00338327	0.0322027	0.0248995	GPHN,GSN,THY1,CD81	4
BP	GO:0043281	regulation of cysteine-type endopeptidase activity involved in apoptotic process	8/226	204/18614	0.00354178	0.0334304	0.0258488	MAPT,RPS3,PRDX5,VCP,GSN,RHOA,PRDX3,CD44	8
BP	GO:0033044	regulation of chromosome organization	9/226	250/18614	0.00357461	0.0336127	0.0259897	CCT8,MAPK1,MAPT,CCT6A,CCT2,TCP1,HNRNPC,CCT3,CCT7	9
BP	GO:0070661	leukocyte proliferation	11/226	348/18614	0.00362906	0.0339712	0.0262669	MAPK1,MIF,PPP3CA,RPS3,LGALS3,PPP3CB,HPRT1,PURA,CLU,GSTP1,CD81	11
BP	GO:0002026	regulation of the force of heart contraction	3/226	26/18614	0.00373647	0.0345014	0.0266768	GAA,ATP1A2,ATP1A1	3
BP	GO:0045822	negative regulation of heart contraction	3/226	26/18614	0.00373647	0.0345014	0.0266768	ATP1A2,ATP1A1,BIN1	3
BP	GO:0086013	membrane repolarization during cardiac muscle cell action potential	3/226	26/18614	0.00373647	0.0345014	0.0266768	YWHAE,ATP1A1,ATP1B1	3
BP	GO:0006096	glycolytic process	5/226	85/18614	0.00376781	0.0346028	0.0267552	ALDOA,ALDOC,TPI1,PKM,HK1	5
BP	GO:0072524	pyridine-containing compound metabolic process	5/226	85/18614	0.00376781	0.0346028	0.0267552	PSAT1,VCP,PGLS,PGD,MDH2	5
BP	GO:0048260	positive regulation of receptor-mediated endocytosis	4/226	53/18614	0.00389046	0.035537	0.0274776	VTN,CLU,TF,C3	4
BP	GO:0008306	associative learning	5/226	86/18614	0.00396165	0.0358023	0.0276827	NPTN,SNAP25,ATP1A2,MAP1A,TNR	5
BP	GO:0051054	positive regulation of DNA metabolic process	10/226	303/18614	0.00404116	0.036424	0.0281634	CCT8,MAPK1,CCT6A,CCT2,UBE2N,TCP1,RPS3,CCT3,HSP90AB1,CCT7	10
BP	GO:1903320	regulation of protein modification by small protein conjugation or removal	9/226	255/18614	0.00406866	0.0365749	0.0282801	HSPA1A,UBE2V1,RPS7,UBE2N,RPS3,HSPA5,VCP,PPIA,HSP90AB1	9
BP	GO:0009409	response to cold	4/226	54/18614	0.00416234	0.036836	0.0284819	COX2,HSPA2,SOD2,ATP2B1	4
BP	GO:0048678	response to axon injury	5/226	87/18614	0.00416251	0.036836	0.0284819	DPYSL3,TNC,SOD2,THY1,TNR	5
BP	GO:0048708	astrocyte differentiation	5/226	87/18614	0.00416251	0.036836	0.0284819	MAPK1,MAPT,PLP1,LRP1,BIN1	5
BP	GO:0036296	response to increased oxygen levels	3/226	27/18614	0.00416625	0.036836	0.0284819	ATP6V0D1,SOD2,ATP6V1A	3
BP	GO:0006898	receptor-mediated endocytosis	9/226	256/18614	0.00417359	0.036836	0.0284819	VTN,LRP1,SNAP25,CLU,SNAP91,TF,C3,CD81,CLTC	9
BP	GO:0032413	negative regulation of ion transmembrane transporter activity	5/226	88/18614	0.00437054	0.038276	0.0295954	YWHAE,PPP3CA,PPP3CB,ATP1A2,NHERF1	5
BP	GO:0035304	regulation of protein dephosphorylation	5/226	88/18614	0.00437054	0.038276	0.0295954	YWHAE,LGALS3,PPIA,HSP90B1,HSP90AB1	5
BP	GO:0014888	striated muscle adaptation	4/226	55/18614	0.00444678	0.0388436	0.0300342	PPP3CA,GSN,CAMK2B,LMNA	4
BP	GO:0098739	import across plasma membrane	8/226	212/18614	0.00446285	0.0388841	0.0300655	PPP3CA,PPP3CB,ATP1A2,ATP1A1,ATP1A3,SLC3A2,ATP1B1,NHERF1	8
BP	GO:0055072	iron ion homeostasis	5/226	89/18614	0.00458588	0.0394855	0.0305306	FTL,ATP6V0D1,TF,SOD2,ATP6V1A	5
BP	GO:0008016	regulation of heart contraction	8/226	213/18614	0.00458983	0.0394855	0.0305306	GAA,YWHAE,ATP1A2,ATP1A1,ATP1A3,ATP2B1,ATP1B1,BIN1	8
BP	GO:0031396	regulation of protein ubiquitination	8/226	213/18614	0.00458983	0.0394855	0.0305306	HSPA1A,UBE2V1,RPS7,UBE2N,RPS3,HSPA5,PPIA,HSP90AB1	8
BP	GO:0042398	cellular modified amino acid biosynthetic process	3/226	28/18614	0.00462485	0.0394855	0.0305306	ALDH7A1,CKB,ALDH9A1	3
BP	GO:0042759	long-chain fatty acid biosynthetic process	3/226	28/18614	0.00462485	0.0394855	0.0305306	PLP1,GSTP1,ACOT7	3
BP	GO:0051156	glucose 6-phosphate metabolic process	3/226	28/18614	0.00462485	0.0394855	0.0305306	PGLS,PGD,HK1	3
BP	GO:0051647	nucleus localization	3/226	28/18614	0.00462485	0.0394855	0.0305306	BIN1,LMNA,NHERF1	3
BP	GO:1903522	regulation of blood circulation	9/226	261/18614	0.00473035	0.0400999	0.0310057	GAA,YWHAE,ATP1A2,ATP1A1,RHOA,ATP1A3,ATP2B1,ATP1B1,BIN1	9
BP	GO:0035088	establishment or maintenance of apical/basal cell polarity	4/226	56/18614	0.00474402	0.0400999	0.0310057	FSCN1,WDR1,RHOA,NHERF1	4
BP	GO:0007009	plasma membrane organization	7/226	170/18614	0.00480113	0.0403817	0.0312236	NSF,RAB3A,CLU,GSN,ANXA6,BIN1,NHERF1	7
BP	GO:0050806	positive regulation of synaptic transmission	7/226	170/18614	0.00480113	0.0403817	0.0312236	MAPK1,NPTN,CA2,SNAP25,SYT1,VAMP2,TNR	7
BP	GO:0006749	glutathione metabolic process	4/226	57/18614	0.00505433	0.0419092	0.0324047	GSS,HAGH,GSTP1,SOD2	4
BP	GO:0045010	actin nucleation	4/226	57/18614	0.00505433	0.0419092	0.0324047	CYFIP1,RNH1,GSN,ARPC3	4
BP	GO:0019076	viral release from host cell	3/226	29/18614	0.0051128	0.0419092	0.0324047	VAPA,RAB7A,PPIA	3
BP	GO:0099170	postsynaptic modulation of chemical synaptic transmission	3/226	29/18614	0.0051128	0.0419092	0.0324047	CYFIP1,PPP3CA,INA	3
BP	GO:1902175	regulation of oxidative stress-induced intrinsic apoptotic signaling pathway	3/226	29/18614	0.0051128	0.0419092	0.0324047	PPIA,P4HB,SOD2	3
BP	GO:0071453	cellular response to oxygen levels	7/226	172/18614	0.00511407	0.0419092	0.0324047	SIRT2,P4HB,ATP6V0D1,NPEPPS,ATP6V1A,HP1BP3,LMNA	7
BP	GO:0009152	purine ribonucleotide biosynthetic process	8/226	217/18614	0.00512571	0.0419092	0.0324047	COX2,ATP5F1A,ALDOA,VCP,HPRT1,ATP5F1B,ATP6V1A,ACOT7	8
BP	GO:0071805	potassium ion transmembrane transport	8/226	217/18614	0.00512571	0.0419092	0.0324047	YWHAE,ATP1A2,GNB2,ATP1A1,ATP1A3,VAMP2,ATP1B1,BIN1	8
BP	GO:0007052	mitotic spindle organization	6/226	130/18614	0.00513074	0.0419092	0.0324047	HSPA1A,GNAI1,VCP,STMN1,RHOA,CLTC	6
BP	GO:0098657	import into cell	9/226	265/18614	0.00521605	0.0425039	0.0328645	PPP3CA,FABP3,PPP3CB,SNAP25,ATP1A2,ATP1A1,ATP1A3,SLC3A2,ATP1B1	9
BP	GO:0006937	regulation of muscle contraction	7/226	173/18614	0.00527617	0.0426943	0.0330117	ATP1A2,ATP1A1,RHOA,ANXA6,ATP2B1,ATP1B1,BIN1	7
BP	GO:2000058	regulation of ubiquitin-dependent protein catabolic process	7/226	173/18614	0.00527617	0.0426943	0.0330117	SIRT2,HSPA1A,RPS7,VCP,CLU,MAP1A,HSP90AB1	7
BP	GO:0002028	regulation of sodium ion transport	5/226	92/18614	0.0052771	0.0426943	0.0330117	ACTN4,ATP1A2,ATP1A1,ATP1B1,NHERF1	5
BP	GO:0030048	actin filament-based movement	6/226	131/18614	0.00532385	0.0429702	0.033225	ACTN4,ATP1A2,GSN,ATP1A1,EPDR1,BIN1	6
BP	GO:2000649	regulation of sodium ion transmembrane transporter activity	4/226	58/18614	0.00537797	0.0432462	0.0334384	ACTN4,ATP1A2,ATP1B1,NHERF1	4
BP	GO:0010038	response to metal ion	11/226	367/18614	0.0053835	0.0432462	0.0334384	MAPK1,MAPT,PPP3CA,CUTA,GSS,GPHN,HSPA5,TF,SOD2,QDPR,SYT1	11
BP	GO:1902230	negative regulation of intrinsic apoptotic signaling pathway in response to DNA damage	3/226	30/18614	0.0056306	0.0450183	0.0348086	MIF,CLU,CD44	3
BP	GO:1902914	regulation of protein polyubiquitination	3/226	30/18614	0.0056306	0.0450183	0.0348086	UBE2V1,UBE2N,PPIA	3
BP	GO:0031102	neuron projection regeneration	4/226	59/18614	0.00571517	0.0454804	0.0351659	OMG,TNC,THY1,TNR	4
BP	GO:0051289	protein homotetramerization	4/226	59/18614	0.00571517	0.0454804	0.0351659	ALDOA,HPRT1,SOD2,ALDH9A1	4
BP	GO:1901379	regulation of potassium ion transmembrane transport	5/226	94/18614	0.00577695	0.0457578	0.0353804	YWHAE,GNB2,VAMP2,ATP1B1,BIN1	5
BP	GO:0021537	telencephalon development	9/226	270/18614	0.00587661	0.0463312	0.0358237	YWHAE,HPRT1,TUBB2A,ATP1A2,RHOA,PLXNA4,ATP1A3,BCAN,TNR	9
BP	GO:0052547	regulation of peptidase activity	12/226	425/18614	0.00593124	0.0465766	0.0360135	MAPT,RPS3,PRDX5,VTN,LRP1,VCP,PEBP1,GSN,RHOA,PRDX3,CD44,BIN1	12
BP	GO:0051091	positive regulation of DNA-binding transcription factor activity	9/226	271/18614	0.00601615	0.0467698	0.0361629	PPP3CA,HSPA1A,UBE2V1,UBE2N,RPS3,PPIA,CLU,CAMK2A,PRDX3	9
BP	GO:0051491	positive regulation of filopodium assembly	3/226	31/18614	0.00617873	0.0467698	0.0361629	DPYSL3,FSCN1,GPM6A	3
BP	GO:0070293	renal absorption	3/226	31/18614	0.00617873	0.0467698	0.0361629	HBB,GSN,NHERF1	3
BP	GO:0002291	T cell activation via T cell receptor contact with antigen bound to MHC molecule on antigen presenting cell	2/226	10/18614	0.00619376	0.0467698	0.0361629	LGALS3,CD81	2
BP	GO:0003056	regulation of vascular associated smooth muscle contraction	2/226	10/18614	0.00619376	0.0467698	0.0361629	RHOA,ATP2B1	2
BP	GO:0009113	purine nucleobase biosynthetic process	2/226	10/18614	0.00619376	0.0467698	0.0361629	PRPS1,HPRT1	2
BP	GO:0009128	purine nucleoside monophosphate catabolic process	2/226	10/18614	0.00619376	0.0467698	0.0361629	GDA,HPRT1	2
BP	GO:0019062	virion attachment to host cell	2/226	10/18614	0.00619376	0.0467698	0.0361629	HSP90AB1,CD81	2
BP	GO:0030388	fructose 1,6-bisphosphate metabolic process	2/226	10/18614	0.00619376	0.0467698	0.0361629	ALDOA,ALDOC	2
BP	GO:0036093	germ cell proliferation	2/226	10/18614	0.00619376	0.0467698	0.0361629	PTGDS,UCHL1	2
BP	GO:0071803	positive regulation of podosome assembly	2/226	10/18614	0.00619376	0.0467698	0.0361629	FSCN1,RHOA	2
BP	GO:0098885	modification of postsynaptic actin cytoskeleton	2/226	10/18614	0.00619376	0.0467698	0.0361629	CYFIP1,RHOA	2
BP	GO:1990034	calcium ion export across plasma membrane	2/226	10/18614	0.00619376	0.0467698	0.0361629	YWHAE,ATP2B1	2
BP	GO:1990504	dense core granule exocytosis	2/226	10/18614	0.00619376	0.0467698	0.0361629	SNAP25,RAB3A	2
BP	GO:0098659	inorganic cation import across plasma membrane	6/226	136/18614	0.00637017	0.047889	0.0370283	PPP3CA,PPP3CB,ATP1A2,ATP1A1,ATP1A3,ATP1B1	6
BP	GO:0097120	receptor localization to synapse	4/226	61/18614	0.00643126	0.0480295	0.0371369	NPTN,GPHN,SNAP25,VPS35	4
BP	GO:1905517	macrophage migration	4/226	61/18614	0.00643126	0.0480295	0.0371369	MAPK1,MIF,LGALS3,CD81	4
BP	GO:0007032	endosome organization	5/226	97/18614	0.00658796	0.0490919	0.0379583	ATP6V1H,RAB7A,RAB5B,ATP6V0A1,ATP6V1A	5
BP	GO:0035725	sodium ion transmembrane transport	7/226	181/18614	0.00671555	0.0498101	0.0385137	ACTN4,ATP1A2,ATP1A1,ATP1A3,SLC3A2,ATP1B1,NHERF1	7
BP	GO:0010720	positive regulation of cell development	12/226	432/18614	0.0067219	0.0498101	0.0385137	CYFIP1,SIRT2,NPTN,MAPT,L1CAM,PPP3CA,PTPRZ1,MAP6,RHOA,PLXNA4,CAMK2B,BIN1	12
BP	GO:0001516	prostaglandin biosynthetic process	3/226	32/18614	0.00675764	0.0498101	0.0385137	CBR1,MIF,PTGDS	3
BP	GO:0031116	positive regulation of microtubule polymerization	3/226	32/18614	0.00675764	0.0498101	0.0385137	MAPT,HSPA1A,RPS3	3
