# Supplementary material for: Probe-dependent Proximity Profiling (ProPPr) Uncovers Similarities and Differences in Phospho-Tau-Associated Proteomes Between Tauopathies
Source: Mol Neurodegener. 2025 Mar 13;20:32. doi: 10.1186/s13024-025-00817-0 (PMC11905455; doi:10.1186/s13024-025-00817-0)
Supplement: Supplementary file 5 — Supplementary Material 5. [file 13024_2025_817_MOESM5_ESM.xlsx]

## Sheet: Supplementary table 4
Table S4: Gene Ontology Cellular Component overrepresented terms in phospho-tau-associated proteome shared across tauopathies. ID - Gene Ontology term ID; GeneRatio - ratio between number of genes from the input mapped to a given GO term and number of genes from the input mapped to any GO term; BgRatio - ratio between number of genes in a given GO term and total number of genes in all GO terms; p…
ONTOLOGY	ID	Description	GeneRatio	BgRatio	pvalue	p.adjust	qvalue	geneID	Count
CC	GO:0005925	focal adhesion	33/228	422/19518	4.56e-18	1.58e-15	9.47e-16	CYFIP1,ACTN4,MAPK1,YWHAE,L1CAM,HSPA1A,RPS18,RPS7,HSPA8,RPS3,HSPA5,ANXA5,LRP1,HSPA9,PPIA,GNB2,PDIA3,RPS4X,GSN,P4HB,LAP3,TNC,RHOA,HSP90B1,ARPC3,ANXA6,FLNB,CD44,THY1,RAB10,CD81,NFASC,CLTC	33
CC	GO:0034774	secretory granule lumen	29/228	322/19518	1.28e-17	1.58e-15	9.47e-16	PADI2,CCT8,CYFIP1,ACTN4,MAPK1,MIF,TUBB4B,TUBB,CCT2,HSPA8,PYGB,ALDOA,VCP,FTL,EEF1A1,PRDX6,ALDOC,PPIA,CLU,GSN,PKM,SPTAN1,GSTP1,TF,OLA1,LGALS3BP,C3,HSP90AB1,VAT1	29
CC	GO:0042470	melanosome	19/228	112/19518	4.84e-17	2.81e-15	1.69e-15	YWHAE,HSPA8,HSPA5,RAB7A,PDIA3,ATP1A1,P4HB,TPP1,HSP90B1,ATP6V1B2,RAB5B,ANXA6,PRDX1,HSP90AB1,SLC3A2,CLTC,ATP6V0A1,RAB5C,RAB1A	19
CC	GO:0101002	ficolin-1-rich granule	22/228	185/19518	3.78e-16	1.92e-14	1.15e-14	GAA,CCT8,MAPK1,MIF,HSPA1A,ASAH1,HSPA8,HBB,LGALS3,ALDOA,VCP,EEF1A1,ALDOC,PPIA,GSN,PKM,LAMP2,GSTP1,RHOA,HSP90AB1,NFASC,ATP6V0A1	22
CC	GO:0005775	vacuolar lumen	21/228	176/19518	1.7e-15	7.69e-14	4.61e-14	PADI2,GAA,CCT8,MAPK1,VCAN,NCAN,TUBB4B,TUBB,ASAH1,CCT2,HSPA8,PYGB,VCP,FTL,PRDX6,LAMP2,TPP1,EPDR1,C3,BCAN,VAT1	21
CC	GO:0070382	exocytic vesicle	22/228	225/19518	2.37e-14	9.63e-13	5.78e-13	SEPTIN5,SYN1,AMPH,SYN2,DPYSL3,SEPTIN8,SNAP25,RAB3A,RAB7A,SEPTIN2,ATP6V0D1,VAMP1,SNAP91,ATP6V1B2,RAB5B,RAB10,SYT1,ATP2B1,ATP6V0A1,ATP6V1A,VAMP2,BIN1	22
CC	GO:0030133	transport vesicle	28/228	425/19518	1.36e-13	5.04e-12	3.02e-12	SEPTIN5,SYN1,AMPH,NCALD,SYN2,DPYSL3,SEPTIN8,SNAP25,RAB3A,RAB7A,SEPTIN2,RAB14,CPE,MAP6,ATP6V0D1,VAMP1,SNAP91,ATP6V1B2,RAB5B,RAB10,CLTC,SYT1,ATP2B1,ATP6V0A1,ATP6V1A,VAMP2,RAB1A,BIN1	28
CC	GO:0030658	transport vesicle membrane	21/228	234/19518	5.11e-13	1.73e-11	1.04e-11	SYN1,AMPH,NCALD,SYN2,SEPTIN8,RAB3A,RAB7A,CPE,MAP6,ATP6V0D1,VAMP1,ATP6V1B2,RAB5B,CLTC,SYT1,ATP2B1,ATP6V0A1,ATP6V1A,VAMP2,RAB1A,BIN1	21
CC	GO:0008021	synaptic vesicle	20/228	210/19518	6.16e-13	1.93e-11	1.16e-11	SEPTIN5,SYN1,AMPH,SYN2,SEPTIN8,SNAP25,RAB3A,RAB7A,SEPTIN2,ATP6V0D1,VAMP1,SNAP91,ATP6V1B2,RAB5B,SYT1,ATP2B1,ATP6V0A1,ATP6V1A,VAMP2,BIN1	20
CC	GO:1904813	ficolin-1-rich granule lumen	16/228	124/19518	1.26e-12	3.65e-11	2.19e-11	CCT8,MAPK1,MIF,HSPA1A,ASAH1,HSPA8,HBB,ALDOA,VCP,EEF1A1,ALDOC,PPIA,GSN,PKM,GSTP1,HSP90AB1	16
CC	GO:0030672	synaptic vesicle membrane	16/228	125/19518	1.43e-12	3.65e-11	2.19e-11	SYN1,AMPH,SYN2,SEPTIN8,RAB3A,RAB7A,ATP6V0D1,VAMP1,ATP6V1B2,RAB5B,SYT1,ATP2B1,ATP6V0A1,ATP6V1A,VAMP2,BIN1	16
CC	GO:0005766	primary lysosome	17/228	155/19518	3.61e-12	8.17e-11	4.9e-11	PADI2,GAA,CCT8,MAPK1,TUBB4B,TUBB,VAPA,CCT2,PYGB,RAP1B,VCP,FTL,PRDX6,LAMP2,C3,VAT1,RAB5C	17
CC	GO:0005765	lysosomal membrane	25/228	415/19518	2.12e-11	4.31e-10	2.59e-10	GAA,NSF,GNA11,ATP6V1H,VAPA,HSPA8,GNAI1,RAP1B,LRP1,EEF1A1,UBA1,RAB7A,GNB2,RAB14,LAMP2,ATP6V0D1,ATP6V1B2,ANXA6,VPS35,SLC3A2,CLTC,ATP6V0A1,ATP6V1A,RAB5C,GNB1	25
CC	GO:0035578	azurophil granule lumen	12/228	91/19518	6.77e-10	1.25e-08	7.51e-09	PADI2,CCT8,MAPK1,TUBB4B,TUBB,CCT2,PYGB,VCP,FTL,PRDX6,C3,VAT1	12
CC	GO:0070820	tertiary granule	15/228	164/19518	9.2e-10	1.63e-08	9.77e-09	GAA,CYFIP1,ASAH1,HBB,LGALS3,ALDOA,SNAP25,ALDOC,RAB14,SPTAN1,LAMP2,VAMP1,RHOA,NFASC,ATP6V0A1	15
CC	GO:0043025	neuronal cell body	25/228	500/19518	1.07e-09	1.73e-08	1.04e-08	CYFIP1,SIRT2,MAPT,L1CAM,TUBB4A,NEGR1,PURA,SNCG,CKB,ATP1A2,TUBB3,GPM6A,CADM2,UCHL1,MAP1A,SPTBN2,CRMP1,VPS35,HSP90AB1,ATP1A3,THY1,NCDN,SLC3A2,ATP2B1,DPYSL5	25
CC	GO:0030667	secretory granule membrane	20/228	319/19518	1.19e-09	1.87e-08	1.12e-08	GAA,VAPA,RAP1B,LGALS3,SNAP25,RAB3A,RAB7A,RAB14,LAMP2,CPE,VAMP1,RHOA,RAB5B,CD44,RAB10,NFASC,SYT1,ATP6V0A1,RAB5C,VAMP2	20
CC	GO:0098978	glutamatergic synapse	22/228	410/19518	3.13e-09	4.72e-08	2.83e-08	NPTN,SYN2,PPP3CA,HSPA8,RAP1B,VCP,PPP3CB,PURA,SNAP25,GPM6A,NRCAM,RHOA,SPTBN2,PLXNA4,VPS35,CTBP1,BCAN,ICAM5,SYT1,ATP2B1,BIN1,TNR	22
CC	GO:0150034	distal axon	18/228	277/19518	4.75e-09	6.9e-08	4.14e-08	CYFIP1,SIRT2,MAPT,L1CAM,DPYSL3,HSPA8,SNAP25,SNCG,RAB3A,FSCN1,TUBB3,GPM6A,ATP6V0D1,CRMP1,HSP90AB1,ATP1A3,THY1,BIN1	18
CC	GO:0101031	chaperone complex	8/228	42/19518	2.57e-08	3.61e-07	2.17e-07	CCT8,CCT6A,CCT2,HSPA8,TCP1,CCT3,HSP90AB1,CCT7	8
CC	GO:0030139	endocytic vesicle	19/228	347/19518	2.83e-08	3.84e-07	2.3e-07	HBB,LRP1,RAB7A,PDIA3,GSN,RAB14,LAMP2,ATP6V0D1,TF,HSP90B1,CAMK2A,RAB5B,FLNB,RAB10,CAMK2B,CLTC,SYT1,ATP6V0A1,VAMP2	19
CC	GO:0030665	clathrin-coated vesicle membrane	12/228	136/19518	6.86e-08	9e-07	5.4e-07	NCALD,ATP6V1H,HSPA8,RAB3A,ATP6V0D1,TF,ATP6V1B2,CLTC,SYT1,ATP6V0A1,ATP6V1A,VAMP2	12
CC	GO:0005874	microtubule	21/228	461/19518	1.21e-07	1.53e-06	9.2e-07	CCT8,SIRT2,MAPT,CCT6A,TUBB4B,TUBB,CCT2,TCP1,TUBB4A,TPPP,TPPP3,TUBB2A,TUBB3,CCT3,MAP6,MAP1A,STMN1,TBCA,TUBA4A,CCT7,CLTC	21
CC	GO:0030136	clathrin-coated vesicle	14/228	215/19518	2.5e-07	3.08e-06	1.85e-06	NCALD,ATP6V1H,HSPA8,RAB3A,RAB14,ATP6V0D1,SNAP91,TF,ATP6V1B2,CLTC,SYT1,ATP6V0A1,ATP6V1A,VAMP2	14
CC	GO:0005834	heterotrimeric G-protein complex	6/228	26/19518	4.51e-07	5.39e-06	3.24e-06	GNA11,GNAI1,GNAS,GNB2,GNAO1,GNB1	6
CC	GO:0031252	cell leading edge	19/228	422/19518	5.89e-07	6.85e-06	4.11e-06	CYFIP1,RNH1,MAPT,AMPH,DPYSL3,CADM4,RPS3,EEF1A1,FSCN1,TUBB3,GSN,P4HB,RHOA,ATP6V1B2,ARPC3,CD44,THY1,ATP2B1,NHERF1	19
CC	GO:0030426	growth cone	12/228	167/19518	6.45e-07	7.29e-06	4.37e-06	CYFIP1,SIRT2,MAPT,L1CAM,DPYSL3,SNAP25,FSCN1,TUBB3,GPM6A,CRMP1,HSP90AB1,THY1	12
CC	GO:0044304	main axon	8/228	64/19518	7.73e-07	8.51e-06	5.1e-06	SIRT2,MAPT,TUBB4A,MAP1A,NRCAM,THY1,NFASC,BIN1	8
CC	GO:0072562	blood microparticle	11/228	144/19518	1.04e-06	1.09e-05	6.52e-06	HSPA1A,HSPA8,HBB,VTN,ANXA5,HSPA2,CLU,GSN,TF,LGALS3BP,C3	11
CC	GO:0019897	extrinsic component of plasma membrane	11/228	147/19518	1.28e-06	1.3e-05	7.79e-06	GNA11,PPP3CA,GNAI1,SNAP25,GNAS,GNB2,SNAP91,TF,RHOA,GNAO1,GNB1	11
CC	GO:0019898	extrinsic component of membrane	15/228	288/19518	1.6e-06	1.58e-05	9.51e-06	SYN1,GNA11,PPP3CA,GNAI1,SNAP25,GNAS,GNB2,SNAP91,TF,RHOA,ATP6V1B2,GNAO1,ATP6V1A,BIN1,GNB1	15
CC	GO:0016469	proton-transporting two-sector ATPase complex	7/228	50/19518	1.76e-06	1.67e-05	1e-05	ATP6V1H,ATP5F1A,ATP5F1B,ATP6V0D1,ATP6V1B2,ATP6V0A1,ATP6V1A	7
CC	GO:0033178	proton-transporting two-sector ATPase complex, catalytic domain	5/228	19/19518	2.12e-06	1.96e-05	1.18e-05	ATP6V1H,ATP5F1A,ATP5F1B,ATP6V1B2,ATP6V1A	5
CC	GO:0043202	lysosomal lumen	9/228	98/19518	2.21e-06	2e-05	1.2e-05	GAA,VCAN,NCAN,ASAH1,HSPA8,LAMP2,TPP1,EPDR1,BCAN	9
CC	GO:0044306	neuron projection terminus	10/228	129/19518	2.84e-06	2.51e-05	1.51e-05	CYFIP1,HSPA8,SNCG,RAB3A,ATP6V0D1,UCHL1,ATP1A3,SYT1,VAMP2,BIN1	10
CC	GO:0030666	endocytic vesicle membrane	12/228	196/19518	3.48e-06	3.01e-05	1.81e-05	LRP1,RAB7A,LAMP2,ATP6V0D1,TF,CAMK2A,RAB10,CAMK2B,CLTC,SYT1,ATP6V0A1,VAMP2	12
CC	GO:0031234	extrinsic component of cytoplasmic side of plasma membrane	8/228	80/19518	4.31e-06	3.66e-05	2.19e-05	GNA11,GNAI1,SNAP25,GNAS,GNB2,RHOA,GNAO1,GNB1	8
CC	GO:0098850	extrinsic component of synaptic vesicle membrane	4/228	11/19518	5.61e-06	4.57e-05	2.74e-05	SYN1,ATP6V1B2,ATP6V1A,BIN1	4
CC	GO:0098857	membrane microdomain	15/228	324/19518	6.73e-06	5.37e-05	3.22e-05	MAPK1,MAPT,TUBB,ATP5F1A,ATP1A2,ATP1A1,HK1,LAMP2,TPP1,THY1,EFHD2,ATP2B1,ATP1B1,TNR,NHERF1	15
CC	GO:0062023	collagen-containing extracellular matrix	17/228	415/19518	8.26e-06	6.29e-05	3.77e-05	HAPLN1,VCAN,L1CAM,VTN,PTPRZ1,LGALS1,LGALS3,ANXA5,CLU,PKM,TNC,HSP90B1,ANXA6,LGALS3BP,BCAN,NCAM1,TNR	17
CC	GO:0060198	clathrin-sculpted vesicle	4/228	12/19518	8.34e-06	6.29e-05	3.77e-05	HSPA8,RAB3A,SYT1,VAMP2	4
CC	GO:0005938	cell cortex	14/228	302/19518	1.35e-05	9.73e-05	5.84e-05	ACTN4,SEPTIN5,GNAI1,SEPTIN8,EEF1A1,FSCN1,SEPTIN2,GSN,SPTAN1,WDR1,RHOA,SPTBN2,FLNB,CTBP1	14
CC	GO:0098562	cytoplasmic side of membrane	11/228	193/19518	1.75e-05	0.000122913	7.38e-05	GNA11,PPP3CA,GNAI1,EEF1A1,SNAP25,GNAS,GNB2,RHOA,GNAO1,ATP2B1,GNB1	11
CC	GO:0009898	cytoplasmic side of plasma membrane	10/228	159/19518	1.82e-05	0.000125339	7.52e-05	GNA11,PPP3CA,GNAI1,SNAP25,GNAS,GNB2,RHOA,GNAO1,ATP2B1,GNB1	10
CC	GO:0015629	actin cytoskeleton	18/228	489/19518	1.9e-05	0.000128697	7.72e-05	ACTN4,AMPH,DPYSL3,ALDOA,EEF1A1,TMOD2,FSCN1,SEPTIN2,HNRNPC,GSN,SPTAN1,WDR1,ARPC3,SPTBN2,FLNB,CAPZA1,BIN1,NHERF1	18
CC	GO:0045121	membrane raft	14/228	323/19518	2.85e-05	0.000186837	0.000112107	MAPK1,MAPT,TUBB,ATP5F1A,ATP1A2,ATP1A1,HK1,TPP1,THY1,EFHD2,ATP2B1,ATP1B1,TNR,NHERF1	14
CC	GO:0045335	phagocytic vesicle	9/228	141/19518	4.26e-05	0.000271941	0.000163171	RAB7A,PDIA3,GSN,RAB14,LAMP2,ATP6V0D1,FLNB,RAB10,ATP6V0A1	9
CC	GO:1904724	tertiary granule lumen	6/228	55/19518	4.28e-05	0.000271941	0.000163171	CYFIP1,ASAH1,HBB,ALDOA,ALDOC,SPTAN1	6
CC	GO:0098984	neuron to neuron synapse	15/228	382/19518	4.61e-05	0.000288523	0.000173122	NPTN,NSF,SYN1,SYN2,RPS18,GPHN,RPS3,ATP1A1,NRCAM,CAMK2A,PLXNA4,VPS35,ATP1A3,PCBP1,SYT1	15
CC	GO:0072686	mitotic spindle	10/228	180/19518	5.26e-05	0.000319263	0.000191566	SIRT2,MAPK1,TUBB4B,TUBB,RPS3,TUBB4A,TPPP,TUBB2A,TUBB3,CLTC	10
CC	GO:0101003	ficolin-1-rich granule membrane	6/228	61/19518	7.73e-05	0.00046247	0.000277494	GAA,LGALS3,LAMP2,RHOA,NFASC,ATP6V0A1	6
CC	GO:0043194	axon initial segment	4/228	21/19518	9.29e-05	0.000547686	0.000328626	MAP1A,NRCAM,NFASC,BIN1	4
CC	GO:0022627	cytosolic small ribosomal subunit	5/228	41/19518	0.000110732	0.000643827	0.000386313	RPS18,RPS7,RPS3,RPS4X,RPSA	5
CC	GO:0098685	Schaffer collateral - CA1 synapse	7/228	94/19518	0.000117044	0.000670944	0.000402583	NPTN,SYN1,SYN2,PPP3CA,INA,ARHGDIA,TNR	7
CC	GO:0030027	lamellipodium	10/228	202/19518	0.000137096	0.000774971	0.000465002	CYFIP1,RNH1,DPYSL3,FSCN1,TUBB3,GSN,P4HB,RHOA,ARPC3,CD44	10
CC	GO:0001772	immunological synapse	5/228	43/19518	0.000139562	0.000778105	0.000466883	NPTN,LGALS3,ARHGDIA,CD81,ATP2B1	5
CC	GO:0044295	axonal growth cone	4/228	24/19518	0.000160379	0.000870324	0.000522217	CYFIP1,L1CAM,GPM6A,HSP90AB1	4
CC	GO:0099571	postsynaptic cytoskeleton	3/228	10/19518	0.000177686	0.000951553	0.000570956	NEFM,INA,SPTBN2	3
CC	GO:0030864	cortical actin cytoskeleton	6/228	73/19518	0.000210867	0.00111458	0.000668778	ACTN4,EEF1A1,GSN,SPTAN1,WDR1,SPTBN2	6
CC	GO:0043197	dendritic spine	9/228	175/19518	0.000222651	0.00116178	0.000697099	CYFIP1,MAPT,PPP3CA,ATP1A2,GPM6A,RHOA,CAMK2A,ATP1A3,ATP2B1	9
CC	GO:0000221	vacuolar proton-transporting V-type ATPase, V1 domain	3/228	11/19518	0.000242213	0.00121705	0.000730259	ATP6V1H,ATP6V1B2,ATP6V1A	3
CC	GO:0034663	endoplasmic reticulum chaperone complex	3/228	11/19518	0.000242213	0.00121705	0.000730259	HSPA5,P4HB,HSP90B1	3
CC	GO:0043209	myelin sheath	5/228	49/19518	0.000261191	0.00128078	0.0007685	SIRT2,CA2,PLP1,TUBB4A,ATP1A3	5
CC	GO:0032279	asymmetric synapse	13/228	353/19518	0.000276838	0.00134135	0.000804842	NPTN,NSF,SYN1,SYN2,RPS18,GPHN,RPS3,ATP1A1,NRCAM,CAMK2A,PLXNA4,VPS35,PCBP1	13
CC	GO:0044754	autolysosome	3/228	12/19518	0.00032017	0.00151848	0.000911127	GAA,FTL,LAMP2	3
CC	GO:0005788	endoplasmic reticulum lumen	12/228	312/19518	0.000320858	0.00151848	0.000911127	MAPK1,VCAN,VTN,LGALS1,HSPA5,PDIA3,CLU,P4HB,TNC,TF,HSP90B1,C3	12
CC	GO:1904949	ATPase complex	8/228	147/19518	0.000339846	0.00158237	0.000949461	ATP6V1H,ATP5F1A,VCP,ATP5F1B,ATP6V0D1,ATP6V1B2,ATP6V0A1,ATP6V1A	8
CC	GO:0032809	neuronal cell body membrane	4/228	29/19518	0.000342439	0.00158237	0.000949461	CADM2,ATP1A3,THY1,ATP2B1	4
CC	GO:0030315	T-tubule	5/228	52/19518	0.000346021	0.00158237	0.000949461	PPP3CB,ATP1A2,ATP1A1,ATP1B1,BIN1	5
CC	GO:0099572	postsynaptic specialization	13/228	364/19518	0.000371234	0.0016788	0.00100732	NPTN,NSF,SYN1,SYN2,RPS18,GPHN,HSPA8,RPS3,ATP1A1,NRCAM,CAMK2A,VPS35,PCBP1	13
CC	GO:0043679	axon terminus	7/228	114/19518	0.000386482	0.00172855	0.00103717	CYFIP1,HSPA8,SNCG,RAB3A,ATP6V0D1,ATP1A3,BIN1	7
CC	GO:0048786	presynaptic active zone	6/228	82/19518	0.000397571	0.00175882	0.00105534	NPTN,SYN1,RAB3A,GPM6A,CTBP1,ATP2B1	6
CC	GO:0097470	ribbon synapse	3/228	13/19518	0.00041264	0.00180585	0.00108356	HSPA8,SNAP25,ATP2B1	3
CC	GO:0005819	spindle	14/228	421/19518	0.000455317	0.00197142	0.0011829	SIRT2,MAPK1,TUBB4B,TUBB,RPS3,TUBB4A,TPPP,SNCG,HSPA2,TUBB2A,SEPTIN2,TUBB3,CRMP1,CLTC	14
CC	GO:0005940	septin ring	3/228	14/19518	0.000520661	0.00218463	0.00131083	SEPTIN5,SEPTIN8,SEPTIN2	3
CC	GO:0098636	protein complex involved in cell adhesion	5/228	57/19518	0.000531727	0.0022083	0.00132504	PLP1,VTN,LGALS1,TNC,TNR	5
CC	GO:0016324	apical plasma membrane	13/228	381/19518	0.000570474	0.00234528	0.00140723	GNAS,ATP1A1,ATP6V0D1,TF,ATP6V1B2,SPTBN2,CD44,THY1,SLC3A2,ATP2B1,ATP6V1A,ATP1B1,NHERF1	13
CC	GO:0035577	azurophil granule membrane	5/228	58/19518	0.00057642	0.00234603	0.00140768	GAA,VAPA,RAP1B,LAMP2,RAB5C	5
CC	GO:0045171	intercellular bridge	6/228	89/19518	0.000616637	0.00248486	0.00149098	TUBB4B,TUBB,TUBB4A,TUBB2A,SEPTIN2,TUBB3	6
CC	GO:0014069	postsynaptic density	12/228	339/19518	0.000671502	0.00267942	0.00160772	NPTN,NSF,SYN1,SYN2,RPS18,GPHN,RPS3,ATP1A1,NRCAM,CAMK2A,VPS35,PCBP1	12
CC	GO:0042734	presynaptic membrane	8/228	164/19518	0.000703185	0.0027786	0.00166723	NPTN,SNAP25,GPM6A,SNAP91,ATP1A3,SYT1,ATP2B1,CADM3	8
CC	GO:0045177	apical part of cell	14/228	446/19518	0.000800476	0.0031028	0.00186176	CA2,GNAS,ATP1A1,ATP6V0D1,TF,ATP6V1B2,SPTBN2,CD44,THY1,SLC3A2,ATP2B1,ATP6V1A,ATP1B1,NHERF1	14
CC	GO:0005902	microvillus	6/228	94/19518	0.0008233	0.00316116	0.00189678	FSCN1,ATP6V1B2,CD44,NFASC,ATP6V1A,NHERF1	6
CC	GO:0060076	excitatory synapse	5/228	64/19518	0.000906345	0.0034475	0.00206859	CYFIP1,GPM6A,SPTBN2,PLXNA4,SYT1	5
CC	GO:0098637	protein complex involved in cell-matrix adhesion	3/228	17/19518	0.000947812	0.00357185	0.0021432	VTN,TNC,TNR	3
CC	GO:0031256	leading edge membrane	8/228	180/19518	0.00128367	0.00474959	0.00284988	MAPT,AMPH,RPS3,EEF1A1,RHOA,CD44,THY1,ATP2B1	8
CC	GO:0098858	actin-based cell projection	9/228	225/19518	0.00135853	0.00498129	0.0029889	CYFIP1,FSCN1,TUBB3,GPM6A,ATP6V1B2,CD44,NFASC,ATP6V1A,NHERF1	9
CC	GO:0005759	mitochondrial matrix	14/228	484/19518	0.00173362	0.00622211	0.00373342	DLST,ALDH5A1,ATP5F1A,ALDH7A1,RPS3,PRDX5,HAGH,HSPA9,GOT2,ETFA,ATP5F1B,MDH2,SOD2,PRDX3	14
CC	GO:0030670	phagocytic vesicle membrane	5/228	78/19518	0.00219973	0.00778514	0.00467128	RAB7A,LAMP2,ATP6V0D1,RAB10,ATP6V0A1	5
CC	GO:0031201	SNARE complex	4/228	48/19518	0.00235942	0.0082783	0.0049672	SYN2,SNAP25,VAMP1,VAMP2	4
CC	GO:0030496	midbody	8/228	203/19518	0.00272527	0.0094448	0.00566712	SIRT2,GNAI1,HSPA5,SEPTIN2,LAP3,RHOA,HSP90B1,CRMP1	8
CC	GO:0005791	rough endoplasmic reticulum	5/228	82/19518	0.00273829	0.0094448	0.00566712	PTGDS,VTN,UBA1,PKM,RAB14	5
CC	GO:0002102	podosome	3/228	30/19518	0.00506117	0.0171658	0.0102999	FSCN1,GSN,WDR1	3
CC	GO:0042383	sarcolemma	6/228	136/19518	0.00530891	0.0178572	0.0107148	PPP3CA,PPP3CB,ATP1A2,ATP1A1,ATP1B1,BIN1	6
CC	GO:0001726	ruffle	7/228	181/19518	0.0054813	0.018286	0.0109721	CYFIP1,RPS3,EEF1A1,FSCN1,RHOA,ATP6V1B2,NHERF1	7
CC	GO:0000220	vacuolar proton-transporting V-type ATPase, V0 domain	2/228	10/19518	0.00574761	0.0190185	0.0114116	ATP6V0D1,ATP6V0A1	2
CC	GO:0031674	I band	6/228	141/19518	0.00631084	0.0206226	0.0123741	ACTN4,PPP3CA,ALDOA,PPP3CB,FLNB,BIN1	6
CC	GO:0097060	synaptic membrane	11/228	390/19518	0.00634355	0.0206226	0.0123741	NPTN,GPHN,HSPA8,SNAP25,GPM6A,SNAP91,NRCAM,ATP1A3,SYT1,ATP2B1,CADM3	11
CC	GO:0048787	presynaptic active zone membrane	3/228	34/19518	0.00720892	0.0231026	0.0138622	NPTN,GPM6A,ATP2B1	3
CC	GO:0031093	platelet alpha granule lumen	4/228	67/19518	0.00782648	0.0248858	0.0149321	ACTN4,ALDOA,CLU,OLA1	4
CC	GO:0031253	cell projection membrane	10/228	349/19518	0.00817177	0.0257823	0.01547	MAPT,RPS3,EEF1A1,FSCN1,SEPTIN2,RHOA,CD44,THY1,ATP2B1,NHERF1	10
CC	GO:0030175	filopodium	5/228	108/19518	0.00877333	0.0272576	0.0163553	CYFIP1,FSCN1,TUBB3,GPM6A,NHERF1	5
CC	GO:0042583	chromaffin granule	2/228	13/19518	0.00973548	0.029792	0.017876	CLU,SYT1	2
CC	GO:0044292	dendrite terminus	2/228	13/19518	0.00973548	0.029792	0.017876	CYFIP1,HSP90AB1	2
CC	GO:0097386	glial cell projection	3/228	38/19518	0.0098221	0.0298328	0.0179004	SIRT2,MAPT,NFASC	3
CC	GO:0005905	clathrin-coated pit	4/228	73/19518	0.0105297	0.0308922	0.0185361	LRP1,SNAP91,TF,CLTC	4
CC	GO:0030669	clathrin-coated endocytic vesicle membrane	4/228	73/19518	0.0105297	0.0308922	0.0185361	TF,CLTC,SYT1,VAMP2	4
CC	GO:0032153	cell division site	4/228	73/19518	0.0105297	0.0308922	0.0185361	SEPTIN5,SEPTIN8,SEPTIN2,RHOA	4
CC	GO:0070821	tertiary granule membrane	4/228	73/19518	0.0105297	0.0308922	0.0185361	GAA,SNAP25,RAB14,VAMP1	4
CC	GO:0030140	trans-Golgi network transport vesicle	3/228	39/19518	0.0105504	0.0308922	0.0185361	NCALD,RAB14,CLTC	3
CC	GO:0016234	inclusion body	4/228	74/19518	0.0110318	0.0320709	0.0192434	NEFM,MAPT,HSPA1A,CLU	4
CC	GO:0030673	axolemma	2/228	14/19518	0.0112713	0.0325348	0.0195217	MAPT,THY1	2
CC	GO:0005776	autophagosome	5/228	117/19518	0.0121286	0.0347631	0.0208587	GAA,HSPA8,FTL,RAB7A,LAMP2	5
CC	GO:0030017	sarcomere	7/228	213/19518	0.0127928	0.0364102	0.0218471	ACTN4,PPP3CA,ALDOA,PPP3CB,TMOD2,FLNB,BIN1	7
CC	GO:0072687	meiotic spindle	2/228	15/19518	0.0129061	0.0364775	0.0218875	SIRT2,HSPA2	2
CC	GO:0009925	basal plasma membrane	8/228	266/19518	0.0131923	0.0370295	0.0222186	LRP1,ATP1A1,TF,CD44,CD81,SLC3A2,ATP2B1,ATP1B1	8
CC	GO:0033268	node of Ranvier	2/228	16/19518	0.0146373	0.040804	0.0244835	NFASC,BIN1	2
CC	GO:0009295	nucleoid	3/228	45/19518	0.0155674	0.0428103	0.0256873	HSPA9,ATP5F1B,SOD2	3
CC	GO:0140534	endoplasmic reticulum protein-containing complex	5/228	126/19518	0.0162635	0.0444246	0.0266559	HSPA5,VCP,PDIA3,P4HB,HSP90B1	5
CC	GO:0043195	terminal bouton	3/228	47/19518	0.01749	0.0474561	0.0284749	CYFIP1,HSPA8,RAB3A	3
CC	GO:0030018	Z disc	5/228	129/19518	0.0178269	0.0480499	0.0288312	ACTN4,PPP3CA,PPP3CB,FLNB,BIN1	5
CC	GO:0030130	clathrin coat of trans-Golgi network vesicle	2/228	18/19518	0.0183794	0.048796	0.0292789	NCALD,CLTC	2
CC	GO:0031143	pseudopodium	2/228	18/19518	0.0183794	0.048796	0.0292789	ACTN4,MAPK1	2
CC	GO:0099568	cytoplasmic region	8/228	283/19518	0.0184633	0.048796	0.0292789	MAPT,GNAI1,TUBB4A,PURA,SEPTIN2,UCHL1,MAP1A,CTBP1	8
