# Supplementary material for: Probe-dependent Proximity Profiling (ProPPr) Uncovers Similarities and Differences in Phospho-Tau-Associated Proteomes Between Tauopathies
Source: Mol Neurodegener. 2025 Mar 13;20:32. doi: 10.1186/s13024-025-00817-0 (PMC11905455; doi:10.1186/s13024-025-00817-0)
Supplement: Supplementary file 6 — Supplementary Material 6. [file 13024_2025_817_MOESM6_ESM.xlsx]

## Sheet: Supplementary table 5
Table S5: Gene Ontology Molecular Function overrepresented terms in phospho-tau-associated proteome shared across tauopathies. ID - Gene Ontology term ID; GeneRatio - ratio between number of genes from the input mapped to a given GO term and number of genes from the input mapped to any GO term; BgRatio - ratio between number of genes in a given GO term and total number of genes in all GO terms; p…
ONTOLOGY	ID	Description	GeneRatio	BgRatio	pvalue	p.adjust	qvalue	geneID	Count
MF	GO:0140662	ATP-dependent protein folding chaperone	13/225	41/18369	1.28e-15	6.19e-13	4.5e-13	CCT8,CCT6A,HSPA1A,CCT2,HSPA8,TCP1,HSPA5,HSPA2,HSPA9,CCT3,HSP90B1,HSP90AB1,CCT7	13
MF	GO:0003924	GTPase activity	27/225	327/18369	4.86e-15	1.17e-12	8.51e-13	SEPTIN5,GNA11,TUBB4B,TUBB,GNAI1,SEPTIN8,RAP1B,TUBB4A,TPPP,EEF1A1,RAB3A,GNAS,TUBB2A,RAB7A,ARF3,GNB2,SEPTIN2,TUBB3,RAB14,RAB6B,RHOA,RAB5B,GNAO1,RAB10,RAB5C,RAB1A,GNB1	27
MF	GO:0005525	GTP binding	27/225	382/18369	2.12e-13	3.41e-11	2.48e-11	SEPTIN5,GNA11,TUBB4B,TUBB,GNAI1,SEPTIN8,RAP1B,TUBB4A,EEF1A1,RAB3A,GNAS,TUBB2A,RAB7A,ARF3,SEPTIN2,TUBB3,RAB14,RAB6B,RHOA,OLA1,RAB5B,ANXA6,GNAO1,TUBA4A,RAB10,RAB5C,RAB1A	27
MF	GO:0051082	unfolded protein binding	16/225	122/18369	1.97e-12	1.35e-10	9.84e-11	CCT8,CCT6A,HSPA1A,TUBB4B,CCT2,HSPA8,TCP1,HSPA5,HSPA2,HSPA9,PPIA,CLU,CCT3,HSP90B1,HSP90AB1,CCT7	16
MF	GO:0045296	cadherin binding	23/225	333/18369	2.28e-11	1.37e-09	9.98e-10	CCT8,YWHAE,HSPA1A,VAPA,HSPA8,ALDOA,HSPA5,FSCN1,PRDX6,SEPTIN2,PKM,SPTAN1,OLA1,SPTBN2,FLNB,PRDX1,HSP90AB1,PCBP1,RAB10,SLC3A2,EFHD2,CAPZA1,RAB1A	23
MF	GO:0019829	ATPase-coupled monoatomic cation transmembrane transporter activity	11/225	53/18369	3.54e-11	1.89e-09	1.38e-09	ATP6V1H,ATP1A2,ATP1A1,ATP5F1B,ATP6V0D1,ATP6V1B2,ATP1A3,ATP2B1,ATP6V0A1,ATP6V1A,ATP1B1	11
MF	GO:0016887	ATP hydrolysis activity	23/225	376/18369	2.57e-10	1.24e-08	9.01e-09	CCT8,NSF,CCT6A,ATP6V1H,HSPA1A,CCT2,HSPA8,ATP5F1A,TCP1,HSPA5,VCP,HSPA2,HSPA9,ATP1A2,ATP1A1,CCT3,HSP90B1,OLA1,HSP90AB1,ATP1A3,CCT7,ATP2B1,EIF4A1	23
MF	GO:0005200	structural constituent of cytoskeleton	13/225	111/18369	1.03e-09	4.51e-08	3.28e-08	NEFM,TUBB4B,TUBB,INA,TUBB4A,TUBB2A,TUBB3,SPTAN1,ARPC3,SPTBN2,TUBA4A,POTEI,LMNA	13
MF	GO:0003925	G protein activity	8/225	42/18369	3.69e-08	1.37e-06	9.95e-07	GNA11,RAP1B,RAB7A,RHOA,RAB5B,RAB10,RAB5C,RAB1A	8
MF	GO:0042625	ATPase-coupled ion transmembrane transporter activity	6/225	24/18369	3.54e-07	1.07e-05	7.75e-06	ATP6V1H,ATP5F1B,ATP6V0D1,ATP6V1B2,ATP6V0A1,ATP6V1A	6
MF	GO:0003779	actin binding	20/225	434/18369	4.23e-07	1.2e-05	8.72e-06	CYFIP1,ACTN4,MAPT,SYN1,NCALD,ALDOA,TMOD2,FSCN1,GSN,SPTAN1,P4HB,WDR1,MAP1A,ARPC3,SPTBN2,ANXA6,FLNB,CAMK2B,CAPZA1,BIN1	20
MF	GO:0051087	chaperone binding	10/225	104/18369	5.95e-07	1.59e-05	1.16e-05	MAPT,HSPA8,HSPA5,HSPA2,ATP1A2,CLU,ATP1A1,TBCA,ATP1A3,BIN1	10
MF	GO:0023026	MHC class II protein complex binding	6/225	27/18369	7.54e-07	1.82e-05	1.32e-05	YWHAE,HSPA8,PKM,HSP90AB1,CD81,ATP1B1	6
MF	GO:0031625	ubiquitin protein ligase binding	16/225	301/18369	1e-06	2.3e-05	1.67e-05	YWHAE,HSPA1A,TUBB,CCT2,HSPA8,UBE2N,TCP1,HSPA5,VCP,CKB,HSPA9,PRDX6,TPI1,CLU,UCHL1,HSP90AB1	16
MF	GO:0051787	misfolded protein binding	6/225	29/18369	1.19e-06	2.6e-05	1.89e-05	HSPA1A,HSPA8,HSPA5,HSPA2,HSPA9,CLU	6
MF	GO:0015399	primary active transmembrane transporter activity	12/225	170/18369	1.27e-06	2.66e-05	1.94e-05	COX2,ATP6V1H,ATP1A2,ATP1A1,ATP5F1B,ATP6V0D1,ATP6V1B2,ATP1A3,ATP2B1,ATP6V0A1,ATP6V1A,ATP1B1	12
MF	GO:0042288	MHC class I protein binding	5/225	19/18369	2.67e-06	5.14e-05	3.74e-05	TUBB4B,TUBB,ATP5F1A,VCP,ATP5F1B	5
MF	GO:0019003	GDP binding	8/225	73/18369	3.03e-06	5.62e-05	4.09e-05	GNAI1,RAP1B,RAB7A,RAB14,RHOA,RAB5B,RAB10,RAB5C	8
MF	GO:0015662	P-type ion transporter activity	5/225	20/18369	3.52e-06	6.28e-05	4.57e-05	ATP1A2,ATP1A1,ATP1A3,ATP2B1,ATP1B1	5
MF	GO:0022853	active monoatomic ion transmembrane transporter activity	13/225	233/18369	6.28e-06	0.000104401	7.59e-05	COX2,ATP6V1H,ATP1A2,ATP1A1,ATP5F1B,ATP6V0D1,ATP6V1B2,ATP1A3,SLC3A2,ATP2B1,ATP6V0A1,ATP6V1A,ATP1B1	13
MF	GO:0051015	actin filament binding	12/225	202/18369	7.61e-06	0.000122298	8.89e-05	CYFIP1,ACTN4,FSCN1,GSN,SPTAN1,WDR1,ARPC3,SPTBN2,ANXA6,FLNB,CAPZA1,BIN1	12
MF	GO:0005540	hyaluronic acid binding	5/225	24/18369	9.27e-06	0.000139639	0.00010155	HAPLN1,VCAN,NCAN,CD44,BCAN	5
MF	GO:0042287	MHC protein binding	6/225	42/18369	1.15e-05	0.000167468	0.000121788	TUBB4B,TUBB,ATP5F1A,VCP,ATP5F1B,CD81	6
MF	GO:0017022	myosin binding	7/225	70/18369	2.35e-05	0.000332622	0.000241894	RAB3A,GSN,RAB14,RAB6B,RHOA,RAB10,NHERF1	7
MF	GO:0070325	lipoprotein particle receptor binding	5/225	29/18369	2.46e-05	0.000339343	0.000246781	LRP1,CLU,HSP90B1,CLTC,SYT1	5
MF	GO:0016812	hydrolase activity, acting on carbon-nitrogen (but not peptide) bonds, in cyclic amides	4/225	15/18369	2.69e-05	0.000360277	0.000262005	DPYSL3,DPYSL4,CRMP1,DPYSL5	4
MF	GO:0016810	hydrolase activity, acting on carbon-nitrogen (but not peptide) bonds	9/225	131/18369	3.43e-05	0.000439166	0.000319376	PADI2,SIRT2,GDA,DDAH2,DPYSL3,ASAH1,DPYSL4,CRMP1,DPYSL5	9
MF	GO:0031489	myosin V binding	4/225	16/18369	3.55e-05	0.000439166	0.000319376	RAB3A,RAB14,RAB6B,RAB10	4
MF	GO:0050780	dopamine receptor binding	4/225	16/18369	3.55e-05	0.000439166	0.000319376	GNAS,VPS35,ATP1A3,NHERF1	4
MF	GO:0030674	protein-macromolecule adaptor activity	15/225	361/18369	4.11e-05	0.000495349	0.000360234	MAPT,SH3BGRL,SYN1,HSPA8,LGALS3,SNAP25,RAB3A,FSCN1,GNB2,VAMP1,MAP1A,VAMP2,ATP1B1,GNB1,NHERF1	15
MF	GO:0031420	alkali metal ion binding	4/225	17/18369	4.6e-05	0.000541043	0.000393465	ATP1A2,IMPA1,PKM,ATP1A1	4
MF	GO:0004601	peroxidase activity	6/225	55/18369	5.55e-05	0.000636872	0.000463154	PRDX5,HBB,PRDX6,GSTP1,PRDX3,PRDX1	6
MF	GO:0017075	syntaxin-1 binding	4/225	20/18369	9.1e-05	0.000974948	0.000709015	NSF,SNAP25,SYT1,VAMP2	4
MF	GO:0031683	G-protein beta/gamma-subunit complex binding	4/225	22/18369	0.000134808	0.00141256	0.00102726	GNA11,GNAI1,GNAS,GNAO1	4
MF	GO:0048156	tau protein binding	5/225	43/18369	0.000173747	0.00178183	0.00129581	HSPA2,CLU,MAP1A,HSP90AB1,BIN1	5
MF	GO:0031072	heat shock protein binding	8/225	128/18369	0.000181447	0.00182203	0.00132504	MAPT,HSPA1A,HSPA8,RPS3,HSPA5,HSPA2,HSPA9,HSP90AB1	8
MF	GO:0050750	low-density lipoprotein particle receptor binding	4/225	24/18369	0.0001921	0.00188963	0.00137421	CLU,HSP90B1,CLTC,SYT1	4
MF	GO:0030276	clathrin binding	6/225	70/18369	0.000215483	0.00207725	0.00151065	NCALD,LRP1,SNAP91,CLTC,SYT1,BIN1	6
MF	GO:0016860	intramolecular oxidoreductase activity	5/225	48/18369	0.000294096	0.0027795	0.00202134	MIF,PTGDS,TPI1,PDIA3,P4HB	5
MF	GO:0015078	proton transmembrane transporter activity	8/225	140/18369	0.000334363	0.00309929	0.00225391	COX2,ATP6V1H,ATP5F1A,ATP5F1B,ATP6V0D1,ATP6V1B2,ATP6V0A1,ATP6V1A	8
MF	GO:0030955	potassium ion binding	3/225	12/18369	0.00036767	0.00334371	0.00243166	ATP1A2,PKM,ATP1A1	3
MF	GO:0051861	glycolipid binding	4/225	29/18369	0.000409265	0.00365307	0.00265663	HSPA2,TPP1,EPDR1,THY1	4
MF	GO:0019902	phosphatase binding	9/225	187/18369	0.000510021	0.00446963	0.00325047	MAPK1,MAPT,YWHAE,CADM4,LGALS3,VCP,PPP3CB,HSP90B1,NHERF1	9
MF	GO:0005178	integrin binding	8/225	151/18369	0.000554404	0.00477183	0.00347023	ACTN4,VTN,PTPRZ1,PPIA,P4HB,THY1,ICAM5,CD81	8
MF	GO:0005539	glycosaminoglycan binding	10/225	232/18369	0.000599371	0.00506837	0.00368588	HAPLN1,VCAN,NCAN,DPYSL3,VTN,PPIA,HK1,ANXA6,CD44,BCAN	10
MF	GO:0031005	filamin binding	3/225	15/18369	0.00074003	0.00604567	0.00439661	DPYSL3,DPYSL4,CRMP1	3
MF	GO:0140776	protein-containing complex destabilizing activity	3/225	15/18369	0.00074003	0.00604567	0.00439661	NSF,HSPA1A,HSPA8	3
MF	GO:0005543	phospholipid binding	15/225	475/18369	0.000794454	0.00638211	0.00464128	MAPT,AMPH,HSPA8,ANXA5,PEBP1,GSN,SNAP91,TPP1,SPTBN2,ANXA6,EPDR1,THY1,SYT1,VAMP2,BIN1	15
MF	GO:0005516	calmodulin binding	9/225	200/18369	0.000825397	0.00652199	0.00474301	PPP3CA,PPP3CB,SPTAN1,MAP6,CAMK2A,CAMK2B,SYT1,ATP2B1,VAMP2	9
MF	GO:0001664	G protein-coupled receptor binding	11/225	289/18369	0.000906596	0.00704805	0.00512558	GNA11,HSPA1A,HSPA8,GNAI1,GNAS,UCHL1,C3,GNAO1,VPS35,ATP1A3,NHERF1	11
MF	GO:0097718	disordered domain specific binding	4/225	36/18369	0.000949237	0.00726242	0.00528147	HSPA1A,HSPA2,HSP90AB1,CLTC	4
MF	GO:0048306	calcium-dependent protein binding	5/225	62/18369	0.000967515	0.0072866	0.00529906	SYN1,SNAP25,ANXA6,SYT1,VAMP2	5
MF	GO:0031690	adrenergic receptor binding	3/225	18/18369	0.00129167	0.00943311	0.00686007	GNAS,UCHL1,NHERF1	3
MF	GO:0046933	proton-transporting ATP synthase activity, rotational mechanism	3/225	18/18369	0.00129167	0.00943311	0.00686007	ATP5F1A,ATP5F1B,ATP6V1A	3
MF	GO:0019905	syntaxin binding	5/225	68/18369	0.00146889	0.0105672	0.00768485	NSF,SNAP25,VAMP1,SYT1,VAMP2	5
MF	GO:0008238	exopeptidase activity	6/225	102/18369	0.00160072	0.0113463	0.00825139	CNDP2,SCRN1,CPE,LAP3,TPP1,NPEPPS	6
MF	GO:0003725	double-stranded RNA binding	5/225	70/18369	0.00167215	0.0116808	0.00849465	TUBB4B,HSP90AB1,SLC3A2,CLTC,EIF4A1	5
MF	GO:0019903	protein phosphatase binding	7/225	140/18369	0.00170893	0.0117672	0.00855748	MAPT,YWHAE,CADM4,LGALS3,VCP,PPP3CB,HSP90B1	7
MF	GO:0000149	SNARE binding	6/225	107/18369	0.00204277	0.0137174	0.00997576	NSF,SNAP25,VAMP1,SNAP91,SYT1,VAMP2	6
MF	GO:0099186	structural constituent of postsynapse	3/225	21/18369	0.00204908	0.0137174	0.00997576	INA,SPTBN2,POTEI	3
MF	GO:0035254	glutamate receptor binding	4/225	45/18369	0.00220342	0.0145486	0.0105802	NSF,GNAS,CAMK2A,NHERF1	4
MF	GO:0015631	tubulin binding	12/225	374/18369	0.00229862	0.0149721	0.0108882	NEFM,MAPT,NCALD,VAPA,RPS3,ALDOA,TPPP,TPPP3,MAP6,MAP1A,STMN1,TBCA	12
MF	GO:0001618	virus receptor activity	5/225	77/18369	0.00254781	0.0161585	0.011751	HSPA1A,MOG,CD81,RPSA,NCAM1	5
MF	GO:0005504	fatty acid binding	4/225	49/18369	0.00301631	0.0186392	0.0135551	FABP7,PTGDS,FABP3,GSTP1	4
MF	GO:0051287	NAD binding	4/225	52/18369	0.00374576	0.0227875	0.0165718	SIRT2,PHGDH,QDPR,CTBP1	4
MF	GO:0016667	oxidoreductase activity, acting on a sulfur group of donors	4/225	54/18369	0.00429337	0.0252366	0.0183529	PDIA3,P4HB,PRDX3,SELENBP1	4
MF	GO:0050840	extracellular matrix binding	4/225	55/18369	0.00458638	0.0266342	0.0193693	VTN,LGALS1,LGALS3,RPSA	4
MF	GO:0043177	organic acid binding	8/225	212/18369	0.00469962	0.0268739	0.0195436	FABP7,DDAH2,PTGDS,FABP3,HBB,PPIA,GSTP1,EPDR1	8
MF	GO:0043236	laminin binding	3/225	28/18369	0.00473918	0.0268739	0.0195436	LGALS1,LGALS3,RPSA	3
MF	GO:1901681	sulfur compound binding	9/225	269/18369	0.00606524	0.0337412	0.0245377	DPYSL3,VTN,LRP1,FTL,PPIA,GSTP1,TF,ANXA6,ACOT7	9
MF	GO:0016813	hydrolase activity, acting on carbon-nitrogen (but not peptide) bonds, in linear amidines	2/225	10/18369	0.00630023	0.0337412	0.0245377	PADI2,DDAH2	2
MF	GO:0032050	clathrin heavy chain binding	2/225	10/18369	0.00630023	0.0337412	0.0245377	LRP1,SNAP91	2
MF	GO:0035374	chondroitin sulfate binding	2/225	10/18369	0.00630023	0.0337412	0.0245377	DPYSL3,ANXA6	2
MF	GO:0030246	carbohydrate binding	9/225	273/18369	0.00665815	0.0352662	0.0256468	GAA,VCAN,NCAN,VTN,LGALS1,LGALS3,ALDOA,HK1,BCAN	9
MF	GO:0001786	phosphatidylserine binding	4/225	62/18369	0.00702046	0.0363856	0.0264608	HSPA8,ANXA5,ANXA6,SYT1	4
MF	GO:0098631	cell adhesion mediator activity	4/225	62/18369	0.00702046	0.0363856	0.0264608	NRCAM,RAB10,NFASC,RPSA	4
MF	GO:0005496	steroid binding	5/225	99/18369	0.00743279	0.037956	0.0276029	ATP1A2,ATP1A1,ANXA6,ATP1A3,CD81	5
MF	GO:0008199	ferric iron binding	2/225	11/18369	0.00763845	0.037956	0.0276029	FTL,TF	2
MF	GO:0016670	oxidoreductase activity, acting on a sulfur group of donors, oxygen as acceptor	2/225	11/18369	0.00763845	0.037956	0.0276029	P4HB,SELENBP1	2
MF	GO:1990459	transferrin receptor binding	2/225	11/18369	0.00763845	0.037956	0.0276029	TF,CD81	2
MF	GO:0008235	metalloexopeptidase activity	4/225	68/18369	0.00968433	0.0476311	0.0346389	CNDP2,CPE,LAP3,NPEPPS	4
